# Supplementary material for: Au- and Pd-catalyzed cyclization processes: synthesis of polyfunctionalized cyclopropanes
Source: Royal Society of Chemistry journal article supplement (doi:10.1039/d4qo00867g), 2024-01-01

# Supporting Information

## Au- and Pd-Catalyzed Cyclization Processes: Synthesis of Polyfunctionalized Cyclopropanes

Alexis Truchon,<sup>a</sup> Aurélien Dupeux,<sup>a</sup> Sandra Olivero,<sup>a</sup> Véronique Michelet<sup>a\*</sup>

<sup>a</sup>Université Côte d'Azur, Institut de Chimie de Nice, UMR 7272 CNRS, Valrose Park, 06108, Nice Cedex 2, France

\*Corresponding author, email: [veronique.michelet@univ-cotedazur.fr](mailto:veronique.michelet@univ-cotedazur.fr)

|                                                                             |           |
|-----------------------------------------------------------------------------|-----------|
| <b>1. General Information.....</b>                                          | <b>2</b>  |
| <b>2. Experimental Procedures and Characterization Data.....</b>            | <b>3</b>  |
| 2.1 General Procedure for the preparation of 1,6-enynes .....               | 3         |
| 2.2 General procedure for Pd-catalyzed C-H Activation .....                 | 13        |
| 2.3 General procedure for One Pot C-H Activation/Thermal rearrangement..... | 17        |
| 2.4 Post-Functionalization Procedure.....                                   | 19        |
| 2.5 Gram scale Reaction .....                                               | 21        |
| <b>3. Kinetic Isotope Effect (KIE) Experiments .....</b>                    | <b>22</b> |
| <b>4. X-ray Data .....</b>                                                  | <b>24</b> |
| <b>5. References.....</b>                                                   | <b>42</b> |
| <b>6. HPLC Spectra.....</b>                                                 | <b>43</b> |
| <b>7. NMR Spectra.....</b>                                                  | <b>44</b> |

# 1. General Information

Unless otherwise stated, commercial reagents and solvents were used without further purification. Solvents for chromatography [petroleum ether (PE), ethyl acetate (EtOAc), diethyl ether (Et<sub>2</sub>O) and Toluene (Tol)] were used as received without further purification. Reactions were monitored by analytical thin layer chromatography (TLC), which was performed on 0.20-mm pre-coated silica plates (Kieselgel 60, F254; Macherey-Nagel GmbH & Co. KG, Düren, Germany). Products were purified by flash chromatography on 200–300 mesh silica gels, SiO<sub>2</sub>. Some solvents for use in reactions were freshly distilled [tetrahydrofuran (THF) and toluene (Tol)] were distilled from sodium/benzophenone ketyl]. Some solvents for use in reactions were placed in 4 Å MS over 24h. [Dichloromethane (DCM) and Dichloroethane (DCE)] NMR spectra (<sup>1</sup>H, <sup>13</sup>C, and <sup>19</sup>F NMR spectra, and COSY, DEPT135, HSQC, HMBC, NOESY) were recorded on a Bruker Avance 400 MHz spectrometer (Bruker, Rheinstetten, Germany). All NMR spectra were recorded in CDCl<sub>3</sub>, CD<sub>2</sub>Cl<sub>2</sub>, (CD<sub>3</sub>)<sub>2</sub>SO or (CD<sub>3</sub>)<sub>2</sub>CO at room temperature (20 ± 3 °C). All chemical shifts are quoted in parts per million downfield from tetramethylsilane (TMS) as an internal standard. The peak patterns are indicated as follows: s, singlet; d, doublet; t, triplet; m, multiplet; q, quartet. The coupling constants, *J*, are reported in Hertz [Hz] and result from averaging the experimentally found values. Analytical GC/MS analyses were performed on a Shimadzu QP2010S- MS chromatograph (EI, 70 eV), equipped with an SLB-5ms capillary column (thickness 0.25 mm, length 30 m, and inside diameter 0.25 mm). High resolution mass spectroscopy (HRMS) analyses for new compounds were performed by Institut de Chimie de Nice using a Thermo Vanquish UHPLC-Q-Exactive Focus Mass Spectrometer equipped with H-ESI source operated in a positive mode and by Plateforme Bernard Rossi, CEA TIRO, on a LTQ Orbitrap hybrid mass spectrometer with an electrospray-ionization (ESI) probe (ThermoScientific; San Jose, CA, USA) by direct infusion. The following products were prepared by the reported procedures: diisopropyl-2-(2-methylallyl)-2-(prop-2-yn-1-yl)malonate (**1a**)<sup>[1]</sup>, dimethyl-2-(2-methylallyl)-2-(prop-2-yn-1-yl)malonate (**1b**)<sup>[1]</sup>, diisopropyl-2-allyl-2-(prop-2-yn-1-yl)malonate (**1c**)<sup>[1]</sup>, diisopropyl-3-(2-bromophenyl)-3a-methyltetrahydro-3*H*-cyclopenta[*c*]cyclopropa[*b*]furan-5,5(6*H*)-dicarboxylate (**2a**)<sup>[1]</sup>, dimethyl-3-(2-bromophenyl)-3a-methyltetrahydro-3*H*-cyclopenta[*c*]cyclopropa[*b*]furan-5,5(6*H*)-dicarboxylate (**2b**)<sup>[1]</sup>, diisopropyl-3-(2-bromophenyl)tetrahydro-3*H*-cyclopenta[*c*]cyclopropa[*b*]furan-5,5(6*H*)-dicarboxylate (**2c**)<sup>[1]</sup>, 2-propenyl-1-ethynylbenzenes (**1d**)<sup>[2]</sup>, 2-(2-methylallyl)-2-(prop-2-yn-1-yl)propane-1,3-diol<sup>[3]</sup>.

Spectral data were consistent with data reported in the literature.

## 2. Experimental Procedures and Characterization Data

### 2.1 General Procedure for the preparation of 1,6-enynes

#### 2.1.1 Synthesis of 2-(2-methylallyl)-2-(prop-2-yn-1-yl) propane-1,3-diol (1e)

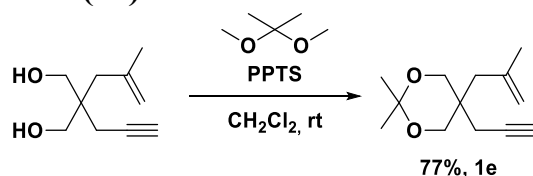

A round-bottomed flask, equipped with a magnetic stirring bar, was charged with pyridinium *p*-toluene sulfonate (291.10 mg, 1.69 mmol, 0.2 eq.), 2-(2-methylallyl)-2-(prop-2-yn-1-yl) propane-1,3-diol (1.41 g, 8.4 mmol, 1 eq.), 2,2-dimethoxypropane (5.27 g, 50.61 mmol, 6 eq.), and CH<sub>2</sub>Cl<sub>2</sub> (28.0 mL, 0.3 M). The resulting mixture was stirred at room temperature for 12 h. Then an aqueous saturated solution of NaHCO<sub>3</sub> and H<sub>2</sub>O were added to the flask. The organic materials were extracted with CH<sub>2</sub>Cl<sub>2</sub>. The combined organic layer was washed with H<sub>2</sub>O and brine, dried over MgSO<sub>4</sub>, and concentrated removed under reduced pressure. The crude was purified by flash column chromatography on silica gel. (6.53 mmol, 1.36g, 77% yield)

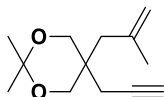

Chemical Formula: C<sub>13</sub>H<sub>20</sub>O<sub>2</sub>

Exact Mass: 208,1463

#### 2-(2-methylallyl)-2-(prop-2-yn-1-yl) propane-1,3-diol (1e)

<sup>1</sup>H NMR (400 MHz, CDCl<sub>3</sub>) δ 4.93 (dd, *J* = 2.2, 1.4 Hz, 1H), 4.79 (dd, *J* = 2.2, 1.0 Hz, 1H), 3.71 – 3.66 (m, 4H), 2.45 (d, *J* = 2.7 Hz, 2H), 2.12 (d, *J* = 0.8 Hz, 2H), 2.04 (t, *J* = 2.7 Hz, 1H), 1.79 (dd, *J* = 1.4, 0.8 Hz, 3H), 1.42 (s, 3H), 1.41 (s, 3H).

<sup>13</sup>C{<sup>1</sup>H} NMR (101 MHz, CDCl<sub>3</sub>) δ 140.8, 115.5, 98.1, 81.2, 71.2, 67.0, 39.8, 35.9, 26.3, 25.2, 22.4, 21.3.

HRMS (ESI) *m/z* [M + H]<sup>+</sup> calcd for C<sub>13</sub>H<sub>21</sub>O<sub>2</sub> 209.1536, found 209.1536.

#### 1.1.1 Synthesis of dimethyl-2-(2-methylallyl-3,3-d2)-2-(prop-2-yn-1-yl) malonate (d-1b)

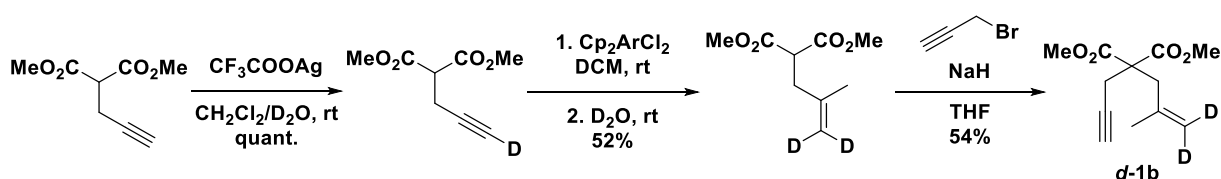

Dimethyl 2-(prop-2-yn-1-yl)malonate (1.0 g, 5.8 mmol, 1 eq.) was added to a vigorously stirred solution of CF<sub>3</sub>COOAg (64.9 mg, 0.294 mmol, 5 mol%) and D<sub>2</sub>O (2.35 g, 117.5 mmol,

20 eq.) in CH<sub>2</sub>Cl<sub>2</sub> (12 mL, 0.5 M) under air. The reaction mixture was stirred at 25°C for 16 h. The product was extracted with DCM (3 x 20 mL). The combined organic layer passed through celite and the solution was dried over MgSO<sub>4</sub>. The volatiles were removed under vacuum and the product was used in the next step without further purification (1 g, 5.84 mmol, >99%). Spectral data were consistent with data reported in the literature.<sup>[4]</sup>

To a suspension of Cp<sub>2</sub>ZrCl<sub>2</sub> (1.77 g, 5.84 mmol, 1.0 eq.) and AlMe<sub>3</sub> (8.76 mL, 17.53 mmol, 3.0 eq.) in DCE (60 mL) was added dimethyl-2-(prop-2-yn-1-yl-3-d)malonate (1.0 g, 5.84 mmol, 1.0 eq) in DCE (50 mL) dropwise at 0°C. After the reaction mixture is stirred for 12 h at room temperature, it was treated with D<sub>2</sub>O (3.0 mL) and then with saturated aqueous Na<sub>2</sub>CO<sub>3</sub> at 0°C. The heterogeneous mixture was extracted with Et<sub>2</sub>O. The organic layers were combined, dried over MgSO<sub>4</sub>, and concentrated in vacuo. Flash column chromatography (Et<sub>2</sub>O/petroleum ether=30/70) provided the corresponding allyl malonate (570 mg, 52%) as a colorless oil.

Dimethyl 2-(2-methylallyl-3,3-d<sub>2</sub>)malonate (570 mg, 3.03 mmol, 1 eq.) in THF (5 mL) was added slowly to a suspension of NaH (98 %) (145 mg, 6.06 mmol, 2 eq.) in THF (5 mL) under N<sub>2</sub>, and the mixture was stirred at room temperature for 1 h. Then, a solution of propargyl bromide (900 mg, 6.06 mmol, 2 eq.) in THF (5 mL) was added dropwise in the mixture at 0°C and the resulting mixture was stirred at room temperature for 2 h. Water was added slowly to quench the reaction, and the reaction mixture was extracted with Et<sub>2</sub>O. The combined organic extracts were washed three times with H<sub>2</sub>O and brine, dried over Na<sub>2</sub>SO<sub>4</sub>, filtered and concentrated. The crude product **d-1b** was purified by silica gel flash chromatography. (365 mg, 1.61 mmol, 54%)

Spectral data were consistent with data reported in the literature.<sup>[5]</sup>

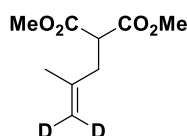

Chemical Formula: C<sub>9</sub>H<sub>12</sub>D<sub>2</sub>O<sub>4</sub>

Exact Mass: 188,1018

#### Dimethyl 2-(2-methylallyl-3,3-d<sub>2</sub>)malonate

(0.075 g, 0.184 mmol, 69%)

<sup>1</sup>H NMR (400 MHz, CDCl<sub>3</sub>) δ 3.73 (s, 6H), 2.61 (d, *J* = 1.4 Hz, 2H), 1.74 (s, 3H).

<sup>13</sup>C{<sup>1</sup>H} NMR (101 MHz, CDCl<sub>3</sub>) δ 169.6, 141.5, 52.7, 50.5, 36.5, 22.3.

HRMS (ESI) *m/z* [M + H]<sup>+</sup> calcd for C<sub>9</sub>H<sub>13</sub>D<sub>2</sub>O<sub>4</sub> 189.1090, found 189.1090.

## 2.1.2 General procedure A for Gold(I)-Catalyzed Prins-Type Cyclization

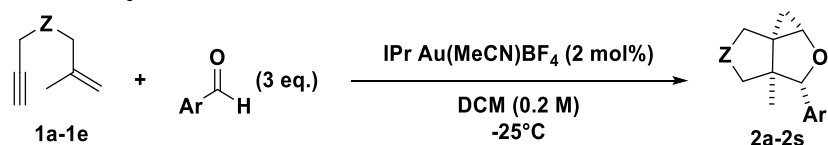

*General procedure A:* a solution of 1,6-enyne (0.446-3.360 mmol, 1 eq.) and the corresponding commercially available aldehyde (3 eq.) in dry CH<sub>2</sub>Cl<sub>2</sub> (0.2 M) was cooled to -25°C, and the gold complex (2 mol %) was added after 15 min. The solution was kept at -25°C for 8h and then the cooling device was switched off, which initiated slow warming to RT. After TLC monitoring, the mixture was filtered through a short pad of silica with a 1:1 petroleum ether/EtOAc mixture as the eluting solvent, and the solvents were evaporated under reduced pressure. The crude product was purified by silica gel flash chromatography using an EtOAc/petroleum ether mixture as the eluant.

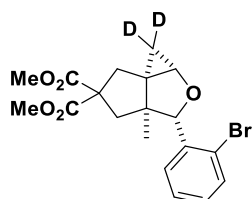

**Chemical Formula:** C<sub>19</sub>H<sub>19</sub>D<sub>2</sub>BrO<sub>5</sub>  
**Exact Mass:** 410,0698

### Dimethyl-3-(2-bromophenyl)-3a-methyltetrahydro-3H-cyclopenta[c]cyclopropa[b]furan-5,5(6H)-dicarboxylate-1,1-d<sub>2</sub> (2b-D)

Prepared according to GP A using 1.61 mmol of **1b-d** (0.455 g, 1.11 mmol, 69%)

<sup>1</sup>H NMR (400 MHz, CDCl<sub>3</sub>) δ 7.48 (dd, *J* = 8.0, 1.3 Hz, 1H), 7.41 (dd, *J* = 7.8, 1.8 Hz, 1H), 7.28 – 7.23 (m, 1H), 7.08 (td, *J* = 7.6, 1.8 Hz, 1H), 5.71 (s, 1H), 3.85 (s, 3H), 3.81 (s, 1H), 3.74 (s, 3H), 3.55 (dd, *J* = 14.4, 1.6 Hz, 1H), 2.45 (dd, *J* = 13.4, 0.8 Hz, 1H), 2.27 – 2.17 (m, 2H), 0.68 (s, 3H).

<sup>13</sup>C{<sup>1</sup>H} NMR (101 MHz, CDCl<sub>3</sub>) δ 172.4, 172.1, 139.6, 132.8, 129.0, 128.9, 127.1, 122.0, 96.7, 64.5, 60.4, 53.0, 53.0, 52.9, 47.9, 41.3, 38.0, 22.2.

**HRMS** (ESI) *m/z* [M + H]<sup>+</sup> calcd for C<sub>19</sub>H<sub>20</sub>D<sub>2</sub>BrO<sub>5</sub> 411.0771 found 411.0772.

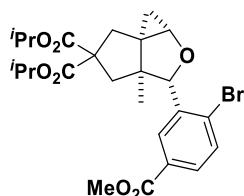

**Chemical Formula:** C<sub>25</sub>H<sub>31</sub>BrO<sub>7</sub>  
**Exact Mass:** 522,1253

### Diisopropyl-3-(2-bromo-5-(methoxycarbonyl)phenyl)-3a-methyltetrahydro-3H-cyclopenta[c]cyclopropa[b]furan-5,5(6H)-dicarboxylate (2d)

Prepared according to GP A using 0.713 mmol of **1a** (0.059 g, 0.113 mmol, 16%)

<sup>1</sup>H NMR (400 MHz, CDCl<sub>3</sub>) δ 8.06 (d, *J* = 2.2 Hz, 1H), 7.74 (dd, *J* = 8.3, 2.2 Hz, 1H), 7.57 (d, *J* = 8.3 Hz, 1H), 5.82 (s, 1H), 5.18 (p, *J* = 6.3 Hz, 1H), 5.04 (p, *J* = 6.2 Hz, 1H), 3.90 (s, 3H),

3.85 (dd,  $J = 4.9, 1.6$  Hz, 1H), 3.53 (dd,  $J = 14.3, 1.5$  Hz, 1H), 2.45 (d,  $J = 13.4$  Hz, 1H), 2.28 – 2.08 (m, 2H), 1.32 (dd,  $J = 6.3, 5.2$  Hz, 6H), 1.24 (dd,  $J = 6.3, 3.4$  Hz, 6H), 1.11 (dd,  $J = 6.7, 1.7$  Hz, 1H), 0.86 (dd,  $J = 6.7, 4.9$  Hz, 1H), 0.66 (s, 3H).

$^{13}\text{C}\{^1\text{H}\}$  NMR (101 MHz,  $\text{CDCl}_3$ )  $\delta$  171.5, 171.2, 166.6, 140.7, 133.0, 129.9, 129.7, 129.3, 127.3, 96.5, 69.5, 69.3, 65.0, 60.8, 53.1, 52.4, 47.9, 41.7, 37.8, 22.5, 21.8, 21.8, 21.7, 21.7, 19.5.  
HRMS (ESI)  $m/z$   $[\text{M} + \text{H}]^+$  calcd for  $\text{C}_{25}\text{H}_{32}\text{BrO}_7$  523.1326, found 523.1326.

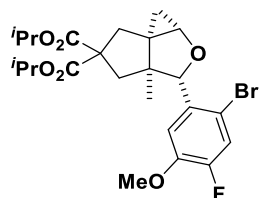

Chemical Formula:  $\text{C}_{24}\text{H}_{30}\text{BrFO}_6$   
Exact Mass: 512,1210

### Diisopropyl-3-(2-bromo-4-fluoro-5-methoxyphenyl)-3a-methyltetrahydro-3H-cyclopenta[c]cyclopropano[b]furan-5,5(6H)-dicarboxylate (2e)

Prepared according to GP A using 0.713 mmol of **1a** (0.061 g, 0.119 mmol, 17%)

$^1\text{H}$  NMR (400 MHz,  $\text{CDCl}_3$ )  $\delta$  7.21 (d,  $J = 10.4$  Hz, 1H), 7.04 (d,  $J = 9.1$  Hz, 1H), 5.71 (s, 1H), 5.17 (p,  $J = 6.3$  Hz, 1H), 5.04 (p,  $J = 6.3$  Hz, 1H), 3.86 (s, 3H), 3.82 (dd,  $J = 4.9, 1.6$  Hz, 1H), 3.50 (dd,  $J = 14.3, 1.5$  Hz, 1H), 2.44 (d,  $J = 13.4$  Hz, 1H), 2.21 – 2.09 (m, 2H), 1.31 (t,  $J = 6.3$  Hz, 6H), 1.26 – 1.20 (m, 6H), 0.99 (dd,  $J = 6.5, 1.7$  Hz, 1H), 0.84 (dd,  $J = 6.6, 4.9$  Hz, 1H), 0.67 (s, 3H).

$^{19}\text{F}\{^1\text{H}\}$  NMR (376 MHz,  $\text{CDCl}_3$ )  $\delta$  -134.5.

$^{13}\text{C}\{^1\text{H}\}$  NMR (101 MHz,  $\text{CDCl}_3$ )  $\delta$  171.4, 171.1, 146.9 (d,  $J = 10.3$  Hz), 136.2 (d,  $J = 3.7$  Hz), 120.2 (d,  $J = 21.3$  Hz), 113.3 (d,  $J = 2.1$  Hz), 111.0 (d,  $J = 8.2$  Hz), 96.5, 69.5, 69.3, 64.8, 60.8, 56.5, 53.0, 47.9, 41.6, 37.8, 22.3, 21.8 (d,  $J = 4.3$  Hz), 21.7 (d,  $J = 2.2$  Hz), 19.5.

HRMS (ESI)  $m/z$   $[\text{M} + \text{H}]^+$  calcd for  $\text{C}_{24}\text{H}_{31}\text{BrFO}_6$  513.1283, found 513.1287.

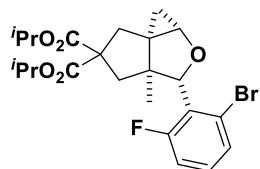

Chemical Formula:  $\text{C}_{23}\text{H}_{28}\text{BrFO}_5$   
Exact Mass: 482,1104

### Diisopropyl-3-(2-bromo-6-fluorophenyl)-3a-methyltetrahydro-3H-cyclopenta[c]cyclopropano[b]furan-5,5(6H)-dicarboxylate (2f)

Prepared according to GP A using 0.713 mmol of **1a** (0.093 g, 0.258 mmol, 36%)

$^1\text{H}$  NMR (400 MHz,  $\text{CDCl}_3$ )  $\delta$  7.34 (dt,  $J = 7.9, 1.1$  Hz, 1H), 7.07 (td,  $J = 8.1, 5.5$  Hz, 1H), 6.97 (ddd,  $J = 11.4, 8.3, 1.3$  Hz, 1H), 5.98 (d,  $J = 1.5$  Hz, 1H), 5.19 (p,  $J = 6.3$  Hz, 1H), 5.05 (dq,  $J = 12.5, 6.2$  Hz, 1H), 3.81 (dd,  $J = 5.1, 1.7$  Hz, 1H), 3.42 (dd,  $J = 14.3, 1.6$  Hz, 1H), 2.46 (d,  $J = 13.3$  Hz, 1H), 2.18 (dd,  $J = 13.3, 1.6$  Hz, 1H), 2.05 (d,  $J = 14.3$  Hz, 1H), 1.38 (dt,  $J = 6.4, 1.4$  Hz, 1H), 1.32 (t,  $J = 6.1$  Hz, 6H), 1.24 (dd,  $J = 6.3, 2.5$  Hz, 6H), 0.91 (d,  $J = 1.1$  Hz, 3H), 0.80 (dd,  $J = 6.5, 5.0$  Hz, 1H).

$^{19}\text{F}\{^1\text{H}\}$  NMR (376 MHz,  $\text{CDCl}_3$ )  $\delta$  -104.6.

$^{13}\text{C}\{^1\text{H}\}$  NMR (101 MHz,  $\text{CDCl}_3$ )  $\delta$  171.4, 171.2, 162.9, 160.4, 129.74 (d,  $J = 10.1$  Hz), 129.22 (d,  $J = 3.4$  Hz), 126.65 (d,  $J = 11.9$  Hz), 123.66 (d,  $J = 5.9$  Hz), 116.18 (d,  $J = 24.4$  Hz), 96.7, 69.5, 69.3, 65.7, 60.8, 54.0, 47.5, 41.7, 38.1, 21.8, 21.8, 21.7, 21.7, 21.7, 19.1, 19.1.

HRMS (ESI)  $m/z$   $[\text{M} + \text{H}]^+$  calcd for  $\text{C}_{23}\text{H}_{29}\text{BrFO}_5$  483.1177, found 483.1181.

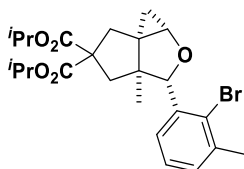

Chemical Formula:  $C_{24}H_{31}BrO_5$   
Exact Mass: 478,1355

**Diisopropyl-3-(2-bromo-3-methylphenyl)-3a-methyltetrahydro-3H-cyclopenta[c]cyclopropa[b]furan-5,5(6H)-dicarboxylate (2g)**

Prepared according to GP A using 0.713 mmol of **1a** (0.139 g, 0.290 mmol, 41%)

$^1H$  NMR (400 MHz,  $CDCl_3$ )  $\delta$  7.23 (d,  $J = 2.0$  Hz, 1H), 7.15 (t,  $J = 7.5$  Hz, 1H), 7.11 (dd,  $J = 7.5, 2.0$  Hz, 1H), 5.87 (s, 1H), 5.30 (s, 1H), 5.18 (hept,  $J = 6.2$  Hz, 1H), 5.03 (h,  $J = 6.3$  Hz, 1H), 3.81 (dd,  $J = 5.0, 1.7$  Hz, 1H), 3.56 (dd,  $J = 14.3, 1.5$  Hz, 1H), 2.47 – 2.42 (m, 1H), 2.40 (s, 3H), 2.22 – 2.13 (m, 2H), 1.32 (dd,  $J = 7.3, 6.3$  Hz, 6H), 1.24 (dd,  $J = 6.3, 4.0$  Hz, 6H), 1.04 (dd,  $J = 6.5, 1.8$  Hz, 1H), 0.80 (dd,  $J = 6.6, 4.9$  Hz, 1H), 0.66 (s, 3H).

$^{13}C\{^1H\}$  NMR (101 MHz,  $CDCl_3$ )  $\delta$  171.5, 171.3, 140.6, 138.2, 129.7, 126.7, 126.3, 124.7, 97.3, 69.4, 69.2, 64.8, 60.9, 52.9, 48.3, 41.6, 37.9, 24.0, 22.4, 21.8, 21.8, 21.7, 21.7, 21.7, 19.0.

HRMS (ESI)  $m/z$   $[M + H]^+$  calcd for  $C_{24}H_{32}BrO_5$  479.1428, found 479.1431.

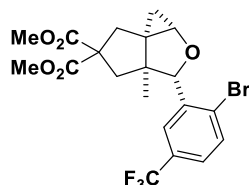

Chemical Formula:  $C_{20}H_{20}BrF_3O_5$   
Exact Mass: 476,0446

**Dimethyl-3-(2-bromo-5-(trifluoromethyl)phenyl)-3a-methyltetrahydro-3H-cyclopenta[c]cyclopropa[b]furan-5,5(6H)-dicarboxylate (2i)**

Prepared according to GP A using 1.11 mmol of **1b** (0.164 g, 0.344 mmol, 31%)

$^1H$  NMR (400 MHz,  $CDCl_3$ )  $\delta$  7.67 (d,  $J = 2.3$  Hz, 1H), 7.62 (dd,  $J = 8.3, 0.9$  Hz, 1H), 7.34 (dd,  $J = 8.3, 2.3$  Hz, 1H), 5.75 (s, 1H), 3.85 (s, 4H), 3.75 (s, 3H), 3.56 (dd,  $J = 14.4, 1.6$  Hz, 1H), 2.56 – 2.41 (m, 1H), 2.27 – 2.16 (m, 2H), 1.14 – 1.06 (m, 1H), 0.87 (dd,  $J = 6.8, 4.9$  Hz, 1H), 0.66 (s, 3H).

$^{19}F\{^1H\}$  NMR (376 MHz,  $CDCl_3$ )  $\delta$  -62.7.

$^{13}C\{^1H\}$  NMR (101 MHz,  $CDCl_3$ )  $\delta$  172.3, 171.9, 141.0, 133.4, 129.74 (q,  $J = 32.8$  Hz), 125.85 (q,  $J = 3.9$  Hz), 125.63 (d,  $J = 1.5$  Hz), 125.49 (q,  $J = 3.7$  Hz), 124.0 (q,  $J = 272.9$  Hz), 96.2, 64.8, 60.3, 53.1, 53.1, 53.0, 47.9, 41.6, 37.9, 22.3, 19.6.

HRMS (ESI)  $m/z$   $[M + H]^+$  calcd for  $C_{20}H_{21}BrF_3O_5$  477.0519, found 477.0518.

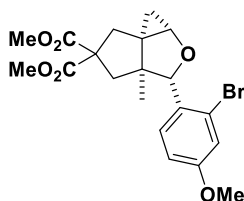

Chemical Formula:  $C_{20}H_{23}BrO_6$   
Exact Mass: 438,0678

**Dimethyl-3-(2-bromo-4-methoxyphenyl)-3a-methyltetrahydro-3H-cyclopenta[c]cyclopropa[b]furan-5,5(6H)-dicarboxylate (2j)**

Prepared according to GP A using 0.446 mmol of **1b** (0.079 g, 0.222 mmol, 50%)

**<sup>1</sup>H NMR** (400 MHz, CDCl<sub>3</sub>) δ 7.29 (d, *J* = 8.8 Hz, 1H), 7.03 (d, *J* = 2.7 Hz, 1H), 6.81 (dd, *J* = 8.7, 2.6 Hz, 1H), 5.63 (s, 1H), 3.85 (s, 3H), 3.82 – 3.78 (m, 1H), 3.77 (s, 3H), 3.74 (s, 3H), 3.50 (dd, *J* = 14.3, 1.6 Hz, 1H), 2.42 (d, *J* = 13.3 Hz, 1H), 2.23 (dd, *J* = 13.3, 1.5 Hz, 1H), 2.18 (d, *J* = 14.3 Hz, 1H), 1.05 (dd, *J* = 6.6, 1.7 Hz, 1H), 0.83 (dd, *J* = 6.6, 4.9 Hz, 1H), 0.67 (s, 3H).

**<sup>13</sup>C{<sup>1</sup>H} NMR** (101 MHz, CDCl<sub>3</sub>) δ 172.4, 172.1, 159.2, 131.3, 129.6, 122.1, 117.7, 113.3, 96.5, 64.4, 60.3, 55.6, 53.0, 53.0, 52.9, 47.6, 41.4, 38.1, 22.1, 19.7.

**HRMS** (ESI) *m/z* [M + H]<sup>+</sup> calcd for C<sub>20</sub>H<sub>24</sub>BrO<sub>6</sub> 439.0751, found 439.0753.

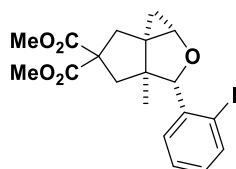

**Chemical Formula:** C<sub>19</sub>H<sub>21</sub>IO<sub>5</sub>

**Exact Mass:** 456,0434

### Dimethyl-3-(2-iodophenyl)-3a-methyltetrahydro-3H-cyclopenta[c]cyclopropa[b]furan-5,5(6H)-dicarboxylate (2k)

Prepared according to GP A using 1.11 mmol of **1b** (0.232 g, 0.508 mmol, 46%)

**<sup>1</sup>H NMR** (400 MHz, CDCl<sub>3</sub>) δ 7.78 (dd, *J* = 7.9, 1.2 Hz, 1H), 7.37 – 7.27 (m, 2H), 6.92 (ddd, *J* = 7.9, 6.9, 2.0 Hz, 1H), 5.62 (s, 1H), 3.86 (s, 3H), 3.82 (dd, *J* = 5.0, 1.7 Hz, 1H), 3.75 (s, 3H), 3.69 (dd, *J* = 14.4, 1.5 Hz, 1H), 2.47 (dd, *J* = 13.5, 0.7 Hz, 1H), 2.29 – 2.12 (m, 2H), 1.09 (dd, *J* = 6.6, 1.8 Hz, 1H), 0.83 (dd, *J* = 6.7, 4.9 Hz, 1H), 0.69 (s, 3H).

**<sup>13</sup>C{<sup>1</sup>H} NMR** (101 MHz, CDCl<sub>3</sub>) δ 172.2, 171.7, 138.3, 129.9, 124.8, 106.6, 94.3, 64.8, 60.1, 53.1, 53.0, 52.9, 46.9, 41.6, 38.0, 21.2, 20.6

**HRMS** (ESI) *m/z* [M + H]<sup>+</sup> calcd for C<sub>19</sub>H<sub>22</sub>IO<sub>5</sub> 457.0506, found 457.0508.

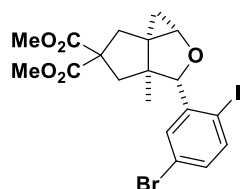

**Chemical Formula:** C<sub>19</sub>H<sub>20</sub>BrIO<sub>5</sub>

**Exact Mass:** 533,9539

### Dimethyl-3-(5-bromo-2-iodophenyl)-3a-methyltetrahydro-3H-cyclopenta[c]cyclopropa[b]furan-5,5(6H)-dicarboxylate (2l)

Prepared according to GP A using 0.713 mmol of **1b** (0.097 g, 0.182 mmol, 20%)

**<sup>1</sup>H NMR** (400 MHz, CDCl<sub>3</sub>) δ 7.62 (d, *J* = 8.4 Hz, 1H), 7.46 (d, *J* = 2.5 Hz, 1H), 7.06 (dd, *J* = 8.4, 2.5 Hz, 1H), 5.57 (s, 1H), 3.86 (s, 3H), 3.81 (dd, *J* = 5.0, 1.7 Hz, 1H), 3.75 (s, 3H), 3.68 (dd, *J* = 14.4, 1.5 Hz, 1H), 2.48 (dd, *J* = 13.4, 0.7 Hz, 1H), 2.31 – 2.13 (m, 2H), 1.08 (dd, *J* = 6.8, 1.8 Hz, 1H), 0.85 (dd, *J* = 6.8, 5.0 Hz, 1H), 0.71 (s, 3H).

**<sup>13</sup>C{<sup>1</sup>H} NMR** (101 MHz, CDCl<sub>3</sub>) δ 172.4, 172.0, 145.3, 140.9, 132.4, 131.9, 122.7, 99.8, 95.0, 64.9, 60.5, 53.3, 53.1, 53.1, 48.9, 41.7, 37.9, 22.8, 19.2

**HRMS** (ESI) *m/z* [M + H]<sup>+</sup> calcd for C<sub>19</sub>H<sub>21</sub>BrIO<sub>5</sub> 534.9612, found 534.9617



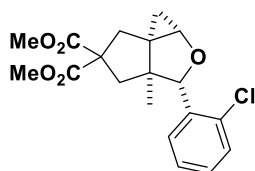

Chemical Formula: C<sub>19</sub>H<sub>21</sub>ClO<sub>5</sub>  
Exact Mass: 364,1078

**Dimethyl-3-(2-chlorophenyl)-3a-methyltetrahydro-3H-cyclopenta[c]cyclopropa[b]furan-5,5(6H)-dicarboxylate (2m)**

Prepared according to GP A using 1.11 mmol of **1b** (0.328 g, 0.899 mmol, 81%)

<sup>1</sup>H NMR (400 MHz, CDCl<sub>3</sub>) δ 7.44 (d, *J* = 7.7 Hz, 1H), 7.31 – 7.27 (m, 1H), 7.21 (t, *J* = 7.5 Hz, 1H), 7.18 – 7.13 (m, 1H), 5.72 (s, 1H), 3.85 (d, *J* = 1.0 Hz, 3H), 3.83 (d, *J* = 5.0 Hz, 1H), 3.75 (d, *J* = 1.0 Hz, 3H), 3.45 (d, *J* = 14.3 Hz, 1H), 2.44 (d, *J* = 13.3 Hz, 1H), 2.25 (d, *J* = 13.3 Hz, 1H), 2.18 (d, *J* = 14.3 Hz, 1H), 1.07 (dt, *J* = 6.6, 1.3 Hz, 1H), 0.88 – 0.82 (m, 1H), 0.67 (s, 3H).

<sup>13</sup>C{<sup>1</sup>H} NMR (101 MHz, CDCl<sub>3</sub>) δ 172.4, 172.1, 137.7, 131.9, 129.4, 128.6, 128.5, 126.5, 94.9, 64.6, 60.3, 53.0, 53.0, 52.8, 47.3, 41.4, 38.1, 21.9, 19.8.

HRMS (ESI) *m/z* [M + H]<sup>+</sup> calcd for C<sub>19</sub>H<sub>21</sub>BrIO<sub>5</sub> 365.1150, found 365.1151

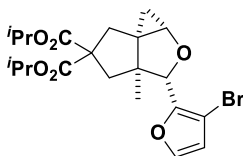

Chemical Formula: C<sub>21</sub>H<sub>27</sub>BrO<sub>6</sub>  
Exact Mass: 454,0991

**Diisopropyl-3-(3-bromofuran-2-yl)-3a-methyltetrahydro-3H-cyclopenta[c]cyclopropa[b]furan-5,5(6H)-dicarboxylate (2n)**

Prepared according to GP A using 0.713 mmol of **1a** (0.240 g, 0.666 mmol, 94%)

<sup>1</sup>H NMR (400 MHz, CDCl<sub>3</sub>) δ 7.32 (d, *J* = 2.0 Hz, 1H), 6.36 (d, *J* = 1.9 Hz, 1H), 5.43 (s, 1H), 5.15 (p, *J* = 6.2 Hz, 1H), 5.03 (p, *J* = 6.3 Hz, 1H), 3.82 (dd, *J* = 5.0, 1.7 Hz, 1H), 2.92 (dd, *J* = 14.2, 1.4 Hz, 1H), 2.49 – 2.38 (m, 1H), 2.21 (dd, *J* = 13.5, 1.4 Hz, 1H), 2.16 (d, *J* = 14.2 Hz, 1H), 1.37 – 1.28 (m, 7H), 1.22 (dd, *J* = 6.3, 2.6 Hz, 6H), 0.89 – 0.77 (m, 4H).

<sup>13</sup>C{<sup>1</sup>H} NMR (101 MHz, CDCl<sub>3</sub>) δ 171.4, 171.1, 148.6, 142.7, 113.9, 98.4, 89.8, 69.5, 69.3, 65.1, 60.3, 54.0, 46.5, 40.5, 37.8, 21.8, 21.7, 21.7, 20.7, 19.4.

HRMS (ESI) *m/z* [M + H]<sup>+</sup> calcd for C<sub>21</sub>H<sub>28</sub>BrO<sub>6</sub> 455.1064, found 455.1067.

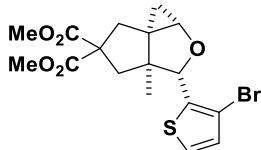

Chemical Formula: C<sub>17</sub>H<sub>19</sub>BrO<sub>5</sub>S  
Exact Mass: 414,0137

**Dimethyl-3-(3-bromothiophen-2-yl)-3a-methyltetrahydro-3H-cyclopenta[c]cyclopropa[b]furan-5,5(6H)-dicarboxylate (2o)**

Prepared according to GP A using 1.11 mmol of **1b** (0.340 g, 0.819 mmol, 73%)

<sup>1</sup>H NMR (400 MHz, CDCl<sub>3</sub>) δ 7.15 (d, *J* = 5.3 Hz, 1H), 6.87 (d, *J* = 5.3 Hz, 1H), 5.57 (s, 1H), 3.83 (s, 3H), 3.82 – 3.75 (m, 1H), 3.72 (s, 3H), 3.38 (dd, *J* = 14.4, 1.6 Hz, 1H), 2.48 – 2.35 (m, 1H), 2.22 (dd, *J* = 13.4, 1.6 Hz, 1H), 2.16 (d, *J* = 14.4 Hz, 1H), 1.08 (dd, *J* = 6.7, 1.7 Hz, 1H), 0.85 (dd, *J* = 6.6, 4.9 Hz, 1H), 0.79 (s, 3H).

<sup>13</sup>C{<sup>1</sup>H} NMR (101 MHz, CDCl<sub>3</sub>) δ 172.4, 172.1, 142.9, 139.7, 129.2, 128.9, 127.8, 100.3, 97.3, 64.8, 60.5, 53.2, 53.0, 53.0, 48.9, 41.7, 38.0, 22.8, 19.1.

**HRMS** (ESI)  $m/z$   $[M + H]^+$  calcd for  $C_{17}H_{20}BrO_5S$  415.0209, found 415.0210.

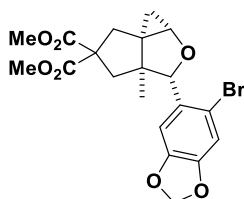

**Chemical Formula:**  $C_{20}H_{21}BrO_7$   
**Exact Mass:** 452,0471

**Dimethyl-3-(6-bromobenzo[d][1,3]dioxol-5-yl)-3a-methyltetrahydro-3H-cyclopenta[c]cyclopropa[b]furan-5,5(6H)-dicarboxylate (2p)**

Prepared according to GP A using 1.11 mmol of **1b** (0.100 g, 0.221 mmol, 20%)

**$^1H$  NMR** (400 MHz,  $CDCl_3$ )  $\delta$  6.91 (d,  $J = 15.3$  Hz, 2H), 5.95 (s, 2H), 5.62 (s, 1H), 3.84 (s, 3H), 3.79 (dd,  $J = 4.9, 1.6$  Hz, 1H), 3.74 (s, 3H), 3.50 (dd,  $J = 14.4, 1.6$  Hz, 1H), 2.43 (dd,  $J = 13.3, 0.7$  Hz, 1H), 2.24 – 2.14 (m, 2H), 1.04 (dd,  $J = 6.6, 1.7$  Hz, 1H), 0.83 (dd,  $J = 6.7, 4.9$  Hz, 1H), 0.71 (s, 3H).

**$^{13}C\{^1H\}$  NMR** (101 MHz,  $CDCl_3$ )  $\delta$  172.2, 171.9, 147.4, 147.2, 132.8, 112.5, 112.1, 108.7, 101.7, 96.5, 64.4, 60.2, 52.9, 52.9, 52.9, 47.6, 41.2, 37.9, 22.0, 19.4.

**HRMS** (ESI)  $m/z$   $[M + H]^+$  calcd for  $C_{20}H_{22}BrO_7$  453.0543, found 453.0545.

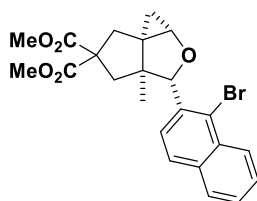

**Chemical Formula:**  $C_{23}H_{23}BrO_5$   
**Exact Mass:** 458,0729

**Dimethyl-3-(1-bromonaphthalen-2-yl)-3a-methyltetrahydro-3H-cyclopenta[c]cyclopropa[b]furan-5,5(6H)-dicarboxylate (2q)**

Prepared according to GP A using 1.11 mmol of **1b** (0.181 g, 0.394 mmol, 35%)

**$^1H$  NMR** (400 MHz,  $CDCl_3$ )  $\delta$  8.32 (d,  $J = 8.5$  Hz, 1H), 7.78 (dd,  $J = 17.2, 8.3$  Hz, 2H), 7.64 – 7.47 (m, 3H), 6.05 (s, 1H), 3.90 (d,  $J = 1.3$  Hz, 3H), 3.76 (d,  $J = 1.4$  Hz, 3H), 3.68 (d,  $J = 14.3$  Hz, 1H), 2.49 (d,  $J = 13.3$  Hz, 1H), 2.31 – 2.13 (m, 2H), 1.18 (d,  $J = 6.3$  Hz, 1H), 0.89 (t,  $J = 5.8$  Hz, 1H), 0.70 (s, 3H).

**$^{13}C\{^1H\}$  NMR** (101 MHz,  $CDCl_3$ )  $\delta$  172.4, 172.1, 137.8, 134.2, 132.2, 128.2, 127.6, 127.5, 127.3, 126.6, 126.0, 122.1, 97.4, 65.0, 60.4, 53.5, 53.1, 53.0, 48.0, 41.4, 38.0, 22.4, 19.4.

**HRMS** (ESI)  $m/z$   $[M + H]^+$  calcd for  $C_{23}H_{24}BrO_5$  459.0802, found 459.0803.

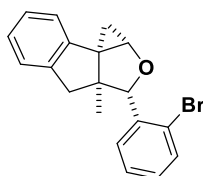

**Chemical Formula:**  $C_{19}H_{17}BrO$   
**Exact Mass:** 340,0463

**3-(2-bromophenyl)-3a-methyl-1,1a,3a,4-tetrahydro-3H-cyclopropa[b]indeno[1,2-c]furan (2r)**

Prepared according to GP A using 1.75 mmol of **1d** (0.338 g, 0.938 mmol, 54%)

**<sup>1</sup>H NMR** (400 MHz, CDCl<sub>3</sub>) δ 7.55 (ddd, *J* = 7.9, 6.3, 1.5 Hz, 2H), 7.33 (td, *J* = 7.6, 1.3 Hz, 1H), 7.25 – 7.10 (m, 4H), 6.76 (dd, *J* = 6.4, 2.0 Hz, 1H), 5.83 (s, 1H), 4.05 (dd, *J* = 4.9, 2.0 Hz, 1H), 3.90 (d, *J* = 16.9 Hz, 1H), 3.07 (d, *J* = 16.9 Hz, 1H), 1.57 (dd, *J* = 6.8, 2.0 Hz, 1H), 1.43 (dd, *J* = 6.8, 5.0 Hz, 1H), 0.79 (s, 3H).

**<sup>13</sup>C{<sup>1</sup>H} NMR** (101 MHz, CDCl<sub>3</sub>) δ 143.0, 141.8, 139.6, 132.8, 128.9, 128.9, 127.2, 126.9, 126.8, 124.9, 122.1, 119.3, 97.6, 65.4, 55.6, 48.8, 47.5, 21.4, 20.8.

**HRMS** (ESI) *m/z* [M + H]<sup>+</sup> calcd for C<sub>19</sub>H<sub>18</sub>BrO 341.0536, found 341.0535

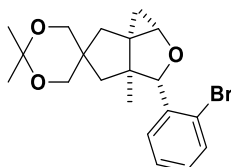

**Chemical Formula:** C<sub>20</sub>H<sub>25</sub>BrO<sub>3</sub>

**Exact Mass:** 392,0987

### 3-(2-bromophenyl)-2',2',3a-trimethyltetrahydro-3H,6H-spiro[cyclopenta[c]cyclopropa[b]furan-5,5'-[1,3]dioxane] (2s)

Prepared according to GP A using 3.36 mmol of **1e** (0.263 g, 0.669 mmol, 20%)

**<sup>1</sup>H NMR** (400 MHz, CDCl<sub>3</sub>) δ 7.47 (dd, *J* = 8.0, 1.3 Hz, 1H), 7.41 (dd, *J* = 7.8, 1.8 Hz, 1H), 7.29 – 7.25 (m, 1H), 7.08 (td, *J* = 7.5, 1.6 Hz, 1H), 5.65 (s, 1H), 4.11 (dd, *J* = 11.4, 2.0 Hz, 1H), 4.00 – 3.91 (m, 2H), 3.82 (d, *J* = 11.3 Hz, 1H), 3.54 (dd, *J* = 11.4, 2.0 Hz, 1H), 2.54 (d, *J* = 14.4 Hz, 1H), 2.01 – 1.77 (m, 2H), 1.46 (d, *J* = 11.1 Hz, 4H), 1.42 (s, 3H), 1.01 (dd, *J* = 6.5, 1.6 Hz, 1H), 0.73 (dd, *J* = 6.5, 5.0 Hz, 1H), 0.66 (s, 3H).

**<sup>13</sup>C{<sup>1</sup>H} NMR** (101 MHz, CDCl<sub>3</sub>) δ 138.8, 131.7, 127.8, 127.8, 126.1, 121.1, 97.0, 96.7, 69.3, 67.8, 64.3, 52.0, 47.2, 42.3, 40.5, 37.2, 26.1, 21.6, 19.9, 17.2.

**HRMS** (ESI) *m/z* [M + H]<sup>+</sup> calcd for C<sub>20</sub>H<sub>26</sub>BrO<sub>3</sub> 393.1060, found 393.1059

### 2.1.3 Synthesis of 3-(2-bromophenyl)-3a-methyltetrahydro-2'H,3H,6H-spiro[cyclopenta[c]cyclopropa[b]furan-5,5'-pyrimidine]-2',4',6'(1'H,3'H)-trione (2t):

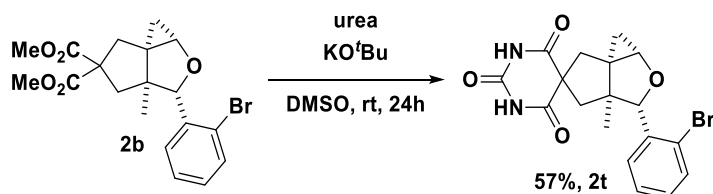

To a solution of **2b** (200.0 mg, 0.488 mmol, 1.0 eq.) in DMSO (0.5 mL, 1.0 M), urea (2.930 mmol, 6 eq.) and KO<sup>t</sup>Bu (1.080 mmol, 2.2 eq.) were added and the mixture was stirred at room temperature for 2 h. Afterwards, the mixture was diluted with EtOAc and washed with HCl (0.1 M). The aqueous phase was extracted with EtOAc, the combined organic layers were dried over MgSO<sub>4</sub> and evaporated under reduced pressure. The crude mixture was purified by silica gel chromatography. (112 mg, 0.276 mmol, 57% yield)

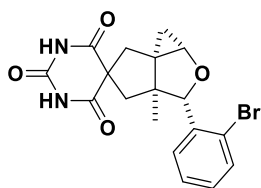

Chemical Formula: C<sub>18</sub>H<sub>17</sub>BrN<sub>2</sub>O<sub>4</sub>

Exact Mass: 404,0372

**(2-bromophenyl)-3a-methyltetrahydro-2'H,3H,6H-spiro[cyclopenta[c]cyclopropa[b]furan-5,5'-pyrimidine]-2',4',6'(1'H,3'H)-trione (2t)**

<sup>1</sup>H NMR (400 MHz, Acetone-*d*<sub>6</sub>) δ 10.09 (s, 2H), 7.54 (ddd, *J* = 14.4, 7.9, 1.5 Hz, 2H), 7.38 (ddd, *J* = 8.3, 7.4, 1.3 Hz, 1H), 7.20 (td, *J* = 7.7, 1.8 Hz, 1H), 6.08 (s, 1H), 3.97 (dd, *J* = 4.9, 1.7 Hz, 1H), 3.28 (d, *J* = 14.3 Hz, 1H), 2.83 (d, *J* = 13.4 Hz, 1H), 2.63 (d, *J* = 13.5 Hz, 1H), 2.51 (d, *J* = 14.3 Hz, 1H), 2.21 (d, *J* = 13.6 Hz, 1H), 1.08 (dd, *J* = 6.5, 1.8 Hz, 1H), 0.81 (dd, *J* = 6.5, 4.8 Hz, 1H), 0.78 (s, 3H).

<sup>13</sup>C{<sup>1</sup>H} NMR (101 MHz, Acetone-*d*<sub>6</sub>) δ 178.9, 178.0, 154.9, 145.7, 137.6, 134.2, 134.1, 132.4, 126.8, 101.8, 70.2, 62.8, 59.5, 55.2, 47.6, 46.6, 26.7, 23.2.

HRMS (ESI) *m/z* [M + H]<sup>+</sup> calcd for C<sub>18</sub>H<sub>18</sub>BrN<sub>2</sub>O<sub>4</sub> 405.0444, found 405.0445.

**2.1.4 Synthesis of 3-(2-bromophenyl)-3a-methyltetrahydro-3H-cyclopenta[c]cyclopropa[b]furan-5,5(6H)-dicarboxylic acid (2u)**

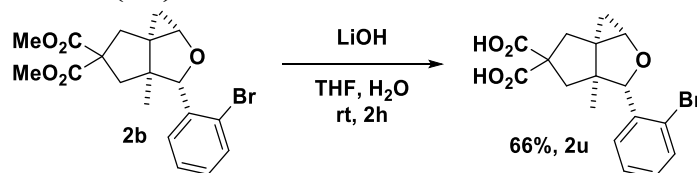

To a solution of **2b** (500.0 mg, 1.22 mmol, 1.0 eq.) in THF (20.0 mL) and H<sub>2</sub>O (6.0 mL) was added LiOH (4.9 mmol, 4 eq.). The mixture was stirred at 25 °C for 5 h and then poured into water (25 mL). After acidifying with diluted aqueous HCl solution, the precipitate was collected by filtration and washed with H<sub>2</sub>O to give **2u** (306 mg, 0.803 mmol, 66%)

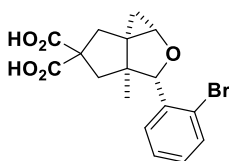

Chemical Formula: C<sub>17</sub>H<sub>17</sub>BrO<sub>5</sub>

Exact Mass: 380,0259

**3-(2-bromophenyl)-3a-methyltetrahydro-3H-cyclopenta[c]cyclopropa[b]furan-5,5(6H)-dicarboxylic acid (2u)**

<sup>1</sup>H NMR (400 MHz, Acetone-*d*<sub>6</sub>) δ 11.37 (s, 2H), 7.56 (dd, *J* = 8.0, 1.3 Hz, 1H), 7.48 (dd, *J* = 7.9, 1.8 Hz, 1H), 7.35 (td, *J* = 7.6, 1.3 Hz, 1H), 7.18 (td, *J* = 7.6, 1.8 Hz, 1H), 5.84 (s, 1H), 3.90 – 3.77 (m, 1H), 3.64 – 3.54 (m, 1H), 2.48 (dd, *J* = 13.3, 0.8 Hz, 1H), 2.24 (dd, *J* = 13.3, 1.5 Hz, 1H), 2.20 (d, *J* = 14.2 Hz, 1H), 1.08 (dd, *J* = 6.4, 1.7 Hz, 1H), 0.86 (dd, *J* = 6.4, 4.8 Hz, 1H), 0.68 (s, 3H).

<sup>13</sup>C{<sup>1</sup>H} NMR (101 MHz, Acetone-*d*<sub>6</sub>) δ 173.5, 172.9, 141.0, 133.5, 130.2, 129.9, 128.0, 122.4, 97.5, 65.5, 60.8, 53.8, 48.9, 42.4, 38.5, 22.6, 19.5.

HRMS (ESI) *m/z* [M + H]<sup>+</sup> calcd for C<sub>17</sub>H<sub>18</sub>BrO<sub>5</sub> 381.0332, found 381.0331.

## 2.2 General procedure for Pd-catalyzed C-H Activation

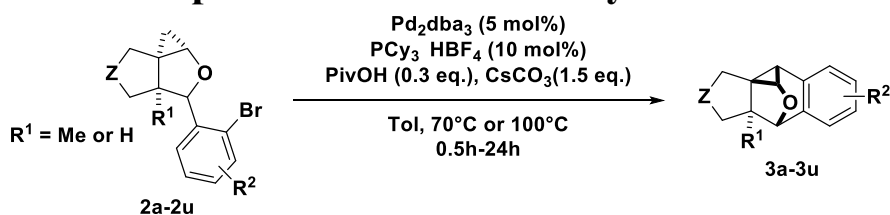

General procedure B: To a Schlenk tube was successively added the Pd complex (4.58 mg, 0.005 mmol, 5 mol%), the phosphine ligand (7.4 mg, 0.020 mmol, 10 mol%), PivOH (3.1 mg, 0.030 mmol, 0.3 eq.), the base (48.9 mg, 0.150 mmol, 1.5 eq.) and the cyclopropane derivative (0.1 mmol, 1.0 eq.). The tube was then placed under Argon (3 times vacuum/argon exchange). Then Tol. (1 mL, 0.1 M) was added, and the tube was placed in a pre-heated oil bath at the indicated temperature. After TLC monitoring, the reaction mixture was filtered through a short pad of silica with a 1:1 petroleum ether/EtOAc mixture as the eluting solvent. The desired product was obtained using a Tol/Et<sub>2</sub>O mixture as the eluant.

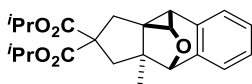

Chemical Formula: C<sub>23</sub>H<sub>28</sub>O<sub>5</sub>  
 Exact Mass: 384,1937

### Diisopropyl-4a-methyl-4,4a,5,9b-tetrahydro-1H-1,5-epoxycyclopenta[b]cyclopropa[a]naphthalene-3,3(2H)-dicarboxylate (3a)

Prepared according to GP B (70°C) using 0.1 mmol of **2a** (0.037 g, 0.096 mmol, 96%)

<sup>1</sup>H NMR (400 MHz, CDCl<sub>3</sub>) δ 7.29 – 7.21 (m, 2H), 7.16 (td, *J* = 7.1, 1.9 Hz, 1H), 7.07 (dd, *J* = 7.2, 1.3 Hz, 1H), 5.07 (heptd, *J* = 6.3, 4.5 Hz, 2H), 4.71 (s, 1H), 3.80 (d, *J* = 5.3 Hz, 1H), 2.57 – 2.44 (m, 3H), 2.37 (d, *J* = 13.3 Hz, 1H), 2.19 (d, *J* = 13.3 Hz, 1H), 1.30 – 1.21 (m, 12H), 0.49 (s, 3H).

<sup>13</sup>C{<sup>1</sup>H} NMR (101 MHz, CDCl<sub>3</sub>) δ 172.0, 171.8, 134.2, 132.7, 127.7, 126.7, 125.0, 124.3, 82.9, 69.2, 69.1, 61.4, 59.0, 47.9, 40.4, 35.7, 32.5, 22.2, 21.7, 21.6, 21.6, 15.9.

HRMS (ESI) *m/z* [M + H]<sup>+</sup> calcd for C<sub>23</sub>H<sub>29</sub>O<sub>5</sub> 385.2010, found 385.2012.

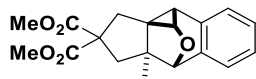

Chemical Formula: C<sub>19</sub>H<sub>20</sub>O<sub>5</sub>  
 Exact Mass: 328,1311

### Dimethyl-4a-methyl-4,4a,5,9b-tetrahydro-1H-1,5-epoxycyclopenta[b]cyclopropa[a]naphthalene-3,3(2H)-dicarboxylate (3b)

Prepared according to GP B (70°C) using 0.1 mmol of **2b** (0.032 g, 0.097 mmol, 97%)

<sup>1</sup>H NMR (400 MHz, CDCl<sub>3</sub>) δ 7.29 – 7.21 (m, 2H), 7.16 (td, *J* = 7.1, 1.9 Hz, 1H), 7.10 – 7.03 (m, 1H), 4.71 (s, 1H), 3.80 (d, *J* = 5.3 Hz, 1H), 3.76 (d, *J* = 7.1 Hz, 6H), 2.58 (d, *J* = 13.5 Hz, 1H), 2.54 – 2.48 (m, 2H), 2.40 (d, *J* = 13.3 Hz, 1H), 2.23 (d, *J* = 13.4 Hz, 1H), 0.48 (s, 3H).

<sup>13</sup>C{<sup>1</sup>H} NMR (101 MHz, CDCl<sub>3</sub>) δ 172.4, 172.0, 137.7, 131.8, 129.4, 128.5, 128.5, 126.5, 94.8, 64.5, 60.3, 53.0, 52.9, 52.8, 47.3, 41.4, 38.1, 21.9, 19.7.

HRMS (ESI) *m/z* [M + H]<sup>+</sup> calcd for C<sub>19</sub>H<sub>21</sub>O<sub>5</sub> 329.1384, found 329.1383.

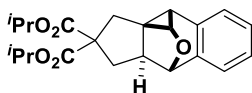

Chemical Formula:  $C_{22}H_{26}O_5$   
Exact Mass: 370,1780

### Diisopropyl-4,4a,5,9b-tetrahydro-1H-1,5-epoxycyclopenta[b]cyclopropa[a]naphthalene-3,3(2H)-dicarboxylate (3c)

Prepared according to GP B (70°C) using 0.1 mmol of **2c** (0.027 g, 0.072 mmol, 72%)

$^1H$  NMR (400 MHz,  $CDCl_3$ )  $\delta$  7.29 – 7.20 (m, 2H), 7.14 (td,  $J = 7.1, 1.9$  Hz, 1H), 7.08 – 7.04 (m, 1H), 5.04 (dp,  $J = 23.4, 6.3$  Hz, 2H), 4.86 (s, 1H), 3.84 (d,  $J = 5.3$  Hz, 1H), 2.59 (d,  $J = 13.8$  Hz, 1H), 2.55 – 2.50 (m, 2H), 2.47 (d,  $J = 13.7$  Hz, 1H), 1.91 – 1.75 (m, 2H), 1.27 – 1.18 (m, 12H).

$^{13}C\{^1H\}$  NMR (101 MHz,  $CDCl_3$ )  $\delta$  170.8, 170.4, 134.6, 131.8, 126.9, 125.8, 124.1, 121.8, 78.2, 68.1, 61.6, 57.2, 45.3, 33.1, 32.4, 32.2, 21.2, 20.7, 20.7, 20.6.

HRMS (ESI)  $m/z$   $[M + H]^+$  calcd for  $C_{22}H_{27}O_5$  371.1853, found 371.1855.

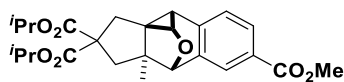

Chemical Formula:  $C_{25}H_{30}O_7$   
Exact Mass: 442,1992

### 3,3-diisopropyl-7-methyl-4a-methyl-4,4a,5,9b-tetrahydro-1H-1,5-epoxycyclopenta[b]cyclopropa[a]naphthalene-3,3,7(2H)-tricarboxylate (3d)

Prepared according to GP B (70°C) using 0.1 mmol of **2d** (0.035 g, 0.079 mmol, 79%)

$^1H$  NMR (400 MHz,  $CDCl_3$ )  $\delta$  7.93 (dd,  $J = 7.9, 1.7$  Hz, 1H), 7.75 (d,  $J = 1.7$  Hz, 1H), 7.32 (d,  $J = 7.9$  Hz, 1H), 5.05 (pd,  $J = 6.3, 5.2$  Hz, 2H), 4.76 (s, 1H), 3.89 (s, 3H), 3.86 (d,  $J = 5.2$  Hz, 1H), 2.57 – 2.42 (m, 3H), 2.39 – 2.30 (m, 1H), 2.17 (d,  $J = 13.4$  Hz, 1H), 1.29 – 1.16 (m, 12H), 0.46 (s, 3H).

$^{13}C\{^1H\}$  NMR (101 MHz,  $CDCl_3$ )  $\delta$  171.8, 171.5, 167.2, 138.5, 134.0, 129.1, 126.8, 126.7, 125.3, 82.5, 69.1, 69.1, 61.1, 59.7, 52.0, 47.7, 40.1, 36.5, 32.2, 22.7, 21.5, 21.5, 21.5, 15.8.

HRMS (ESI)  $m/z$   $[M + H]^+$  calcd for  $C_{25}H_{31}O_7$  443.2064, found 443.2066.

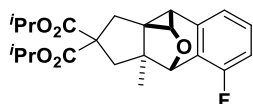

Chemical Formula:  $C_{23}H_{27}FO_5$   
Exact Mass: 402,1843

### Diisopropyl-6-fluoro-4a-methyl-4,4a,5,9b-tetrahydro-1H-1,5-epoxycyclopenta[b]cyclopropa[a]naphthalene-3,3(2H)-dicarboxylate (3f)

Prepared according to GP B (100°C) using 0.1 mmol of **2f** (0.024 g, 0.060 mmol, 60%)

$^1H$  NMR (400 MHz,  $CDCl_3$ )  $\delta$  7.16 (ddd,  $J = 8.3, 7.5, 5.6$  Hz, 1H), 7.04 (d,  $J = 7.4$  Hz, 1H), 6.92 – 6.82 (m, 1H), 5.16 (s, 1H), 5.06 (pd,  $J = 6.2, 3.3$  Hz, 2H), 3.81 (d,  $J = 5.3$  Hz, 1H), 2.53 – 2.44 (m, 3H), 2.38 (d,  $J = 13.4$  Hz, 1H), 2.18 (d,  $J = 13.4$  Hz, 1H), 1.28 – 1.20 (m, 12H), 0.54 (s, 3H).

$^{19}F\{^1H\}$  NMR (376 MHz,  $CDCl_3$ )  $\delta$  -127.2

$^{13}C\{^1H\}$  NMR (101 MHz,  $CDCl_3$ )  $\delta$  172.0, 171.7, 159.2, 156.8, 135.58 (d,  $J = 6.0$  Hz), 128.63 (d,  $J = 8.1$  Hz), 122.41 (d,  $J = 3.1$  Hz), 120.99 (d,  $J = 18.7$  Hz), 112.04 (d,  $J = 21.6$  Hz), 75.9, 75.9, 69.3, 69.2, 61.3, 59.3, 47.6, 40.2, 36.0, 32.3, 22.1, 22.1, 21.7, 21.7, 21.6, 15.6.

HRMS (ESI)  $m/z$   $[M + H]^+$  calcd for  $C_{23}H_{28}FO_5$  403.1915, found 403.1916.

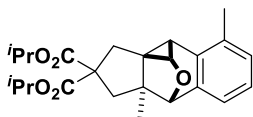

Chemical Formula: C<sub>24</sub>H<sub>30</sub>O<sub>5</sub>  
Exact Mass: 398,2093

**Diisopropyl-4a,9-dimethyl-4,4a,5,9b-tetrahydro-1H-1,5-epoxycyclopenta[b]cyclopropa[a]naphthalene-3,3(2H)-dicarboxylate (3g)**

Prepared according to GP B (100°C) using 0.1 mmol of **2g** (0.024 g, 0.060 mmol, 60%)

<sup>1</sup>H NMR (400 MHz, CDCl<sub>3</sub>) δ 7.14 – 7.07 (m, 1H), 7.03 (t, *J* = 7.4 Hz, 1H), 6.90 (dd, *J* = 7.3, 1.4 Hz, 1H), 5.05 (hd, *J* = 6.2, 4.7 Hz, 2H), 4.67 (s, 1H), 3.80 (d, *J* = 5.3 Hz, 1H), 2.60 (d, *J* = 5.4 Hz, 1H), 2.56 – 2.42 (m, 2H), 2.35 (d, *J* = 16.2 Hz, 4H), 2.18 (d, *J* = 13.3 Hz, 1H), 1.28 – 1.20 (m, 12H), 0.47 (s, 3H).

<sup>13</sup>C{<sup>1</sup>H} NMR (101 MHz, CDCl<sub>3</sub>) δ 172.1, 171.9, 134.5, 133.9, 130.6, 129.4, 124.5, 122.3, 83.1, 69.1, 69.1, 61.4, 59.3, 47.6, 40.3, 35.7, 32.7, 21.7, 21.7, 21.6, 18.9, 18.5, 16.0.

HRMS (ESI) *m/z* [M + H]<sup>+</sup> calcd for C<sub>24</sub>H<sub>31</sub>O<sub>5</sub> 399.2166, found 399.2163.

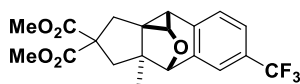

Chemical Formula: C<sub>20</sub>H<sub>19</sub>F<sub>3</sub>O<sub>5</sub>  
Exact Mass: 396,1185

**Dimethyl-4a-methyl-7-(trifluoromethyl)-4,4a,5,9b-tetrahydro-1H-1,5-epoxycyclopenta[b]cyclopropa[a]naphthalene-3,3(2H)-dicarboxylate (3i)**

Prepared according to GP B (100°C) using 0.1 mmol of **2i** (0.028 g, 0.072 mmol, 72%)

<sup>1</sup>H NMR (400 MHz, CDCl<sub>3</sub>) δ 7.50 (d, *J* = 7.8 Hz, 1H), 7.37 (d, *J* = 7.7 Hz, 1H), 7.33 (s, 1H), 4.77 (s, 1H), 3.87 (d, *J* = 5.2 Hz, 1H), 3.80 – 3.72 (m, 5H), 2.61 – 2.54 (m, 2H), 2.50 (d, *J* = 13.5 Hz, 1H), 2.42 (d, *J* = 13.5 Hz, 1H), 2.23 (d, *J* = 13.4 Hz, 1H), 0.48 (s, 2H).

<sup>19</sup>F{<sup>1</sup>H} NMR (376 MHz, CDCl<sub>3</sub>) δ -61.88.

<sup>13</sup>C{<sup>1</sup>H} NMR (101 MHz, CDCl<sub>3</sub>) δ 172.8, 172.6, 137.0, 136.9, 134.4, 127.39 (q, *J* = 32.3 Hz), 127.1, 124.77 (q, *J* = 3.9 Hz), 124.5 (q, *J* = 272.8 Hz), 121.16 (q, *J* = 3.8 Hz), 82.5, 61.0, 59.4, 53.2, 53.1, 47.7, 40.3, 36.3, 32.4, 22.4, 15.9.

HRMS (ESI) *m/z* [M + H]<sup>+</sup> calcd for C<sub>20</sub>H<sub>20</sub>F<sub>3</sub>O<sub>5</sub> 397.1257, found 397.1257.

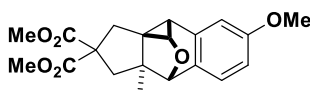

Chemical Formula: C<sub>20</sub>H<sub>22</sub>O<sub>6</sub>  
Exact Mass: 358,1416

**Dimethyl-8-methoxy-4a-methyl-4,4a,5,9b-tetrahydro-1H-1,5-epoxycyclopenta[b]cyclopropa[a]naphthalene-3,3(2H)-dicarboxylate (3j)**

Prepared according to GP B (100°C) using 0.1 mmol of **2j** (0.011 g, 0.030 mmol, 53%)

<sup>1</sup>H NMR (400 MHz, CDCl<sub>3</sub>) δ 6.98 (d, *J* = 8.1 Hz, 1H), 6.84 (d, *J* = 2.5 Hz, 1H), 6.68 (dd, *J* = 8.1, 2.5 Hz, 1H), 4.66 (s, 1H), 3.79 (s, 3H), 3.76 (s, 4H), 3.75 (s, 3H), 2.60 – 2.46 (m, 2H), 2.45 (d, *J* = 5.3 Hz, 1H), 2.36 (d, *J* = 5.2 Hz, 1H), 2.20 (d, *J* = 13.3 Hz, 1H), 0.49 (s, 3H).

<sup>13</sup>C{<sup>1</sup>H} NMR (101 MHz, CDCl<sub>3</sub>) δ 173.0, 172.8, 159.5, 134.0, 129.2, 128.4, 126.8, 125.3, 112.9, 110.0, 82.5, 61.0, 58.8, 55.4, 53.1, 53.1, 48.4, 40.6, 36.0, 32.7, 22.6, 16.1.

HRMS (ESI) *m/z* [M + H]<sup>+</sup> calcd for C<sub>20</sub>H<sub>23</sub>O<sub>6</sub> 359.1489, found 359.1490.

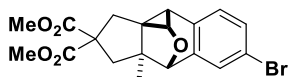

Chemical Formula:  $C_{19}H_{19}BrO_5$   
Exact Mass: 406,0416

**Dimethyl-7-bromo-4a-methyl-4,4a,5,9b-tetrahydro-1H-1,5-epoxycyclopenta[b]cyclopropa[a]naphthalene-3,3(2H)-dicarboxylate (3l)**

Prepared according to GP B (100°C) using 0.1 mmol of **2l** (0.019 g, 0.047 mmol, 47%)

$^1H$  NMR (400 MHz,  $CDCl_3$ )  $\delta$  7.37 (dd,  $J = 8.0, 2.0$  Hz, 1H), 7.22 (d,  $J = 2.0$  Hz, 1H), 7.14 (d,  $J = 8.0$  Hz, 1H), 4.66 (s, 1H), 3.81 (d,  $J = 5.3$  Hz, 1H), 3.76 (d,  $J = 5.3$  Hz, 6H), 2.63 – 2.44 (m, 3H), 2.39 (d,  $J = 13.3$  Hz, 1H), 2.20 (d,  $J = 13.4$  Hz, 1H), 0.49 (s, 3H).

$^{13}C\{^1H\}$  NMR (101 MHz,  $CDCl_3$ )  $\delta$  172.9, 172.6, 135.9, 131.7, 130.7, 128.4, 127.5, 118.8, 82.3, 61.0, 59.1, 53.2, 53.1, 47.9, 40.4, 35.9, 32.5, 21.9, 16.0.

HRMS (ESI)  $m/z$   $[M + H]^+$  calcd for  $C_{19}H_{20}BrO_5$  407.0489, found 407.0490.

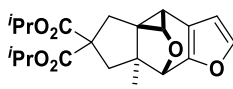

Chemical Formula:  $C_{21}H_{26}O_6$   
Exact Mass: 374,1729

**Dimethyl-4a-methyl-4,4a,5,8b-tetrahydro-1H-1,5-epoxycyclopropa[7,7a]indeno[5,6-b]furan-3,3(2H)-dicarboxylate (3n)**

Prepared according to GP B (100°C) using 0.1 mmol of **2n** (0.009 g, 0.024 mmol, 24%)

$^1H$  NMR (400 MHz,  $CDCl_3$ )  $\delta$  7.32 (dd,  $J = 1.8, 0.8$  Hz, 1H), 6.28 (dd,  $J = 3.2, 1.8$  Hz, 1H), 6.17 (d,  $J = 3.2$  Hz, 1H), 5.19 (s, 1H), 5.14 (p,  $J = 6.2$  Hz, 1H), 5.04 (p,  $J = 6.2$  Hz, 1H), 3.81 (dd,  $J = 5.1, 1.7$  Hz, 1H), 2.82 (dd,  $J = 14.2, 1.4$  Hz, 1H), 2.40 (d,  $J = 13.5$  Hz, 1H), 2.24 (dd,  $J = 13.6, 1.4$  Hz, 1H), 2.18 (d,  $J = 14.1$  Hz, 1H), 1.33 – 1.17 (m, 12H), 0.81 (s, 3H).

$^{13}C\{^1H\}$  NMR (101 MHz,  $CDCl_3$ )  $\delta$  171.4, 171.1, 152.4, 142.0, 110.0, 107.3, 92.0, 69.3, 64.8, 60.3, 52.9, 46.0, 40.6, 37.9, 21.7, 21.7, 21.6, 20.2, 19.8.

HRMS (ESI)  $m/z$   $[M + H]^+$  calcd for  $C_{21}H_{28}O_6$  377.1959, found 377.1952

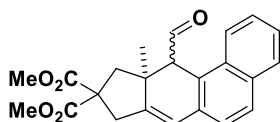

Chemical Formula:  $C_{23}H_{22}O_5$   
Exact Mass: 378,1467

**Dimethyl-7-formyl-7a-methyl-7,7a,8,10-tetrahydro-9H-cyclopenta[b]phenanthrene-9,9-dicarboxylate (4q)**

Prepared according to GP B (100°C) using 0.1 mmol of **2q** (0.009 mg, 0.024 mmol, 24%)

Only major diastereomers is described here (cis:trans 1:5).

$^1H$  NMR (400 MHz,  $CDCl_3$ )  $\delta$  9.36 (d,  $J = 5.1$  Hz, 1H), 8.11 (d,  $J = 8.6$  Hz, 1H), 7.81 (dd,  $J = 8.0, 1.6$  Hz, 1H), 7.69 (d,  $J = 8.3$  Hz, 1H), 7.51 (dddd,  $J = 19.9, 8.0, 6.8, 1.4$  Hz, 2H), 7.24 (d,  $J = 8.3$  Hz, 1H), 7.09 (t,  $J = 2.1$  Hz, 1H), 3.79 (s, 3H), 3.75 (s, 3H), 3.45 (dd,  $J = 17.6, 2.7$  Hz, 1H), 3.38 (d,  $J = 5.1$  Hz, 1H), 3.30 – 3.22 (m, 1H), 2.73 – 2.51 (m, 2H), 1.10 (s, 3H).

$^{13}C\{^1H\}$  NMR (101 MHz,  $CDCl_3$ )  $\delta$  200.4, 172.3, 172.1, 149.0, 133.9, 129.8, 129.4, 128.6, 127.8, 127.7, 126.5, 126.0, 125.6, 122.9, 114.2, 62.9, 59.5, 53.1, 43.6, 43.3, 38.8, 24.8.

HRMS (ESI)  $m/z$   $[M + H]^+$  calcd for  $C_{23}H_{23}O_5$  379.1540, found 379.1541.



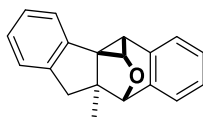

Chemical Formula: C<sub>19</sub>H<sub>16</sub>O

Exact Mass: 260,1201

### 6a-methyl-1a,6,6a,7-tetrahydro-1H-1,6-epoxybenzo[*b*]cyclopropa[*d*]fluorene (3r)

Prepared according to GP B (100°C) using 0.1 mmol of **2r** (0.008 g, 0.032 mmol, 45%)

<sup>1</sup>H NMR (400 MHz, CDCl<sub>3</sub>) δ 7.39 (dd, *J* = 7.4, 1.2 Hz, 1H), 7.31 (td, *J* = 7.5, 1.4 Hz, 1H), 7.21 (qd, *J* = 7.7, 1.2 Hz, 2H), 7.18 – 7.10 (m, 3H), 7.00 (dd, *J* = 6.7, 1.7 Hz, 1H), 4.97 (s, 1H), 3.87 (d, *J* = 5.3 Hz, 1H), 3.23 (d, *J* = 14.4 Hz, 1H), 3.15 (d, *J* = 5.3 Hz, 1H), 2.48 (d, *J* = 14.4 Hz, 1H), 0.54 (s, 3H).

<sup>13</sup>C{<sup>1</sup>H} NMR (101 MHz, CDCl<sub>3</sub>) 145.1, 139.4, 135.0, 131.5, 128.0, 126.9, 126.7, 126.2, 125.5, 125.4, 124.2, 120.1, 82.6, 62.0, 54.7, 40.6, 39.5, 23.5, 17.0.

HRMS (ESI) *m/z* [M + H]<sup>+</sup> calcd for C<sub>19</sub>H<sub>17</sub>O 261.1274, found 261.1275.

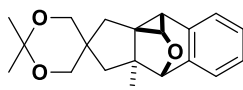

Chemical Formula: C<sub>20</sub>H<sub>24</sub>O<sub>3</sub>

Exact Mass: 312,1725

### 2,2,4a'-trimethyl-4',4a',5',9b'-tetrahydro-1'H,2'H-spiro[[1,3]dioxane-5,3'-[1,5]epoxycyclopenta[*b*]cyclopropa[*a*]naphthalene] (3s)

Prepared according to GP B (70°C) using 0.1 mmol of **2s** (0.015 g, 0.048 mmol, 68% (71%))

<sup>1</sup>H NMR (400 MHz, CDCl<sub>3</sub>) δ 7.29 – 7.19 (m, 2H), 7.15 (td, *J* = 7.2, 1.6 Hz, 1H), 7.05 (dd, *J* = 7.3, 1.3 Hz, 1H), 4.66 (s, 1H), 3.82 (d, *J* = 11.3 Hz, 1H), 3.78 – 3.70 (m, 3H), 3.65 (dd, *J* = 11.3, 2.0 Hz, 1H), 2.41 (d, *J* = 5.3 Hz, 1H), 2.01 (d, *J* = 1.9 Hz, 2H), 1.49 (d, *J* = 13.3 Hz, 1H), 1.43 (d, *J* = 14.5 Hz, 6H), 1.27 (d, *J* = 13.2 Hz, 1H), 0.46 (s, 3H).

<sup>13</sup>C{<sup>1</sup>H} NMR (101 MHz, CDCl<sub>3</sub>) δ 134.3, 132.9, 127.7, 126.9, 124.9, 124.3, 97.8, 83.3, 71.1, 70.4, 59.2, 46.7, 44.1, 39.4, 34.9, 32.7, 27.0, 21.3, 21.0, 17.9.

HRMS (ESI) *m/z* [M + H]<sup>+</sup> calcd for C<sub>20</sub>H<sub>25</sub>O<sub>3</sub> 313.1798, found 313.1799.

## 2.3 General procedure for One Pot C-H Activation/Thermal rearrangement.

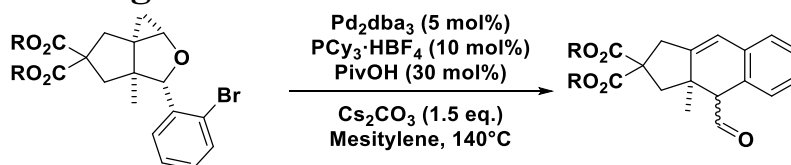

General procedure C: A 4 mL screw-cap vial equipped with a magnetic stir bar was charged with the starting material (0.195 mmol, 1.0 eq.), Pd complex (5 mol%), PCy<sub>3</sub>·HBF<sub>4</sub> (10 mol%), Cs<sub>2</sub>CO<sub>3</sub> (1.5 eq.) and PivOH (0.3 eq.). The vial was purged with argon, then dry and degassed mesitylene (0.2 M) was added. The resulting mixture was placed in a preheated bath at 140°C and stirred overnight. The reaction was then cooled to room temperature and filtered through a pad of silica. The crude product was purified by silica gel flash chromatography using an Tol/Et<sub>2</sub>O mixture as the eluant.

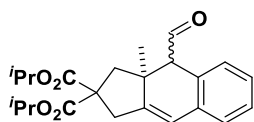

Chemical Formula: C<sub>23</sub>H<sub>28</sub>O<sub>5</sub>  
Exact Mass: 384,1937

### Diisopropyl-4-formyl-3a-methyl-1,3,3a,4-tetrahydro-2H-cyclopenta[b]naphthalene-2,2-dicarboxylate (4a)

Prepared according to GP C using 0.195 mmol of **2a** (0.052 mg, 0.135 mmol, 79%)

cis (minor product):

<sup>1</sup>H NMR (400 MHz, CDCl<sub>3</sub>) δ 10.18 (d, *J* = 4.1 Hz, 1H), 7.25 – 7.20 (m, 1H), 7.16 (td, *J* = 7.4, 1.5 Hz, 1H), 7.08 (dd, *J* = 7.3, 1.5 Hz, 2H), 6.25 (dd, *J* = 2.6, 1.4 Hz, 1H), 5.04 (dp, *J* = 14.8, 6.3 Hz, 2H), 3.70 (d, *J* = 4.1 Hz, 1H), 3.37 (dd, *J* = 17.2, 2.7 Hz, 1H), 2.94 (d, *J* = 17.3 Hz, 1H), 2.72 (d, *J* = 14.1 Hz, 1H), 2.28 (d, *J* = 14.0 Hz, 1H), 1.25 (s, 4H), 1.23 (t, *J* = 1.4 Hz, 7H), 1.22 (d, *J* = 2.7 Hz, 3H), 1.08 (s, 3H).

<sup>13</sup>C{<sup>1</sup>H} NMR (101 MHz, CDCl<sub>3</sub>) δ 204.3, 171.2, 171.1, 149.1, 134.0, 130.0, 127.7, 127.0, 126.5, 126.4, 118.6, 69.3, 69.3, 60.3, 59.7, 45.6, 44.6, 37.7, 21.6, 21.6, 21.5, 19.6.

trans (major product):

<sup>1</sup>H NMR (400 MHz, CDCl<sub>3</sub>) δ 9.35 (d, *J* = 5.3 Hz, 1H), 7.25 (dd, *J* = 7.4, 1.7 Hz, 1H), 7.18 – 7.14 (m, 1H), 7.13 – 7.09 (m, 2H), 6.31 (dd, *J* = 2.7, 1.4 Hz, 1H), 5.07 (dp, *J* = 20.7, 6.3 Hz, 2H), 3.36 (dd, *J* = 17.7, 2.6 Hz, 1H), 3.29 (d, *J* = 5.3 Hz, 1H), 3.07 (dd, *J* = 17.6, 1.4 Hz, 1H), 2.61 (d, *J* = 14.6 Hz, 1H), 2.45 (d, *J* = 14.6 Hz, 1H), 1.28 (d, *J* = 1.5 Hz, 3H), 1.26 (t, *J* = 1.8 Hz, 6H), 1.25 (d, *J* = 2.2 Hz, 3H), 1.09 (s, 3H).

<sup>13</sup>C{<sup>1</sup>H} NMR (101 MHz, CDCl<sub>3</sub>) δ 200.6, 171.4, 171.2, 148.1, 133.9, 130.1, 129.0, 128.7, 128.3, 128.2, 127.5, 126.4, 118.3, 69.5, 69.3, 62.3, 59.5, 43.8, 43.1, 38.0, 25.3, 21.5, 21.5, 21.4

HRMS (ESI) *m/z* [M + H]<sup>+</sup> calcd for C<sub>23</sub>H<sub>29</sub>O<sub>5</sub> 385.2010, found 385.2010.

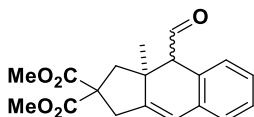

Chemical Formula: C<sub>19</sub>H<sub>20</sub>O<sub>5</sub>  
Exact Mass: 328,1311

### Dimethyl(trans)-4-formyl-3a-methyl-1,3,3a,4-tetrahydro-2H-cyclopenta[b]naphthalene-2,2-dicarboxylate (4b)

Prepared according to GP C using 0.195 mmol of **2b** (0.043 mg, 0.134 mmol, 83%)

cis (minor product):

<sup>1</sup>H NMR (400 MHz, CD<sub>2</sub>Cl<sub>2</sub>) δ 10.08 (d, *J* = 4.0 Hz, 1H), 7.18 – 7.12 (m, 1H), 7.09 (td, *J* = 7.6, 1.5 Hz, 1H), 7.02 (dd, *J* = 7.4, 1.5 Hz, 2H), 6.19 (dd, *J* = 2.6, 1.4 Hz, 1H), 3.65 (s, 3H), 3.63 (s, 3H), 3.56 (d, *J* = 4.0 Hz, 1H), 3.31 – 3.25 (m, 1H), 2.92 (d, *J* = 17.3 Hz, 1H), 2.62 (d, *J* = 14.1 Hz, 1H), 2.26 (d, *J* = 14.1 Hz, 1H), 0.97 (s, 3H).

<sup>13</sup>C{<sup>1</sup>H} NMR (101 MHz, CD<sub>2</sub>Cl<sub>2</sub>) δ 203.9, 172.0, 148.9, 134.0, 130.0, 127.7, 126.9, 126.4, 126.4, 118.6, 60.3, 59.5, 45.6, 44.5, 37.6, 19.3.

trans (major product):

<sup>1</sup>H NMR (400 MHz, CD<sub>2</sub>Cl<sub>2</sub>) δ 9.21 (d, *J* = 5.0 Hz, 1H), 7.16 (dd, *J* = 7.4, 1.6 Hz, 1H), 7.10 – 7.05 (m, 1H), 7.02 (dd, *J* = 7.3, 1.5 Hz, 2H), 6.21 (dd, *J* = 2.7, 1.5 Hz, 1H), 3.66 (s, 3H), 3.62 (s, 3H), 3.26 (dd, *J* = 17.7, 2.7 Hz, 1H), 3.18 (d, *J* = 4.9 Hz, 1H), 3.03 – 2.95 (m, 1H), 2.53 (d, *J* = 14.5 Hz, 1H), 2.35 (d, *J* = 14.6 Hz, 1H), 0.95 (s, 3H).

<sup>13</sup>C{<sup>1</sup>H} NMR (101 MHz, CD<sub>2</sub>Cl<sub>2</sub>) δ 200.0, 172.2, 172.0, 148.0, 134.0, 130.0, 128.7, 128.5, 127.5, 126.4, 118.3, 62.1, 59.3, 43.7, 43.0, 38.0, 25.0.

HRMS (ESI) *m/z* [M + H]<sup>+</sup> calcd for C<sub>19</sub>H<sub>21</sub>O<sub>5</sub> 329.1384, found 329.1023.

## 2.4 Post-Functionalization Procedure

### 2.4.1 Synthesis of 4a-methyl-4,4a,5,9b-tetrahydro-1H-1,5-epoxycyclopenta[b]cyclopropa[a]naphthalene-3,3(2H)-dicarboxylic acid (5)

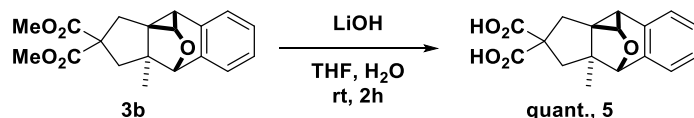

To a solution of **3b** (32.8 mg, 0.1 mmol, 1.0 eq.) in THF (1.5 mL) and H<sub>2</sub>O (0.5 mL) was added LiOH (9.6 mg, 0.4 mmol, 4 eq.). The mixture was stirred at 25 °C for 5 h and then poured into water (5mL). After acidifying with diluted aqueous HCl solution, the precipitate was collected by filtration and washed with H<sub>2</sub>O to give **5** (29.8 mg, 0.099 mmol, >99%).

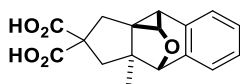

Chemical Formula: C<sub>17</sub>H<sub>16</sub>O<sub>5</sub>  
Exact Mass: 300,0998

### 4a-methyl-4,4a,5,9b-tetrahydro-1H-1,5-epoxycyclopenta[b]cyclopropa[a]naphthalene-3,3(2H)-dicarboxylic acid (5)

<sup>1</sup>H NMR (400 MHz, Acetone-*d*<sub>6</sub>) δ 7.31 (d, *J* = 7.4 Hz, 1H), 7.23 (td, *J* = 7.2, 2.0 Hz, 1H), 7.17 – 7.09 (m, 2H), 4.75 (s, 1H), 3.71 (d, *J* = 5.3 Hz, 1H), 2.62 – 2.49 (m, 3H), 2.36 – 2.27 (m, 2H), 0.47 (s, 3H).

<sup>13</sup>C{<sup>1</sup>H} NMR (101 MHz, Acetone-*d*<sub>6</sub>) δ 173.8, 173.6, 135.6, 134.0, 128.2, 127.3, 125.5, 125.0, 83.3, 61.4, 59.7, 48.5, 41.2, 36.3, 33.1, 22.6, 16.2.

HRMS (ESI) *m/z* [M + H]<sup>+</sup> calcd for C<sub>17</sub>H<sub>17</sub>O<sub>5</sub> 301.1071, found 301.1071.

### 2.4.2 Synthesis of 4a'-methyl-4',4a',5',9b'-tetrahydro-1'H,2H,2'H-spiro[pyrimidine-5,3'-[1,5]epoxycyclopenta[b]cyclopropa[a]naphthalene]-2,4,6(1H,3H)-trione (6)

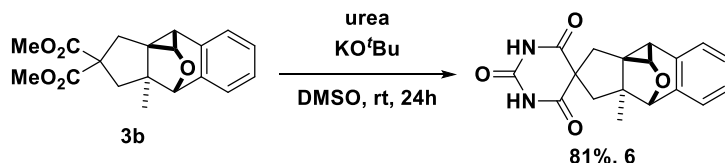

To a solution of **3b** (32,8 mg, 0.1 mmol, 1.0 eq.) in DMSO (0.2 mL, 1.0 M), urea (36.3 mg, 0.6mmol, 6 eq.) and KO<sup>t</sup>Bu ( 25.0 mg, 0.220 mmol, 2.2 eq.) were added and the mixture was stirred at room temperature for 2 h. Afterwards, the mixture was diluted with EtOAc and washed with HCl (0.1 M). The aqueous phase was extracted with EtOAc, the combined organic layers were dried over MgSO<sub>4</sub> and evaporated under reduced pressure. The crude mixture was purified by recrystallization (Acetone/Heptane). (26.4 mg, 0.081 mmol, 81% yield)

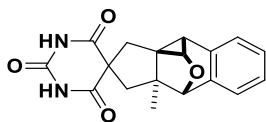

Chemical Formula: C<sub>18</sub>H<sub>16</sub>N<sub>2</sub>O<sub>4</sub>  
Exact Mass: 324,1110

#### 4a'-methyl-4',4a',5',9b'-tetrahydro-1'H,2H,2'H-spiro[pyrimidine-5,3'-[1,5]epoxycyclopenta[b]cyclopropa[a]naphthalene]-2,4,6(1H,3H)-trione (6)

<sup>1</sup>H NMR (400 MHz, DMSO-d<sub>6</sub>) δ 11.09 (s, 1H), 7.31 (d, *J* = 7.4 Hz, 1H), 7.22 (td, *J* = 7.3, 2.0 Hz, 1H), 7.12 (d, *J* = 7.4 Hz, 2H), 4.75 (s, 1H), 3.82 (d, *J* = 5.3 Hz, 1H), 3.30 (d, *J* = 9.2 Hz, 1H), 2.62 (s, 1H), 2.57 (d, *J* = 12.9 Hz, 1H), 2.16 (d, *J* = 12.9 Hz, 2H), 1.89 (d, *J* = 12.8 Hz, 1H), 0.51 (s, 3H).

<sup>13</sup>C{<sup>1</sup>H} NMR (101 MHz, DMSO-d<sub>6</sub>) δ 173.7, 173.6, 173.4, 173.3, 150.4, 134.4, 132.8, 127.2, 126.3, 124.5, 124.1, 81.8, 58.8, 57.5, 48.2, 42.9, 35.8, 32.6, 21.5, 15.6.

HRMS (ESI) *m/z* [M + H]<sup>+</sup> calcd for C<sub>18</sub>H<sub>17</sub>N<sub>2</sub>O<sub>4</sub> 325.1183, found 325.1182.

### 2.4.3 Synthesis of (4a-methyl-2,3,4,4a,5,9b-hexahydro-1H-1,5-epoxycyclopenta[b]cyclopropa[a]naphthalene-3,3-diyl)dimethanol (7)

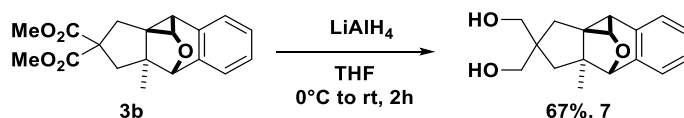

Lithium aluminum hydride (8.35 mg, 0.220 mmol, 2.2 equiv.) was stirred in dry THF (0.4 M) at 0°C. Then **3b** (32.84 mg, 0.1 mmol, 1 equiv.) was dissolved in THF (0.4 M) and added dropwise at 0°C. Then, the mixture was slowly warmed to room temperature until the completion of the reaction. It was then cooled to 0°C, and the reaction was worked up using the Fieser procedure.<sup>[6]</sup> Then crude was concentrated in vacuo and purified by flash column chromatography.

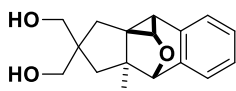

Chemical Formula: C<sub>17</sub>H<sub>20</sub>O<sub>3</sub>  
Exact Mass: 272,1412

#### (4a-methyl-2,3,4,4a,5,9b-hexahydro-1H-1,5-epoxycyclopenta[b]cyclopropa[a]naphthalene-3,3-diyl)dimethanol (7)

<sup>1</sup>H NMR (400 MHz, Acetone-d<sub>6</sub>) δ 7.28 (dd, *J* = 7.4, 1.3 Hz, 1H), 7.20 (td, *J* = 7.3, 1.7 Hz, 1H), 7.12 (td, *J* = 7.3, 1.3 Hz, 1H), 7.08 (dd, *J* = 7.3, 1.7 Hz, 1H), 4.64 (s, 1H), 3.88 (d, *J* = 5.4 Hz, 2H), 3.72 (d, *J* = 5.3 Hz, 1H), 3.67 – 3.60 (m, 4H), 2.84 (s, 1H), 2.42 (d, *J* = 5.3 Hz, 1H), 1.87 (d, *J* = 13.0 Hz, 1H), 1.69 (d, *J* = 13.0 Hz, 1H), 1.50 (d, *J* = 13.1 Hz, 1H), 1.38 (d, *J* = 13.1 Hz, 1H), 0.48 (s, 3H).

<sup>13</sup>C{<sup>1</sup>H} NMR (101 MHz, Acetone-d<sub>6</sub>) δ 136.1, 134.6, 128.0, 127.3, 125.2, 124.9, 84.1, 69.6, 69.2, 60.3, 52.2, 47.7, 38.9, 35.5, 22.0, 18.0.

HRMS (ESI) *m/z* [M + H]<sup>+</sup> calcd for C<sub>17</sub>H<sub>21</sub>O<sub>3</sub> 273.1485, found 273.14852.

## 2.4.4 Synthesis of methyl-12-methyl-2-oxo-7,11b-dihydro-2H,5H-4a,7,3-(epiethane[1,1,2]triy)benzo[c]pyrano[2,3-c]oxepine-3(4H)-carboxylate (**8**)

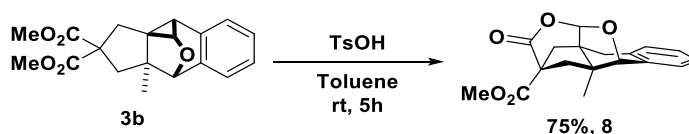

In a 4 mL screw-cap tube equipped with a magnetic stir bar was charged with **3b** (32.84 mg, 0.1 mmol, 1.0 eq) and TsOH (5.17 mg, 0.030 mmol, 0.3 eq.). The vial was purged with argon, then dry toluene (1 mL, 0.1 M) was added. The resulting mixture was placed in a preheated bath at 100°C and stirred for 2h. After TLC monitoring, the reaction was then cooled to room temperature and concentrated under vacuum. The crude mixture was purified by silica gel chromatography using an Tol/Et<sub>2</sub>O mixture as the eluant. (23.7 mg, 0.075 mmol, 76% yield)

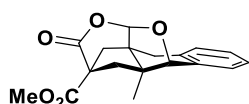

Chemical Formula: C<sub>18</sub>H<sub>18</sub>O<sub>5</sub>  
Molecular Weight: 314,3370

## Methyl-5a-methyl-3-oxo-5,5a,6,11-tetrahydro-1H-1,6-epoxy-4,11a-methanonaphtho[2,3-c]oxepine-4(3H)-carboxylate (**8**)

<sup>1</sup>H NMR (400 MHz, CDCl<sub>3</sub>) δ 7.29 – 7.25 (m, 1H), 7.23 – 7.14 (m, 1H), 5.40 (s, 1H), 4.80 (s, 1H), 3.82 (s, 3H), 3.07 – 2.93 (m, 2H), 2.51 – 2.39 (m, 3H), 2.24 (d, *J* = 12.7 Hz, 1H), 0.99 (s, 3H).

<sup>13</sup>C{<sup>1</sup>H} NMR (101 MHz, CDCl<sub>3</sub>) 170.6, 170.2, 137.7, 132.2, 129.6, 129.0, 128.9, 127.2, 107.4, 85.4, 56.6, 53.0, 52.8, 47.8, 41.1, 36.5, 34.0, 18.6.

HRMS (ESI) *m/z* [M + H]<sup>+</sup> calcd for C<sub>18</sub>H<sub>19</sub>O<sub>5</sub> 315.1227, found 315.1228.

## 2.5 Gram scale Reaction

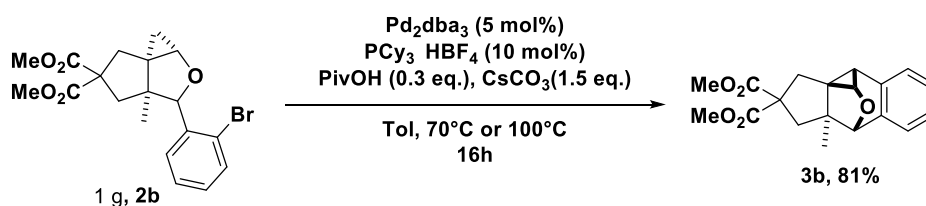

To a Schlenk tube was successively added the Pd complex (4.58 mg, 0.005 mmol, 5 mol%), the phosphine ligand (7.4 mg, 0.020 mmol, 10 mol%), PivOH (3.1 mg, 0.030 mmol, 0.3 eq.), the base (48.9 mg, 0.150 mmol, 1.5 eq.) and the cyclopropane derivative (0.1 mmol, 1.0 eq.). After, the tube was placed under Argon (3 times to vacuum argon exchange). Then Tol. (1 mL, 0.1 M) was added, and the tube was placed in a pre-heated oil bath at the indicated temperature. After TLC monitoring, the reaction mixture was filtered through a short pad of silica with a 1:1 petroleum ether/EtOAc mixture as the eluting solvent. The desired product was obtained using an Tol/Et<sub>2</sub>O mixture as the eluant (650.0 mg, 1.98 mmol, 81%).

### 3. Kinetic Isotope Effect (KIE) Experiments

#### Intramolecular Competition Experiment:

Following the general procedure B at 50°C, C-H Activation was done on a mixture of model substrate and d<sup>2</sup>-model substrate. The distribution of the product was calculated from the <sup>1</sup>H-NMR signal.

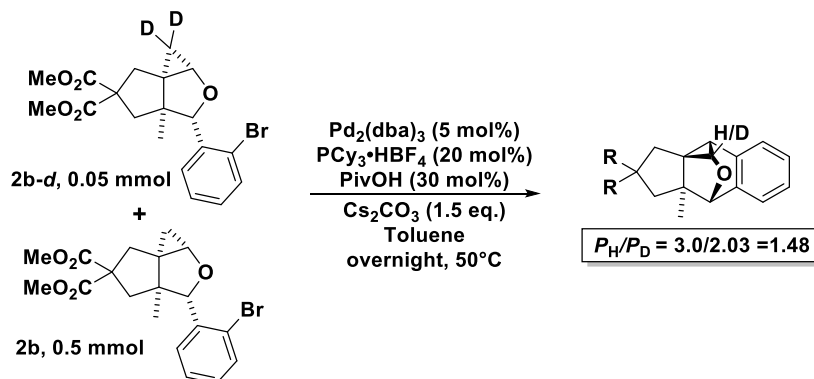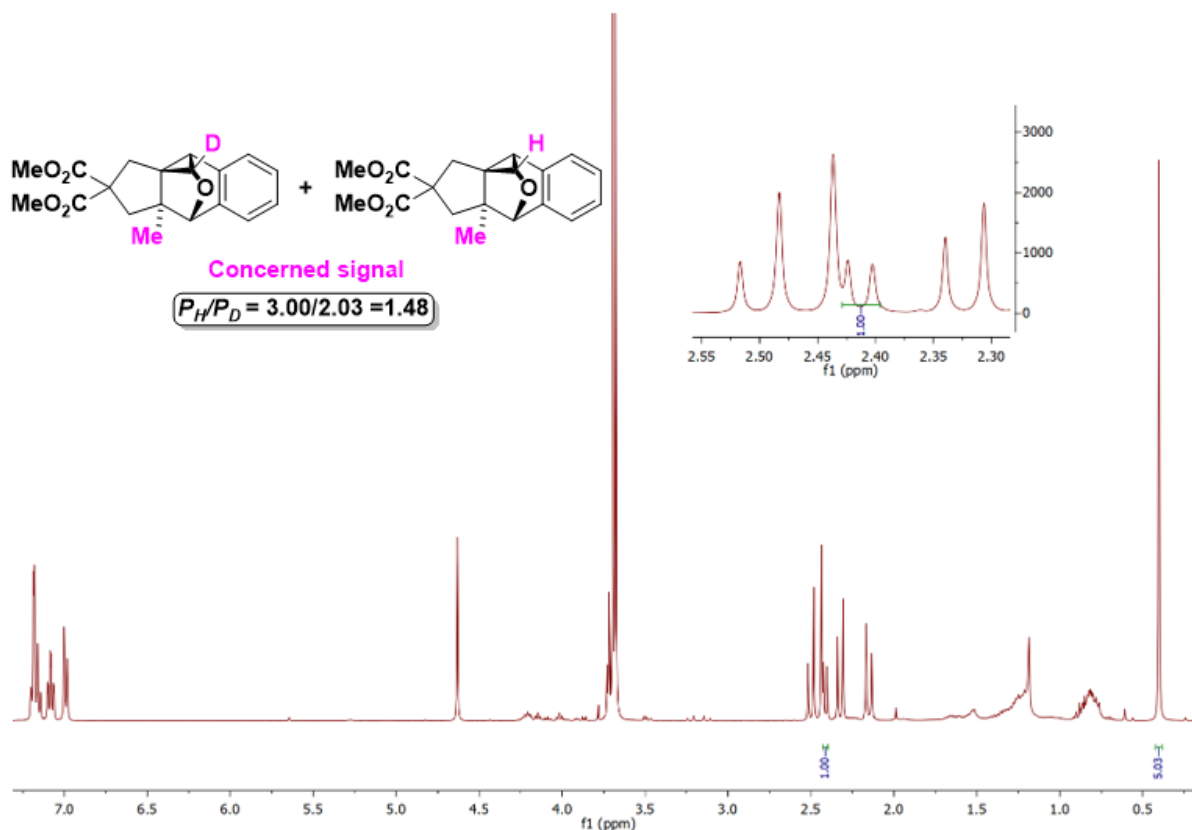

#### KIE Determination from Parallel Reactions

Reactions performed on a 0.1 mmol scale. To a screw cap NMR tube was successively added the Pd complex (4.58 mg, 0.005 mmol, 5 mol%), the phosphine ligand (7.4 mg, 0.020 mmol, 10 mol%), PivOH (3.1 mg, 0.030 mmol, 0.3 eq.), the base (48.9 mg, 0.150 mmol, 1.5 eq.) and 1,3,5-Trimethoxybenzene (0.033 mmol, 5.56 mg, 0.3 eq.) as an internal standard. The tube was then placed under Argon (3 times vacuum/argon exchange) and Tol. (0.5 mL, 0.2 M) was added. A solution of **2b** or **2b-D** in Tol. (0.5 mL, 0.2 M) was charged on a syringe. After 5min, the solution is added in the tube and vigorously shaken before placing it in a 500 MHz NMR

spectrometer for 1.5 hours at 70°C. An analysis is run every 10 minutes during this reaction time. The tables below summarize the results obtained.

**Table S1.** a. yields determined by <sup>1</sup>H NMR analysis of the crude reaction mixture using 1,3,5-trimethoxybenzene as internal standard.

| Time (minutes) | Yields <b>3b</b> (%) <sup>a</sup> | Yields <b>3b-d</b> (%) <sup>a</sup> |
|----------------|-----------------------------------|-------------------------------------|
| 10             | 12                                | 10                                  |
| 20             | 16                                | 14                                  |
| 30             | 19                                | 16                                  |
| 40             | 22                                | 17                                  |
| 50             | 24                                | 20                                  |
| 60             | 27                                | 23                                  |
| 70             | 29                                | 25                                  |
| 80             | 30                                | 26                                  |
| 90             | 33                                | 28                                  |

In this mechanistic study, the ratio of  $k_H/k_D$  was determined from initial slope method.

$$KIE = k_H/k_D = 0.2517/0.2200 = 1.14$$

**Figure 1.** Product Yield vs Time for Product 3a and 3a-D

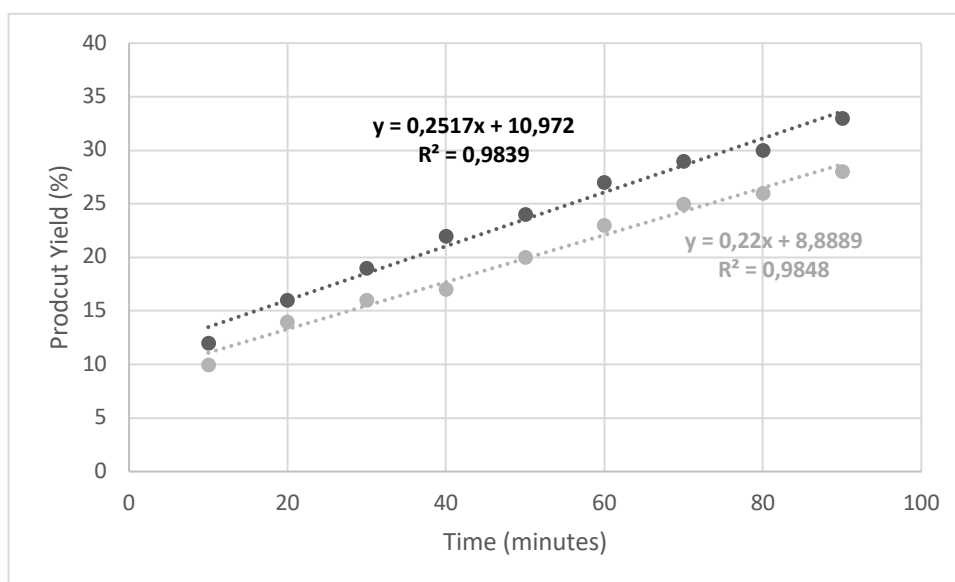

## 4. X-ray Data

• Single suitable crystal of  $C_{23}H_{28}O_5$  **3a** was selected and were on a SuperNova, Dual, Cu at home/near, AtlasS2 diffractometer. The crystal was kept at 295 K during data collection. Using Olex2<sup>[7]</sup>, the structure was solved with the SHELXT<sup>[8]</sup> structure solution program using Intrinsic Phasing and refined with the SHELXL<sup>[9]</sup> refinement package using Least Squares minimization.

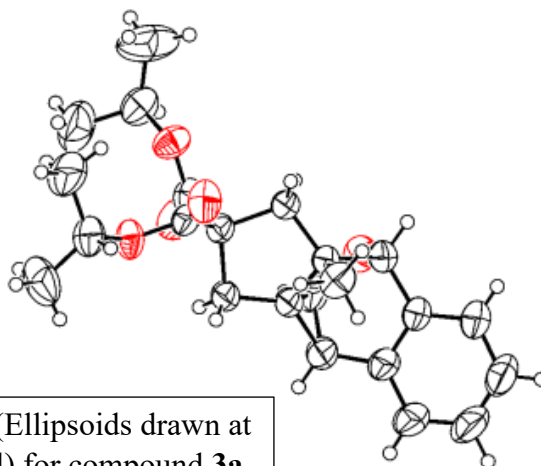

Standard Displacement Ellipsoid Plot (Ellipsoids drawn at 50% probability level) for compound **3a**.

**Table S2.** Crystal data and structure refinement for **3a**.

|                                               |                                                                    |
|-----------------------------------------------|--------------------------------------------------------------------|
| Identification code                           | <b>3a</b>                                                          |
| Empirical formula                             | $C_{23}H_{28}O_5$                                                  |
| Formula weight                                | 768.90                                                             |
| Temperature/K                                 | 295                                                                |
| Crystal system                                | triclinic                                                          |
| Space group                                   | P-1                                                                |
| $a/\text{\AA}$                                | 11.5105(3)                                                         |
| $b/\text{\AA}$                                | 14.1983(4)                                                         |
| $c/\text{\AA}$                                | 14.3748(4)                                                         |
| $\alpha/^\circ$                               | 70.403(2)                                                          |
| $\beta/^\circ$                                | 77.993(2)                                                          |
| $\gamma/^\circ$                               | 80.425(2)                                                          |
| Volume/ $\text{\AA}^3$                        | 2152.85(11)                                                        |
| Z                                             | 2                                                                  |
| $\rho_{\text{calc}}/\text{cm}^3$              | 1.186                                                              |
| $\mu/\text{mm}^{-1}$                          | 0.670                                                              |
| F(000)                                        | 824.0                                                              |
| Crystal size/ $\text{mm}^3$                   | $0.26 \times 0.26 \times 0.06$                                     |
| Radiation                                     | Cu $K\alpha$ ( $\lambda = 1.54184$ )                               |
| $2\Theta$ range for data collection/ $^\circ$ | 6.644 to 145.828                                                   |
| Index ranges                                  | $-14 \leq h \leq 14$ , $-17 \leq k \leq 17$ , $-16 \leq l \leq 17$ |
| Reflections collected                         | 40354                                                              |
| Independent reflections                       | 8384 [ $R_{\text{int}} = 0.0321$ , $R_{\text{sigma}} = 0.0192$ ]   |
| Data/restraints/parameters                    | 8384/9/515                                                         |
| Goodness-of-fit on $F^2$                      | 1.034                                                              |
| Final R indexes [ $I \geq 2\sigma(I)$ ]       | $R_1 = 0.0550$ , $wR_2 = 0.1508$                                   |
| Final R indexes [all data]                    | $R_1 = 0.0729$ , $wR_2 = 0.1661$                                   |



Largest diff. peak/hole / e Å<sup>-3</sup>

0.32/-0.19

**Table S3.** Fractional Atomic Coordinates ( $\times 10^4$ ) and Equivalent Isotropic Displacement Parameters ( $\text{\AA}^2 \times 10^3$ ) for **3a**.  $U_{\text{eq}}$  is defined as 1/3 of the trace of the orthogonalized  $U_{\text{IJ}}$  tensor.

| Atom | <i>x</i>     | <i>y</i>     | <i>z</i>     | $U(\text{eq})$ |
|------|--------------|--------------|--------------|----------------|
| O1   | 6516.9 (12)  | 716.5 (11)   | 1761.3 (11)  | 61.9 (4)       |
| O2   | 9631 (2)     | -1073.4 (13) | 2404.9 (17)  | 101.1 (7)      |
| O3   | 10193.3 (14) | -496.7 (10)  | 3481.7 (11)  | 60.8 (4)       |
| O4   | 10859.1 (13) | 1927.6 (11)  | 2166.5 (13)  | 68.4 (4)       |
| O5   | 11857.5 (11) | 644.8 (10)   | 1660.9 (12)  | 58.6 (4)       |
| C1   | 8424.4 (16)  | 1112.4 (16)  | 808.1 (14)   | 50.9 (4)       |
| C2   | 7470.4 (18)  | 418.2 (17)   | 1100.9 (17)  | 60.2 (5)       |
| C3   | 7683.7 (18)  | 1146.4 (18)  | 33.7 (17)    | 62.1 (5)       |
| C4   | 6740.3 (18)  | 1990.9 (18)  | -198.2 (16)  | 61.8 (5)       |
| C5   | 6365 (2)     | 2420 (2)     | -1121.3 (19) | 78.5 (7)       |
| C6   | 5447 (2)     | 3184 (3)     | -1243 (2)    | 91.7 (9)       |
| C7   | 4902 (2)     | 3536 (2)     | -462 (2)     | 88.6 (8)       |
| C8   | 5255.8 (19)  | 3114.7 (19)  | 465.6 (19)   | 71.1 (6)       |
| C9   | 6170.2 (17)  | 2338.2 (17)  | 603.3 (16)   | 57.9 (5)       |
| C10  | 6617.8 (16)  | 1775.8 (16)  | 1572.1 (15)  | 54.0 (5)       |
| C11  | 7977.0 (15)  | 1813.3 (14)  | 1424.9 (13)  | 46.0 (4)       |
| C12  | 8576.9 (16)  | 1255.6 (14)  | 2346.4 (14)  | 47.7 (4)       |
| C13  | 9776.1 (15)  | 700.5 (13)   | 1963.9 (13)  | 44.7 (4)       |
| C14  | 9712.7 (16)  | 772.6 (17)   | 871.4 (15)   | 54.7 (5)       |
| C15  | 8334 (2)     | 2887.3 (16)  | 934.4 (18)   | 64.5 (5)       |
| C16  | 9870.3 (17)  | -393.8 (15)  | 2622.9 (16)  | 54.4 (5)       |
| C17  | 10333 (2)    | -1518.1 (16) | 4190.3 (19)  | 71.7 (6)       |
| C18  | 11492 (3)    | -2057 (3)    | 3858 (3)     | 114.5 (11)     |
| C19  | 10204 (5)    | -1398 (2)    | 5193 (2)     | 137.3 (17)     |
| C20  | 10869.7 (16) | 1175.2 (14)  | 1966.2 (14)  | 47.4 (4)       |
| C21  | 13014.7 (17) | 993.4 (18)   | 1588.1 (19)  | 65.4 (6)       |
| C22  | 13867 (2)    | 555 (3)      | 869 (3)      | 100.6 (10)     |
| C23  | 13336 (2)    | 702 (3)      | 2610 (2)     | 100.4 (10)     |
| O6   | -358.3 (13)  | 4038.2 (11)  | 3432.6 (12)  | 65.5 (4)       |
| O7   | 4758.2 (15)  | 3616.8 (19)  | 2583.2 (15)  | 98.2 (7)       |
| O8   | 4776.3 (12)  | 4329.9 (13)  | 3732.3 (12)  | 69.9 (4)       |
| O9   | 1942.0 (18)  | 3329.5 (17)  | 5366.1 (14)  | 102.8 (7)      |
| O10  | 3529.0 (17)  | 2431.3 (15)  | 4850.1 (14)  | 98.0 (7)       |
| C24  | 1210.8 (17)  | 5045.6 (14)  | 3187.2 (16)  | 52.7 (5)       |
| C25  | 34.1 (19)    | 4694.1 (17)  | 3811.4 (17)  | 62.1 (5)       |
| C26  | 87.3 (18)    | 5782.1 (16)  | 3132.0 (17)  | 58.6 (5)       |
| C27  | -488.1 (17)  | 6032.5 (15)  | 2242.9 (17)  | 56.9 (5)       |
| C28  | -1107 (2)    | 6956.2 (17)  | 1821 (2)     | 71.4 (6)       |
| C29  | -1663 (2)    | 7091.6 (19)  | 1022 (2)     | 80.3 (7)       |
| C30  | -1602 (2)    | 6327 (2)     | 622 (2)      | 80.4 (7)       |

**Table S3.** Fractional Atomic Coordinates ( $\times 10^4$ ) and Equivalent Isotropic Displacement Parameters ( $\text{\AA}^2 \times 10^3$ ) for **3a**.  $U_{\text{eq}}$  is defined as 1/3 of the trace of the orthogonalized  $U_{ij}$  tensor.

| Atom | $x$         | $y$         | $z$         | $U(\text{eq})$ |
|------|-------------|-------------|-------------|----------------|
| C31  | -990.0 (19) | 5401.6 (18) | 1033.9 (18) | 64.9 (6)       |
| C32  | -426.0 (17) | 5254.5 (15) | 1833.4 (16) | 54.7 (5)       |
| C33  | 225.2 (17)  | 4285.8 (15) | 2390.0 (16) | 55.0 (5)       |
| C34  | 1484.5 (17) | 4463.3 (14) | 2454.4 (15) | 50.9 (4)       |
| C35  | 2242.1 (17) | 3540.1 (14) | 3025.1 (16) | 54.5 (5)       |
| C36  | 2910.8 (16) | 3917.1 (15) | 3653.2 (15) | 50.9 (4)       |
| C37  | 2307.7 (17) | 4994.4 (15) | 3608.5 (16) | 52.8 (5)       |
| C38  | 2182 (2)    | 5011.9 (18) | 1423.9 (17) | 65.8 (6)       |
| C39  | 4246.3 (18) | 3921.3 (17) | 3252.8 (16) | 58.7 (5)       |
| C40  | 6079.5 (19) | 4357 (2)    | 3455 (2)    | 81.3 (7)       |
| C41  | 6676 (3)    | 3352 (3)    | 3924 (4)    | 151.5 (19)     |
| C42  | 6362 (3)    | 5189 (4)    | 3749 (4)    | 137.9 (16)     |
| C43  | 2734.7 (18) | 3215.7 (18) | 4724.9 (17) | 63.1 (5)       |
| C44  | 3438 (3)    | 1638 (2)    | 5823 (2)    | 107.1 (10)     |
| C45  | 4164 (5)    | 1852 (4)    | 6445 (4)    | 179 (2)        |
| C46  | 3855 (6)    | 695 (3)     | 5605 (4)    | 189 (2)        |

**Table S4.** Anisotropic Displacement Parameters ( $\text{\AA}^2 \times 10^3$ ) for ad628p. The Anisotropic displacement factor exponent takes the form:  $-2\pi^2[h^2a^*2U_{11}+2hka^*b^*U_{12}+\dots]$ .

| Atom | $U_{11}$   | $U_{22}$  | $U_{33}$   | $U_{23}$   | $U_{13}$   | $U_{12}$   |
|------|------------|-----------|------------|------------|------------|------------|
| O1   | 50.2 (8)   | 66.4 (9)  | 67.6 (9)   | -15.2 (7)  | -9.2 (7)   | -15.1 (6)  |
| O2   | 146.7 (18) | 58.0 (10) | 123.8 (16) | -28.6 (10) | -71.9 (14) | -16.7 (10) |
| O3   | 79.3 (10)  | 47.5 (7)  | 57.0 (8)   | -10.2 (6)  | -23.4 (7)  | -7.5 (7)   |
| O4   | 58.4 (8)   | 59.6 (9)  | 102.3 (12) | -39.7 (8)  | -23.8 (8)  | -3.6 (7)   |
| O5   | 36.2 (6)   | 62.2 (8)  | 85.1 (10)  | -31.5 (7)  | -13.5 (6)  | -4.3 (6)   |
| C1   | 41.7 (9)   | 67.1 (12) | 48.2 (10)  | -24.0 (9)  | -11.4 (8)  | 0.4 (8)    |
| C2   | 51.2 (11)  | 61.7 (12) | 75.4 (14)  | -26.5 (11) | -20.3 (10) | -3.8 (9)   |
| C3   | 50.1 (11)  | 85.0 (15) | 62.6 (13)  | -36.3 (12) | -18.1 (9)  | 0.6 (10)   |
| C4   | 48.9 (11)  | 82.9 (15) | 56.9 (12)  | -21.4 (11) | -17.9 (9)  | -5.0 (10)  |
| C5   | 64.6 (14)  | 113 (2)   | 61.7 (14)  | -25.6 (14) | -24.7 (11) | -4.4 (13)  |
| C6   | 69.8 (16)  | 126 (2)   | 71.8 (17)  | -8.3 (16)  | -37.0 (14) | -4.5 (16)  |
| C7   | 62.1 (15)  | 102 (2)   | 91 (2)     | -12.5 (16) | -33.5 (14) | 11.9 (14)  |
| C8   | 48.8 (11)  | 84.9 (16) | 77.2 (16)  | -22.7 (13) | -19.3 (11) | 5.7 (11)   |
| C9   | 41.6 (10)  | 73.2 (13) | 59.6 (12)  | -20.1 (10) | -15.2 (9)  | 0.1 (9)    |
| C10  | 41.0 (9)   | 66.6 (12) | 54.0 (11)  | -20.4 (9)  | -7.4 (8)   | -1.7 (8)   |
| C11  | 38.4 (9)   | 56.0 (10) | 43.1 (10)  | -15.1 (8)  | -8.1 (7)   | -2.8 (7)   |
| C12  | 41.9 (9)   | 57.3 (10) | 45.9 (10)  | -18.8 (8)  | -9.8 (7)   | -2.0 (8)   |
| C13  | 39.4 (9)   | 51.6 (10) | 47.6 (10)  | -19.7 (8)  | -12.0 (7)  | -2.1 (7)   |
| C14  | 41.4 (9)   | 77.5 (13) | 52.6 (11)  | -31.2 (10) | -12.1 (8)  | 2.3 (9)    |
| C15  | 64.5 (13)  | 60.2 (12) | 68.4 (14)  | -11.4 (10) | -18.1 (11) | -14.4 (10) |

**Table S4.** Anisotropic Displacement Parameters ( $\text{\AA}^2 \times 10^3$ ) for ad628p. The Anisotropic displacement factor exponent takes the form:  $-2\pi^2[h^2a^*U_{11}+2hka^*b^*U_{12}+\dots]$ .

| Atom | U <sub>11</sub> | U <sub>22</sub> | U <sub>33</sub> | U <sub>23</sub> | U <sub>13</sub> | U <sub>12</sub> |
|------|-----------------|-----------------|-----------------|-----------------|-----------------|-----------------|
| C16  | 48.4 (10)       | 51.4 (10)       | 69.8 (13)       | -22.9 (10)      | -18.2 (9)       | -3.5 (8)        |
| C17  | 85.1 (16)       | 48.0 (11)       | 74.9 (16)       | -4.7 (10)       | -23.1 (13)      | -5.3 (11)       |
| C18  | 100 (2)         | 90 (2)          | 131 (3)         | -11 (2)         | -37 (2)         | 23.3 (18)       |
| C19  | 254 (5)         | 76.1 (19)       | 68 (2)          | -1.1 (15)       | -38 (3)         | -11 (3)         |
| C20  | 43.3 (9)        | 48.8 (10)       | 52.9 (11)       | -15.8 (8)       | -16.4 (8)       | -2.0 (8)        |
| C21  | 40.3 (10)       | 74.9 (14)       | 87.9 (16)       | -28.1 (12)      | -15.4 (10)      | -12.6 (9)       |
| C22  | 45.0 (13)       | 141 (3)         | 135 (3)         | -74 (2)         | 1.3 (14)        | -17.4 (15)      |
| C23  | 60.8 (15)       | 142 (3)         | 105 (2)         | -33 (2)         | -34.5 (15)      | -13.9 (16)      |
| O6   | 54.1 (8)        | 61.3 (8)        | 74.9 (10)       | -15.8 (7)       | -1.8 (7)        | -11.9 (7)       |
| O7   | 52.9 (9)        | 164 (2)         | 97.9 (14)       | -80.0 (14)      | 2.1 (9)         | -1.8 (11)       |
| O8   | 39.0 (7)        | 105.4 (12)      | 70.4 (10)       | -36.0 (9)       | -7.1 (6)        | -5.9 (7)        |
| O9   | 86.7 (13)       | 116.1 (15)      | 64.3 (11)       | -6.6 (10)       | 11.4 (9)        | 27.0 (11)       |
| O10  | 73.4 (11)       | 89.1 (12)       | 81.5 (12)       | 11.3 (10)       | 5.3 (9)         | 25.8 (9)        |
| C24  | 47.7 (10)       | 51.1 (10)       | 64.4 (12)       | -25.1 (9)       | -15.1 (9)       | 3.3 (8)         |
| C25  | 54.5 (12)       | 70.5 (13)       | 58.9 (13)       | -20.2 (11)      | -5.0 (9)        | -6.0 (10)       |
| C26  | 49.3 (11)       | 59.2 (12)       | 75.0 (14)       | -33.7 (11)      | -13.9 (9)       | 4.9 (9)         |
| C27  | 46.1 (10)       | 53.0 (11)       | 75.2 (14)       | -23.8 (10)      | -16.4 (9)       | 1.2 (8)         |
| C28  | 61.2 (13)       | 53.6 (12)       | 104.7 (19)      | -27.7 (12)      | -29.4 (13)      | 6.3 (10)        |
| C29  | 65.4 (14)       | 62.0 (14)       | 108 (2)         | -10.2 (13)      | -39.5 (14)      | 5.8 (11)        |
| C30  | 70.2 (15)       | 83.6 (17)       | 92.1 (19)       | -17.7 (14)      | -41.4 (14)      | -5.6 (13)       |
| C31  | 56.6 (12)       | 69.3 (13)       | 77.9 (15)       | -26.4 (11)      | -22.9 (11)      | -9.4 (10)       |
| C32  | 46.0 (10)       | 52.4 (11)       | 70.6 (13)       | -22.2 (9)       | -17.0 (9)       | -3.2 (8)        |
| C33  | 51.6 (11)       | 50.5 (10)       | 68.6 (13)       | -24.2 (9)       | -12.5 (9)       | -5.4 (8)        |
| C34  | 46.3 (10)       | 47.9 (10)       | 63.1 (12)       | -22.8 (9)       | -14.3 (8)       | 1.1 (8)         |
| C35  | 47.0 (10)       | 49.3 (10)       | 67.8 (13)       | -20.8 (9)       | -11.5 (9)       | 1.4 (8)         |
| C36  | 39.6 (9)        | 58.1 (11)       | 52.5 (11)       | -17.2 (9)       | -8.2 (8)        | 2.3 (8)         |
| C37  | 46.0 (10)       | 59.8 (11)       | 58.5 (12)       | -25.4 (9)       | -14.0 (8)       | 0.0 (8)         |
| C38  | 55.9 (12)       | 75.0 (14)       | 61.5 (13)       | -18.3 (11)      | -1.9 (10)       | -9.7 (10)       |
| C39  | 44.0 (10)       | 73.3 (13)       | 56.1 (12)       | -20.6 (10)      | -9.0 (9)        | 3.1 (9)         |
| C40  | 39.8 (11)       | 117 (2)         | 86.0 (18)       | -31.7 (16)      | -6.8 (11)       | -9.5 (12)       |
| C41  | 57.1 (17)       | 155 (4)         | 203 (5)         | 1 (3)           | -45 (2)         | 5 (2)           |
| C42  | 68.6 (19)       | 192 (4)         | 185 (4)         | -92 (4)         | -12 (2)         | -42 (2)         |
| C43  | 45.6 (10)       | 73.5 (14)       | 61.0 (13)       | -14.6 (11)      | -7.7 (9)        | 4.8 (10)        |
| C44  | 82.6 (19)       | 100.2 (19)      | 88 (2)          | 19.7 (15)       | -5.2 (14)       | 15.6 (15)       |
| C45  | 214 (6)         | 150 (4)         | 141 (4)         | 39 (3)          | -81 (4)         | -41 (4)         |
| C46  | 268 (7)         | 92 (2)          | 141 (4)         | 13 (2)          | 0 (4)           | 13 (3)          |

**Table S5.** Bond Lengths for 3a.

| Atom | Atom | Length/ $\text{\AA}$ | Atom | Atom | Length/ $\text{\AA}$ |
|------|------|----------------------|------|------|----------------------|
| O1   | C2   | 1.402 (3)            | O6   | C25  | 1.396 (3)            |

**Table S5. Bond Lengths for 3a.**

| Atom | Atom | Length/Å  | Atom | Atom | Length/Å  |
|------|------|-----------|------|------|-----------|
| O1   | C10  | 1.456 (2) | O6   | C33  | 1.458 (3) |
| O2   | C16  | 1.197 (2) | O7   | C39  | 1.191 (3) |
| O3   | C16  | 1.317 (2) | O8   | C39  | 1.321 (3) |
| O3   | C17  | 1.472 (2) | O8   | C40  | 1.473 (3) |
| O4   | C20  | 1.194 (2) | O9   | C43  | 1.187 (3) |
| O5   | C20  | 1.335 (2) | O10  | C43  | 1.305 (3) |
| O5   | C21  | 1.469 (2) | O10  | C44  | 1.469 (3) |
| C1   | C2   | 1.498 (3) | C24  | C25  | 1.519 (3) |
| C1   | C3   | 1.521 (3) | C24  | C26  | 1.520 (3) |
| C1   | C11  | 1.508 (3) | C24  | C34  | 1.501 (3) |
| C1   | C14  | 1.493 (3) | C24  | C37  | 1.491 (3) |
| C2   | C3   | 1.532 (3) | C25  | C26  | 1.529 (3) |
| C3   | C4   | 1.476 (3) | C26  | C27  | 1.472 (3) |
| C4   | C5   | 1.388 (3) | C27  | C28  | 1.390 (3) |
| C4   | C9   | 1.400 (3) | C27  | C32  | 1.402 (3) |
| C5   | C6   | 1.375 (4) | C28  | C29  | 1.373 (4) |
| C6   | C7   | 1.372 (4) | C29  | C30  | 1.375 (4) |
| C7   | C8   | 1.382 (4) | C30  | C31  | 1.384 (3) |
| C8   | C9   | 1.384 (3) | C31  | C32  | 1.375 (3) |
| C9   | C10  | 1.503 (3) | C32  | C33  | 1.504 (3) |
| C10  | C11  | 1.542 (2) | C33  | C34  | 1.538 (3) |
| C11  | C12  | 1.534 (3) | C34  | C35  | 1.532 (3) |
| C11  | C15  | 1.535 (3) | C34  | C38  | 1.544 (3) |
| C12  | C13  | 1.563 (2) | C35  | C36  | 1.564 (3) |
| C13  | C14  | 1.555 (3) | C36  | C37  | 1.557 (3) |
| C13  | C16  | 1.524 (3) | C36  | C39  | 1.525 (3) |
| C13  | C20  | 1.525 (2) | C36  | C43  | 1.521 (3) |
| C17  | C18  | 1.495 (4) | C40  | C41  | 1.478 (5) |
| C17  | C19  | 1.481 (4) | C40  | C42  | 1.484 (5) |
| C21  | C22  | 1.492 (4) | C44  | C45  | 1.473 (6) |
| C21  | C23  | 1.494 (4) | C44  | C46  | 1.457 (6) |

**Table S6. Bond Angles for 3a.**

| Atom | Atom | Atom | Angle/°     | Atom | Atom | Atom | Angle/°     |
|------|------|------|-------------|------|------|------|-------------|
| C2   | O1   | C10  | 104.47 (15) | C25  | O6   | C33  | 104.90 (15) |
| C16  | O3   | C17  | 117.83 (16) | C39  | O8   | C40  | 117.79 (18) |
| C20  | O5   | C21  | 118.05 (15) | C43  | O10  | C44  | 119.0 (2)   |
| C2   | C1   | C3   | 60.98 (14)  | C25  | C24  | C26  | 60.43 (14)  |
| C2   | C1   | C11  | 103.83 (16) | C34  | C24  | C25  | 103.08 (16) |
| C11  | C1   | C3   | 116.98 (16) | C34  | C24  | C26  | 116.71 (17) |
| C14  | C1   | C2   | 124.25 (19) | C37  | C24  | C25  | 124.31 (19) |

**Table S6.** Bond Angles for **3a**.

| Atom | Atom | Atom | Angle/°     | Atom | Atom | Atom | Angle/°     |
|------|------|------|-------------|------|------|------|-------------|
| C14  | C1   | C3   | 130.90 (17) | C37  | C24  | C26  | 131.14 (17) |
| C14  | C1   | C11  | 108.80 (15) | C37  | C24  | C34  | 109.22 (16) |
| O1   | C2   | C1   | 110.13 (17) | O6   | C25  | C24  | 109.70 (17) |
| O1   | C2   | C3   | 116.22 (18) | O6   | C25  | C26  | 116.48 (19) |
| C1   | C2   | C3   | 60.26 (14)  | C24  | C25  | C26  | 59.80 (13)  |
| C1   | C3   | C2   | 58.77 (13)  | C24  | C26  | C25  | 59.76 (13)  |
| C4   | C3   | C1   | 117.42 (18) | C27  | C26  | C24  | 117.55 (17) |
| C4   | C3   | C2   | 114.68 (18) | C27  | C26  | C25  | 114.39 (18) |
| C5   | C4   | C3   | 125.0 (2)   | C28  | C27  | C26  | 124.71 (19) |
| C5   | C4   | C9   | 119.4 (2)   | C28  | C27  | C32  | 119.3 (2)   |
| C9   | C4   | C3   | 115.62 (19) | C32  | C27  | C26  | 115.98 (18) |
| C6   | C5   | C4   | 119.9 (3)   | C29  | C28  | C27  | 119.8 (2)   |
| C7   | C6   | C5   | 120.7 (2)   | C28  | C29  | C30  | 120.8 (2)   |
| C6   | C7   | C8   | 120.3 (2)   | C29  | C30  | C31  | 120.1 (2)   |
| C7   | C8   | C9   | 119.7 (2)   | C32  | C31  | C30  | 119.8 (2)   |
| C4   | C9   | C10  | 114.04 (18) | C27  | C32  | C33  | 113.57 (18) |
| C8   | C9   | C4   | 120.0 (2)   | C31  | C32  | C27  | 120.16 (19) |
| C8   | C9   | C10  | 126.0 (2)   | C31  | C32  | C33  | 126.16 (18) |
| O1   | C10  | C9   | 106.65 (16) | O6   | C33  | C32  | 106.56 (16) |
| O1   | C10  | C11  | 103.04 (15) | O6   | C33  | C34  | 102.39 (16) |
| C9   | C10  | C11  | 109.61 (16) | C32  | C33  | C34  | 110.08 (16) |
| C1   | C11  | C10  | 100.64 (15) | C24  | C34  | C33  | 101.54 (15) |
| C1   | C11  | C12  | 100.09 (15) | C24  | C34  | C35  | 100.12 (16) |
| C1   | C11  | C15  | 115.25 (17) | C24  | C34  | C38  | 114.53 (17) |
| C12  | C11  | C10  | 116.04 (15) | C33  | C34  | C38  | 112.57 (17) |
| C12  | C11  | C15  | 111.41 (16) | C35  | C34  | C33  | 115.72 (16) |
| C15  | C11  | C10  | 112.48 (16) | C35  | C34  | C38  | 111.43 (17) |
| C11  | C12  | C13  | 106.32 (14) | C34  | C35  | C36  | 106.13 (15) |
| C14  | C13  | C12  | 105.97 (14) | C37  | C36  | C35  | 106.01 (14) |
| C16  | C13  | C12  | 109.07 (15) | C39  | C36  | C35  | 112.15 (16) |
| C16  | C13  | C14  | 110.57 (16) | C39  | C36  | C37  | 111.31 (17) |
| C16  | C13  | C20  | 109.10 (14) | C43  | C36  | C35  | 108.12 (17) |
| C20  | C13  | C12  | 112.87 (14) | C43  | C36  | C37  | 110.41 (16) |
| C20  | C13  | C14  | 109.23 (15) | C43  | C36  | C39  | 108.77 (16) |
| C1   | C14  | C13  | 102.39 (14) | C24  | C37  | C36  | 102.16 (15) |
| O2   | C16  | O3   | 123.9 (2)   | O7   | C39  | O8   | 123.4 (2)   |
| O2   | C16  | C13  | 124.07 (19) | O7   | C39  | C36  | 125.3 (2)   |
| O3   | C16  | C13  | 111.91 (15) | O8   | C39  | C36  | 111.25 (17) |
| O3   | C17  | C18  | 109.5 (2)   | O8   | C40  | C41  | 109.0 (2)   |
| O3   | C17  | C19  | 106.3 (2)   | O8   | C40  | C42  | 106.3 (2)   |
| C19  | C17  | C18  | 115.2 (3)   | C41  | C40  | C42  | 115.7 (3)   |
| O4   | C20  | O5   | 124.47 (17) | O9   | C43  | O10  | 123.2 (2)   |
| O4   | C20  | C13  | 126.00 (17) | O9   | C43  | C36  | 124.9 (2)   |

**Table S6. Bond Angles for 3a.**

| Atom | Atom | Atom | Angle/°     | Atom | Atom | Atom | Angle/°     |
|------|------|------|-------------|------|------|------|-------------|
| O5   | C20  | C13  | 109.46 (15) | O10  | C43  | C36  | 111.78 (18) |
| O5   | C21  | C22  | 105.69 (18) | O10  | C44  | C45  | 108.5 (3)   |
| O5   | C21  | C23  | 109.4 (2)   | C46  | C44  | O10  | 106.0 (3)   |
| C22  | C21  | C23  | 115.1 (2)   | C46  | C44  | C45  | 113.2 (4)   |

**Table S7. Torsion Angles for 3a.**

| A  | B   | C   | D   | Angle/°     | A   | B   | C   | D   | Angle/°     |
|----|-----|-----|-----|-------------|-----|-----|-----|-----|-------------|
| O1 | C2  | C3  | C1  | 99.23 (19)  | O6  | C25 | C26 | C24 | -98.39 (19) |
| O1 | C2  | C3  | C4  | -9.1 (3)    | O6  | C25 | C26 | C27 | 10.5 (3)    |
| O1 | C10 | C11 | C1  | 41.07 (18)  | O6  | C33 | C34 | C24 | -41.62 (18) |
| O1 | C10 | C11 | C12 | -65.8 (2)   | O6  | C33 | C34 | C35 | 65.7 (2)    |
| O1 | C10 | C11 | C15 | 164.26 (16) | O6  | C33 | C34 | C38 | -           |
| C1 | C2  | C3  | C4  | -108.3 (2)  | C24 | C25 | C26 | C27 | 108.88 (19) |
| C1 | C3  | C4  | C5  | 148.8 (2)   | C24 | C26 | C27 | C28 | -148.1 (2)  |
| C1 | C3  | C4  | C9  | -33.8 (3)   | C24 | C26 | C27 | C32 | 34.3 (3)    |
| C1 | C11 | C12 | C13 | 31.05 (18)  | C24 | C34 | C35 | C36 | -31.47 (19) |
| C2 | O1  | C10 | C9  | 75.83 (18)  | C25 | O6  | C33 | C32 | -75.45 (18) |
| C2 | O1  | C10 | C11 | -39.56 (18) | C25 | O6  | C33 | C34 | 40.15 (19)  |
| C2 | C1  | C3  | C4  | 103.6 (2)   | C25 | C24 | C26 | C27 | -103.6 (2)  |
| C2 | C1  | C11 | C10 | -26.95 (19) | C25 | C24 | C34 | C33 | 27.17 (19)  |
| C2 | C1  | C11 | C12 | 92.20 (17)  | C25 | C24 | C34 | C35 | -91.94 (17) |
| C2 | C1  | C11 | C15 | -           | C25 | C24 | C34 | C38 | 148.76 (18) |
| C2 | C1  | C14 | C13 | -87.4 (2)   | C25 | C24 | C37 | C36 | 87.3 (2)    |
| C2 | C3  | C4  | C5  | -145.1 (2)  | C25 | C26 | C27 | C28 | 144.7 (2)   |
| C2 | C3  | C4  | C9  | 32.3 (3)    | C25 | C26 | C27 | C32 | -32.9 (3)   |
| C3 | C1  | C2  | O1  | -           | C26 | C24 | C25 | O6  | 109.9 (2)   |
| C3 | C1  | C11 | C10 | 109.43 (19) | C26 | C24 | C34 | C33 | -36.1 (2)   |
| C3 | C1  | C11 | C12 | 37.2 (2)    | C26 | C24 | C34 | C35 | -           |
| C3 | C1  | C11 | C15 | 156.39 (18) | C26 | C24 | C34 | C38 | 155.19 (18) |
| C3 | C1  | C14 | C13 | -84.0 (2)   | C26 | C24 | C37 | C36 | 85.5 (2)    |
| C3 | C1  | C14 | C13 | -166.7 (2)  | C26 | C24 | C37 | C36 | 166.0 (2)   |
| C3 | C4  | C5  | C6  | 177.8 (2)   | C26 | C27 | C28 | C29 | -176.6 (2)  |
| C3 | C4  | C9  | C8  | -178.7 (2)  | C26 | C27 | C32 | C31 | 176.7 (2)   |
| C3 | C4  | C9  | C10 | -0.6 (3)    | C26 | C27 | C32 | C33 | 0.2 (3)     |
| C4 | C5  | C6  | C7  | 0.7 (5)     | C27 | C28 | C29 | C30 | -0.9 (4)    |
| C4 | C9  | C10 | O1  | -54.5 (2)   | C27 | C32 | C33 | O6  | 54.7 (2)    |
| C4 | C9  | C10 | C11 | 56.4 (2)    | C27 | C32 | C33 | C34 | -55.6 (2)   |
| C5 | C4  | C9  | C8  | -1.1 (3)    | C28 | C27 | C32 | C31 | -1.1 (3)    |
| C5 | C4  | C9  | C10 | 177.0 (2)   | C28 | C27 | C32 | C33 | -177.5 (2)  |

**Table S7.** Torsion Angles for **3a**.

| A   | B   | C   | D   | Angle/°          | A   | B   | C   | D   | Angle/°          |
|-----|-----|-----|-----|------------------|-----|-----|-----|-----|------------------|
| C5  | C6  | C7  | C8  | -1.2 (5)         | C28 | C29 | C30 | C31 | 1.0 (4)          |
| C6  | C7  | C8  | C9  | 0.5 (4)          | C29 | C30 | C31 | C32 | -1.1 (4)         |
| C7  | C8  | C9  | C4  | 0.7 (4)          | C30 | C31 | C32 | C27 | 1.2 (3)          |
| C7  | C8  | C9  | C10 | -177.2 (2)       | C30 | C31 | C32 | C33 | 177.1 (2)        |
| C8  | C9  | C10 | O1  | 123.5 (2)        | C31 | C32 | C33 | O6  | -121.4 (2)       |
| C8  | C9  | C10 | C11 | -125.6 (2)       | C31 | C32 | C33 | C34 | 128.3 (2)        |
| C9  | C4  | C5  | C6  | 0.5 (4)          | C32 | C27 | C28 | C29 | 1.0 (4)          |
| C9  | C10 | C11 | C1  | -72.18 (19)      | C32 | C33 | C34 | C24 | 71.4 (2)         |
| C9  | C10 | C11 | C12 | -<br>179.05 (16) | C32 | C33 | C34 | C35 | 178.70 (17)      |
| C9  | C10 | C11 | C15 | 51.0 (2)         | C32 | C33 | C34 | C38 | -51.5 (2)        |
| C10 | O1  | C2  | C1  | 22.6 (2)         | C33 | O6  | C25 | C24 | -23.2 (2)        |
| C10 | O1  | C2  | C3  | -43.3 (2)        | C33 | O6  | C25 | C26 | 42.1 (2)         |
| C10 | C11 | C12 | C13 | 138.25 (16)      | C33 | C34 | C35 | C36 | -<br>139.62 (17) |
| C11 | C1  | C2  | O1  | 4.0 (2)          | C34 | C24 | C25 | O6  | -3.6 (2)         |
| C11 | C1  | C2  | C3  | 113.44 (17)      | C34 | C24 | C25 | C26 | -<br>113.50 (18) |
| C11 | C1  | C3  | C2  | -91.39 (19)      | C34 | C24 | C26 | C25 | 90.3 (2)         |
| C11 | C1  | C3  | C4  | 12.2 (3)         | C34 | C24 | C26 | C27 | -13.3 (3)        |
| C11 | C1  | C14 | C13 | 35.1 (2)         | C34 | C24 | C37 | C36 | -34.5 (2)        |
| C11 | C12 | C13 | C14 | -11.42 (19)      | C34 | C35 | C36 | C37 | 12.2 (2)         |
| C11 | C12 | C13 | C16 | -<br>130.48 (16) | C34 | C35 | C36 | C39 | -<br>109.50 (19) |
| C11 | C12 | C13 | C20 | 108.08 (17)      | C34 | C35 | C36 | C43 | 130.58 (17)      |
| C12 | C13 | C14 | C1  | -13.4 (2)        | C35 | C36 | C37 | C24 | 12.5 (2)         |
| C12 | C13 | C16 | O2  | 98.9 (3)         | C35 | C36 | C39 | O7  | -4.6 (3)         |
| C12 | C13 | C16 | O3  | -78.13 (19)      | C35 | C36 | C39 | O8  | 174.07 (17)      |
| C12 | C13 | C20 | O4  | -4.8 (3)         | C35 | C36 | C43 | O9  | -90.6 (3)        |
| C12 | C13 | C20 | O5  | 178.11 (15)      | C35 | C36 | C43 | O10 | 85.8 (2)         |
| C14 | C1  | C2  | O1  | 128.70 (19)      | C37 | C24 | C25 | O6  | -128.2 (2)       |
| C14 | C1  | C2  | C3  | -121.9 (2)       | C37 | C24 | C25 | C26 | 121.9 (2)        |
| C14 | C1  | C3  | C2  | 111.8 (3)        | C37 | C24 | C26 | C25 | -111.4 (3)       |
| C14 | C1  | C3  | C4  | -144.6 (2)       | C37 | C24 | C26 | C27 | 145.0 (2)        |
| C14 | C1  | C11 | C10 | -<br>161.07 (17) | C37 | C24 | C34 | C33 | 161.10 (17)      |
| C14 | C1  | C11 | C12 | -41.9 (2)        | C37 | C24 | C34 | C35 | 42.0 (2)         |
| C14 | C1  | C11 | C15 | 77.7 (2)         | C37 | C24 | C34 | C38 | -77.3 (2)        |
| C14 | C13 | C16 | O2  | -17.2 (3)        | C37 | C36 | C39 | O7  | -123.2 (3)       |
| C14 | C13 | C16 | O3  | 165.72 (16)      | C37 | C36 | C39 | O8  | 55.5 (2)         |
| C14 | C13 | C20 | O4  | 112.8 (2)        | C37 | C36 | C43 | O9  | 24.9 (3)         |
| C14 | C13 | C20 | O5  | -64.28 (19)      | C37 | C36 | C43 | O10 | -158.6 (2)       |
| C15 | C11 | C12 | C13 | -91.31 (18)      | C38 | C34 | C35 | C36 | 90.08 (19)       |
| C16 | O3  | C17 | C18 | 77.5 (3)         | C39 | O8  | C40 | C41 | -78.2 (3)        |
| C16 | O3  | C17 | C19 | -157.5 (3)       | C39 | O8  | C40 | C42 | 156.5 (3)        |

**Table S7.** Torsion Angles for **3a**.

| A   | B   | C   | D   | Angle/°     | A   | B   | C   | D   | Angle/°     |
|-----|-----|-----|-----|-------------|-----|-----|-----|-----|-------------|
| C16 | C13 | C14 | C1  | 104.66 (18) | C39 | C36 | C37 | C24 | 134.73 (18) |
| C16 | C13 | C20 | O4  | -126.3 (2)  | C39 | C36 | C43 | O9  | 147.3 (3)   |
| C16 | C13 | C20 | O5  | 56.7 (2)    | C39 | C36 | C43 | O10 | -36.2 (3)   |
| C17 | O3  | C16 | O2  | 3.6 (3)     | C40 | O8  | C39 | O7  | -3.4 (4)    |
| C17 | O3  | C16 | C13 | 179.34 (17) | C40 | O8  | C39 | C36 | 177.89 (19) |
| C20 | O5  | C21 | C22 | -157.5 (2)  | C43 | O10 | C44 | C45 | -92.4 (4)   |
| C20 | O5  | C21 | C23 | 78.0 (3)    | C43 | O10 | C44 | C46 | 145.7 (4)   |
| C20 | C13 | C14 | C1  | 135.27 (16) | C43 | C36 | C37 | C24 | 104.36 (19) |
| C20 | C13 | C16 | O2  | -137.3 (2)  | C43 | C36 | C39 | O7  | 114.9 (3)   |
| C20 | C13 | C16 | O3  | 45.6 (2)    | C43 | C36 | C39 | O8  | -66.4 (2)   |
| C21 | O5  | C20 | O4  | 1.5 (3)     | C44 | O10 | C43 | O9  | 1.0 (4)     |
| C21 | O5  | C20 | C13 | 178.65 (17) | C44 | O10 | C43 | C36 | -175.5 (3)  |

**Table S8.** Hydrogen Atom Coordinates ( $\text{\AA} \times 10^4$ ) and Isotropic Displacement Parameters ( $\text{\AA}^2 \times 10^3$ ) for **3a**.

| Atom | x        | y        | z        | U(eq) |
|------|----------|----------|----------|-------|
| H2   | 7707.2   | -301.35  | 1209.9   | 72    |
| H3   | 8071.32  | 863.46   | -502.86  | 74    |
| H5   | 6734.25  | 2191.43  | -1657.15 | 94    |
| H6   | 5193.28  | 3464.47  | -1860.3  | 110   |
| H7   | 4292.32  | 4061.53  | -556.99  | 106   |
| H8   | 4880.92  | 3351.45  | 994.93   | 85    |
| H10  | 6184.6   | 2018.08  | 2125.09  | 65    |
| H12A | 8069.38  | 776.7    | 2837.79  | 57    |
| H12B | 8729.35  | 1726.81  | 2652.69  | 57    |
| H14A | 10220.85 | 1257.8   | 390.57   | 66    |
| H14B | 9941.86  | 124.92   | 760.51   | 66    |
| H15A | 9188.21  | 2868.66  | 817.7    | 97    |
| H15B | 7993.25  | 3282.92  | 1369.85  | 97    |
| H15C | 8043.22  | 3181.79  | 308.88   | 97    |
| H17  | 9681.03  | -1882.08 | 4189.15  | 86    |
| H18A | 11586.3  | -2721.45 | 4323.12  | 172   |
| H18B | 12137.86 | -1694.76 | 3831.56  | 172   |
| H18C | 11495.94 | -2101.64 | 3205.34  | 172   |
| H19A | 10848.49 | -1056.13 | 5209.5   | 206   |
| H19B | 10222.88 | -2048.16 | 5690.93  | 206   |
| H19C | 9457.37  | -1012.27 | 5327.34  | 206   |
| H21  | 12946.48 | 1727.82  | 1305.91  | 79    |
| H22A | 13969.71 | -163.47  | 1152.26  | 151   |
| H22B | 14623.82 | 814.92   | 736.53   | 151   |



**Table S8.** Hydrogen Atom Coordinates ( $\text{\AA}\times 10^4$ ) and Isotropic Displacement Parameters ( $\text{\AA}^2\times 10^3$ ) for **3a**.

| Atom | x        | y       | z       | U(eq) |
|------|----------|---------|---------|-------|
| H22C | 13556.94 | 731.38  | 255.3   | 151   |
| H23A | 12726.88 | 996.04  | 3027.52 | 151   |
| H23B | 14085.85 | 939.37  | 2564.14 | 151   |
| H23C | 13400.95 | -16.74  | 2894.72 | 151   |
| H25  | -82.12   | 4554.52 | 4538.15 | 74    |
| H26  | 17.15    | 6302.45 | 3453.93 | 70    |
| H28  | -1144.28 | 7481.52 | 2079.51 | 86    |
| H29  | -2086.25 | 7707.79 | 747.08  | 96    |
| H30  | -1973.05 | 6431.05 | 74.18   | 97    |
| H31  | -960.24  | 4881.03 | 770.37  | 78    |
| H33  | 238.75   | 3745.42 | 2105.26 | 66    |
| H35A | 2809.17  | 3258.01 | 2561.81 | 65    |
| H35B | 1737.99  | 3028.21 | 3460.71 | 65    |
| H37A | 2109.57  | 5073.79 | 4269.56 | 63    |
| H37B | 2817.22  | 5502.81 | 3174.38 | 63    |
| H38A | 2179.12  | 4660    | 958.97  | 99    |
| H38B | 2990.36  | 5031.07 | 1488.57 | 99    |
| H38C | 1809.63  | 5685.63 | 1183.41 | 99    |
| H40  | 6291.2   | 4519.56 | 2726.09 | 98    |
| H41A | 6520.12  | 3201.57 | 4638.08 | 227   |
| H41B | 7521.28  | 3343.98 | 3692.6  | 227   |
| H41C | 6373.91  | 2856.28 | 3744.7  | 227   |
| H42A | 5822.71  | 5777.52 | 3515.89 | 207   |
| H42B | 7167.53  | 5333.34 | 3457.15 | 207   |
| H42C | 6278.16  | 4995.25 | 4465.12 | 207   |
| H44  | 2602.5   | 1628.33 | 6152.94 | 129   |
| H45A | 3865.7   | 2489.56 | 6544.02 | 269   |
| H45B | 4979.7   | 1870.72 | 6114.27 | 269   |
| H45C | 4120.92  | 1334.26 | 7081.09 | 269   |
| H46A | 3363.13  | 605.42  | 5183.86 | 283   |
| H46B | 3807.6   | 147.28  | 6219.47 | 283   |
| H46C | 4667.64  | 712.69  | 5268.79 | 283   |

• Single suitable crystal of C<sub>18</sub>H<sub>18</sub>O<sub>5</sub> **8** was selected and were on a SuperNova, Dual, Cu at home/near, AtlasS2 diffractometer. The crystal was kept at 295 K during data collection. Using Olex2<sup>[7]</sup>, the structure was solved with the SHELXT<sup>[8]</sup> structure solution program using Intrinsic Phasing and refined with the SHELXL<sup>[9]</sup> refinement package using Least Squares minimization.

CDCC Deposit Number: 2339538

Standard Displacement Ellipsoid Plot (Ellipsoids drawn at 50% probability level) for compound **8**.

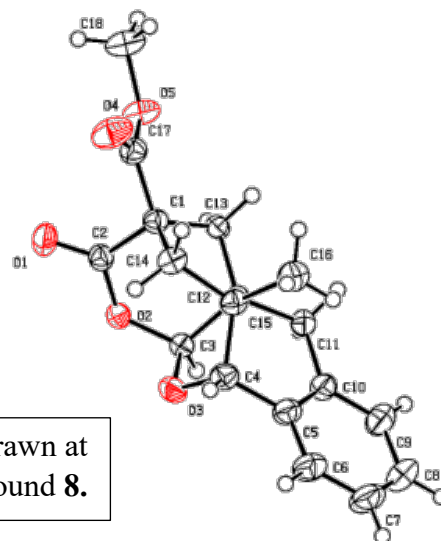

**Table S9.** Crystal data and structure refinement for **8**.

|                                             |                                                               |
|---------------------------------------------|---------------------------------------------------------------|
| Identification code                         | <b>8</b>                                                      |
| Empirical formula                           | C <sub>18</sub> H <sub>18</sub> O <sub>5</sub>                |
| Formula weight                              | 628.65                                                        |
| Temperature/K                               | 240.00(10)                                                    |
| Crystal system                              | triclinic                                                     |
| Space group                                 | P-1                                                           |
| a/Å                                         | 11.7560(2)                                                    |
| b/Å                                         | 12.0801(2)                                                    |
| c/Å                                         | 12.2130(3)                                                    |
| α/°                                         | 63.904(2)                                                     |
| β/°                                         | 78.660(2)                                                     |
| γ/°                                         | 85.123(2)                                                     |
| Volume/Å <sup>3</sup>                       | 1527.19(6)                                                    |
| Z                                           | 2                                                             |
| ρ <sub>calc</sub> /cm <sup>3</sup>          | 1.367                                                         |
| μ/mm <sup>-1</sup>                          | 0.825                                                         |
| F(000)                                      | 664.0                                                         |
| Crystal size/mm <sup>3</sup>                | 0.24 × 0.14 × 0.1                                             |
| Radiation                                   | Cu Kα (λ = 1.54184)                                           |
| 2θ range for data collection/°              | 7.67 to 144.764                                               |
| Index ranges                                | -14 ≤ h ≤ 14, -14 ≤ k ≤ 14, -15 ≤ l ≤ 15                      |
| Reflections collected                       | 31992                                                         |
| Independent reflections                     | 5950 [R <sub>int</sub> = 0.0249, R <sub>sigma</sub> = 0.0153] |
| Data/restraints/parameters                  | 5950/0/420                                                    |
| Goodness-of-fit on F <sup>2</sup>           | 1.048                                                         |
| Final R indexes [I ≥ 2σ (I)]                | R <sub>1</sub> = 0.0349, wR <sub>2</sub> = 0.0926             |
| Final R indexes [all data]                  | R <sub>1</sub> = 0.0377, wR <sub>2</sub> = 0.0953             |
| Largest diff. peak/hole / e Å <sup>-3</sup> | 0.28/-0.18                                                    |

**Table S10.** Fractional Atomic Coordinates ( $\times 10^4$ ) and Equivalent Isotropic Displacement Parameters ( $\text{\AA}^2 \times 10^3$ ) for **8**.  $U_{\text{eq}}$  is defined as 1/3 of the trace of the orthogonalised  $U_{\text{II}}$  tensor.

| Atom | <i>x</i>    | <i>y</i>     | <i>z</i>     | $U(\text{eq})$ |
|------|-------------|--------------|--------------|----------------|
| O1   | 616.1 (9)   | 3712.2 (8)   | 6748.2 (8)   | 41.1 (2)       |
| O2   | 1319.5 (7)  | 4628.1 (7)   | 4759.0 (7)   | 29.89 (19)     |
| O3   | 3192.8 (7)  | 4964.9 (8)   | 3677.3 (8)   | 33.7 (2)       |
| O4   | 1631.8 (9)  | 5202.8 (11)  | 8123.5 (9)   | 50.7 (3)       |
| O5   | 89.9 (8)    | 6123.0 (9)   | 7269.3 (8)   | 40.2 (2)       |
| C1   | 1628.1 (10) | 5644.1 (10)  | 5998.1 (10)  | 25.9 (2)       |
| C2   | 1139.9 (10) | 4575.5 (10)  | 5907.9 (11)  | 28.0 (2)       |
| C3   | 2097.9 (10) | 5528.3 (10)  | 3744.5 (10)  | 26.4 (2)       |
| C4   | 4047.6 (10) | 5807.4 (11)  | 3602.2 (11)  | 31.5 (3)       |
| C5   | 4374.8 (11) | 6765.4 (12)  | 2275.0 (11)  | 33.1 (3)       |
| C6   | 5446.3 (12) | 6745.4 (14)  | 1554.7 (13)  | 42.7 (3)       |
| C7   | 5721.8 (13) | 7630.1 (16)  | 341.3 (14)   | 50.8 (4)       |
| C8   | 4924.9 (15) | 8530.4 (15)  | -163.2 (14)  | 53.2 (4)       |
| C9   | 3857.5 (13) | 8560.1 (14)  | 549.9 (13)   | 44.6 (3)       |
| C10  | 3573.8 (11) | 7693.9 (11)  | 1774.0 (11)  | 32.4 (3)       |
| C11  | 2439.8 (10) | 7801.4 (11)  | 2571.9 (11)  | 29.6 (2)       |
| C12  | 2270.9 (9)  | 6726.7 (10)  | 3859.1 (10)  | 24.0 (2)       |
| C13  | 1355.2 (9)  | 6822.0 (10)  | 4877.3 (10)  | 24.7 (2)       |
| C14  | 2977.0 (10) | 5528.7 (12)  | 5777.0 (11)  | 30.5 (3)       |
| C15  | 3402.6 (10) | 6416.5 (11)  | 4403.6 (11)  | 28.0 (2)       |
| C16  | 4044.9 (11) | 7502.3 (13)  | 4324.1 (13)  | 38.9 (3)       |
| C17  | 1139.7 (10) | 5616.0 (11)  | 7260.8 (11)  | 30.7 (3)       |
| C18  | -437.7 (13) | 6212.5 (16)  | 8406.1 (13)  | 49.0 (4)       |
| O6   | 3027.0 (11) | 623.3 (10)   | 2703.3 (10)  | 57.9 (3)       |
| O7   | 1720.3 (8)  | -172.8 (8)   | 4401.5 (8)   | 36.9 (2)       |
| O8   | 2057.5 (8)  | -1408.1 (7)  | 6372.1 (8)   | 35.5 (2)       |
| O9   | 4734.4 (10) | 2569.5 (12)  | 3105.7 (12)  | 65.7 (3)       |
| O10  | 3101.3 (9)  | 3259.1 (9)   | 2349.4 (9)   | 46.5 (2)       |
| C19  | 2959.2 (10) | 1434.2 (11)  | 4207.2 (11)  | 30.4 (3)       |
| C20  | 2610.2 (12) | 616.3 (11)   | 3679.7 (12)  | 35.5 (3)       |
| C21  | 1381.2 (10) | -420.7 (11)  | 5690.9 (11)  | 29.3 (2)       |
| C22  | 2468.0 (11) | -1078.3 (11) | 7240.2 (12)  | 34.2 (3)       |
| C23  | 1501.8 (11) | -1330.0 (11) | 8338.4 (11)  | 33.6 (3)       |
| C24  | 1527.0 (13) | -2362.4 (13) | 9457.8 (13)  | 42.9 (3)       |
| C25  | 599.0 (15)  | -2638.4 (14) | 10427.0 (13) | 48.8 (4)       |
| C26  | -365.3 (16) | -1886.6 (15) | 10279.6 (13) | 52.7 (4)       |
| C27  | -392.7 (14) | -845.9 (14)  | 9172.8 (13)  | 47.4 (3)       |
| C28  | 541.5 (11)  | -542.1 (11)  | 8196.5 (11)  | 33.7 (3)       |
| C29  | 524.3 (11)  | 637.7 (11)   | 7009.0 (11)  | 33.1 (3)       |
| C30  | 1534.8 (10) | 664.9 (10)   | 5998.9 (10)  | 26.6 (2)       |

**Table S10.** Fractional Atomic Coordinates ( $\times 10^4$ ) and Equivalent Isotropic Displacement Parameters ( $\text{\AA}^2 \times 10^3$ ) for **8**.  $U_{\text{eq}}$  is defined as 1/3 of the trace of the orthogonalised  $U_{\text{II}}$  tensor.

| Atom | $x$         | $y$         | $z$         | $U(\text{eq})$ |
|------|-------------|-------------|-------------|----------------|
| C31  | 1821.8 (10) | 1840.3 (10) | 4814.4 (11) | 30.0 (2)       |
| C32  | 3598.6 (10) | 643.0 (12)  | 5302.6 (12) | 35.7 (3)       |
| C33  | 2687.3 (10) | 300.7 (11)  | 6498.1 (11) | 31.0 (3)       |
| C34  | 2943.2 (14) | 941.6 (14)  | 7257.7 (14) | 46.9 (3)       |
| C35  | 3716.5 (12) | 2475.2 (12) | 3168.1 (12) | 38.4 (3)       |
| C36  | 3741.1 (18) | 4270.5 (15) | 1306.0 (15) | 62.5 (5)       |

**Table S11.** Anisotropic Displacement Parameters ( $\text{\AA}^2 \times 10^3$ ) for **8**. The Anisotropic displacement factor exponent takes the form:  $-2\pi^2[h^2a^2U_{11}+2hka*b*U_{12}+\dots]$ .

| Atom | $U_{11}$ | $U_{22}$  | $U_{33}$ | $U_{23}$  | $U_{13}$  | $U_{12}$  |
|------|----------|-----------|----------|-----------|-----------|-----------|
| O1   | 51.8 (6) | 30.3 (5)  | 33.7 (5) | -7.9 (4)  | -1.1 (4)  | -11.4 (4) |
| O2   | 34.1 (4) | 26.1 (4)  | 31.0 (4) | -14.8 (3) | -0.7 (3)  | -6.5 (3)  |
| O3   | 32.8 (4) | 28.3 (4)  | 41.1 (5) | -18.9 (4) | -0.8 (4)  | 2.8 (3)   |
| O4   | 47.6 (6) | 73.2 (7)  | 30.7 (5) | -21.7 (5) | -12.2 (4) | 10.9 (5)  |
| O5   | 33.8 (5) | 59.4 (6)  | 31.9 (5) | -25.8 (4) | -3.8 (4)  | 6.4 (4)   |
| C1   | 25.7 (5) | 27.1 (6)  | 26.0 (5) | -12.4 (5) | -4.6 (4)  | -0.1 (4)  |
| C2   | 28.5 (6) | 24.7 (6)  | 29.3 (6) | -10.5 (5) | -5.3 (4)  | 1.1 (4)   |
| C3   | 28.6 (6) | 24.7 (5)  | 25.9 (5) | -12.1 (4) | -1.8 (4)  | -1.8 (4)  |
| C4   | 24.8 (6) | 35.1 (6)  | 34.2 (6) | -15.7 (5) | -3.9 (5)  | 2.8 (5)   |
| C5   | 30.6 (6) | 37.9 (7)  | 32.5 (6) | -18.3 (5) | -0.6 (5)  | -3.2 (5)  |
| C6   | 34.0 (7) | 52.8 (8)  | 41.6 (7) | -24.3 (7) | 1.8 (6)   | -0.3 (6)  |
| C7   | 42.3 (8) | 64.2 (10) | 42.4 (8) | -26.6 (7) | 12.3 (6)  | -8.9 (7)  |
| C8   | 57.9 (9) | 54.7 (9)  | 32.8 (7) | -11.8 (7) | 9.3 (6)   | -9.5 (7)  |
| C9   | 47.9 (8) | 42.8 (8)  | 33.5 (7) | -10.5 (6) | 1.0 (6)   | -2.9 (6)  |
| C10  | 34.1 (6) | 32.7 (6)  | 30.2 (6) | -14.6 (5) | -0.5 (5)  | -5.2 (5)  |
| C11  | 30.8 (6) | 26.0 (6)  | 29.3 (6) | -10.1 (5) | -3.5 (5)  | -0.5 (4)  |
| C12  | 23.8 (5) | 22.9 (5)  | 26.4 (5) | -11.8 (4) | -3.5 (4)  | -1.2 (4)  |
| C13  | 25.2 (5) | 22.3 (5)  | 27.9 (5) | -12.4 (4) | -3.4 (4)  | -0.1 (4)  |
| C14  | 25.4 (6) | 37.6 (6)  | 29.4 (6) | -14.7 (5) | -6.9 (5)  | 1.6 (5)   |
| C15  | 23.6 (5) | 32.2 (6)  | 29.4 (6) | -14.4 (5) | -4.1 (4)  | -1.4 (4)  |
| C16  | 32.5 (6) | 47.2 (8)  | 42.5 (7) | -24.0 (6) | -3.2 (5)  | -11.1 (6) |
| C17  | 32.3 (6) | 32.1 (6)  | 28.6 (6) | -13.7 (5) | -4.5 (5)  | -3.0 (5)  |
| C18  | 46.1 (8) | 69.1 (10) | 37.7 (7) | -32.5 (7) | 0.5 (6)   | 4.4 (7)   |
| O6   | 81.5 (8) | 50.6 (6)  | 43.4 (6) | -30.2 (5) | 17.7 (5)  | -21.9 (6) |
| O7   | 45.8 (5) | 35.4 (5)  | 32.5 (4) | -17.7 (4) | -0.8 (4)  | -12.9 (4) |
| O8   | 43.1 (5) | 24.2 (4)  | 38.8 (5) | -14.9 (4) | -4.5 (4)  | 3.3 (4)   |
| O9   | 38.5 (6) | 71.8 (8)  | 63.9 (7) | -11.9 (6) | 7.4 (5)   | -20.5 (5) |
| O10  | 54.3 (6) | 36.4 (5)  | 37.3 (5) | -6.9 (4)  | 1.5 (4)   | -15.3 (4) |
| C19  | 28.7 (6) | 27.6 (6)  | 34.2 (6) | -15.2 (5) | 2.6 (5)   | -4.3 (5)  |
| C20  | 41.4 (7) | 29.7 (6)  | 35.0 (6) | -16.5 (5) | 3.0 (5)   | -5.4 (5)  |
| C21  | 30.1 (6) | 27.3 (6)  | 29.6 (6) | -12.2 (5) | -1.6 (5)  | -4.0 (5)  |

**Table S11.** Anisotropic Displacement Parameters ( $\text{\AA}^2 \times 10^3$ ) for **8**. The Anisotropic displacement factor exponent takes the form:  $-2\pi^2[h^2a^*2U_{11}+2hka^*b^*U_{12}+\dots]$ .

| Atom | U <sub>11</sub> | U <sub>22</sub> | U <sub>33</sub> | U <sub>23</sub> | U <sub>13</sub> | U <sub>12</sub> |
|------|-----------------|-----------------|-----------------|-----------------|-----------------|-----------------|
| C22  | 30.8 (6)        | 30.8 (6)        | 37.8 (7)        | -11.2 (5)       | -8.9 (5)        | 3.3 (5)         |
| C23  | 38.3 (7)        | 30.4 (6)        | 31.1 (6)        | -11.3 (5)       | -7.2 (5)        | -4.4 (5)        |
| C24  | 52.3 (8)        | 36.3 (7)        | 36.5 (7)        | -9.2 (6)        | -14.4 (6)       | -3.4 (6)        |
| C25  | 73.1 (11)       | 40.0 (8)        | 27.8 (6)        | -8.0 (6)        | -7.9 (6)        | -11.6 (7)       |
| C26  | 69.0 (10)       | 47.5 (8)        | 32.7 (7)        | -15.5 (6)       | 11.2 (7)        | -12.1 (7)       |
| C27  | 52.6 (9)        | 42.1 (8)        | 39.4 (7)        | -16.8 (6)       | 8.7 (6)         | -1.8 (6)        |
| C28  | 40.2 (7)        | 29.4 (6)        | 30.4 (6)        | -13.7 (5)       | -0.7 (5)        | -4.0 (5)        |
| C29  | 32.7 (6)        | 28.7 (6)        | 33.4 (6)        | -12.7 (5)       | 1.5 (5)         | 2.0 (5)         |
| C30  | 25.6 (5)        | 23.4 (5)        | 30.0 (6)        | -12.2 (5)       | -2.2 (4)        | 0.3 (4)         |
| C31  | 31.4 (6)        | 23.7 (5)        | 32.4 (6)        | -12.2 (5)       | -0.2 (5)        | 0.3 (4)         |
| C32  | 25.5 (6)        | 35.6 (7)        | 43.3 (7)        | -15.5 (6)       | -2.3 (5)        | -2.9 (5)        |
| C33  | 27.7 (6)        | 30.3 (6)        | 33.9 (6)        | -12.7 (5)       | -4.7 (5)        | -2.4 (5)        |
| C34  | 51.3 (8)        | 50.7 (8)        | 43.8 (8)        | -21.8 (7)       | -9.6 (6)        | -15.4 (7)       |
| C35  | 39.9 (7)        | 36.8 (7)        | 37.8 (7)        | -19.3 (6)       | 6.8 (6)         | -10.7 (6)       |
| C36  | 88.1 (13)       | 44.3 (9)        | 39.9 (8)        | -8.8 (7)        | 10.8 (8)        | -26.9 (8)       |

**Table S12.** Bond Lengths for **8**.

| Atom | Atom | Length/ $\text{\AA}$ | Atom | Atom | Length/ $\text{\AA}$ |
|------|------|----------------------|------|------|----------------------|
| O1   | C2   | 1.1996 (15)          | O6   | C20  | 1.1933 (16)          |
| O2   | C2   | 1.3508 (14)          | O7   | C20  | 1.3593 (15)          |
| O2   | C3   | 1.4468 (13)          | O7   | C21  | 1.4447 (14)          |
| O3   | C3   | 1.4091 (14)          | O8   | C21  | 1.4046 (15)          |
| O3   | C4   | 1.4525 (15)          | O8   | C22  | 1.4564 (15)          |
| O4   | C17  | 1.1925 (15)          | O9   | C35  | 1.1959 (18)          |
| O5   | C17  | 1.3305 (15)          | O10  | C35  | 1.3246 (18)          |
| O5   | C18  | 1.4512 (15)          | O10  | C36  | 1.4464 (17)          |
| C1   | C2   | 1.5113 (16)          | C19  | C20  | 1.5141 (17)          |
| C1   | C13  | 1.5437 (15)          | C19  | C31  | 1.5483 (16)          |
| C1   | C14  | 1.5602 (15)          | C19  | C32  | 1.5546 (18)          |
| C1   | C17  | 1.5225 (15)          | C19  | C35  | 1.5253 (17)          |
| C3   | C12  | 1.5480 (15)          | C21  | C30  | 1.5475 (15)          |
| C4   | C5   | 1.5149 (17)          | C22  | C23  | 1.5107 (18)          |
| C4   | C15  | 1.5235 (16)          | C22  | C33  | 1.5218 (17)          |
| C5   | C6   | 1.3925 (18)          | C23  | C24  | 1.3910 (18)          |
| C5   | C10  | 1.4008 (18)          | C23  | C28  | 1.3998 (18)          |
| C6   | C7   | 1.386 (2)            | C24  | C25  | 1.382 (2)            |
| C7   | C8   | 1.380 (2)            | C25  | C26  | 1.380 (2)            |
| C8   | C9   | 1.387 (2)            | C26  | C27  | 1.387 (2)            |
| C9   | C10  | 1.3885 (18)          | C27  | C28  | 1.3896 (19)          |
| C10  | C11  | 1.5214 (16)          | C28  | C29  | 1.5242 (17)          |

**Table S12.** Bond Lengths for **8**.

| Atom | Atom | Length/Å    | Atom | Atom | Length/Å    |
|------|------|-------------|------|------|-------------|
| C11  | C12  | 1.5237 (15) | C29  | C30  | 1.5260 (15) |
| C12  | C13  | 1.5156 (14) | C30  | C31  | 1.5183 (16) |
| C12  | C15  | 1.5481 (15) | C30  | C33  | 1.5455 (16) |
| C14  | C15  | 1.5469 (16) | C32  | C33  | 1.5427 (17) |
| C15  | C16  | 1.5257 (17) | C33  | C34  | 1.5270 (18) |

**Table S13.** Bond Angles for **8**.

| Atom | Atom | Atom | Angle/°     | Atom | Atom | Atom | Angle/°     |
|------|------|------|-------------|------|------|------|-------------|
| C2   | O2   | C3   | 121.31 (9)  | C20  | O7   | C21  | 119.94 (9)  |
| C3   | O3   | C4   | 107.43 (8)  | C21  | O8   | C22  | 107.13 (8)  |
| C17  | O5   | C18  | 115.75 (10) | C35  | O10  | C36  | 115.93 (13) |
| C2   | C1   | C13  | 106.60 (9)  | C20  | C19  | C31  | 106.62 (10) |
| C2   | C1   | C14  | 107.56 (9)  | C20  | C19  | C32  | 109.08 (10) |
| C2   | C1   | C17  | 109.48 (9)  | C20  | C19  | C35  | 108.28 (10) |
| C13  | C1   | C14  | 105.33 (9)  | C31  | C19  | C32  | 104.61 (9)  |
| C17  | C1   | C13  | 115.20 (9)  | C35  | C19  | C31  | 115.60 (10) |
| C17  | C1   | C14  | 112.24 (9)  | C35  | C19  | C32  | 112.36 (10) |
| O1   | C2   | O2   | 118.51 (11) | O6   | C20  | O7   | 118.69 (12) |
| O1   | C2   | C1   | 126.19 (11) | O6   | C20  | C19  | 126.20 (12) |
| O2   | C2   | C1   | 115.30 (9)  | O7   | C20  | C19  | 115.09 (10) |
| O2   | C3   | C12  | 115.72 (9)  | O7   | C21  | C30  | 115.54 (9)  |
| O3   | C3   | O2   | 107.38 (9)  | O8   | C21  | O7   | 107.66 (9)  |
| O3   | C3   | C12  | 107.34 (9)  | O8   | C21  | C30  | 107.86 (9)  |
| O3   | C4   | C5   | 109.80 (10) | O8   | C22  | C23  | 108.16 (10) |
| O3   | C4   | C15  | 103.32 (9)  | O8   | C22  | C33  | 102.77 (9)  |
| C5   | C4   | C15  | 109.96 (10) | C23  | C22  | C33  | 110.57 (10) |
| C6   | C5   | C4   | 121.65 (12) | C24  | C23  | C22  | 121.01 (12) |
| C6   | C5   | C10  | 119.79 (12) | C24  | C23  | C28  | 119.96 (12) |
| C10  | C5   | C4   | 118.56 (11) | C28  | C23  | C22  | 118.94 (11) |
| C7   | C6   | C5   | 120.48 (14) | C25  | C24  | C23  | 120.67 (14) |
| C8   | C7   | C6   | 119.86 (13) | C26  | C25  | C24  | 119.64 (13) |
| C7   | C8   | C9   | 120.01 (14) | C25  | C26  | C27  | 120.14 (14) |
| C8   | C9   | C10  | 120.94 (14) | C26  | C27  | C28  | 120.98 (15) |
| C5   | C10  | C11  | 120.85 (11) | C23  | C28  | C29  | 121.00 (11) |
| C9   | C10  | C5   | 118.90 (12) | C27  | C28  | C23  | 118.57 (12) |
| C9   | C10  | C11  | 120.16 (12) | C27  | C28  | C29  | 120.42 (12) |
| C10  | C11  | C12  | 111.67 (10) | C28  | C29  | C30  | 110.85 (10) |
| C3   | C12  | C15  | 100.63 (9)  | C29  | C30  | C21  | 108.15 (9)  |
| C11  | C12  | C3   | 109.01 (9)  | C29  | C30  | C33  | 111.48 (10) |
| C11  | C12  | C15  | 111.74 (9)  | C31  | C30  | C21  | 110.23 (9)  |
| C13  | C12  | C3   | 110.21 (9)  | C31  | C30  | C29  | 120.20 (9)  |

**Table S13.** Bond Angles for **8**.

| Atom | Atom | Atom | Angle/°     | Atom | Atom | Atom | Angle/°     |
|------|------|------|-------------|------|------|------|-------------|
| C13  | C12  | C11  | 119.13 (9)  | C31  | C30  | C33  | 104.38 (9)  |
| C13  | C12  | C15  | 104.51 (9)  | C33  | C30  | C21  | 100.65 (9)  |
| C12  | C13  | C1   | 100.00 (8)  | C30  | C31  | C19  | 99.65 (9)   |
| C15  | C14  | C1   | 105.90 (9)  | C33  | C32  | C19  | 106.49 (9)  |
| C4   | C15  | C12  | 97.69 (9)   | C22  | C33  | C30  | 98.37 (9)   |
| C4   | C15  | C14  | 115.23 (10) | C22  | C33  | C32  | 113.86 (10) |
| C4   | C15  | C16  | 114.21 (10) | C22  | C33  | C34  | 114.15 (11) |
| C14  | C15  | C12  | 102.78 (9)  | C32  | C33  | C30  | 102.60 (9)  |
| C16  | C15  | C12  | 116.28 (10) | C34  | C33  | C30  | 115.66 (11) |
| C16  | C15  | C14  | 109.81 (10) | C34  | C33  | C32  | 111.16 (10) |
| O4   | C17  | O5   | 124.52 (11) | O9   | C35  | O10  | 124.55 (13) |
| O4   | C17  | C1   | 124.73 (11) | O9   | C35  | C19  | 124.15 (13) |
| O5   | C17  | C1   | 110.74 (10) | O10  | C35  | C19  | 111.30 (11) |

**Table S14.** Torsion Angles for **8**.

| A  | B   | C   | D   | Angle/°     | A   | B   | C   | D   | Angle/°     |
|----|-----|-----|-----|-------------|-----|-----|-----|-----|-------------|
| O2 | C3  | C12 | C11 | -146.09 (9) | O7  | C21 | C30 | C29 | 143.10 (10) |
| O2 | C3  | C12 | C13 | -13.60 (13) | O7  | C21 | C30 | C31 | 9.87 (14)   |
| O2 | C3  | C12 | C15 | 96.32 (10)  | O7  | C21 | C30 | C33 | -99.92 (11) |
| O3 | C3  | C12 | C11 | 94.06 (10)  | O8  | C21 | C30 | C29 | -96.42 (11) |
| O3 | C3  | C12 | C13 | -133.45 (9) | O8  | C21 | C30 | C31 | 130.36 (10) |
| O3 | C3  | C12 | C15 | -23.53 (11) | O8  | C21 | C30 | C33 | 20.57 (11)  |
| O3 | C4  | C5  | C6  | -           | O8  | C22 | C23 | C24 | 103.51 (13) |
| O3 | C4  | C5  | C10 | 73.17 (13)  | O8  | C22 | C23 | C28 | -73.05 (14) |
| O3 | C4  | C15 | C12 | -47.42 (10) | O8  | C22 | C33 | C30 | 47.50 (11)  |
| O3 | C4  | C15 | C14 | 60.67 (12)  | O8  | C22 | C33 | C32 | -60.32 (12) |
| O3 | C4  | C15 | C16 | -           | O8  | C22 | C33 | C34 | 170.57 (10) |
| C1 | C14 | C15 | C4  | -           | C19 | C32 | C33 | C22 | 117.52 (11) |
| C1 | C14 | C15 | C12 | -13.48 (11) | C19 | C32 | C33 | C30 | 12.34 (12)  |
| C1 | C14 | C15 | C16 | 110.87 (11) | C19 | C32 | C33 | C34 | -           |
| C2 | O2  | C3  | O3  | 93.77 (11)  | C20 | O7  | C21 | O8  | -88.06 (12) |
| C2 | O2  | C3  | C12 | -26.06 (14) | C20 | O7  | C21 | C30 | 32.54 (15)  |
| C2 | C1  | C13 | C12 | -76.69 (10) | C20 | C19 | C31 | C30 | 76.76 (11)  |
| C2 | C1  | C14 | C15 | 98.63 (10)  | C20 | C19 | C32 | C33 | -97.35 (11) |
| C2 | C1  | C17 | O4  | 98.49 (15)  | C20 | C19 | C35 | O9  | -           |
| C2 | C1  | C17 | O5  | -81.91 (12) | C20 | C19 | C35 | O10 | 109.91 (16) |
| C2 | C1  | C17 | O5  | -81.91 (12) | C20 | C19 | C35 | O10 | 70.23 (13)  |
| C3 | O2  | C2  | O1  | -           | C21 | O7  | C20 | O6  | 165.24 (13) |
| C3 | O2  | C2  | O1  | 169.88 (10) | C21 | O7  | C20 | O6  | 165.24 (13) |

**Table S14.** Torsion Angles for **8**.

| A   | B   | C   | D   | Angle/°     | A   | B   | C   | D   | Angle/°     |
|-----|-----|-----|-----|-------------|-----|-----|-----|-----|-------------|
| C3  | O2  | C2  | C1  | 10.46 (14)  | C21 | O7  | C20 | C19 | -15.99 (16) |
| C3  | O3  | C4  | C5  | -82.66 (11) | C21 | O8  | C22 | C23 | 80.56 (11)  |
| C3  | O3  | C4  | C15 | 34.60 (11)  | C21 | O8  | C22 | C33 | -36.41 (12) |
| C3  | C12 | C13 | C1  | 60.61 (10)  | C21 | C30 | C31 | C19 | -59.80 (11) |
| C3  | C12 | C15 | C4  | 41.80 (10)  | C21 | C30 | C33 | C22 | -40.25 (11) |
| C3  | C12 | C15 | C14 | -76.34 (10) | C21 | C30 | C33 | C32 | 76.60 (10)  |
| C3  | C12 | C15 | C16 | 163.69 (10) | C21 | C30 | C33 | C34 | -           |
| C4  | O3  | C3  | O2  | -131.35 (9) | C22 | O8  | C21 | O7  | 134.67 (9)  |
| C4  | O3  | C3  | C12 | -6.31 (11)  | C22 | O8  | C21 | C30 | 9.35 (12)   |
| C4  | C5  | C6  | C7  | 179.74 (13) | C22 | C23 | C24 | C25 | -           |
| C4  | C5  | C10 | C9  | 178.65 (12) | C22 | C23 | C28 | C27 | 173.87 (12) |
| C4  | C5  | C10 | C11 | 4.80 (17)   | C22 | C23 | C28 | C29 | -7.28 (18)  |
| C5  | C4  | C15 | C12 | 69.74 (11)  | C23 | C22 | C33 | C30 | -67.74 (11) |
| C5  | C4  | C15 | C14 | 177.82 (9)  | C23 | C22 | C33 | C32 | -           |
| C5  | C4  | C15 | C16 | -53.67 (13) | C23 | C22 | C33 | C34 | 55.33 (14)  |
| C5  | C6  | C7  | C8  | -0.7 (2)    | C23 | C24 | C25 | C26 | 0.4 (2)     |
| C5  | C10 | C11 | C12 | -6.34 (16)  | C23 | C28 | C29 | C30 | 10.92 (16)  |
| C6  | C5  | C10 | C9  | 1.74 (19)   | C24 | C23 | C28 | C27 | -2.72 (19)  |
| C6  | C5  | C10 | C11 | 174.81 (12) | C24 | C23 | C28 | C29 | 176.12 (12) |
| C6  | C7  | C8  | C9  | 1.0 (2)     | C24 | C25 | C26 | C27 | -1.3 (2)    |
| C7  | C8  | C9  | C10 | 0.1 (2)     | C25 | C26 | C27 | C28 | 0.1 (2)     |
| C8  | C9  | C10 | C5  | -1.5 (2)    | C26 | C27 | C28 | C23 | 1.9 (2)     |
| C8  | C9  | C10 | C11 | 175.10 (13) | C26 | C27 | C28 | C29 | -           |
| C9  | C10 | C11 | C12 | 177.16 (11) | C27 | C28 | C29 | C30 | 170.26 (12) |
| C10 | C5  | C6  | C7  | -0.7 (2)    | C28 | C23 | C24 | C25 | 1.6 (2)     |
| C10 | C11 | C12 | C3  | -67.09 (12) | C28 | C29 | C30 | C21 | 63.12 (13)  |
| C10 | C11 | C12 | C13 | 165.30 (10) | C28 | C29 | C30 | C31 | -           |
| C10 | C11 | C12 | C15 | 43.24 (12)  | C28 | C29 | C30 | C33 | -46.63 (13) |
| C11 | C12 | C13 | C1  | -172.35 (9) | C29 | C30 | C31 | C19 | 173.43 (10) |
| C11 | C12 | C15 | C4  | -73.77 (11) | C29 | C30 | C33 | C22 | 74.24 (11)  |
| C11 | C12 | C15 | C14 | 168.09 (9)  | C29 | C30 | C33 | C32 | -168.90 (9) |
| C11 | C12 | C15 | C16 | 48.12 (13)  | C29 | C30 | C33 | C34 | -47.72 (14) |
| C13 | C1  | C2  | O1  | 137.36 (12) | C31 | C19 | C20 | O6  | 138.70 (15) |
| C13 | C1  | C2  | O2  | 42.26 (12)  | C31 | C19 | C20 | O7  | -39.97 (14) |
| C13 | C1  | C14 | C15 | -14.78 (11) | C31 | C19 | C32 | C33 | 16.41 (12)  |
| C13 | C1  | C17 | O4  | 141.42 (13) | C31 | C19 | C35 | O9  | 130.61 (15) |



**Table S14.** Torsion Angles for **8**.

| A   | B   | C   | D   | Angle/°     | A   | B   | C   | D   | Angle/°     |
|-----|-----|-----|-----|-------------|-----|-----|-----|-----|-------------|
| C13 | C1  | C17 | O5  | 38.18 (14)  | C31 | C19 | C35 | O10 | -49.25 (15) |
| C13 | C12 | C15 | C4  | 156.11 (9)  | C31 | C30 | C33 | C22 | -154.54 (9) |
| C13 | C12 | C15 | C14 | 37.96 (11)  | C31 | C30 | C33 | C32 | -37.69 (11) |
| C13 | C12 | C15 | C16 | -82.01 (12) | C31 | C30 | C33 | C34 | 83.49 (12)  |
| C14 | C1  | C2  | O1  | 110.08 (13) | C32 | C19 | C20 | O6  | -           |
|     |     |     |     |             |     |     |     |     | 108.85 (16) |
| C14 | C1  | C2  | O2  | -70.30 (12) | C32 | C19 | C20 | O7  | 72.47 (13)  |
| C14 | C1  | C13 | C12 | 37.40 (10)  | C32 | C19 | C31 | C30 | -38.73 (11) |
| C14 | C1  | C17 | O4  | -20.88 (17) | C32 | C19 | C35 | O9  | 10.64 (18)  |
| C14 | C1  | C17 | O5  | 158.72 (10) | C32 | C19 | C35 | O10 | -           |
|     |     |     |     |             |     |     |     |     | 169.22 (10) |
| C15 | C4  | C5  | C6  | 139.73 (12) | C33 | C22 | C23 | C24 | -           |
|     |     |     |     |             |     |     |     |     | 144.68 (12) |
| C15 | C4  | C5  | C10 | -39.87 (15) | C33 | C22 | C23 | C28 | 38.77 (15)  |
| C15 | C12 | C13 | C1  | -46.74 (10) | C33 | C30 | C31 | C19 | 47.52 (11)  |
| C17 | C1  | C2  | O1  | -12.14 (16) | C35 | C19 | C20 | O6  | 13.71 (19)  |
| C17 | C1  | C2  | O2  | 167.49 (9)  | C35 | C19 | C20 | O7  | -           |
|     |     |     |     |             |     |     |     |     | 164.96 (11) |
| C17 | C1  | C13 | C12 | 161.65 (9)  | C35 | C19 | C31 | C30 | -           |
|     |     |     |     |             |     |     |     |     | 162.85 (10) |
| C17 | C1  | C14 | C15 | -           | C35 | C19 | C32 | C33 | 142.57 (10) |
|     |     |     |     | 140.88 (10) |     |     |     |     |             |
| C18 | O5  | C17 | O4  | 2.98 (19)   | C36 | O10 | C35 | O9  | 1.5 (2)     |
| C18 | O5  | C17 | C1  | -           | C36 | O10 | C35 | C19 | -           |
|     |     |     |     | 176.63 (11) |     |     |     |     | 178.63 (11) |

**Table S15.** Hydrogen Atom Coordinates ( $\text{\AA} \times 10^4$ ) and Isotropic Displacement Parameters ( $\text{\AA}^2 \times 10^3$ ) for **8**.

| Atom | x       | y       | z       | U(eq) |
|------|---------|---------|---------|-------|
| H3   | 1810.94 | 5747.92 | 2964.6  | 32    |
| H4   | 4740.01 | 5358.06 | 3931.12 | 38    |
| H6   | 5986.73 | 6127.23 | 1894.12 | 51    |
| H7   | 6449.95 | 7617.12 | -137.16 | 61    |
| H8   | 5105.38 | 9123.6  | -990.26 | 64    |
| H9   | 3318.66 | 9175.35 | 199.53  | 54    |
| H11A | 1791.45 | 7823.53 | 2166.36 | 36    |
| H11B | 2436.96 | 8575.77 | 2648.73 | 36    |
| H13A | 569.06  | 6803.07 | 4729.17 | 30    |
| H13B | 1454.31 | 7567.55 | 4977.74 | 30    |
| H14A | 3304.14 | 5763.19 | 6324.01 | 37    |
| H14B | 3208.67 | 4680.02 | 5937.42 | 37    |
| H16A | 4755.17 | 7212.02 | 4654.05 | 58    |
| H16B | 3556.68 | 7882.85 | 4802.08 | 58    |

**Table S15.** Hydrogen Atom Coordinates ( $\text{\AA}\times 10^4$ ) and Isotropic Displacement Parameters ( $\text{\AA}^2\times 10^3$ ) for **8**.

| Atom | x        | y        | z        | U(eq) |
|------|----------|----------|----------|-------|
| H16C | 4231.06  | 8102.56  | 3465.56  | 58    |
| H18A | -1153.19 | 6678.44  | 8287.63  | 74    |
| H18B | 91.62    | 6626.99  | 8621.81  | 74    |
| H18C | -604.35  | 5391.85  | 9068.71  | 74    |
| H21  | 556.45   | -676.67  | 5963.73  | 35    |
| H22  | 3184.27  | -1530.21 | 7496.26  | 41    |
| H24  | 2181.95  | -2877.44 | 9555.87  | 51    |
| H25  | 624.5    | -3334.6  | 11182.59 | 59    |
| H26  | -1004.94 | -2080.02 | 10930.66 | 63    |
| H27  | -1053.04 | -338.62  | 9081.73  | 57    |
| H29A | 574.8    | 1352.56  | 7176.66  | 40    |
| H29B | -209.36  | 689.76   | 6722.39  | 40    |
| H31A | 1948.46  | 2537.35  | 4983.61  | 36    |
| H31B | 1217.27  | 2051.4   | 4305.16  | 36    |
| H32A | 3919.92  | -102.51  | 5230.35  | 43    |
| H32B | 4234.61  | 1114.23  | 5307.66  | 43    |
| H34A | 2343.96  | 733.49   | 7988.16  | 70    |
| H34B | 2957.51  | 1826.98  | 6759.67  | 70    |
| H34C | 3690.55  | 671.45   | 7507.84  | 70    |
| H36A | 3248.49  | 4702.8   | 694.85   | 94    |
| H36B | 4417.22  | 3952.67  | 937.85   | 94    |
| H36C | 3986.67  | 4834.43  | 1585.69  | 94    |

## 5. References

- [1] A. Dupeux, E. Gentilini and V. Michelet, *J. Org. Chem.*, 2023, **88**, 9439–9446.
- [2] S. B. Wagh, Y.-C. Hsu and R.-S. Liu, *ACS Catal*, 2016, **6**, 7160–7166.
- [3] M. Gao, Q. Gao, X. Hao, Y. Wu, Q. Zhang, G. Liu and R. Liu, *Org. Lett.*, 2020, **22**, 1139–1143.
- [4] X. Tarrach, J. Yang, M. Soleiman-Beigi and S. Díez-González, *Catalysts*, 2023, **13**, 648
- [5] B. M. Trost and G. J. Tanoury, *J. Am. Chem. Soc.*, 1988, **110**, 1636–1638.
- [6] **Fieser work-up:** To work up a reaction containing x g lithium aluminum hydride: 1) Dilute with ether and cool to 0°C, 2) Slowly add x mL water, 3) Add x mL 15 % aqueous sodium hydroxide, 4) Add 3x mL water, 5) Warm to RT and stir 15 min, 6) Add some anhydrous magnesium sulfate, 7) Stir 15 min and filter to remove salt.
- [7] O. V. Dolomanov, L. J. Bourhis, R. J. Gildea, J. A. K. Howard and H. Puschmann, *J. Appl. Cryst.*, 2009, **42**, 339-341.
- [8] G. M. Sheldrick, *Acta Cryst.*, 2015, **A71**, 3-8.
- [9] G. M. Sheldrick, *Acta Cryst.*, 2015, **C71**, 3-8.

## 6. HPLC Spectra

- Dimethyl-4a-methyl-4,4a,5,9b-tetrahydro-1*H*-1,5-epoxycyclopenta[*b*]cyclopropanaphthalene-3,3(2*H*)-dicarboxylate (**3b**)  
HPLC: (OD-H, *i*PrOH/n-hexane = 70/30, flow rate = 1.0 mL/min, I = 225 nm) tR = 6.3

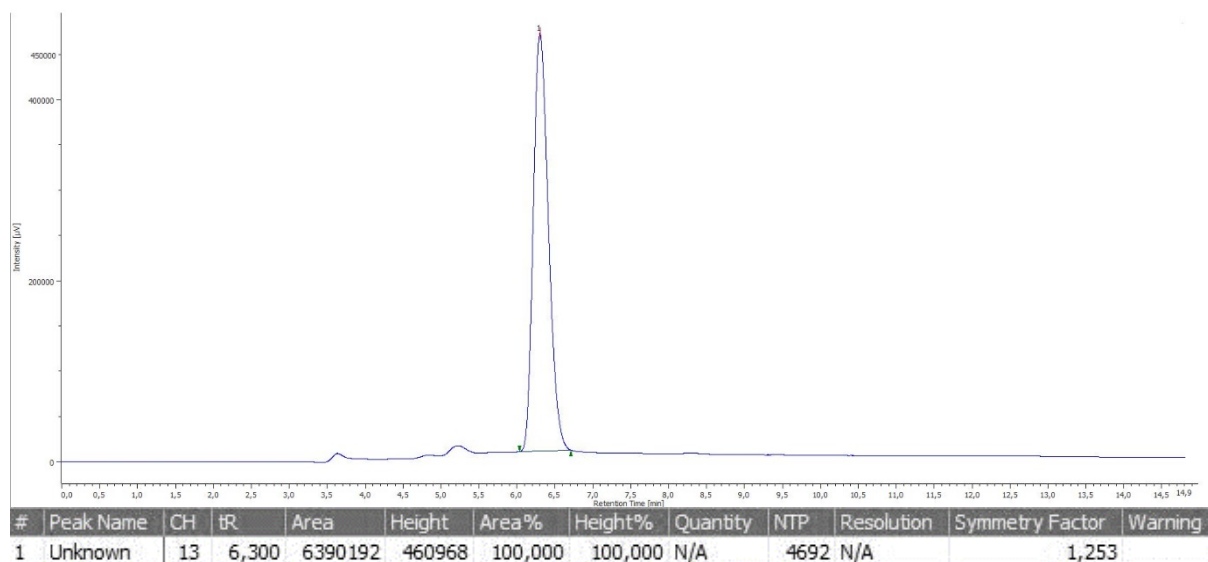

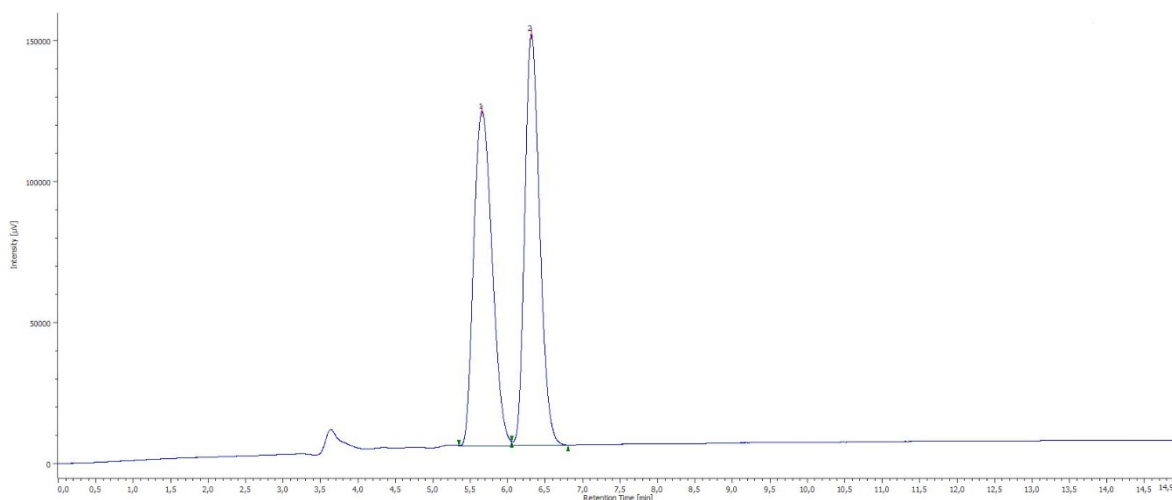

| # | Peak Name | CH | tR    | Area    | Height | Area%  | Height% | Quantity | NTP  | Resolution | Symmetry Factor | Warning |
|---|-----------|----|-------|---------|--------|--------|---------|----------|------|------------|-----------------|---------|
| 1 | Unknown   | 13 | 5,653 | 2023973 | 118605 | 50,109 | 44,854  | N/A      | 2376 | 1,597      | 1,228           |         |
| 2 | Unknown   | 13 | 6,313 | 2015198 | 145818 | 49,891 | 55,146  | N/A      | 4792 | N/A        | 1,230           |         |

## 7. NMR Spectra

— 7.26 CDCl<sub>3</sub>

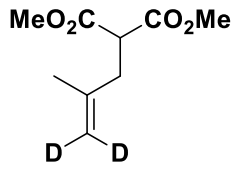

H<sup>1</sup>, CDCl<sub>3</sub>, 400 MHz

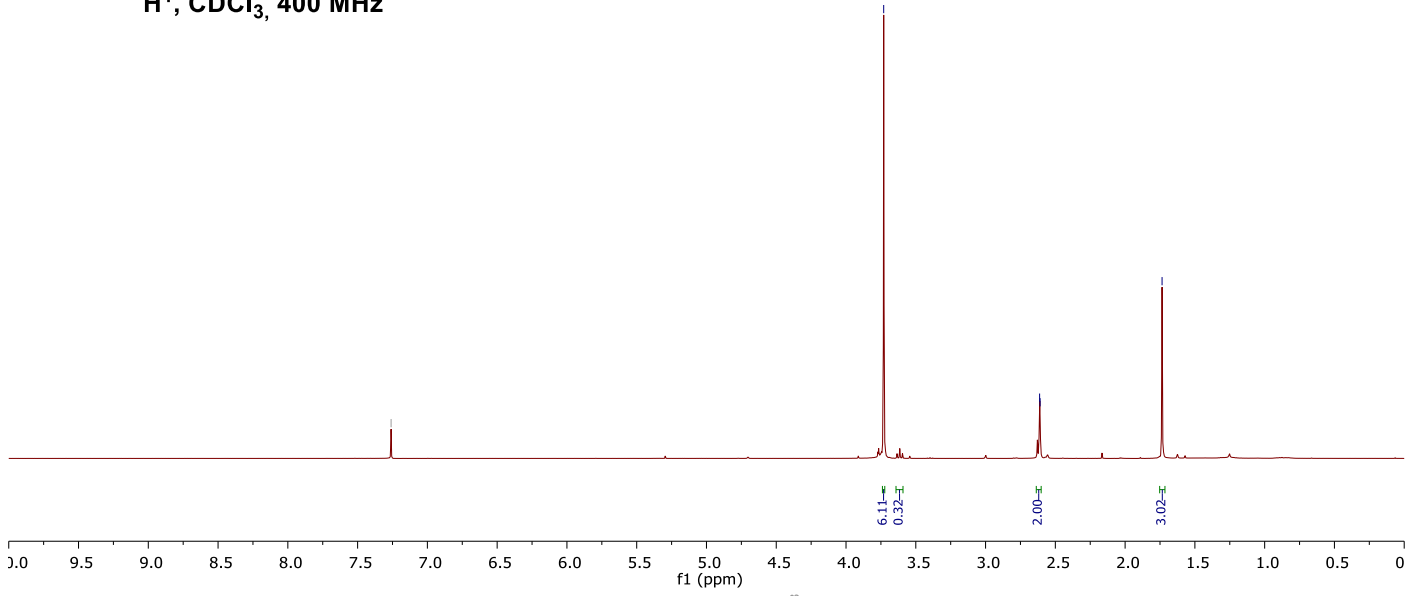

— 169.6

— 141.6

— 77.2 CDCl<sub>3</sub>

— 52.7

— 50.5

— 36.6

— 36.5

— 22.3

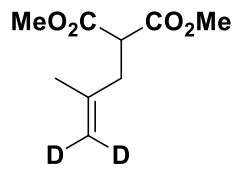

C<sup>13</sup>, CDCl<sub>3</sub>, 101 MHz

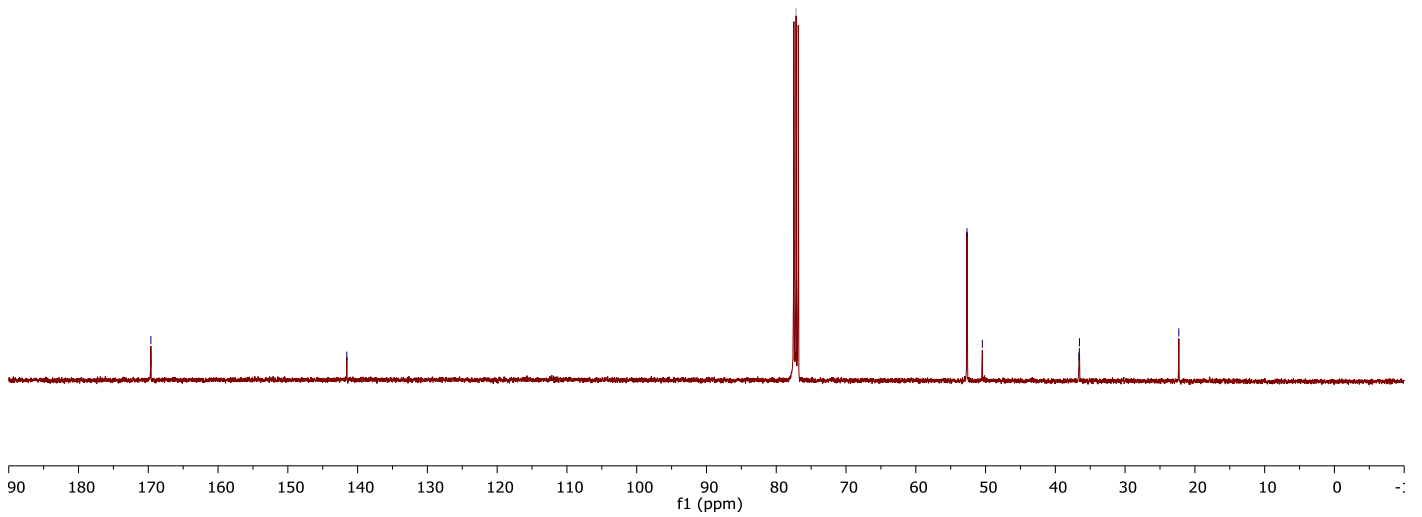

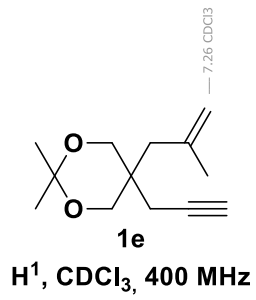

4.94  
 4.93  
 4.93  
 4.79  
 4.79  
 4.79  
 4.79  
 3.72  
 3.69  
 3.67  
 3.64  
 2.45  
 2.44  
 2.12  
 2.04  
 1.79  
 1.79  
 1.42  
 1.40

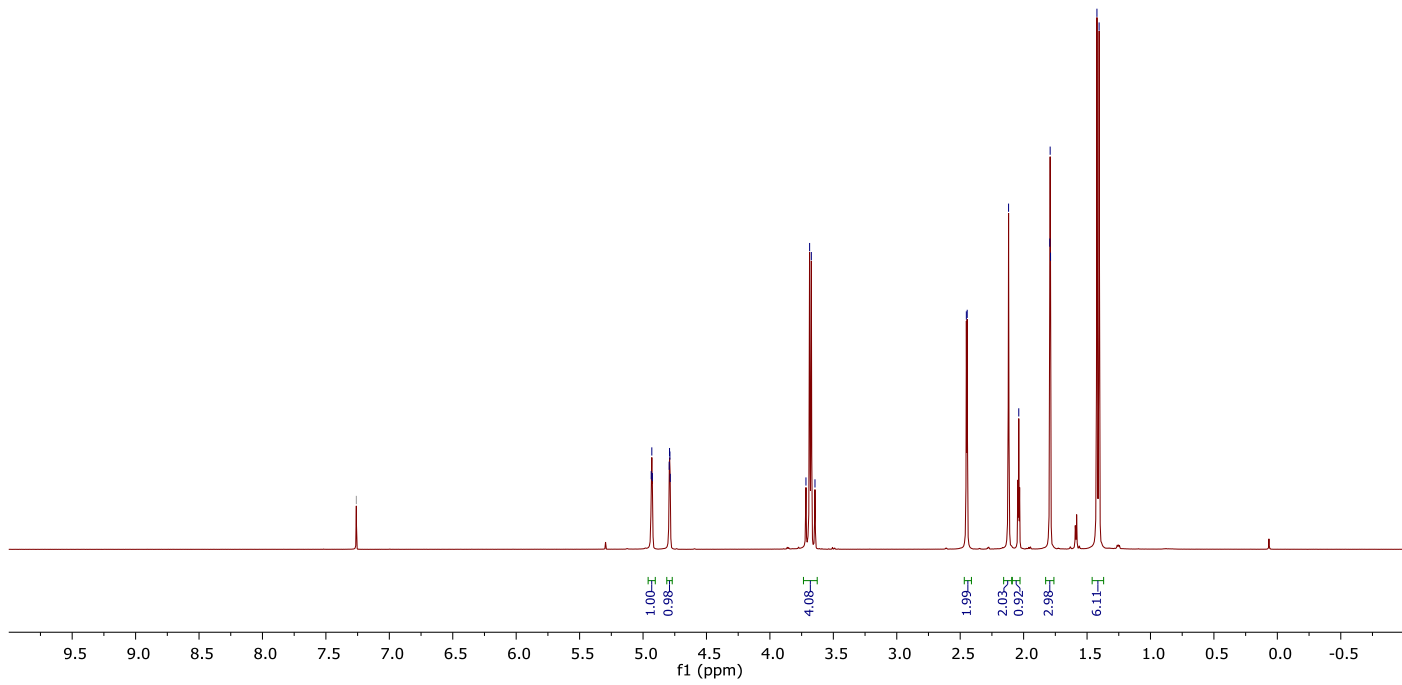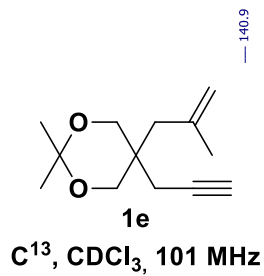

140.9  
 115.7  
 98.2  
 81.3  
 77.2  $CDCl_3$   
 71.4  
 67.2  
 39.9  
 36.1  
 26.5  
 25.3  
 22.6  
 21.5

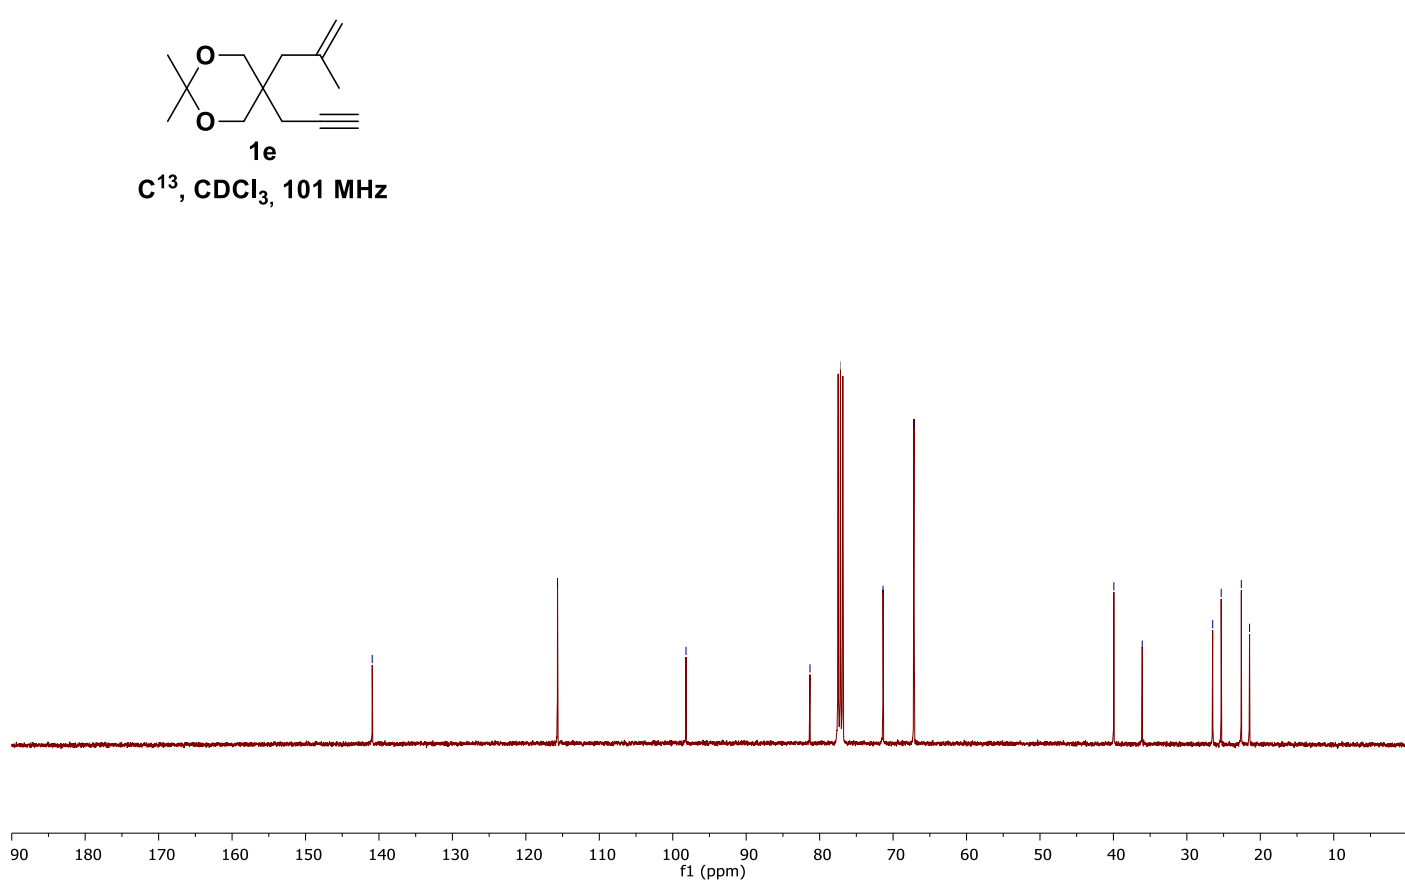

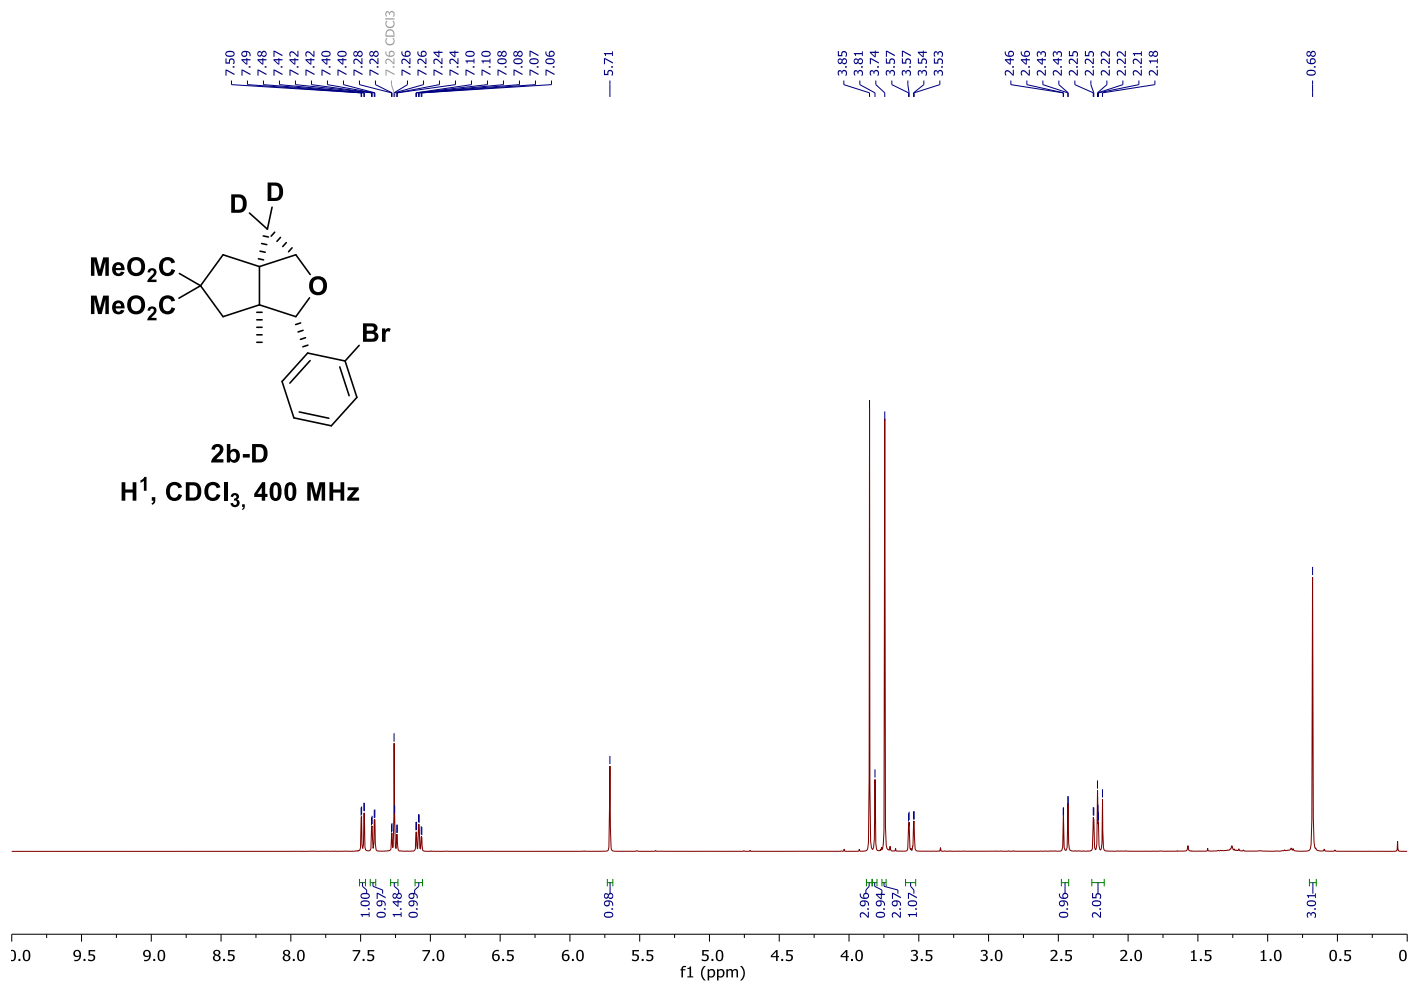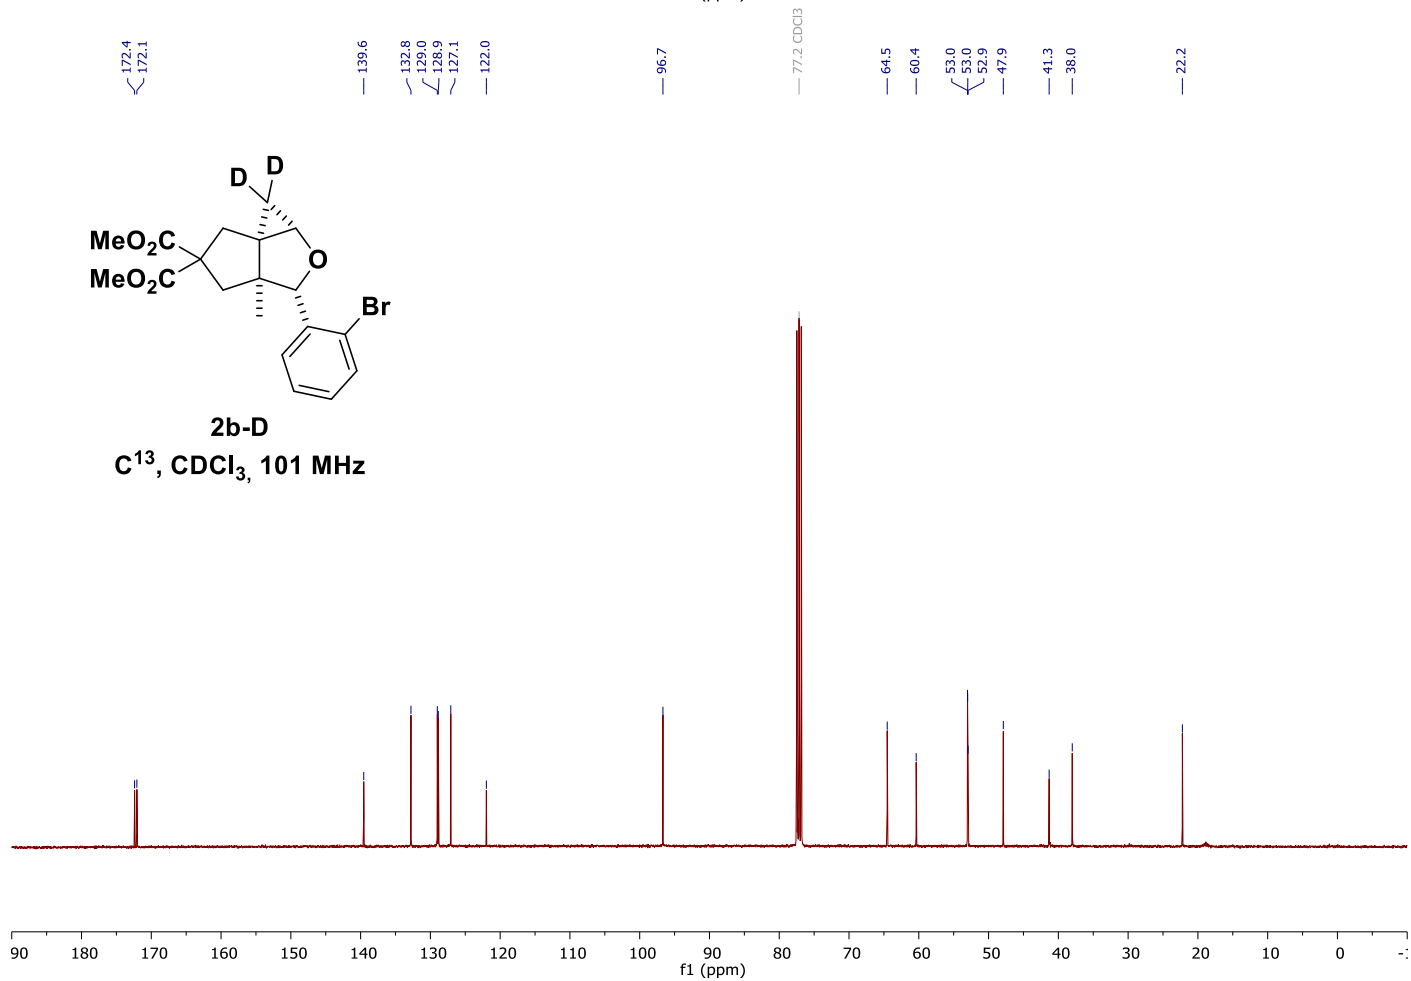

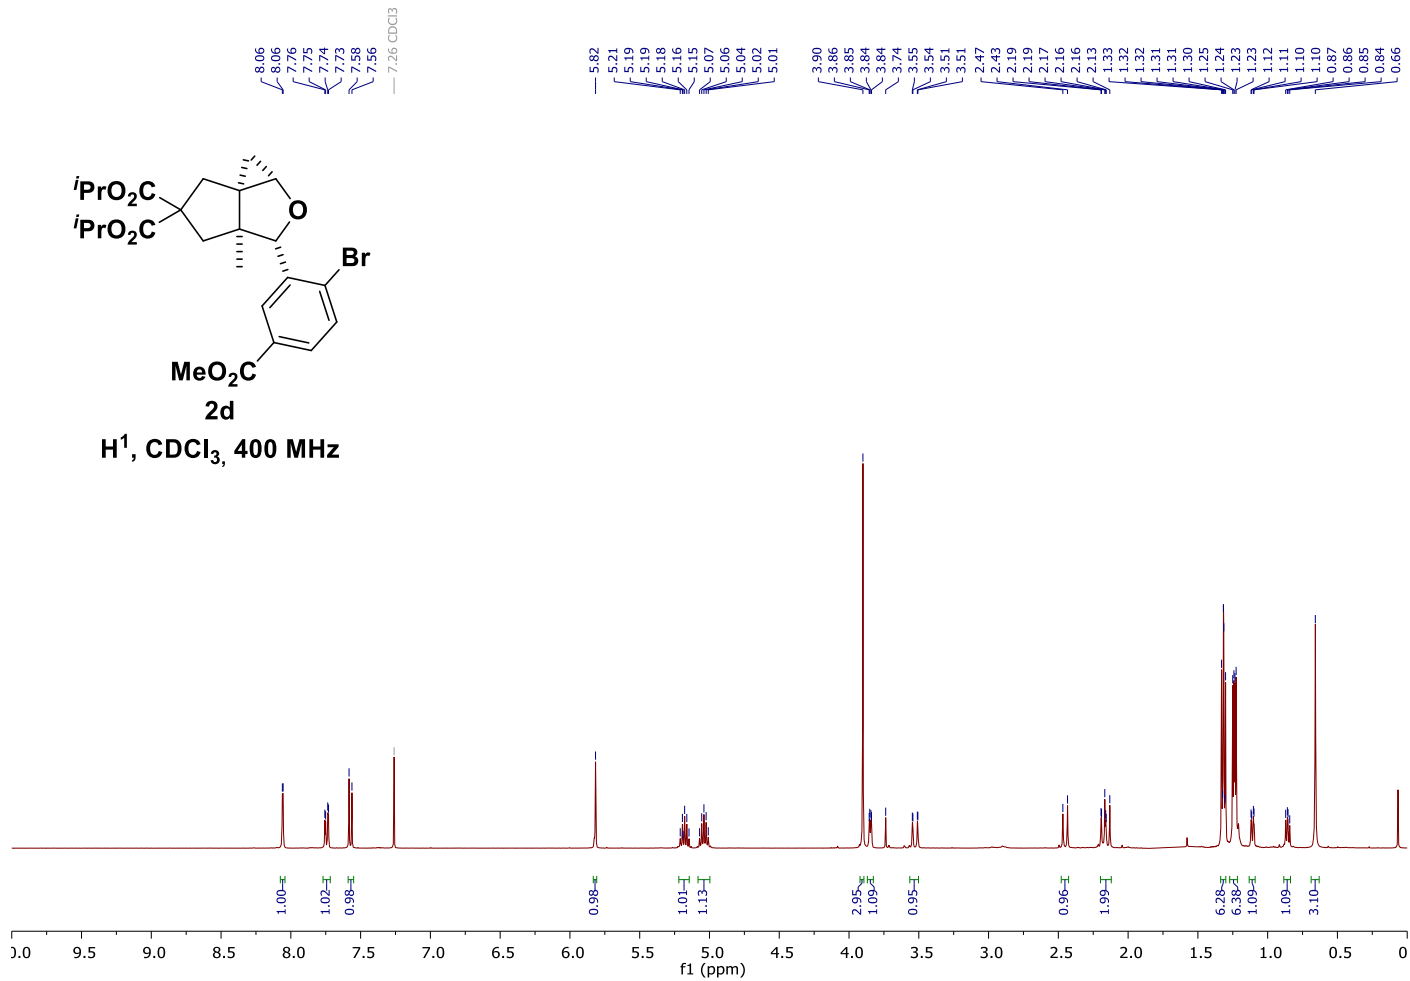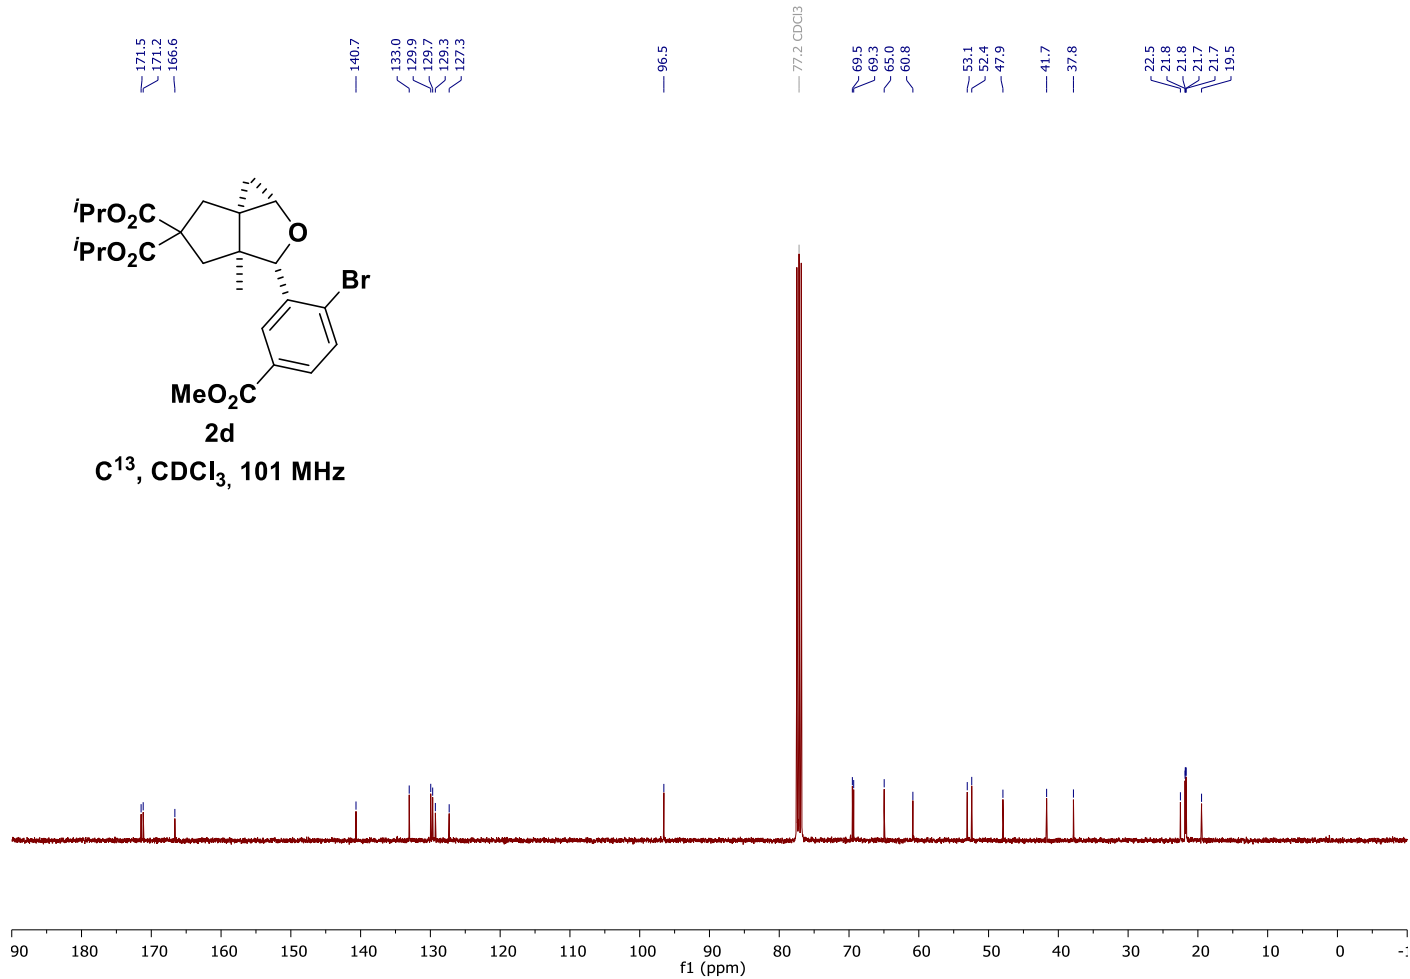



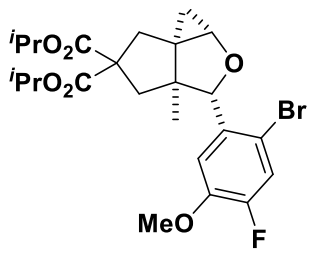

2e

$^1\text{H}$ ,  $\text{CDCl}_3$ , 400 MHz

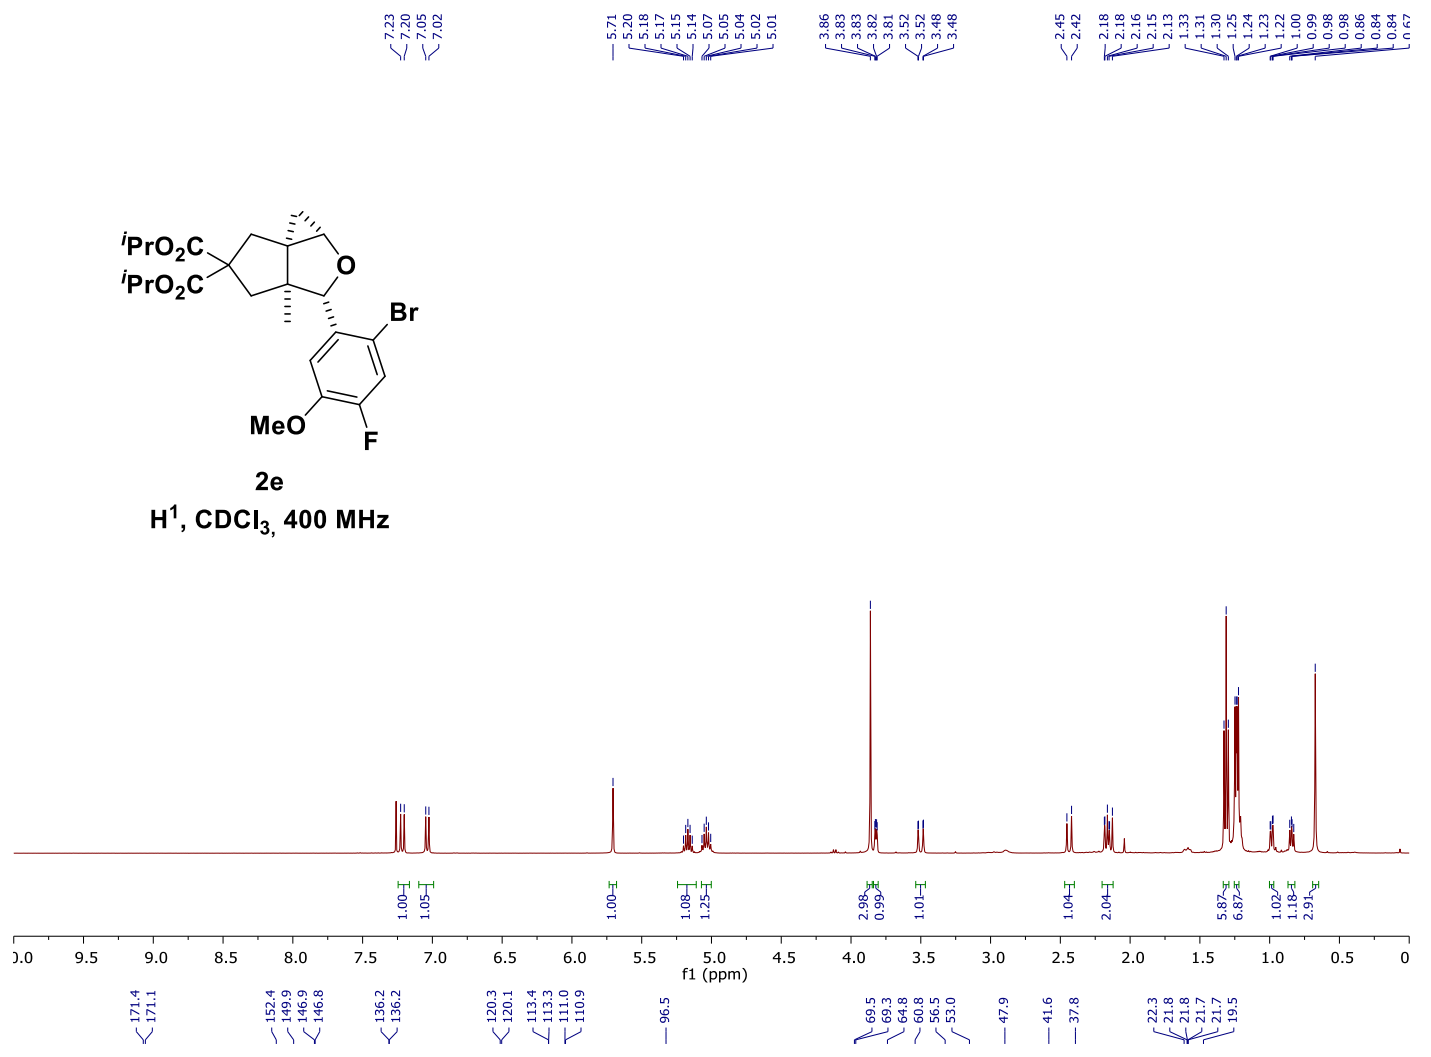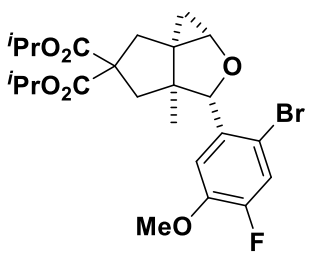

2e

$^{13}\text{C}$ ,  $\text{CDCl}_3$ , 101 MHz

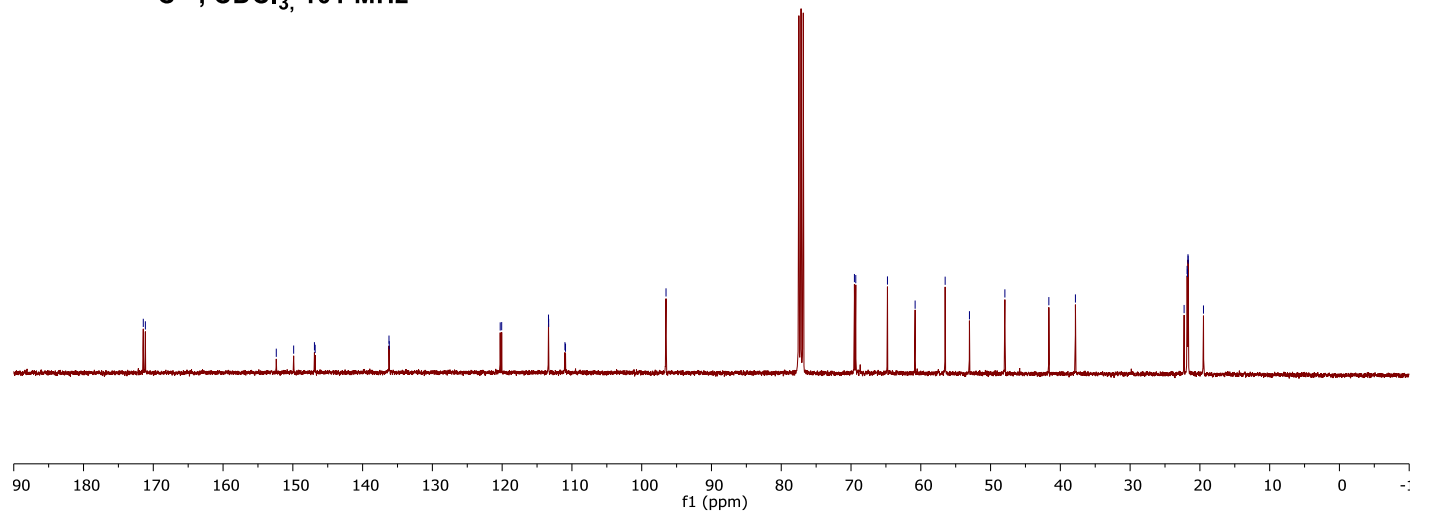

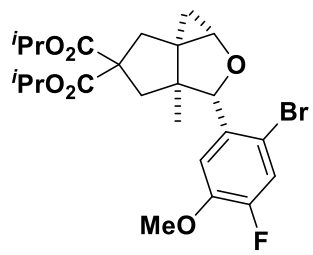

2e

F<sup>19</sup>, CDCl<sub>3</sub>, 376 MHz

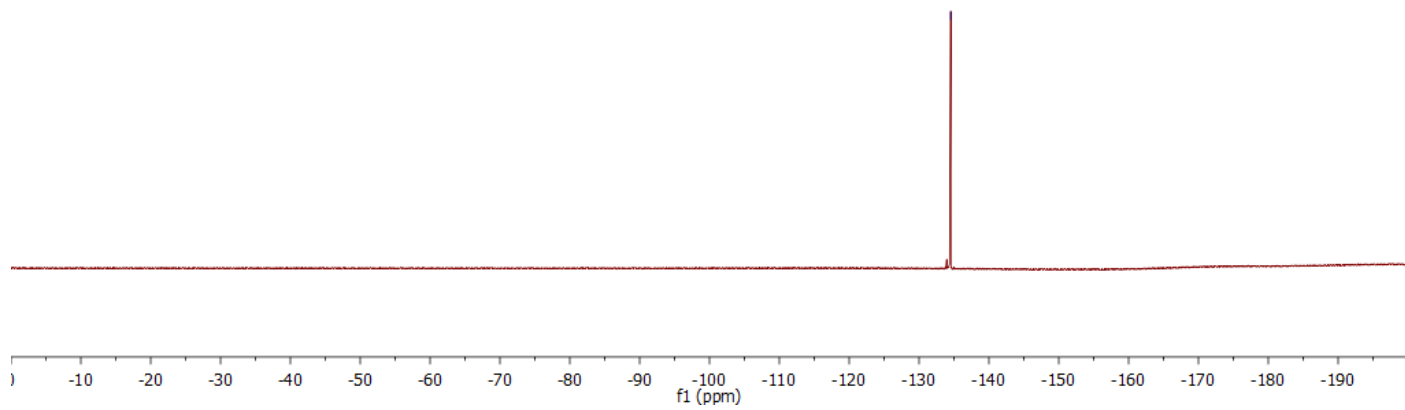

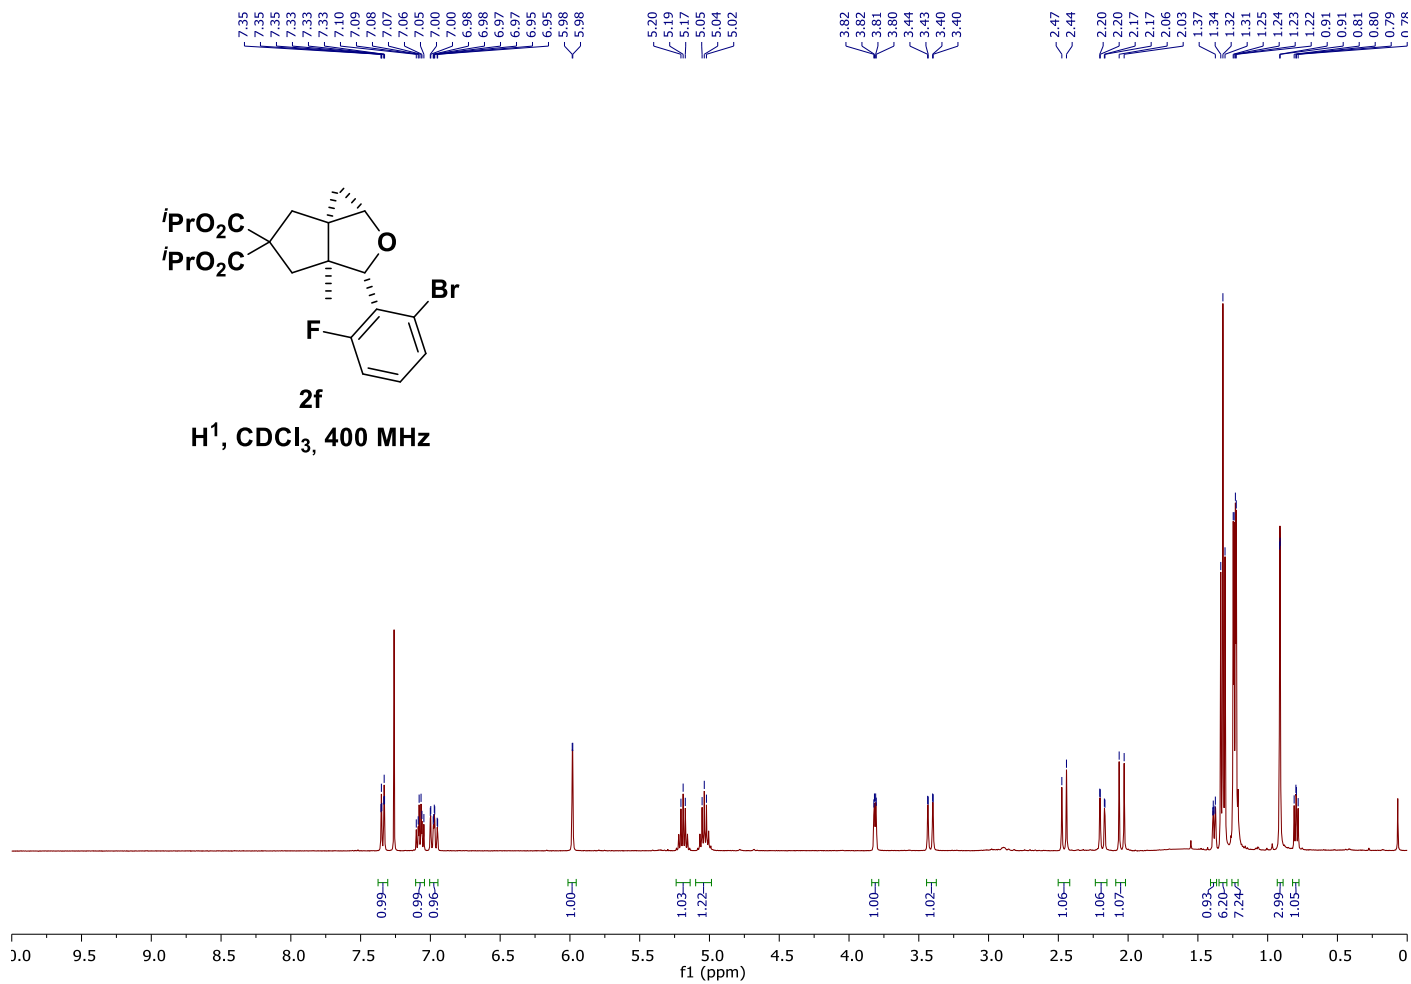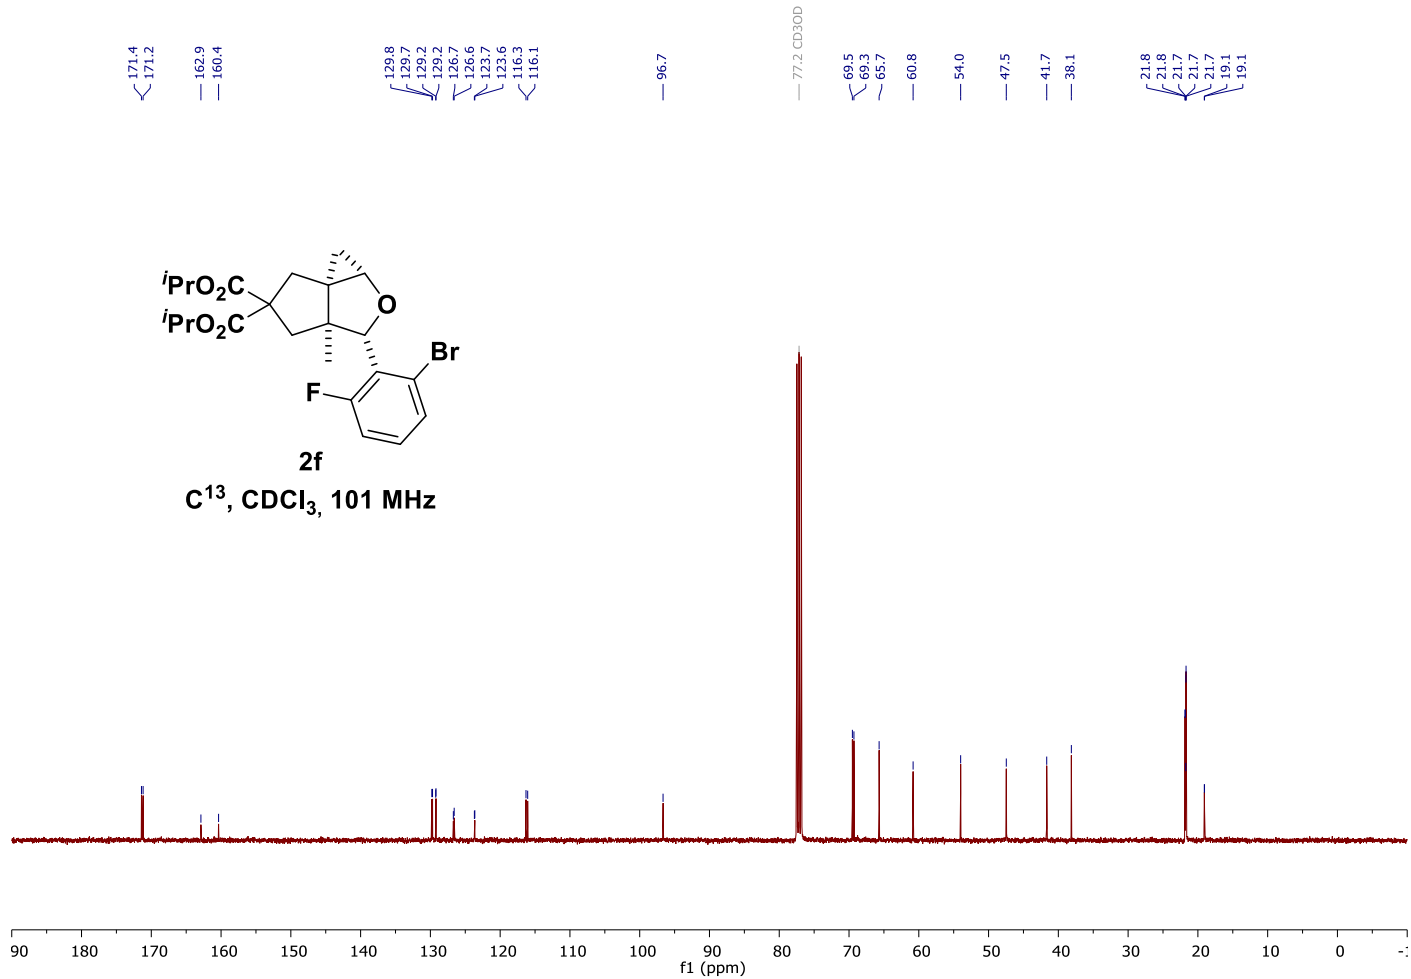

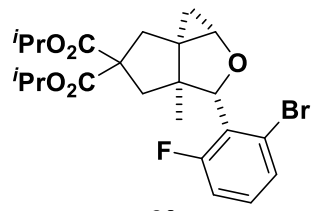

2f

F<sup>19</sup>, CDCl<sub>3</sub>, 376 MHz

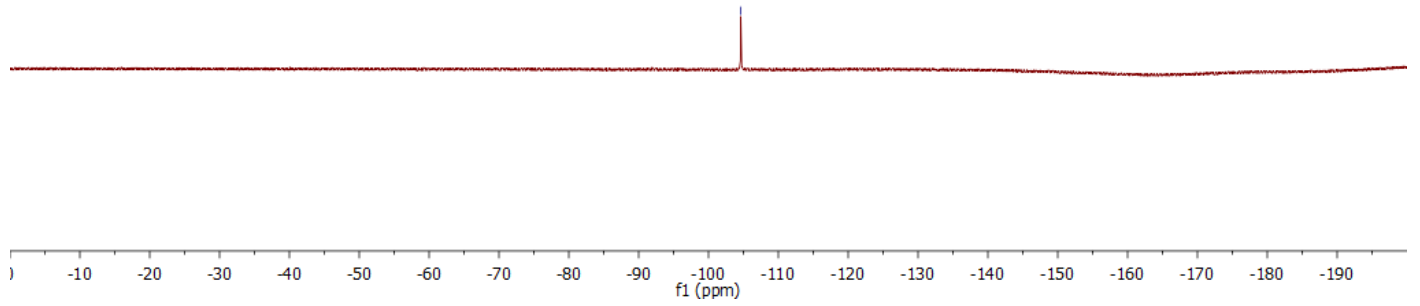

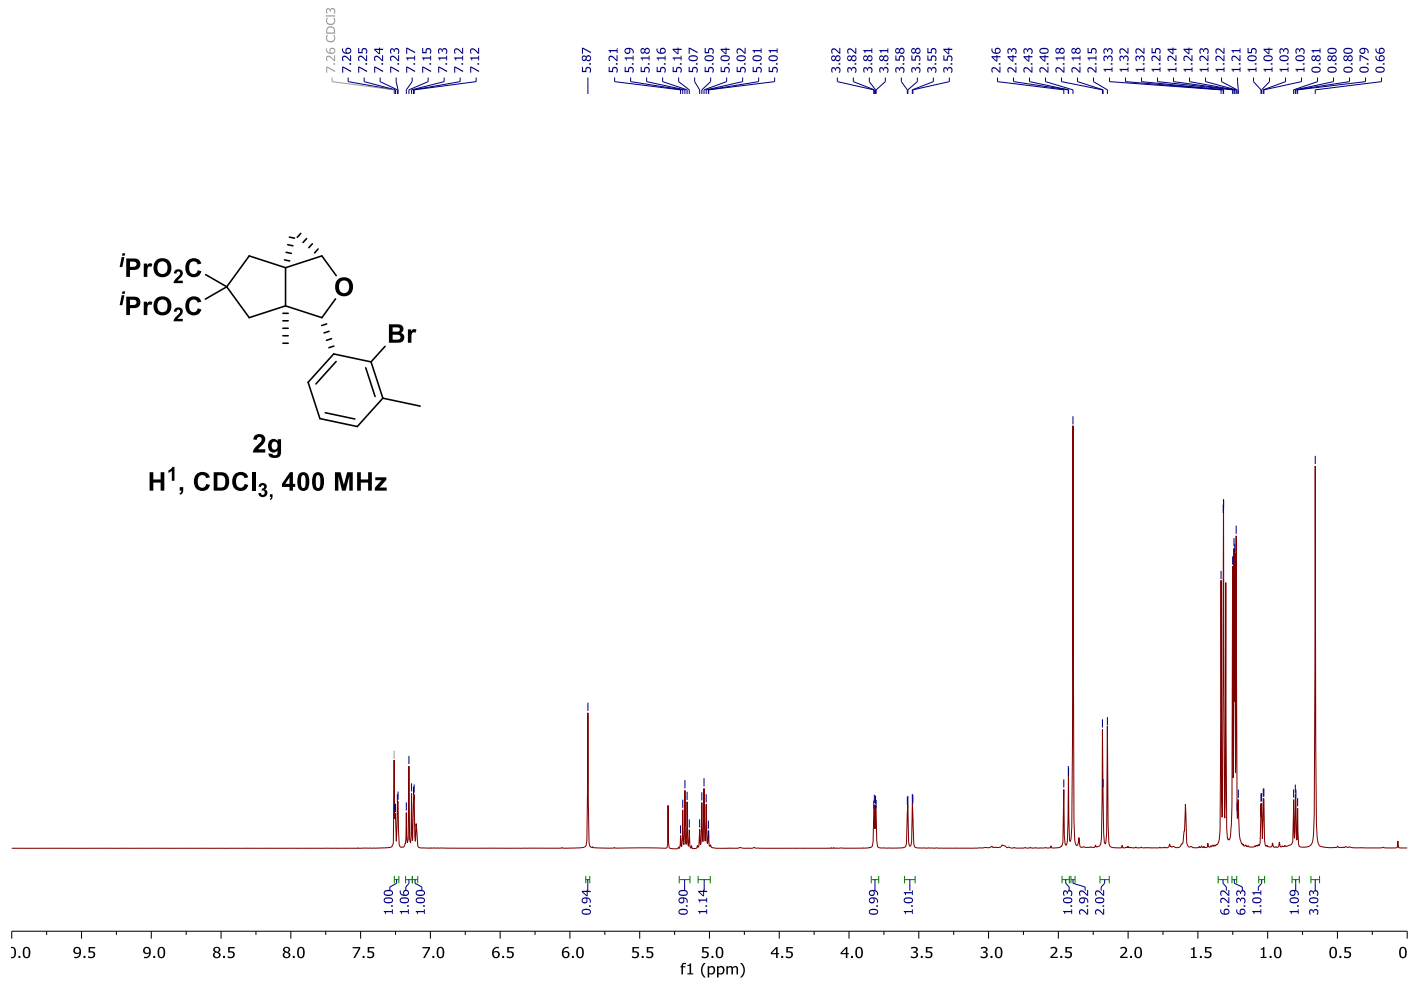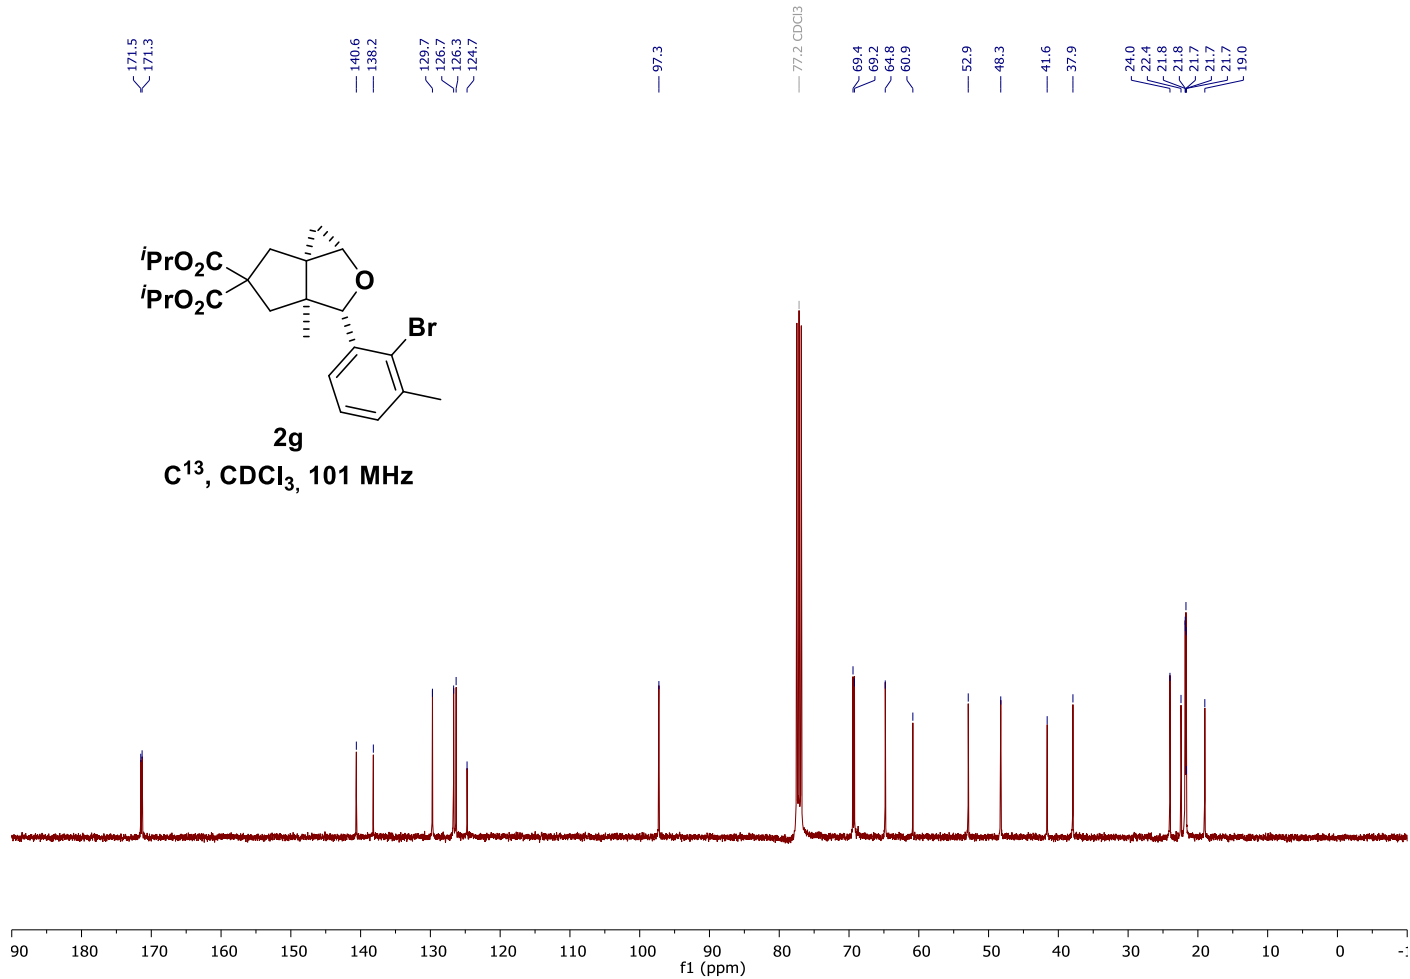

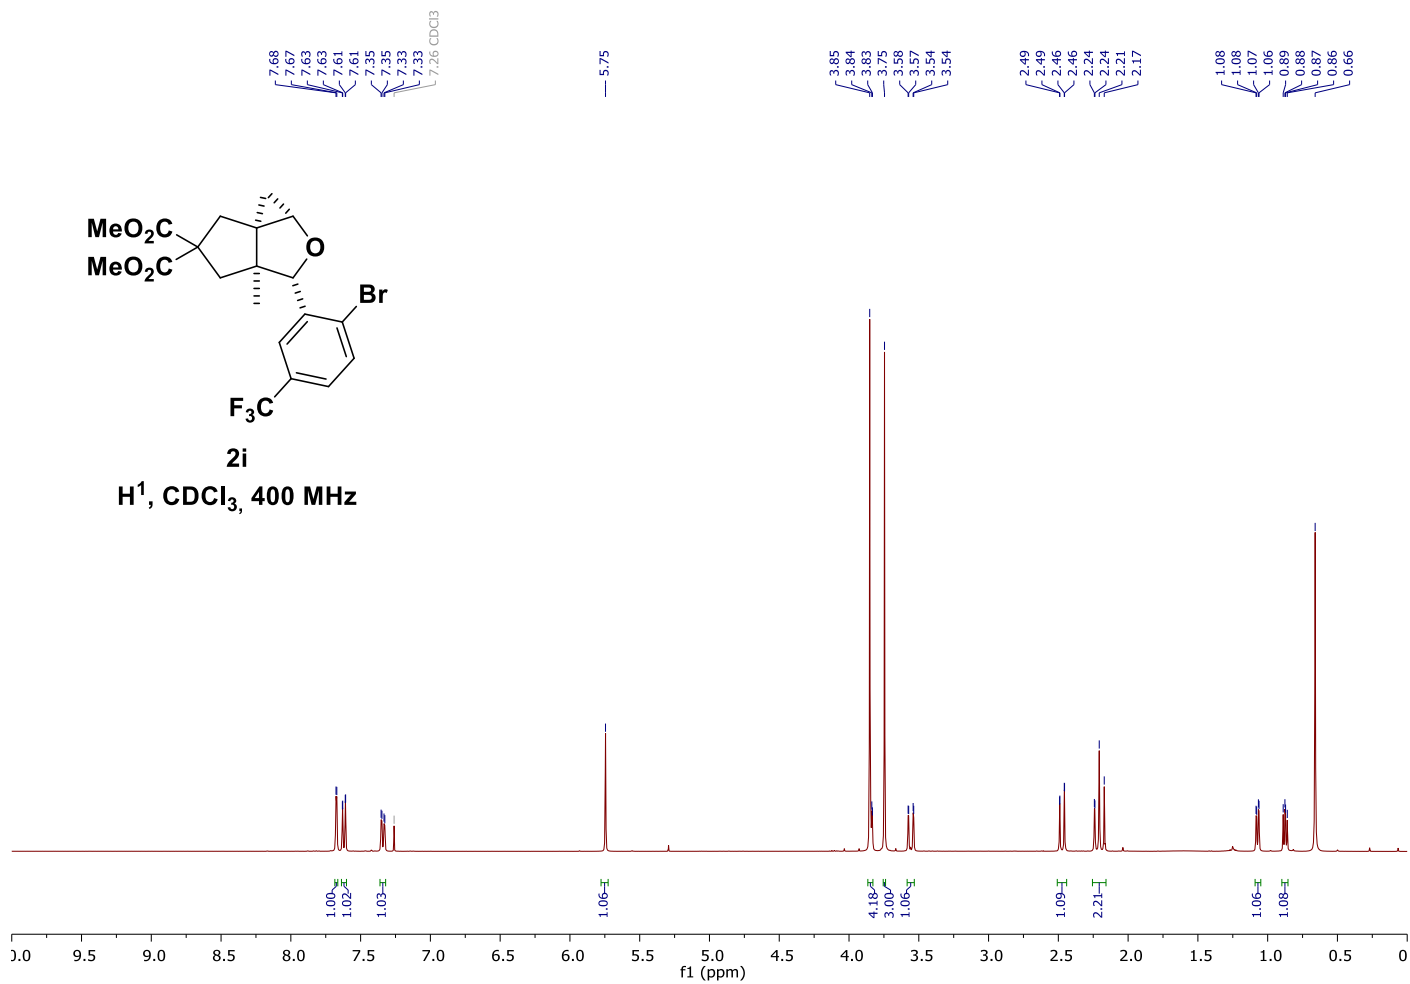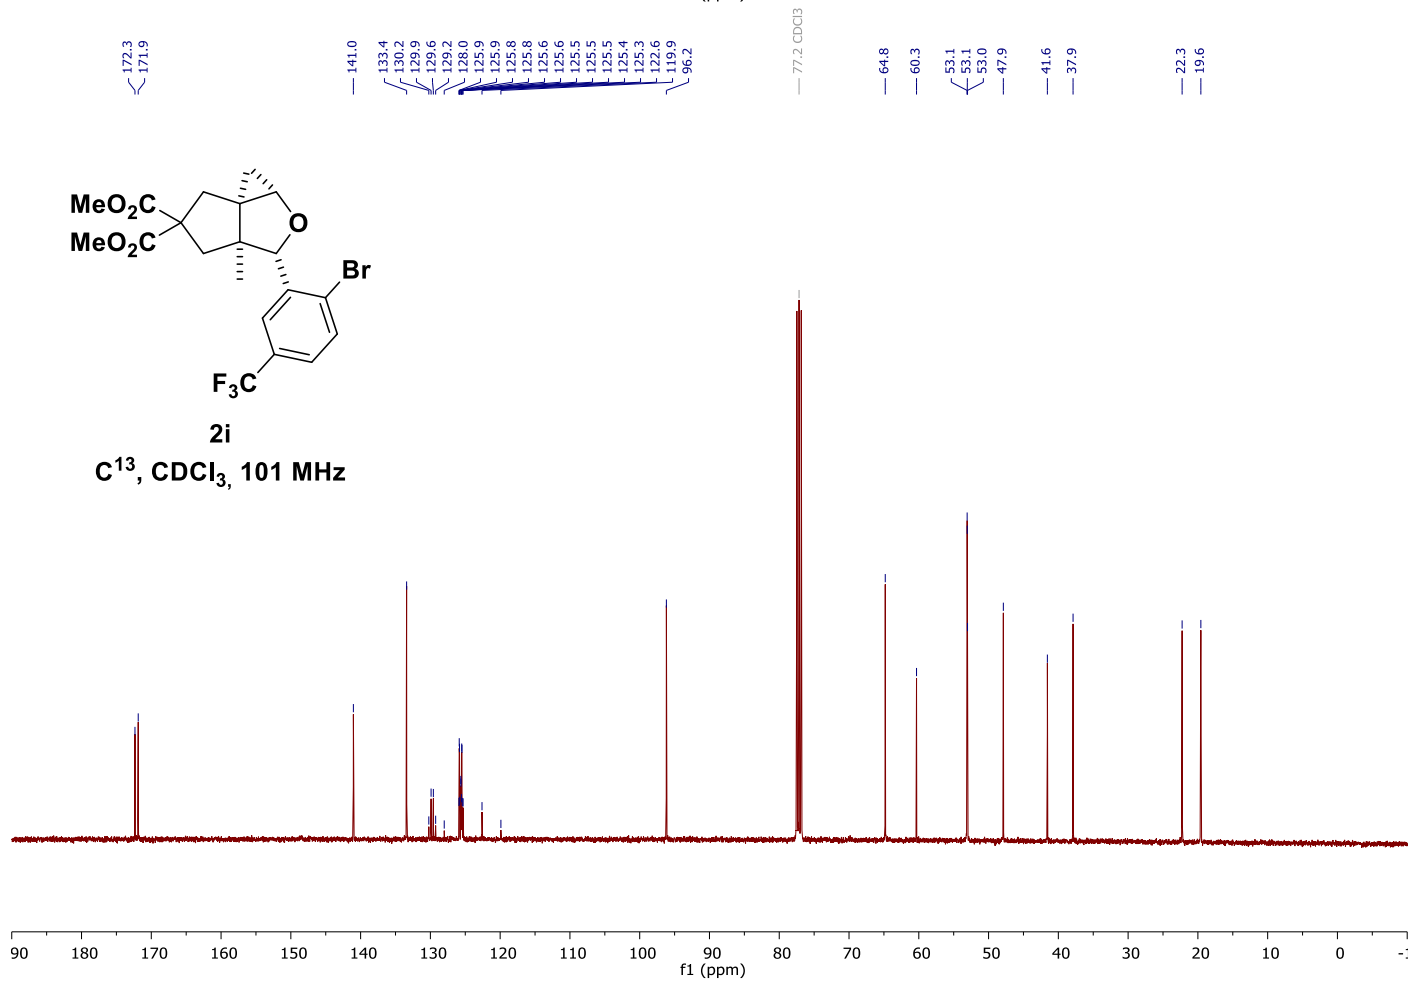

— 62.69

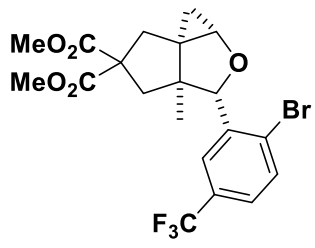

2i

F<sup>19</sup>, CDCl<sub>3</sub>, 376 MHz

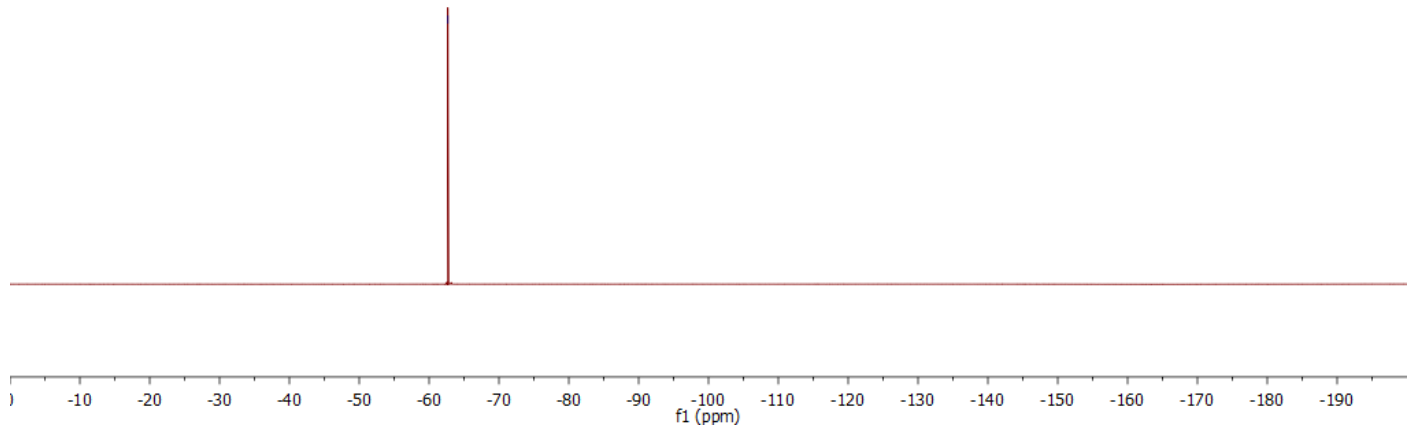

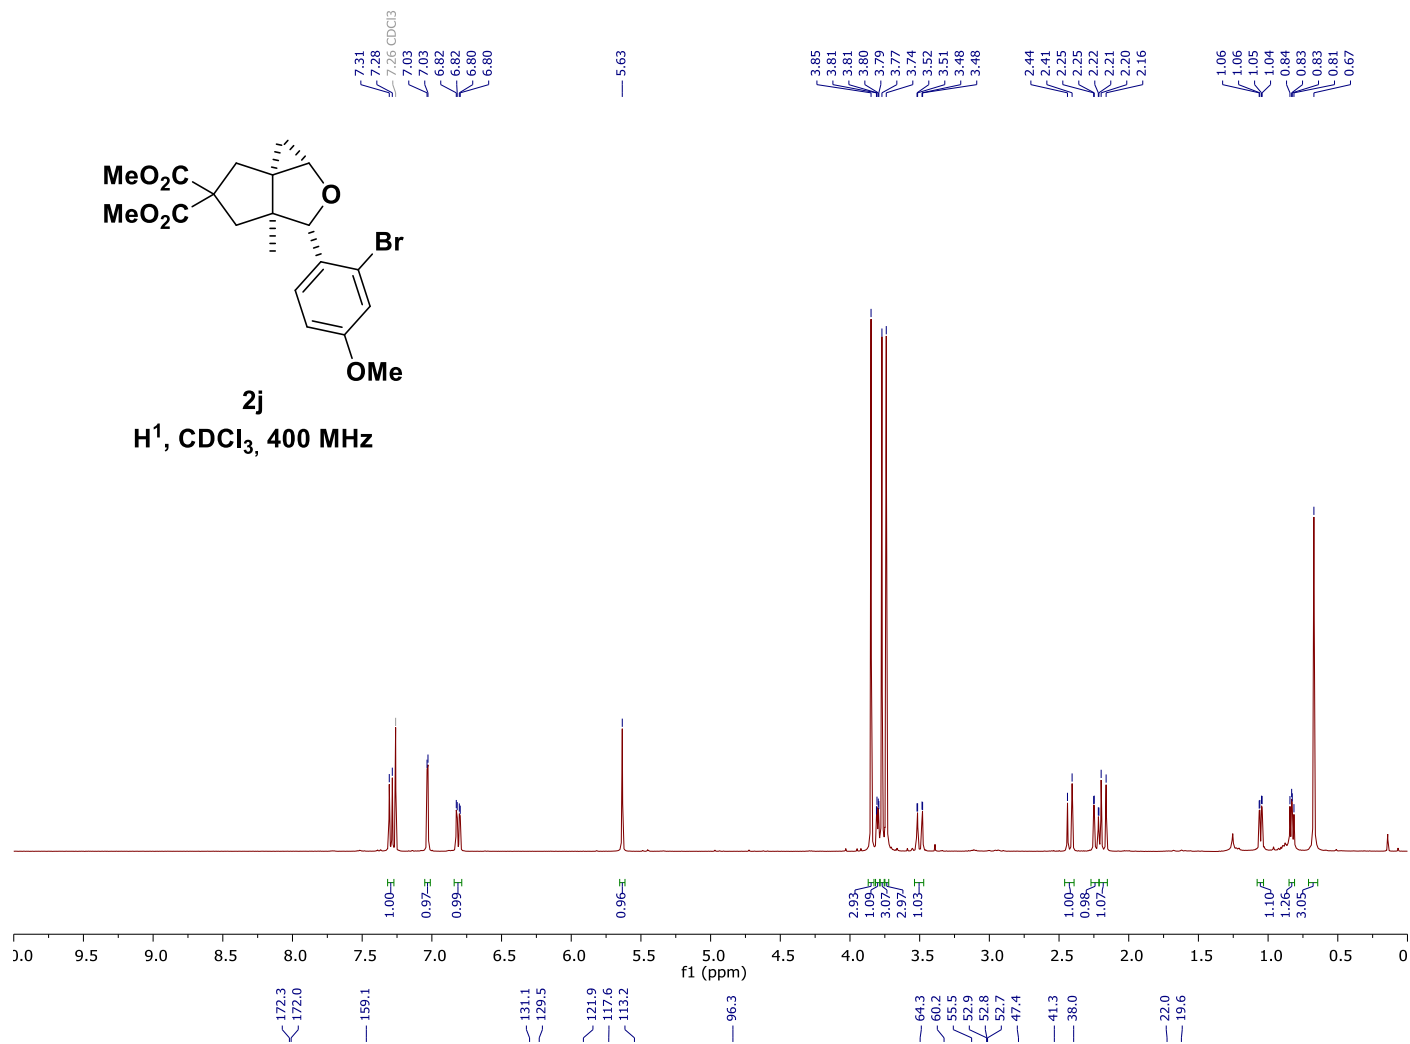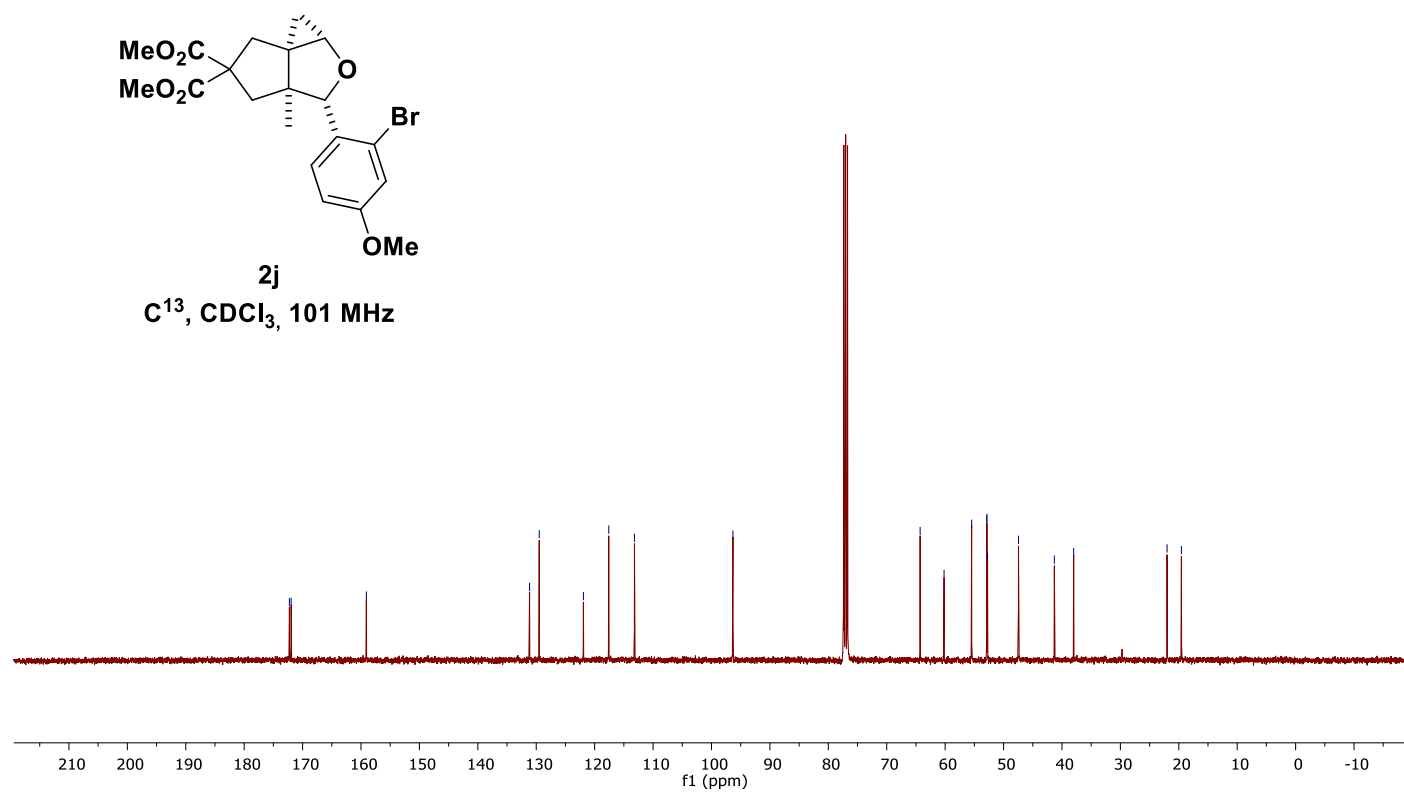



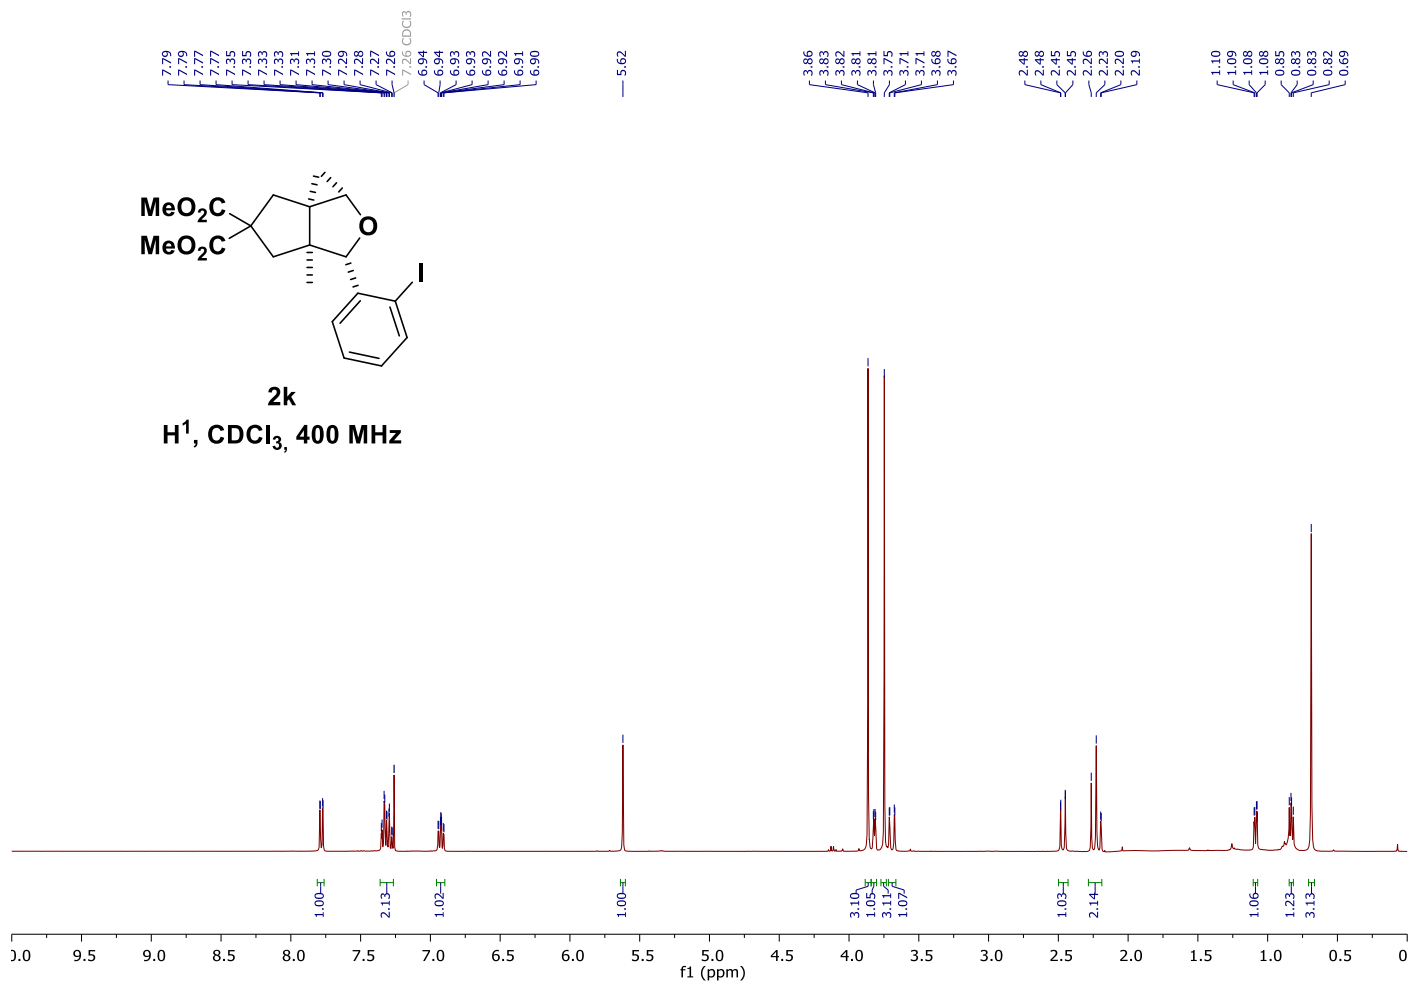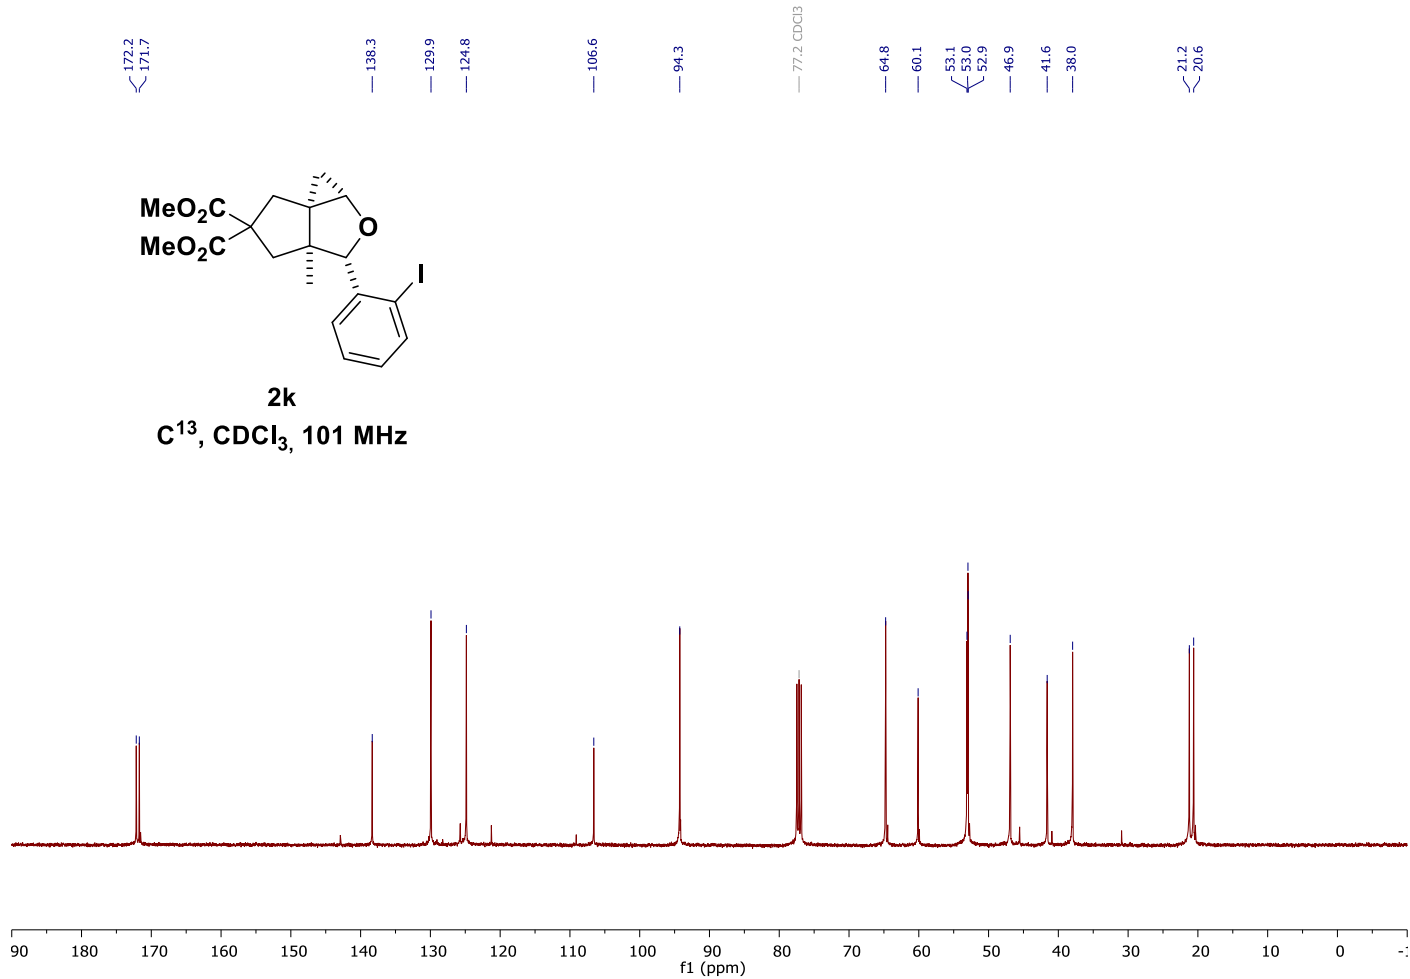

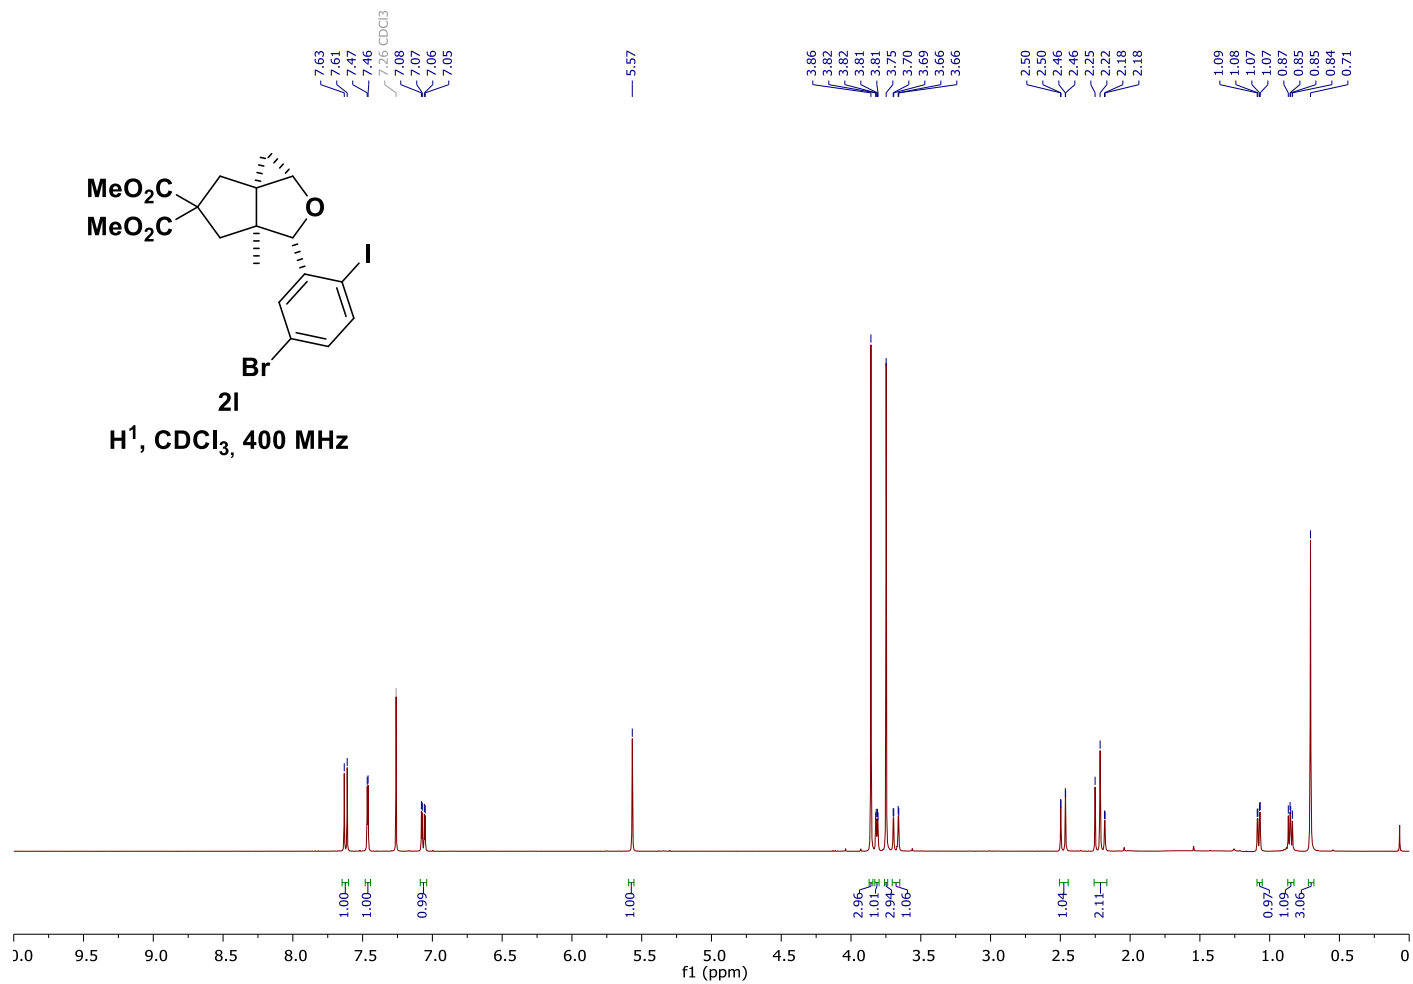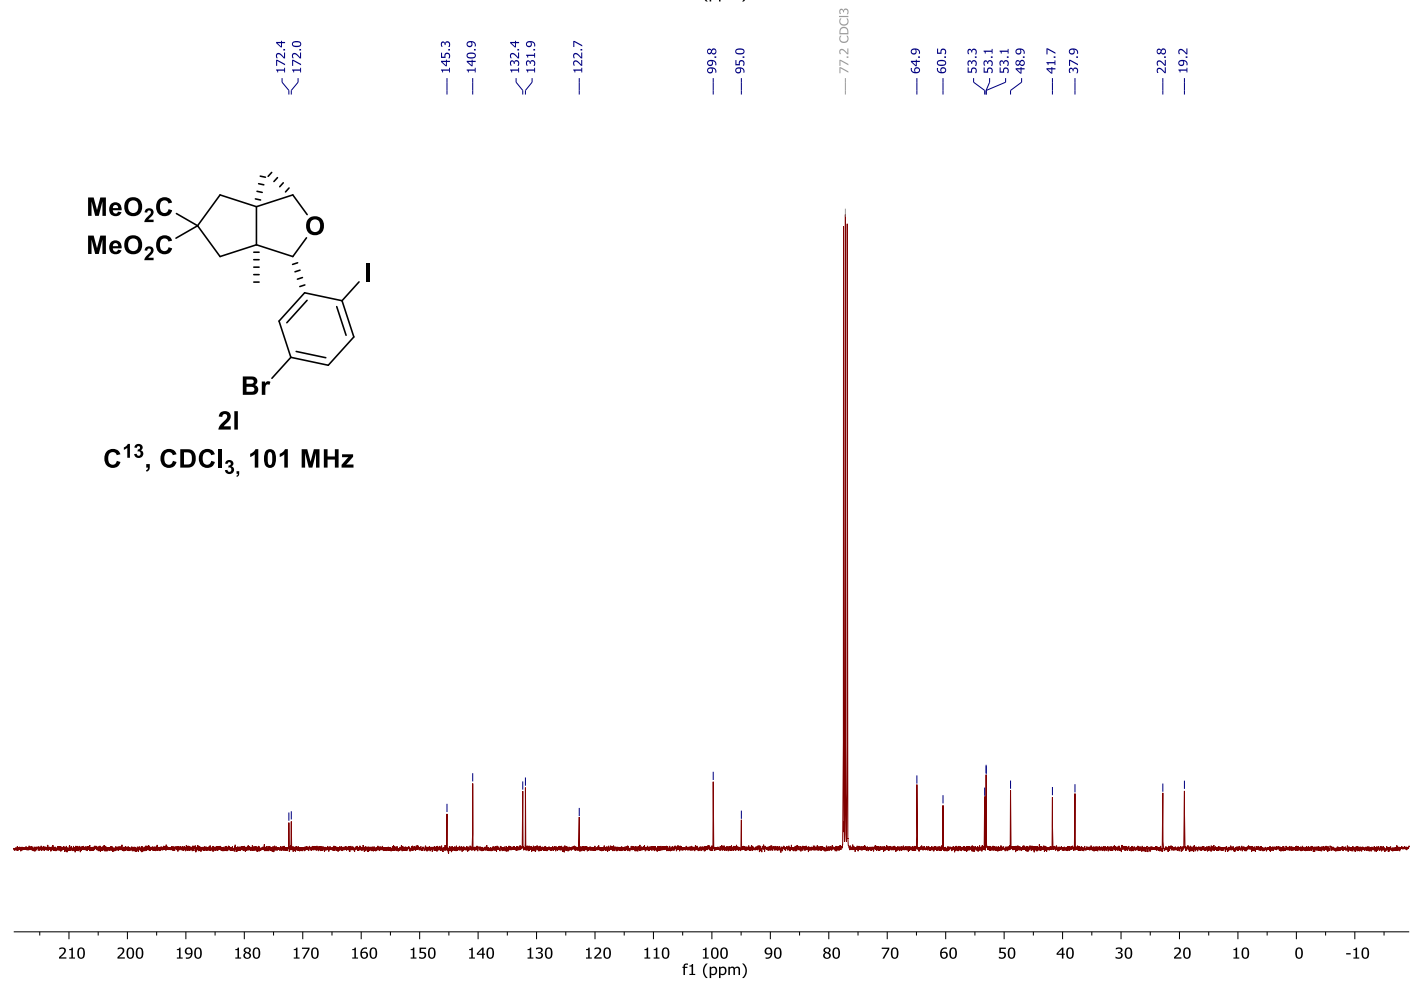

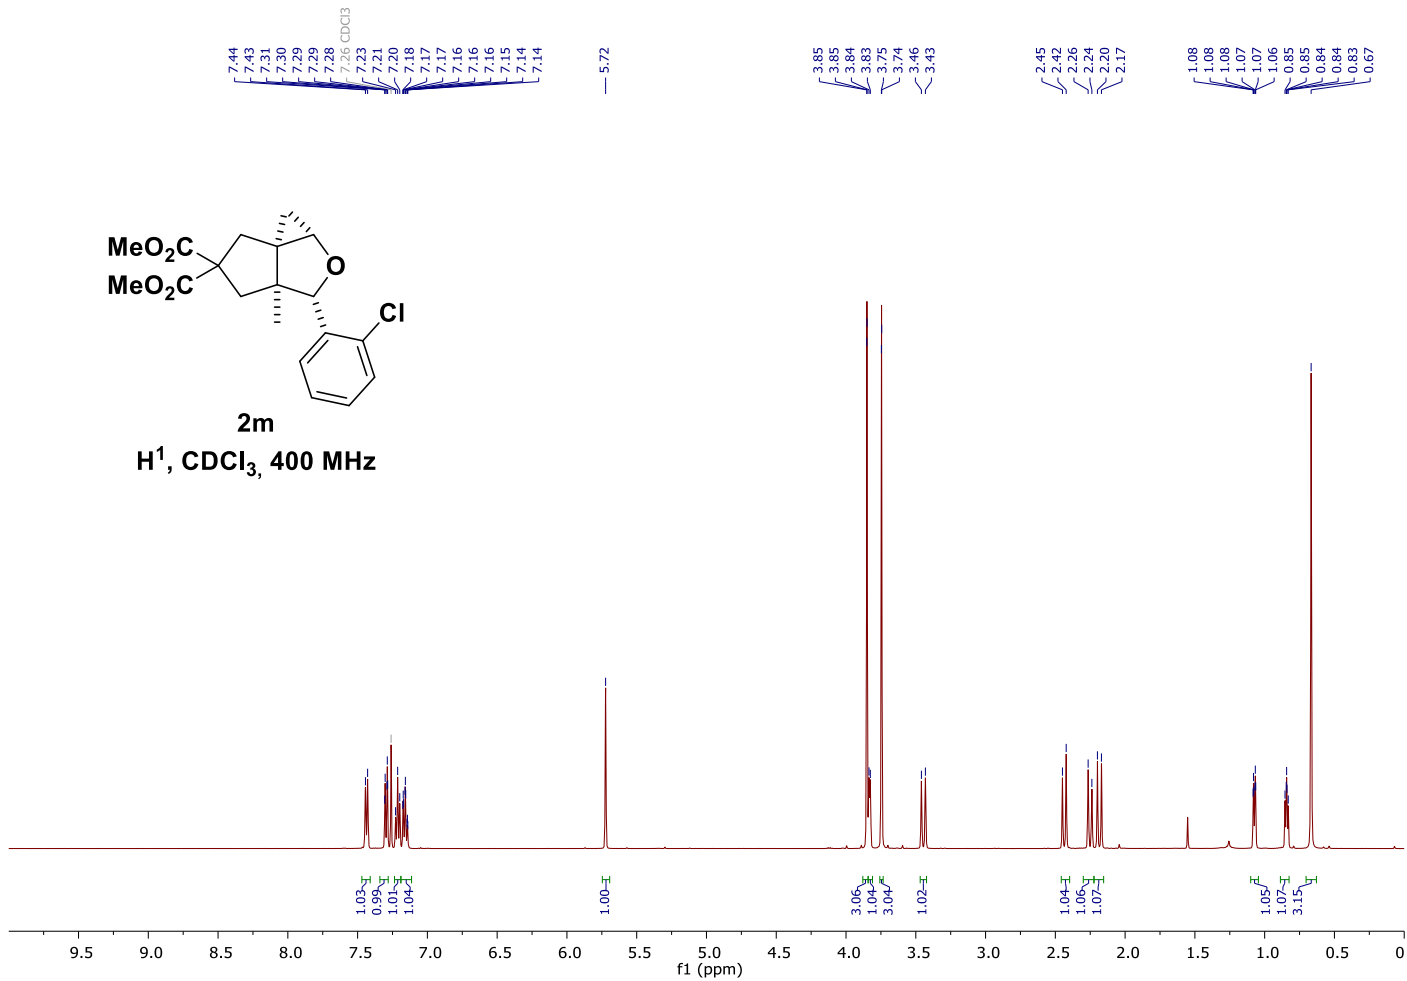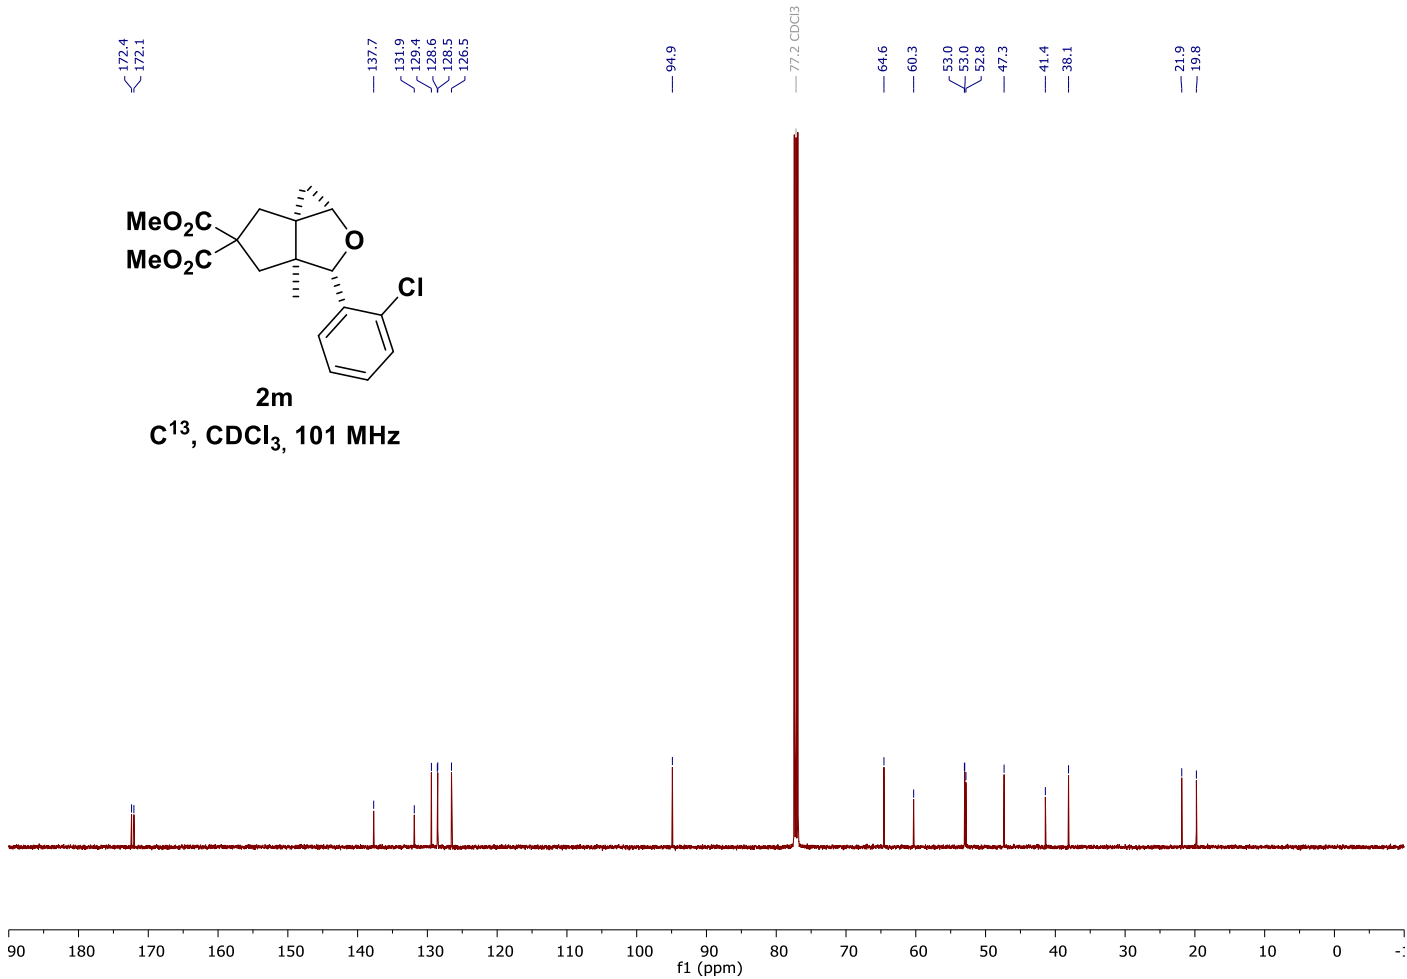

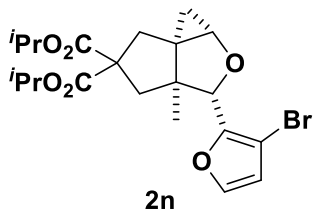

$H^1$ ,  $CDCl_3$ , 400 MHz

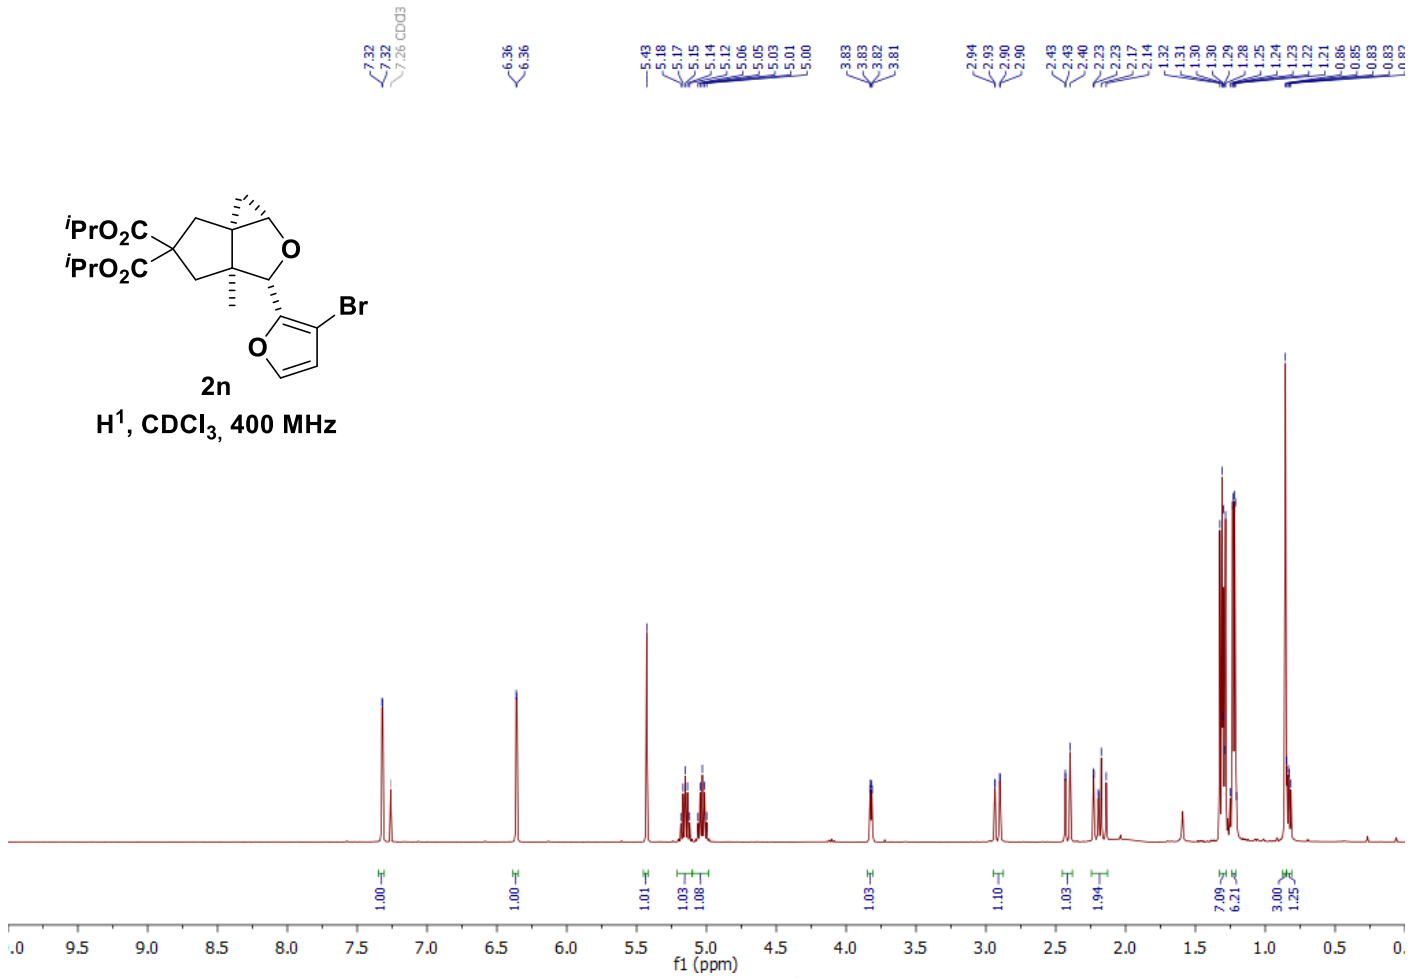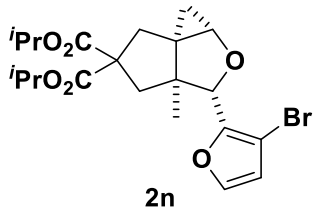

$C^{13}$ ,  $CDCl_3$ , 101 MHz

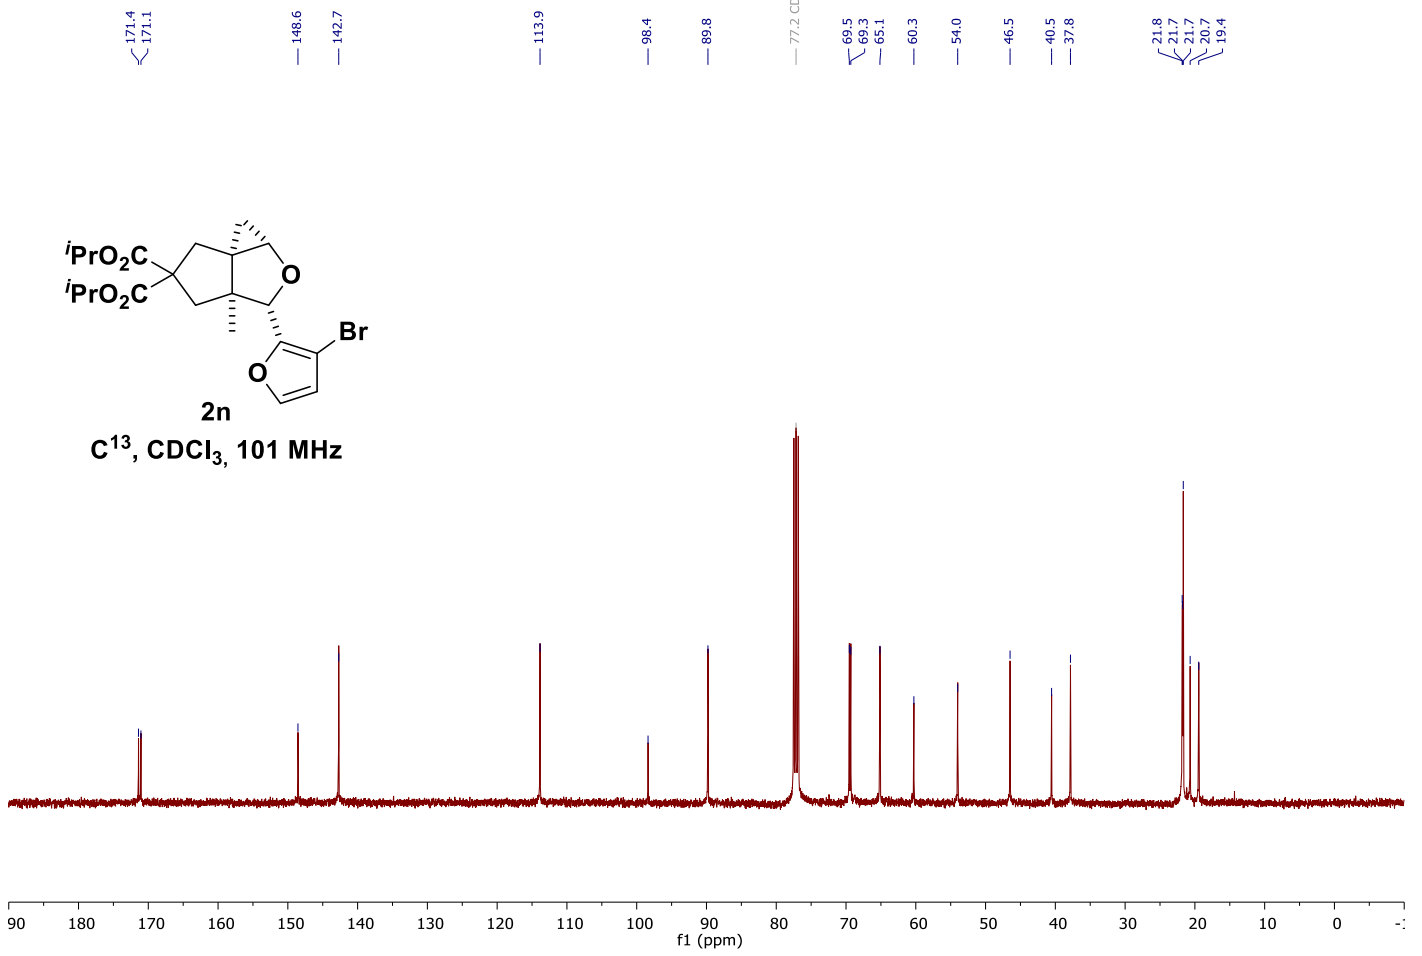

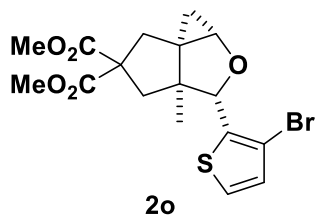

$H^1$ ,  $CDCl_3$ , 400 MHz

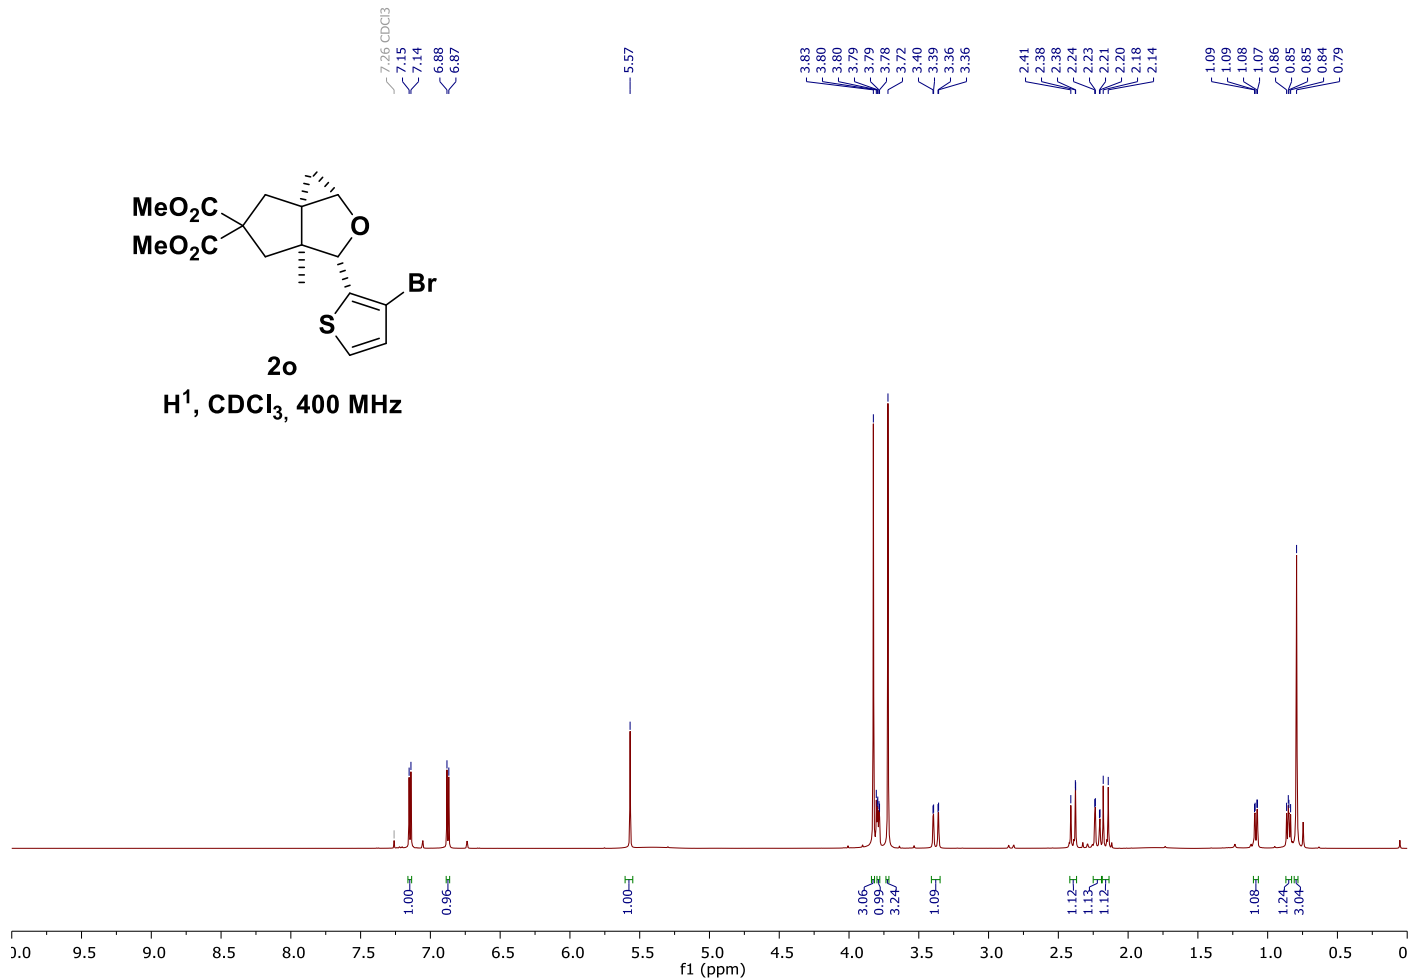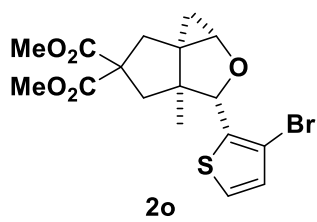

$C^{13}$ ,  $CDCl_3$ , 101 MHz

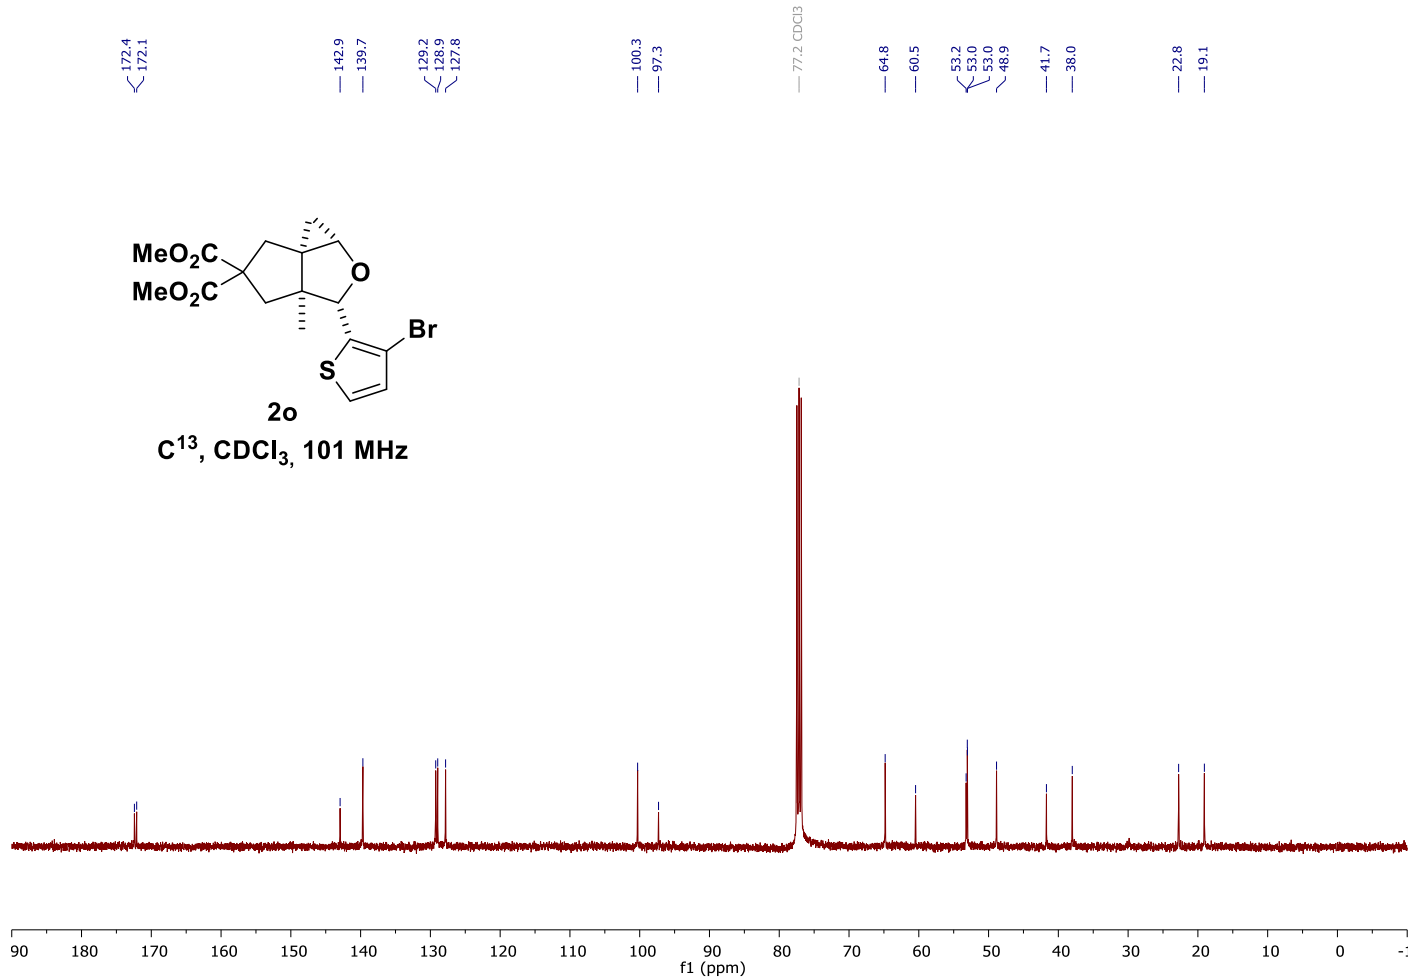

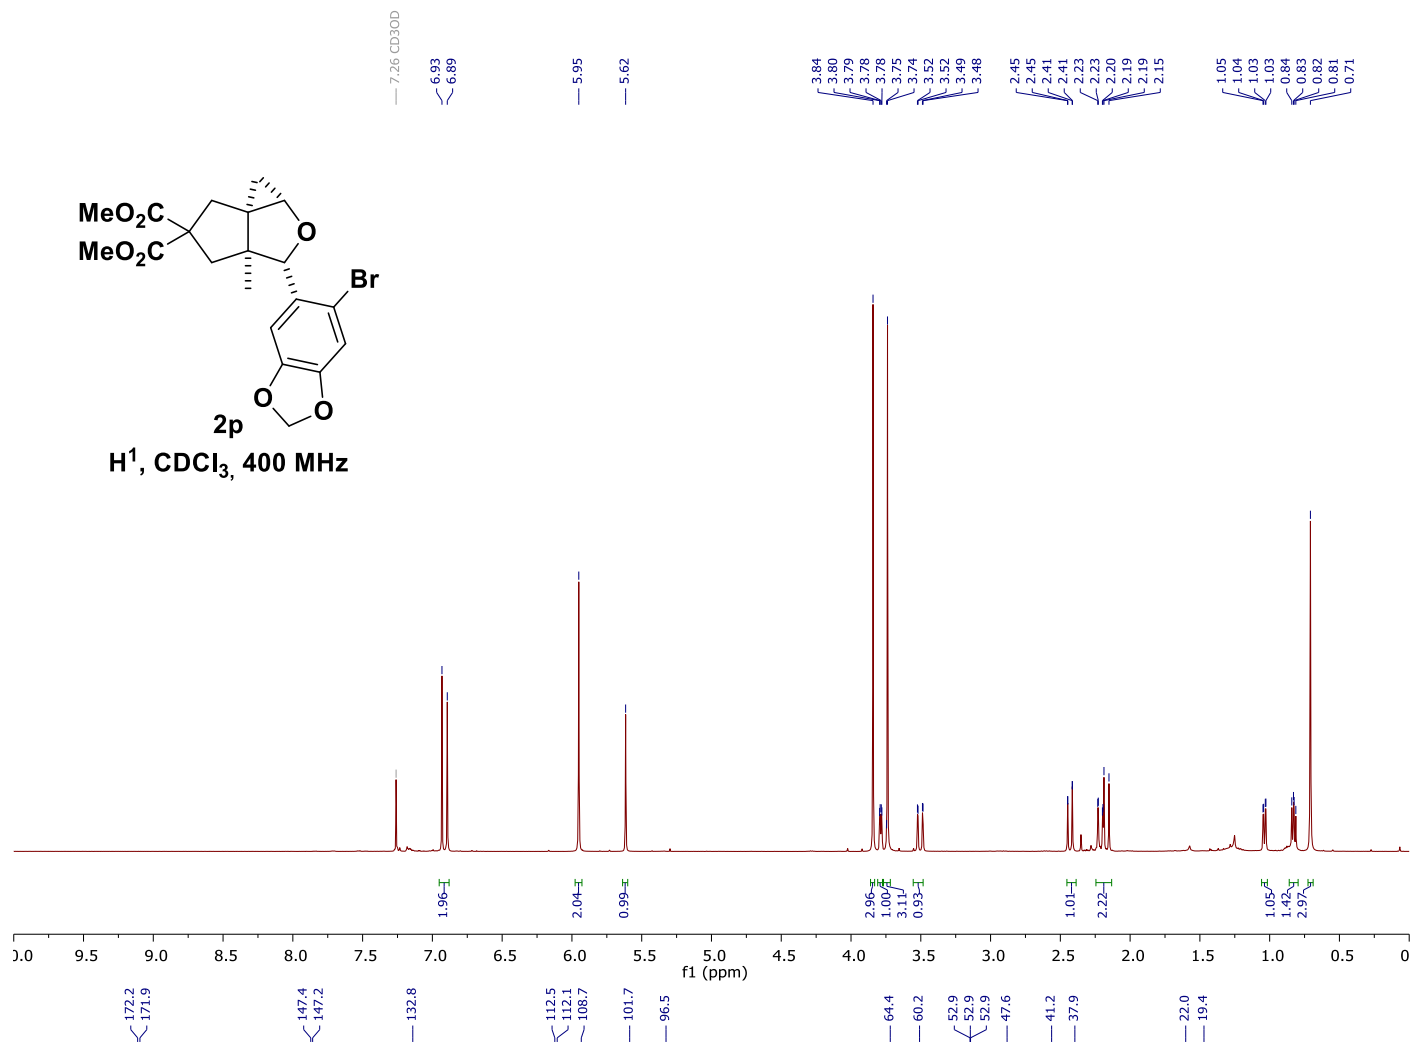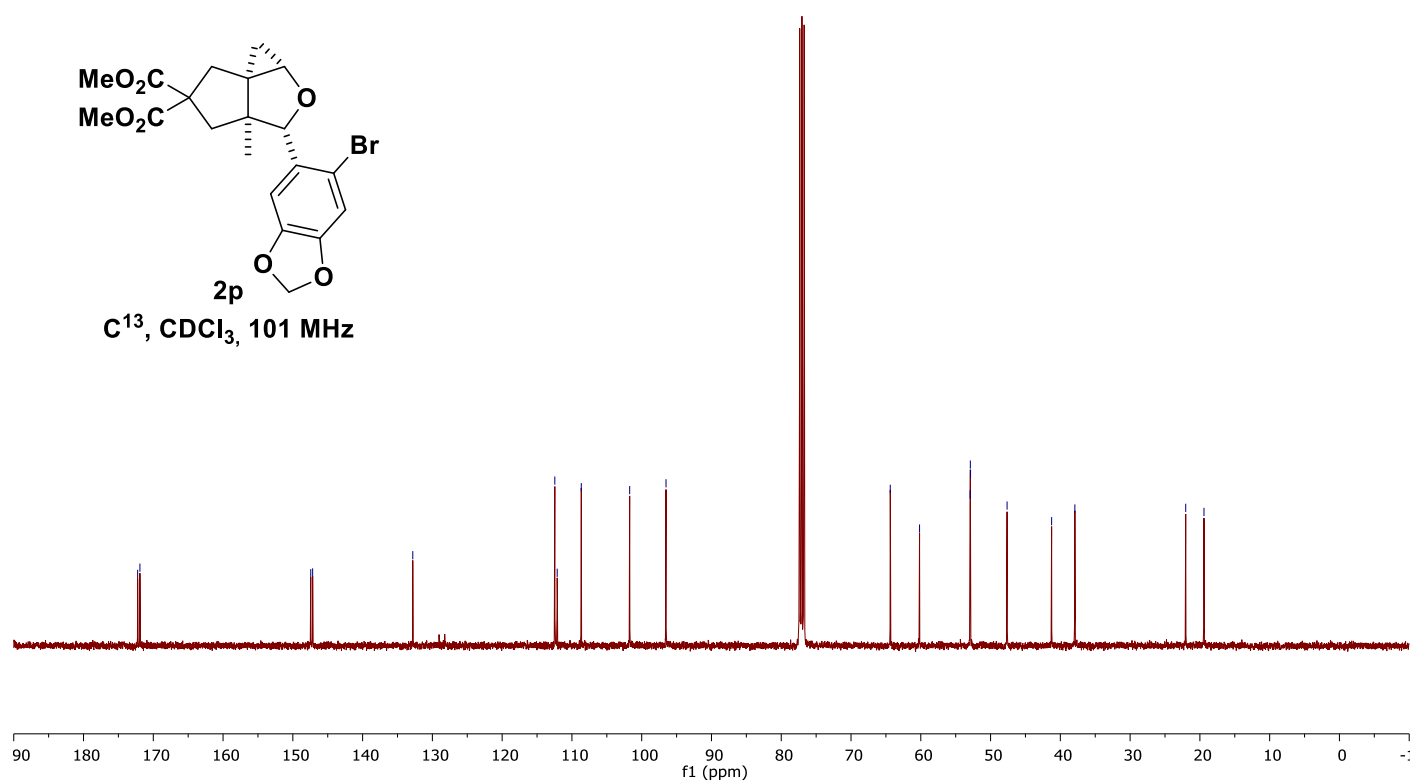

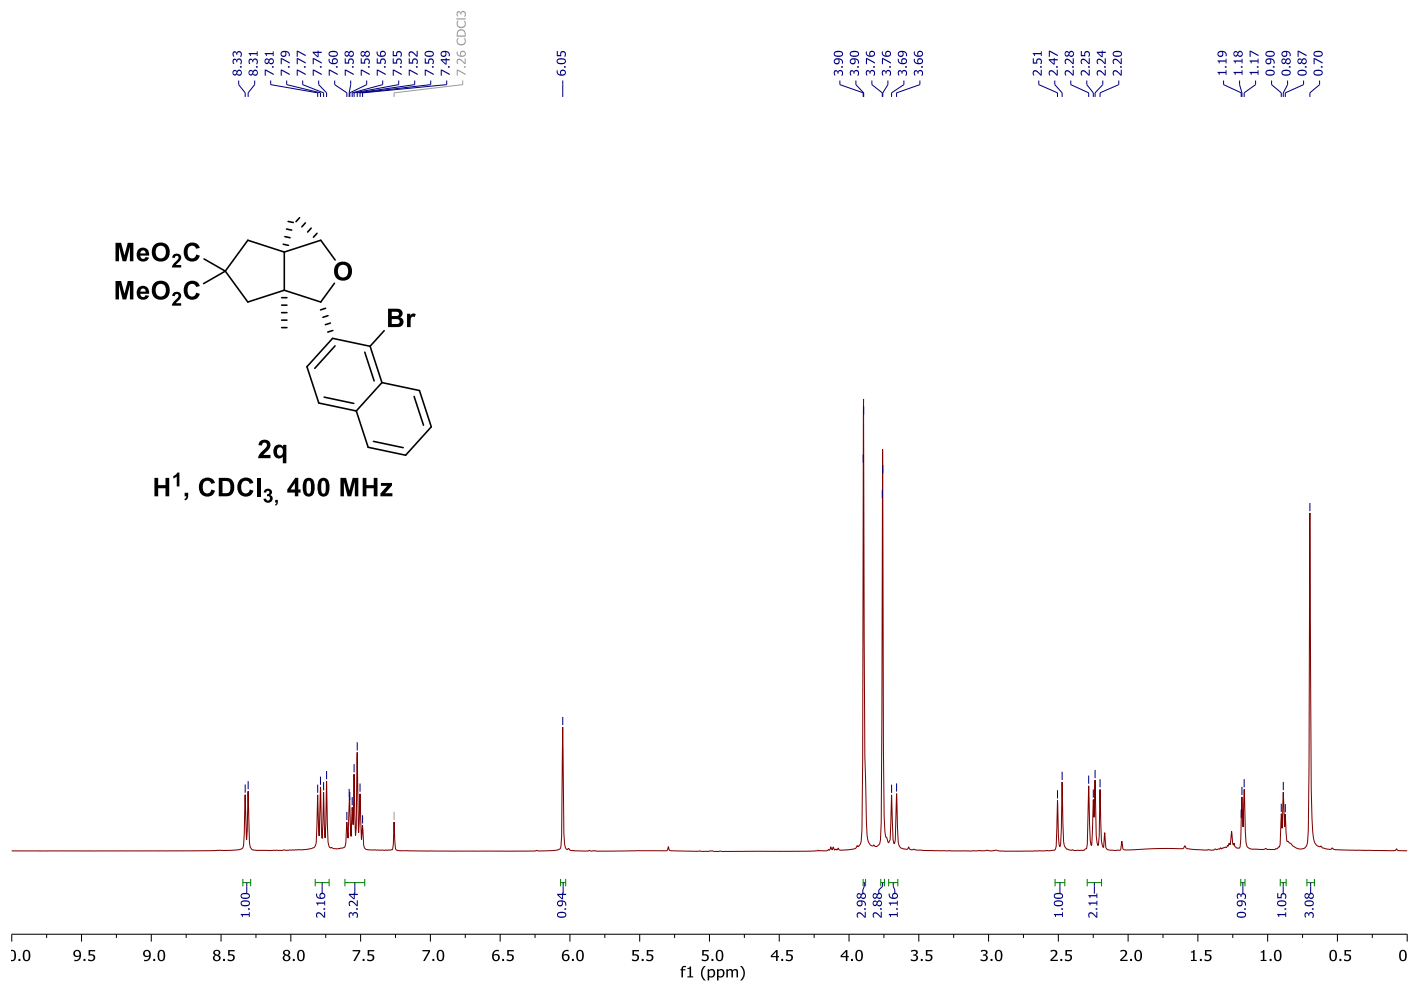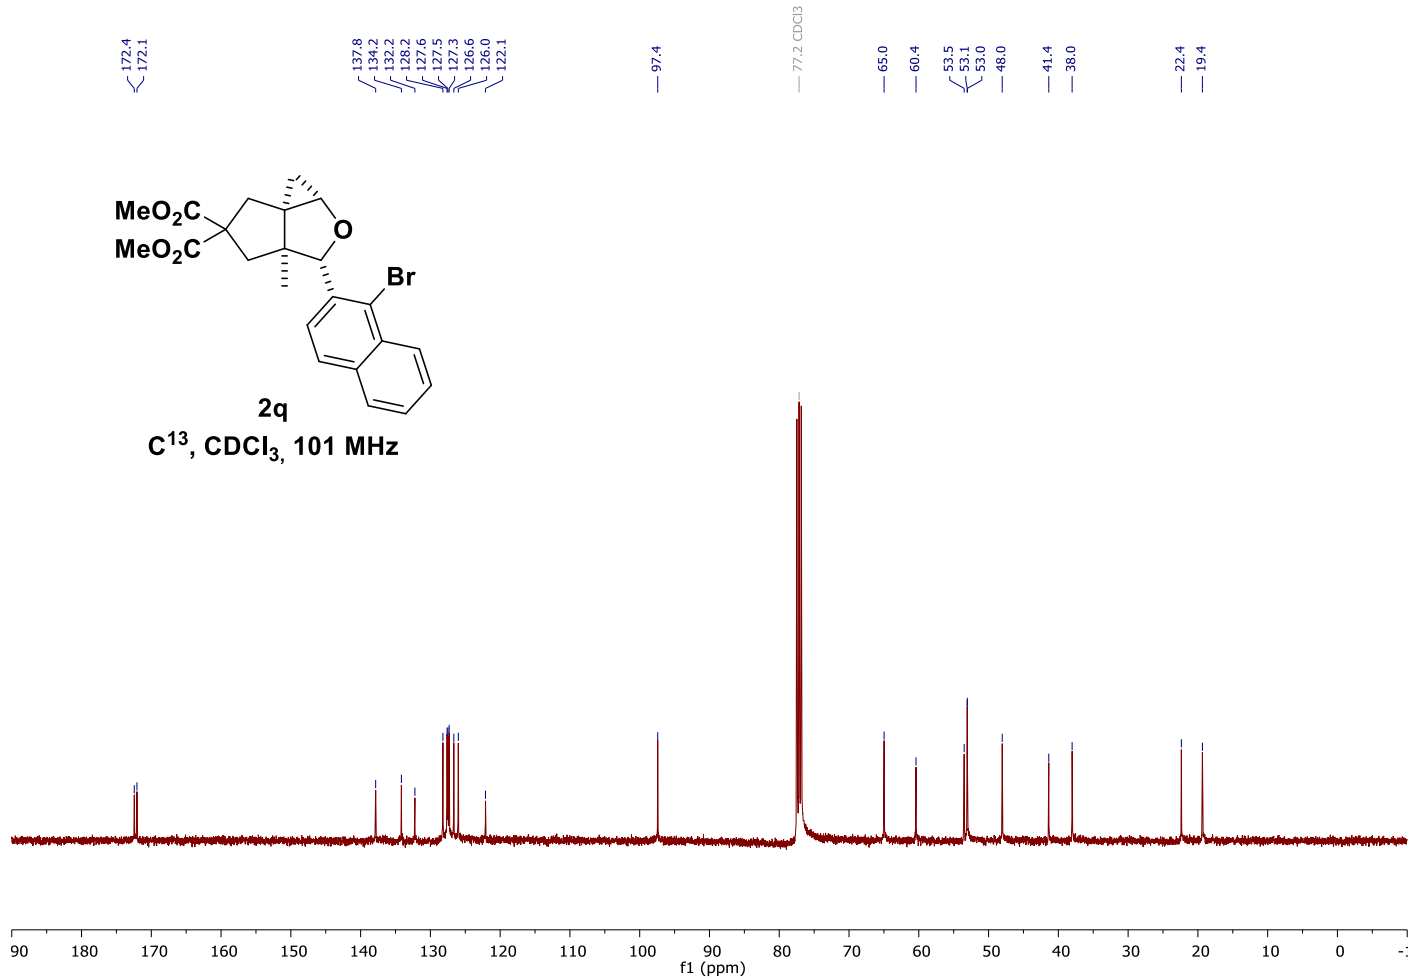

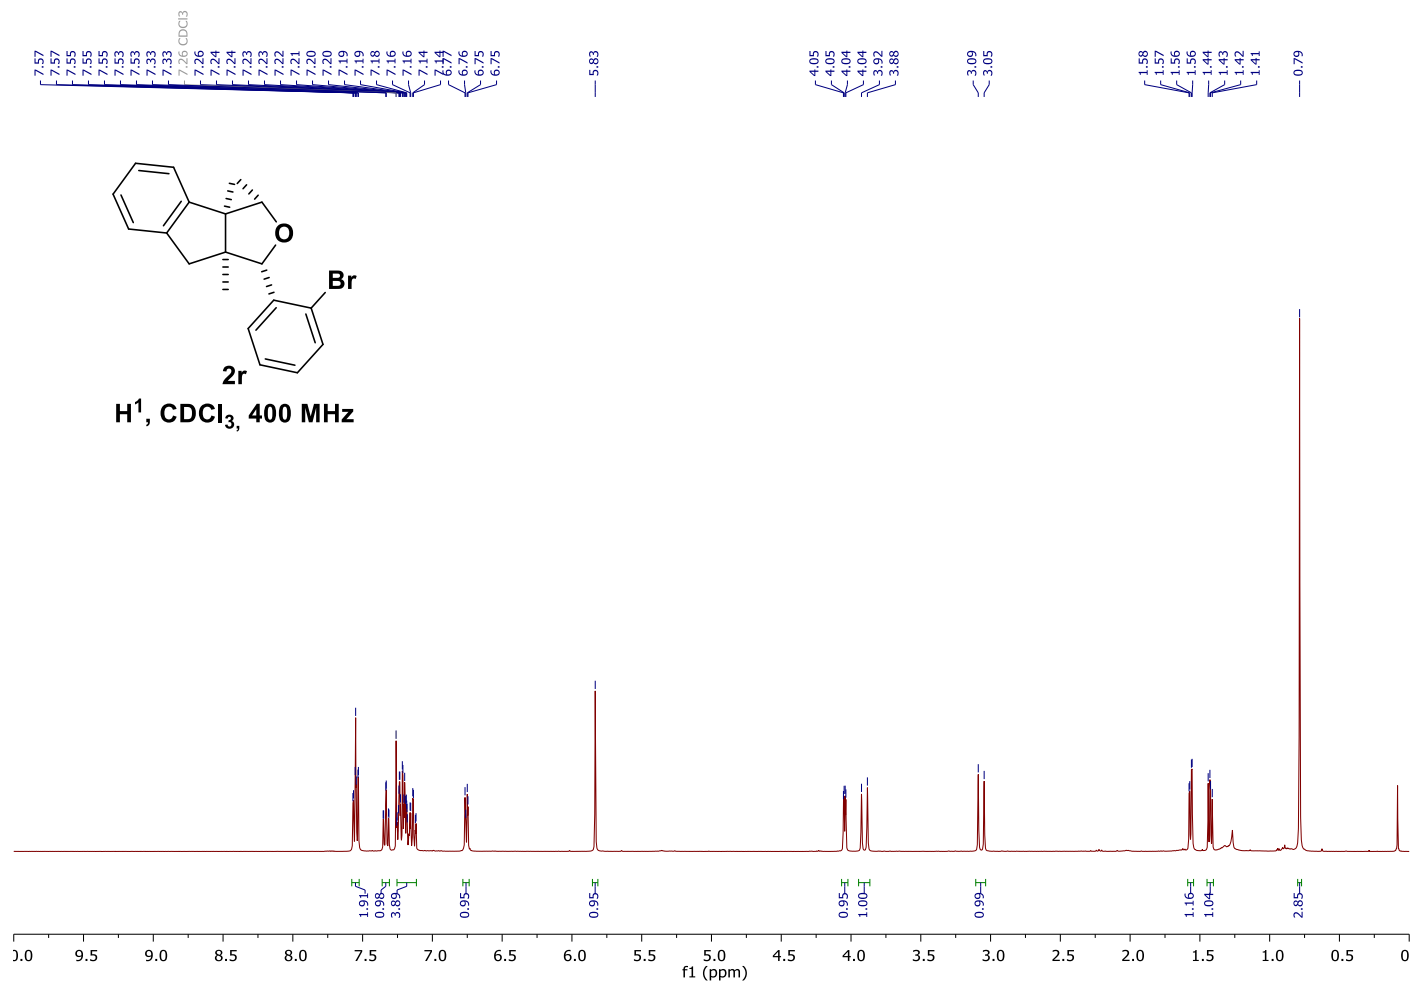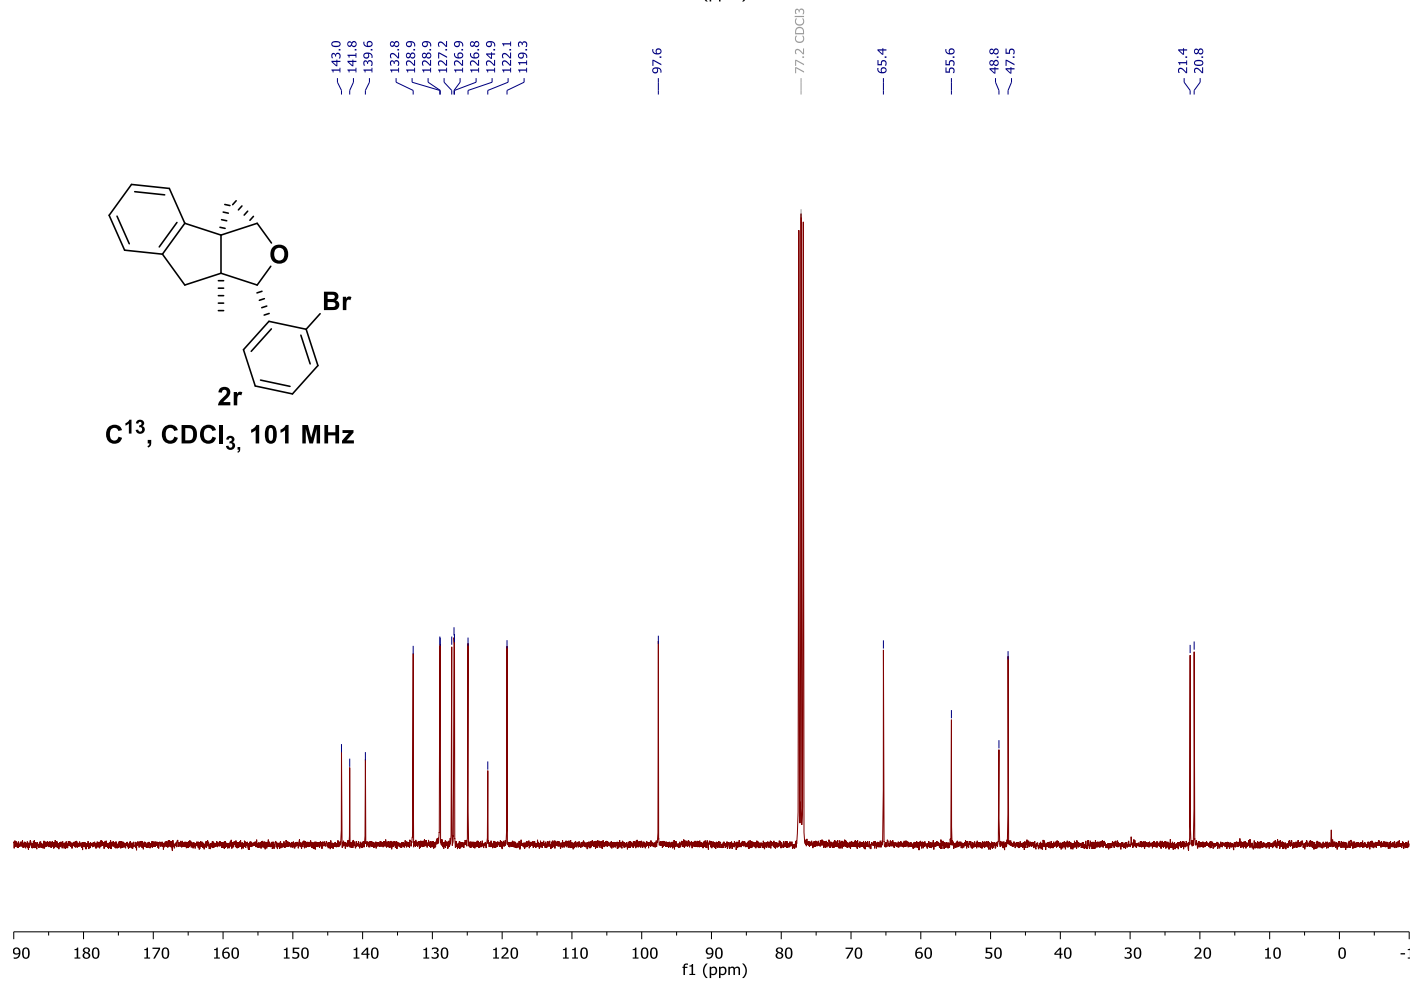



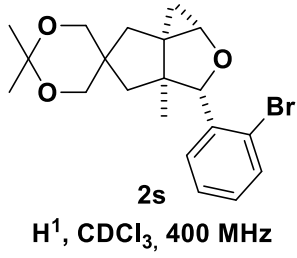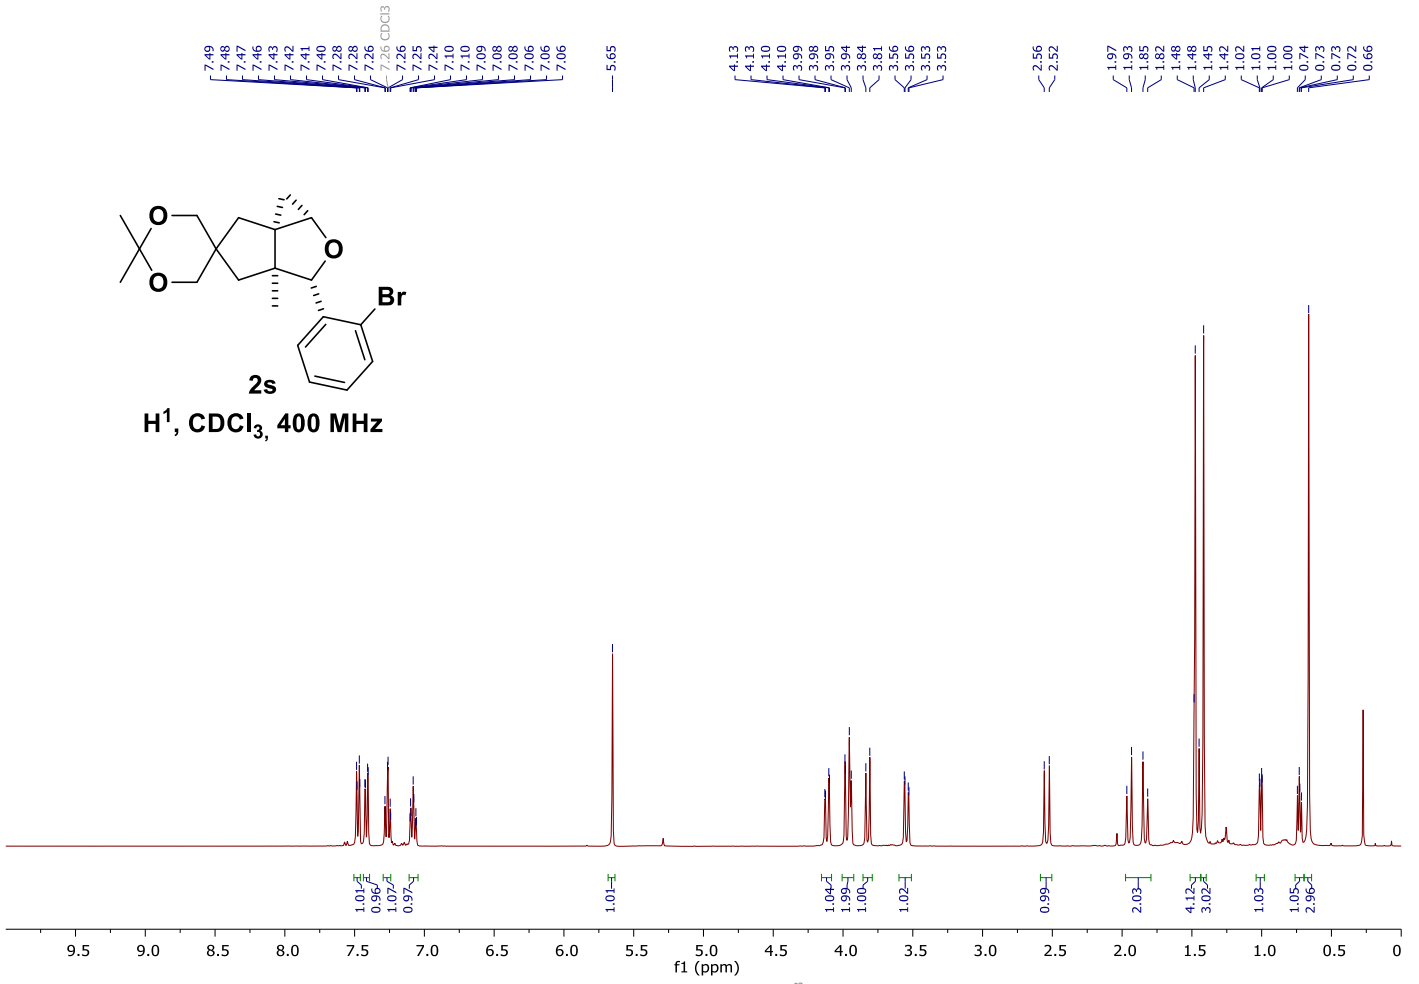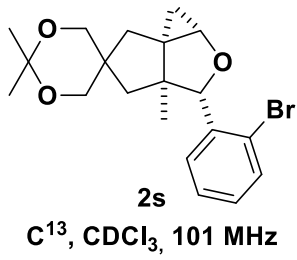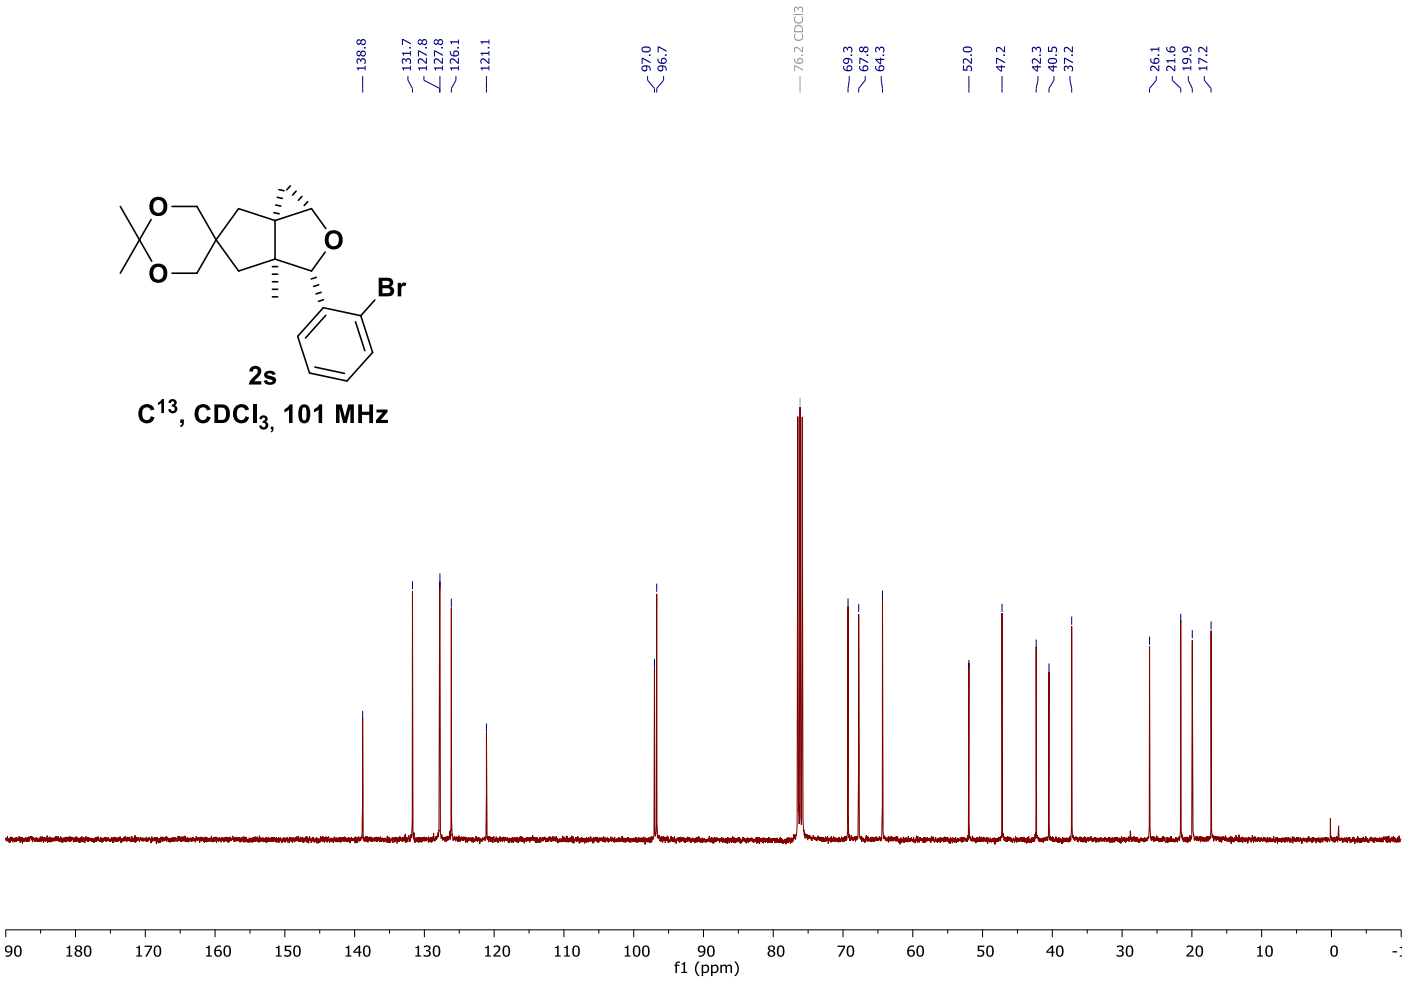

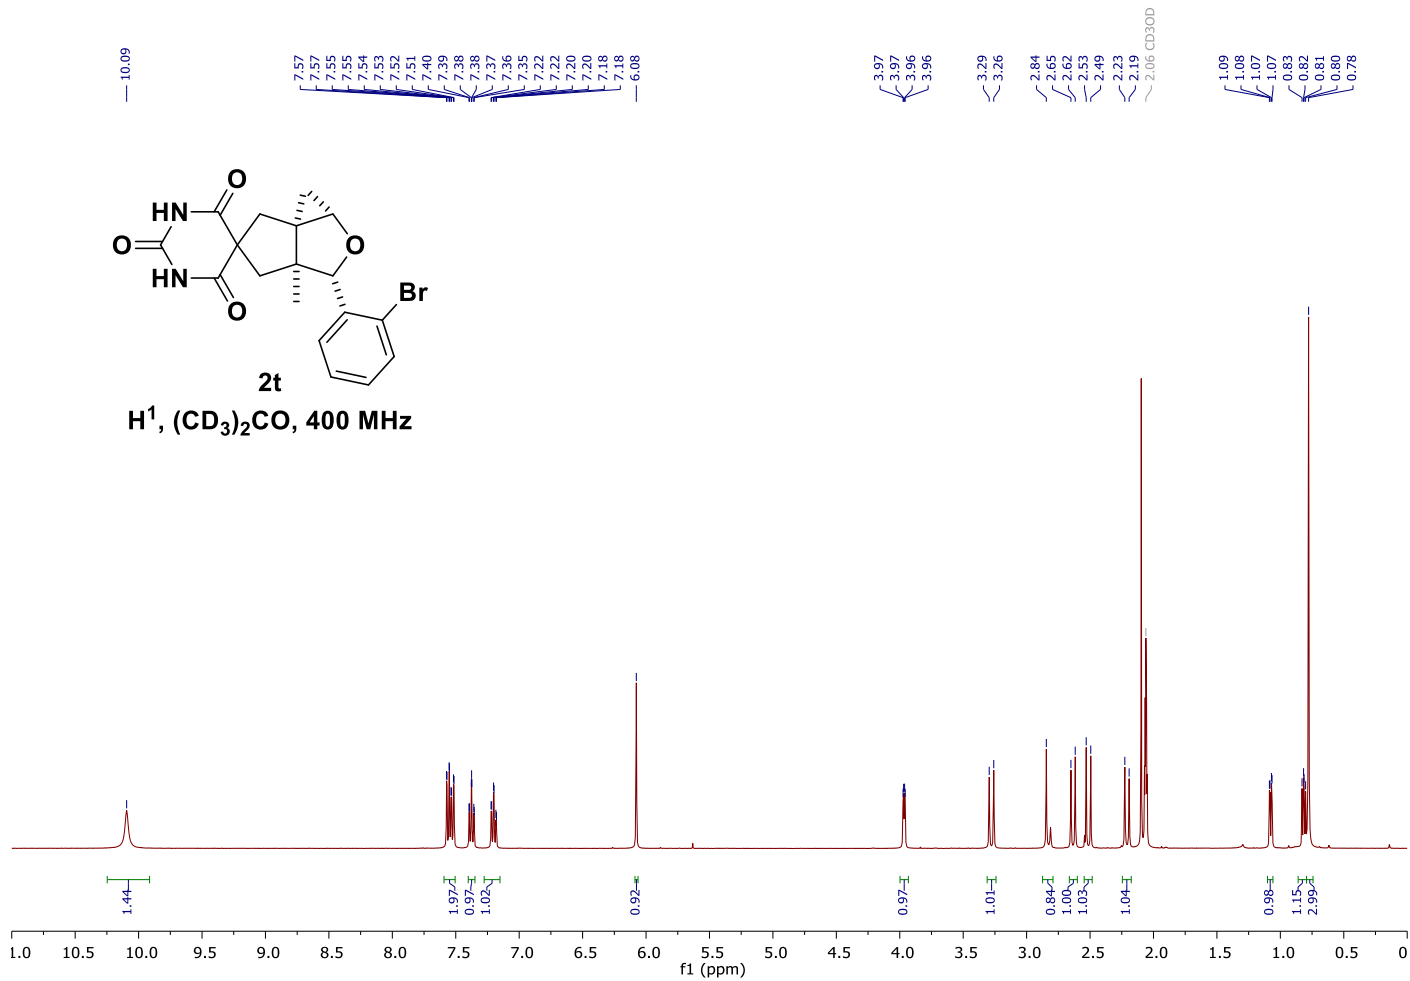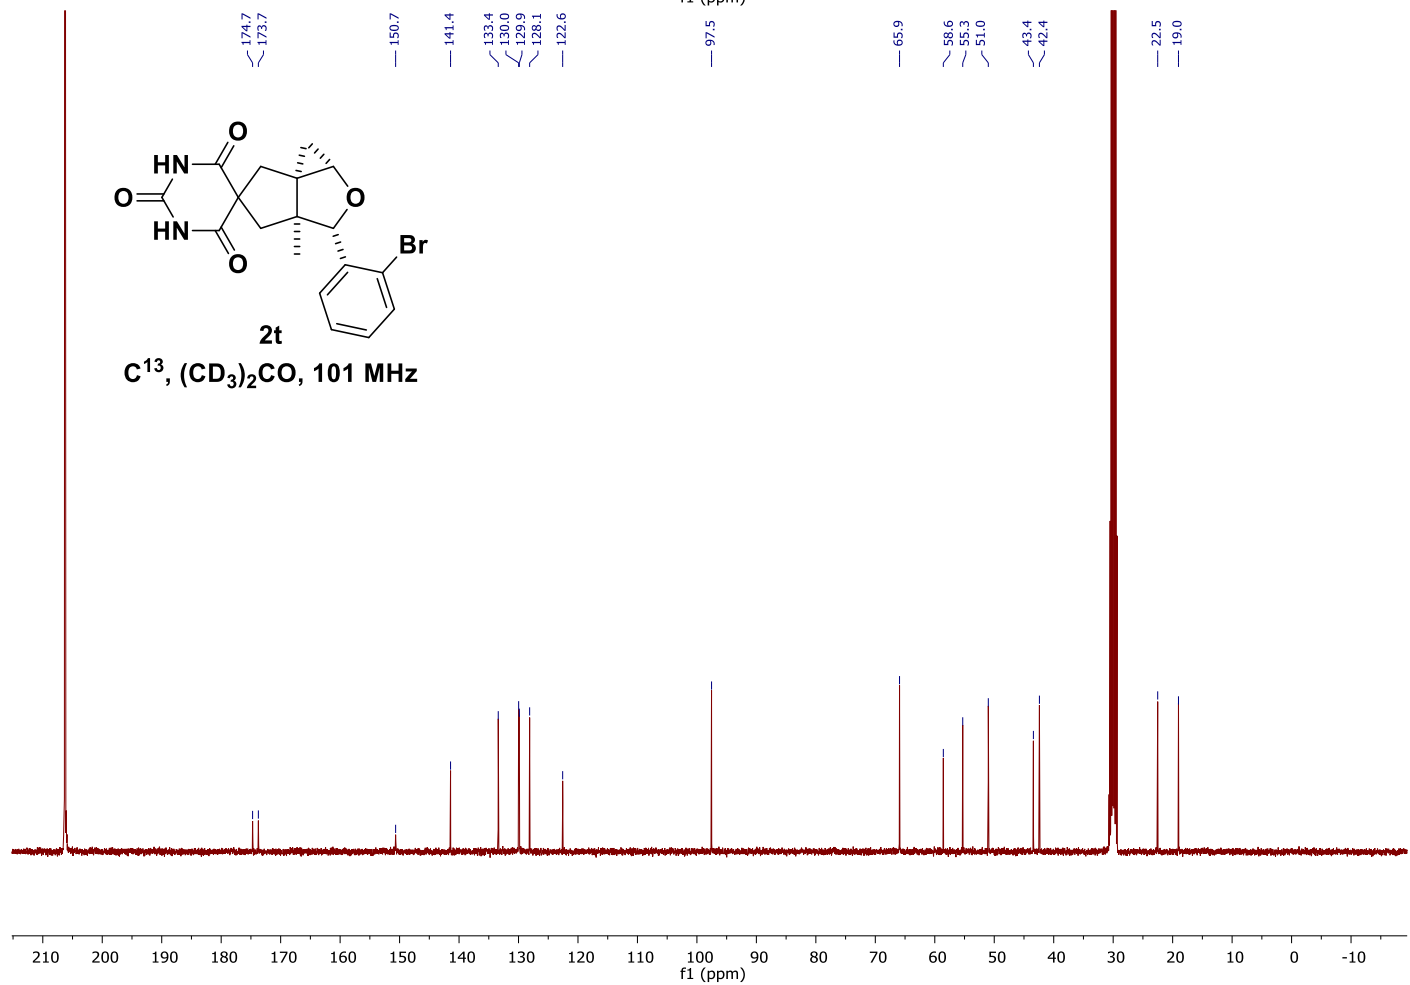

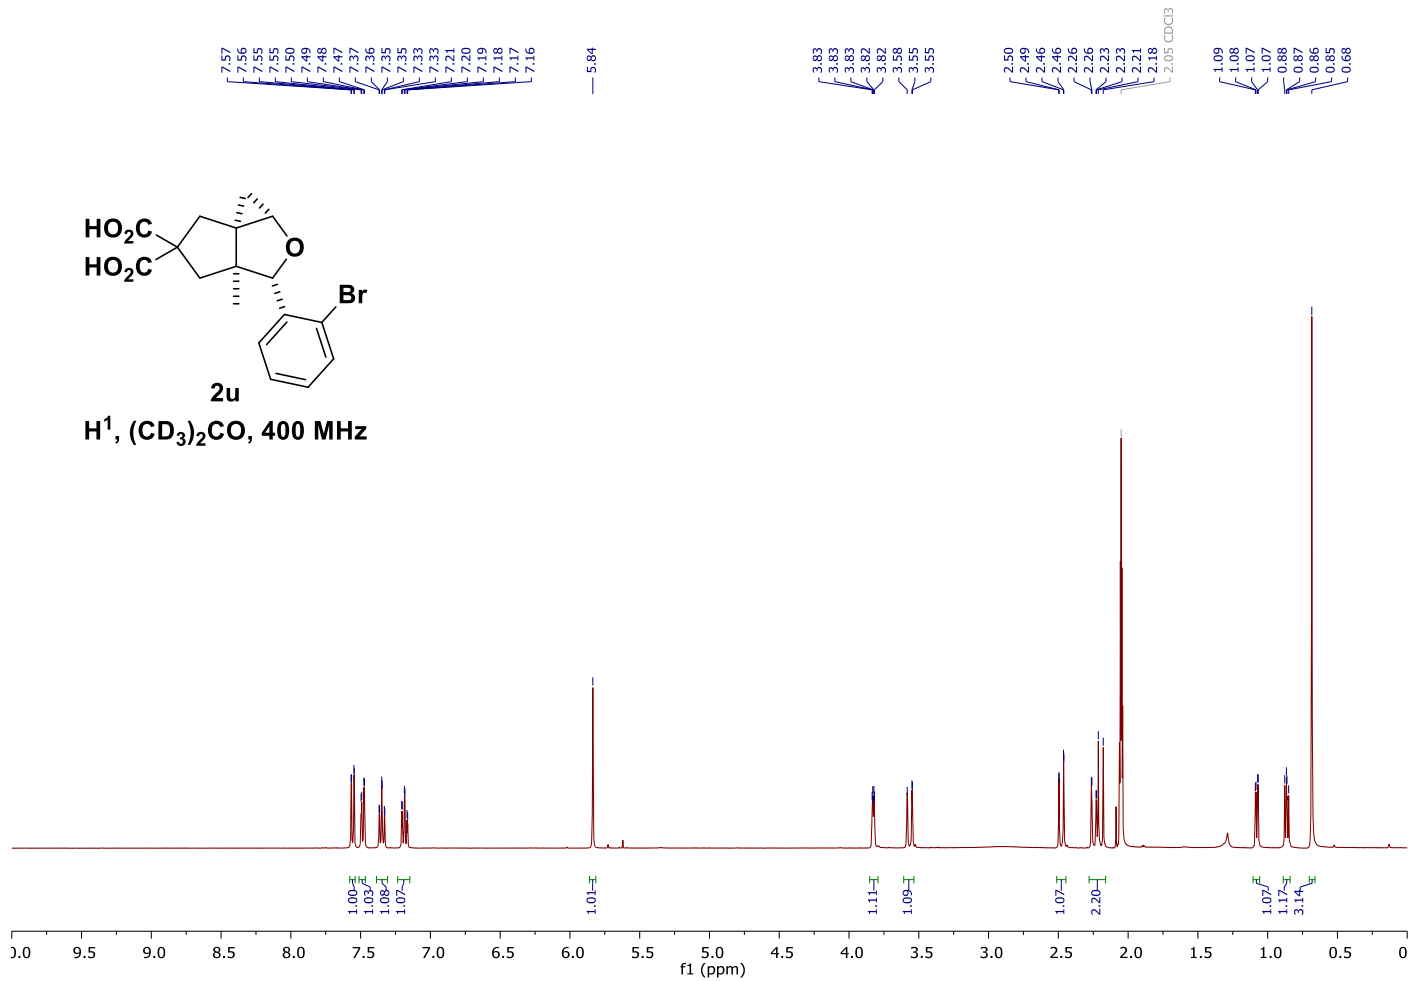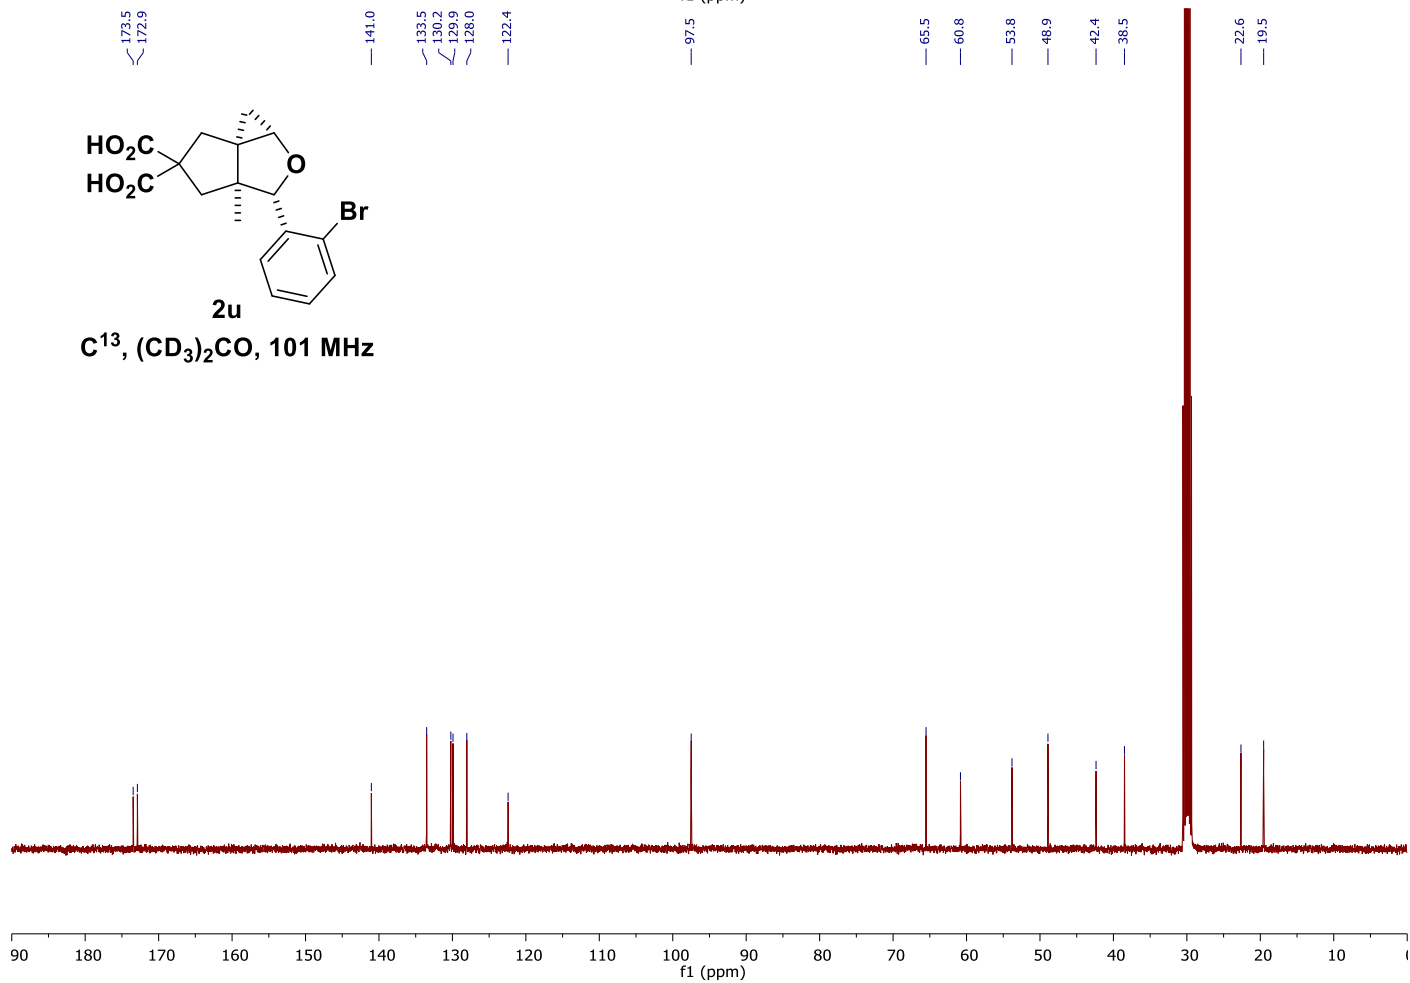

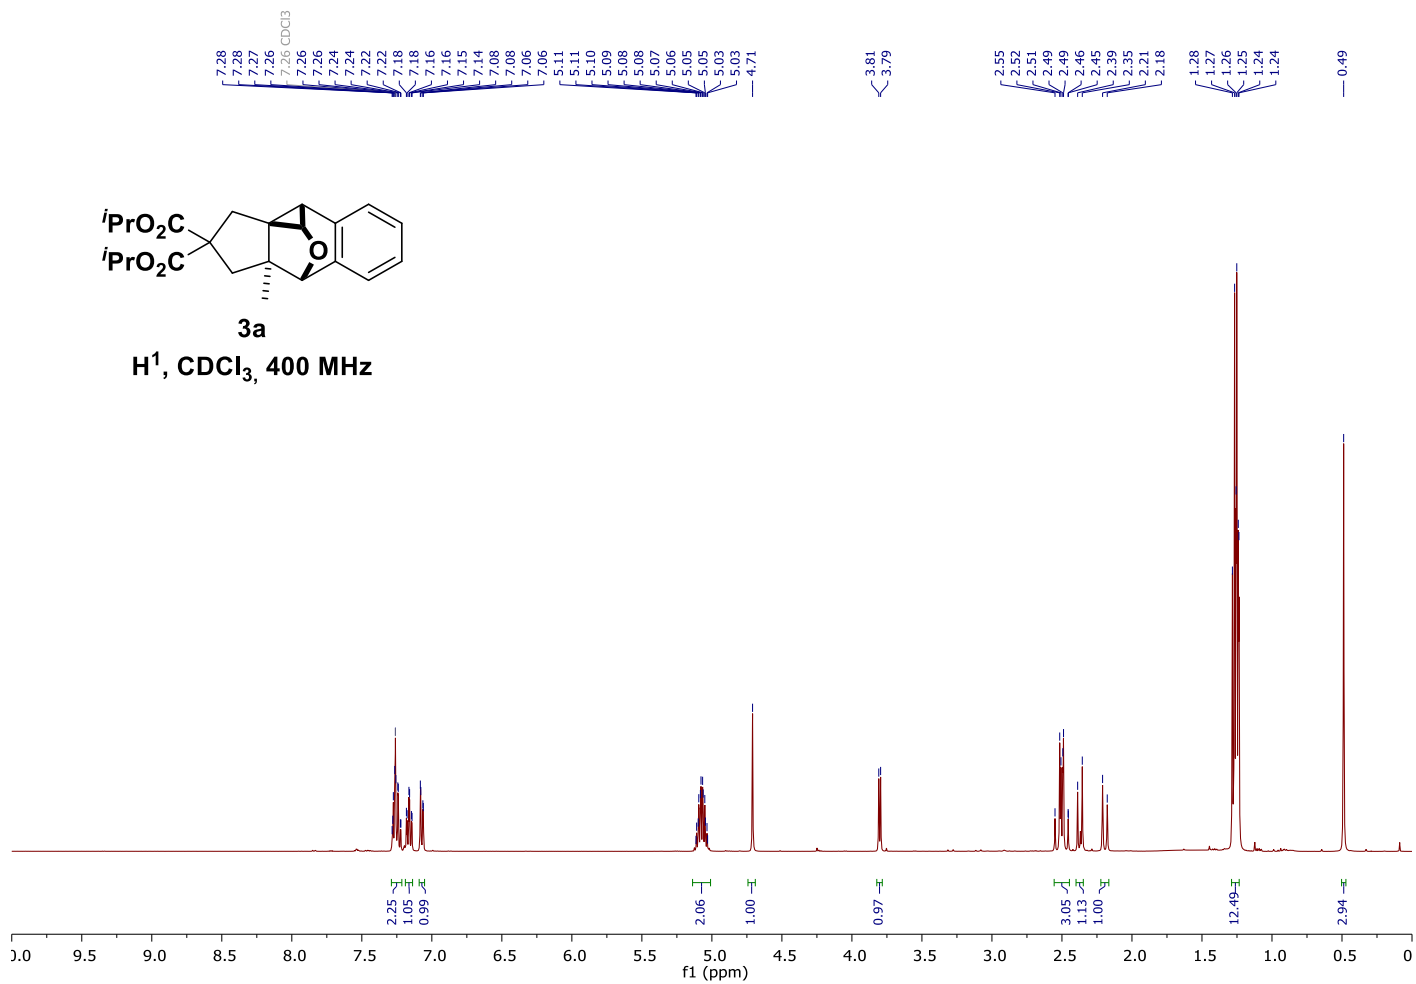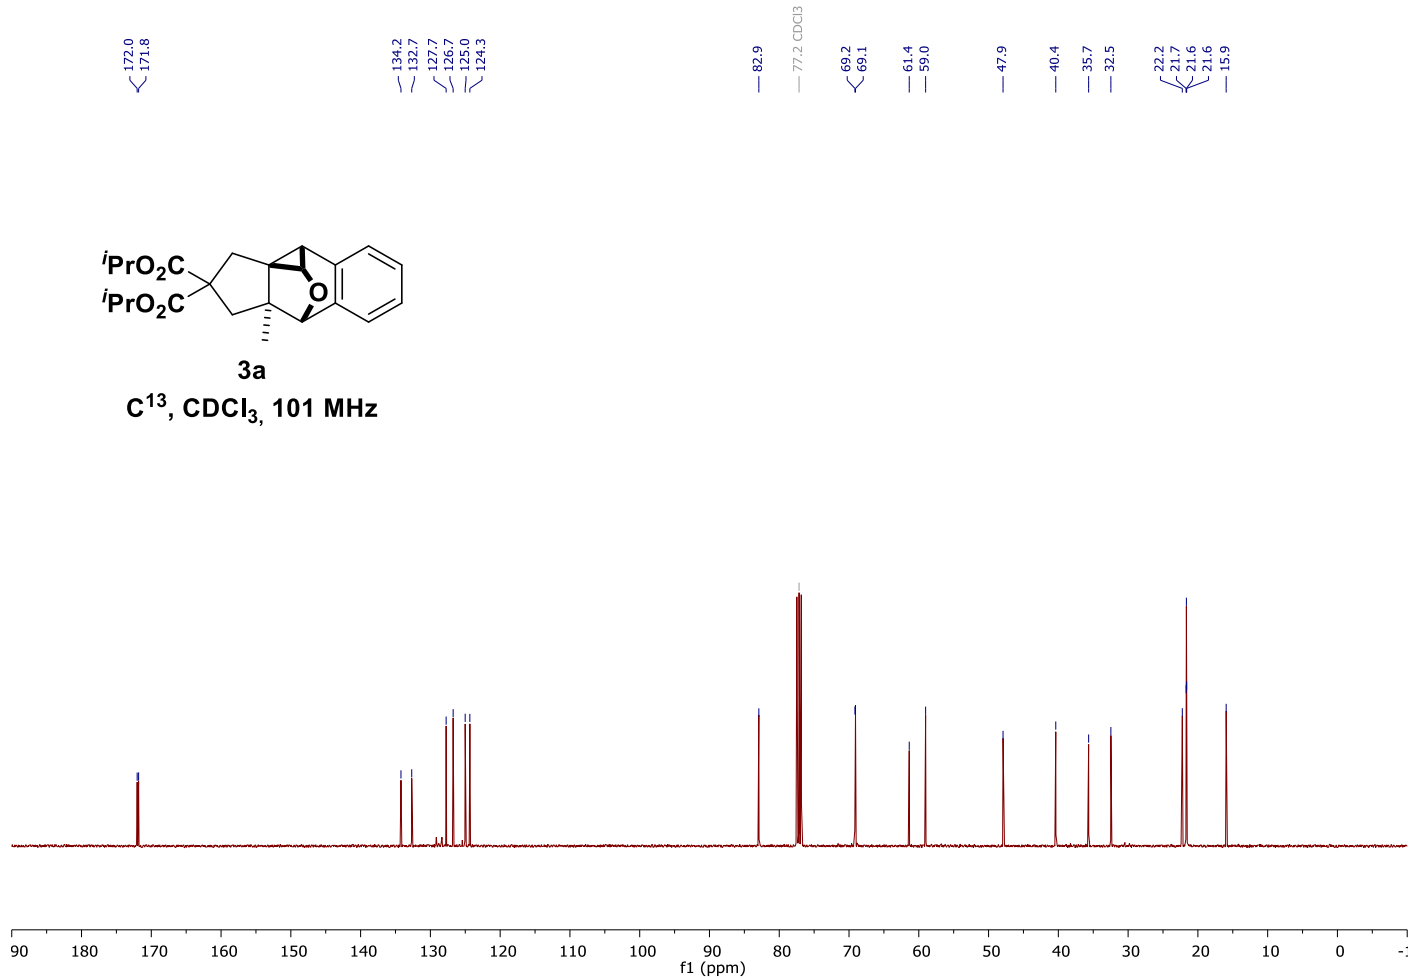

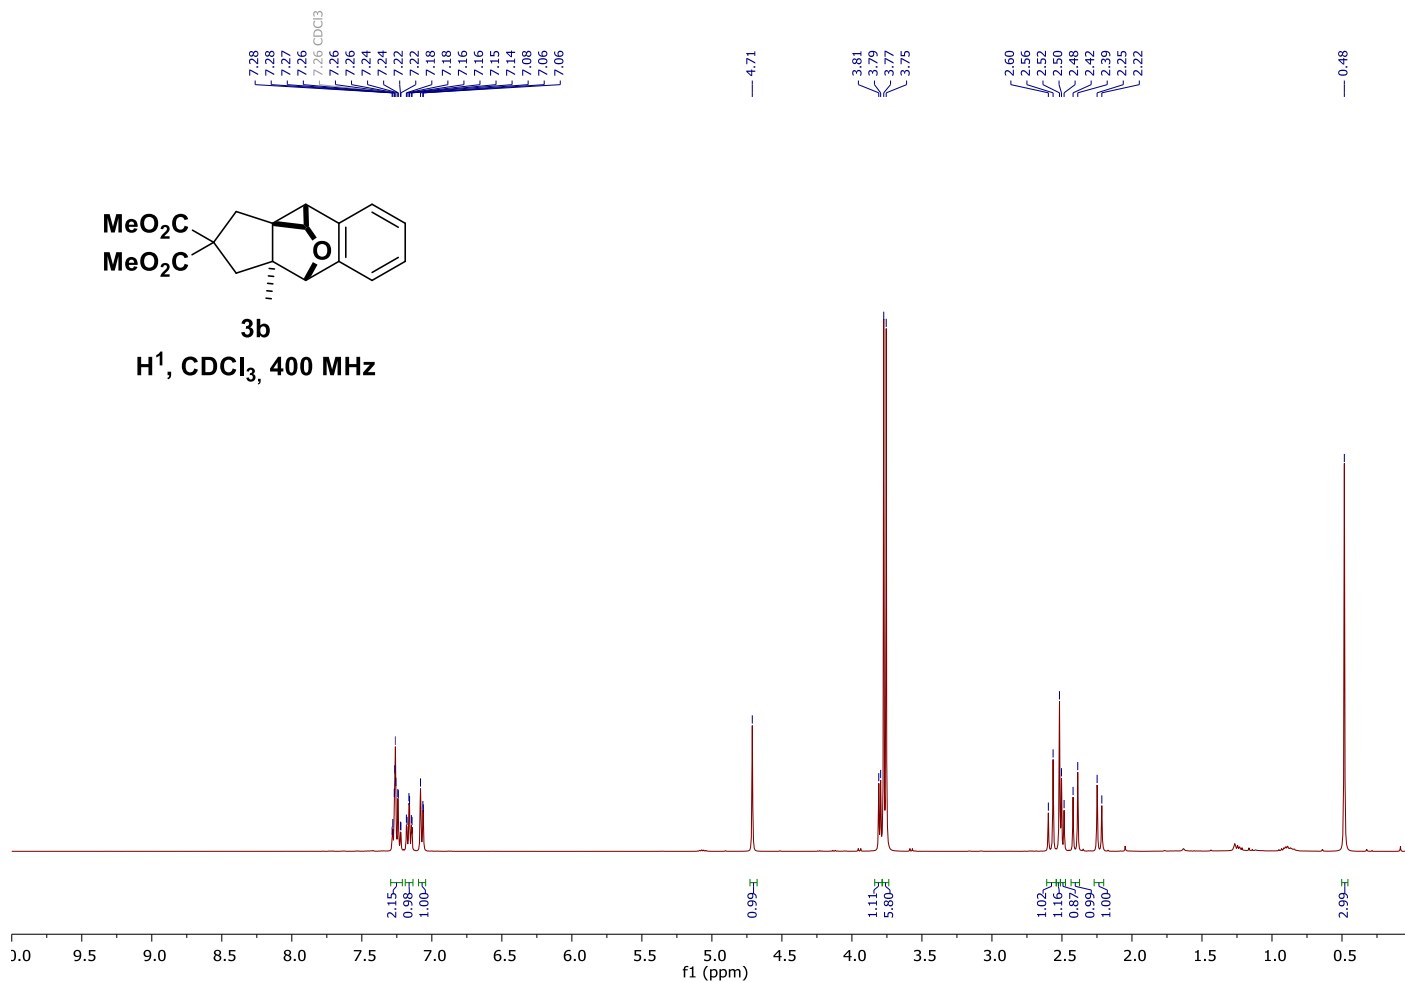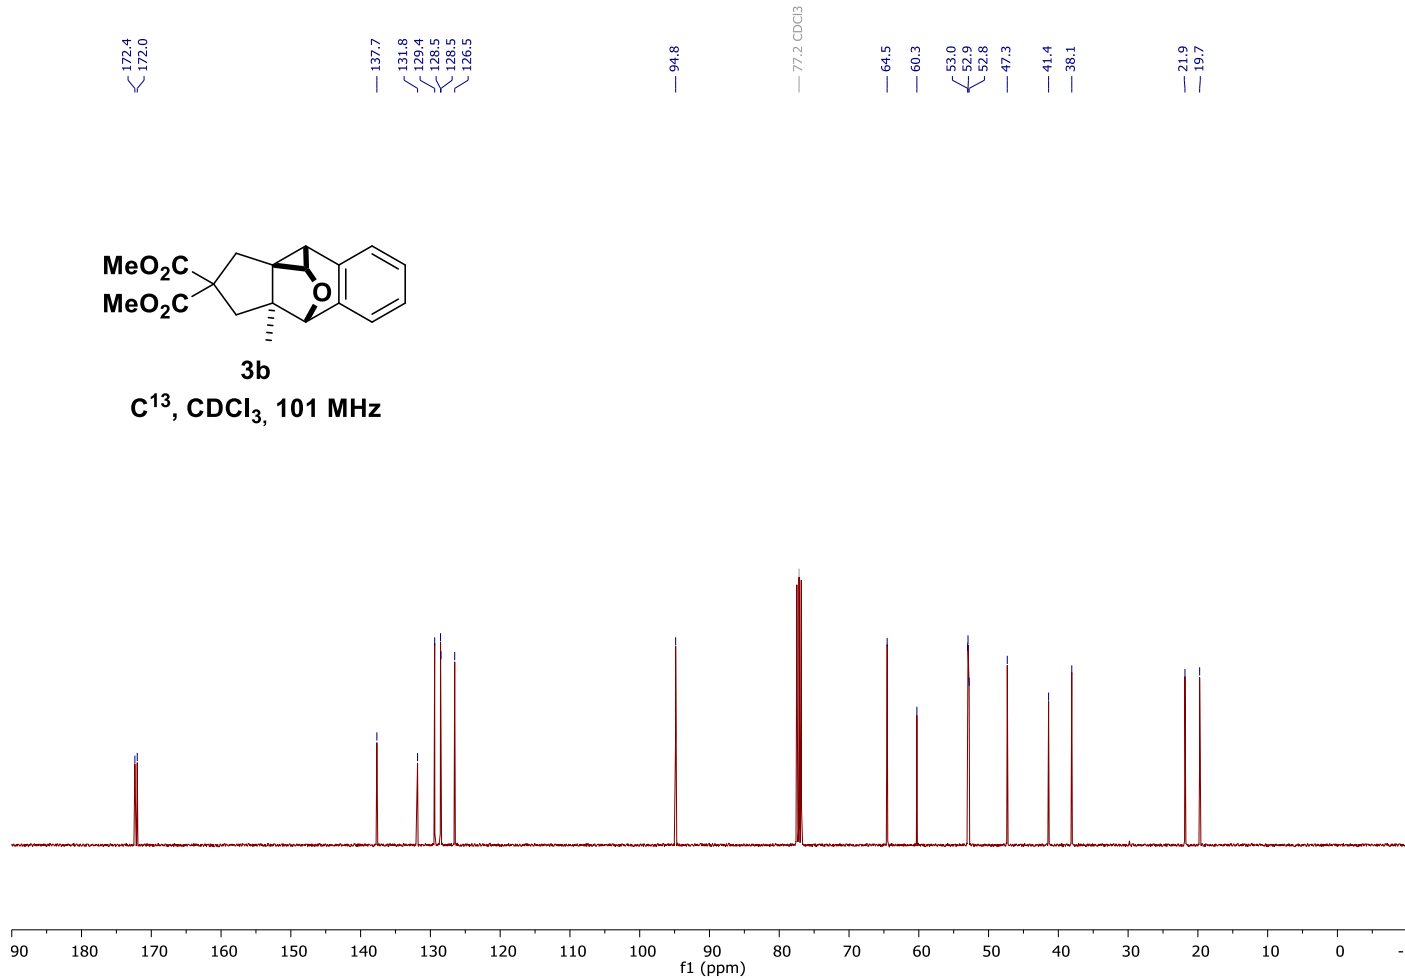

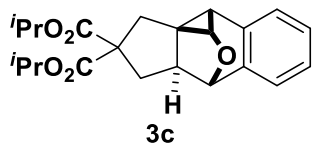

**$^1\text{H}$ ,  $\text{CDCl}_3$ , 400 MHz**

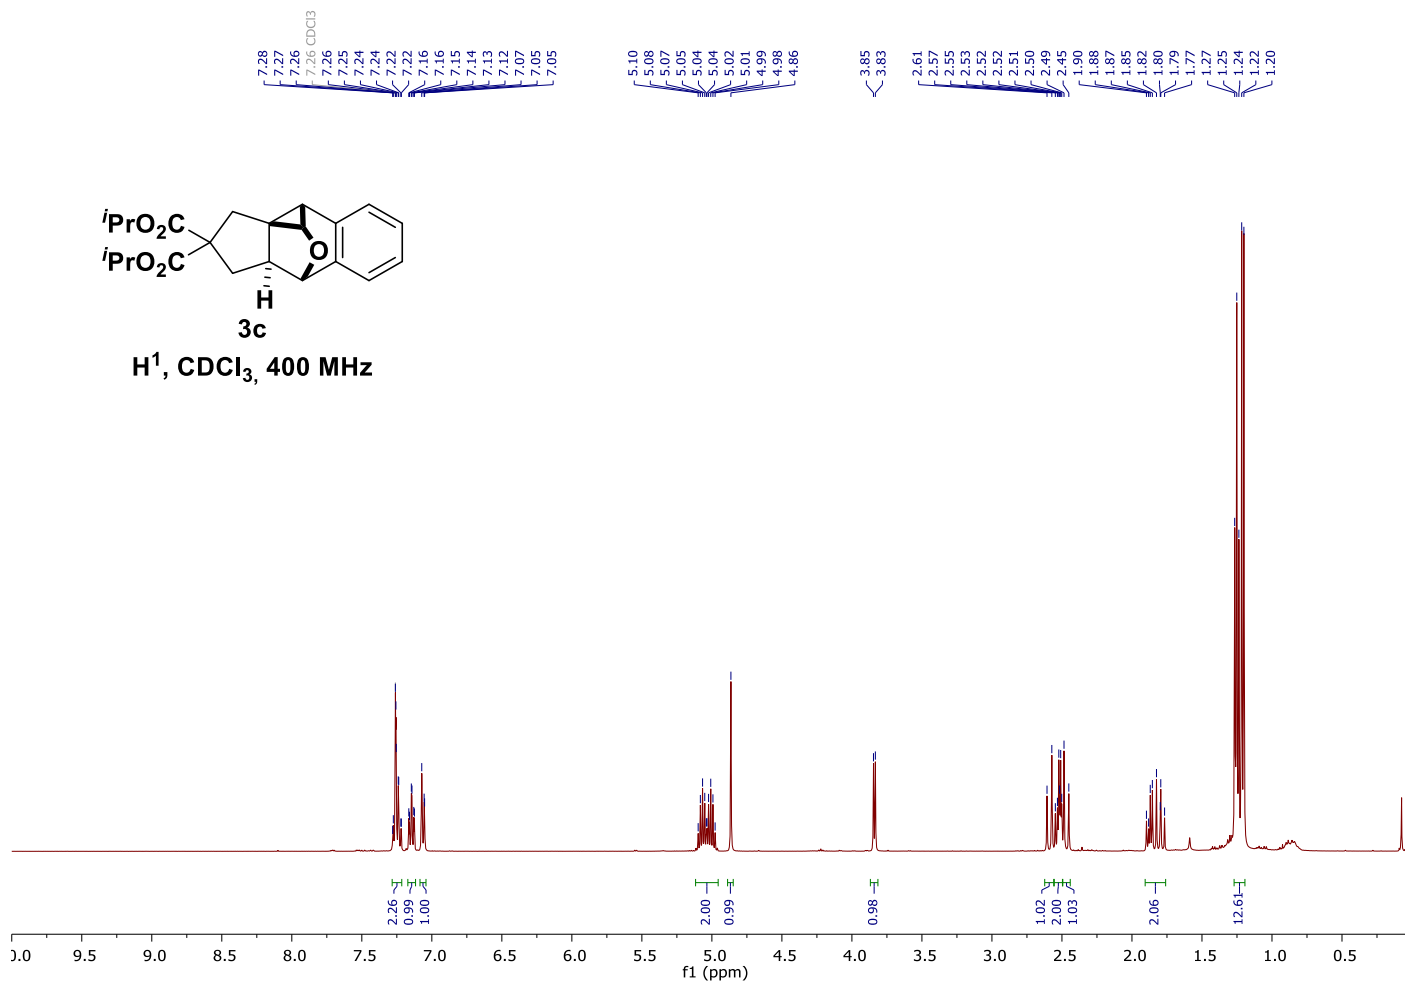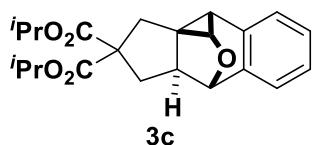

**$^{13}\text{C}$ ,  $\text{CDCl}_3$ , 101 MHz**

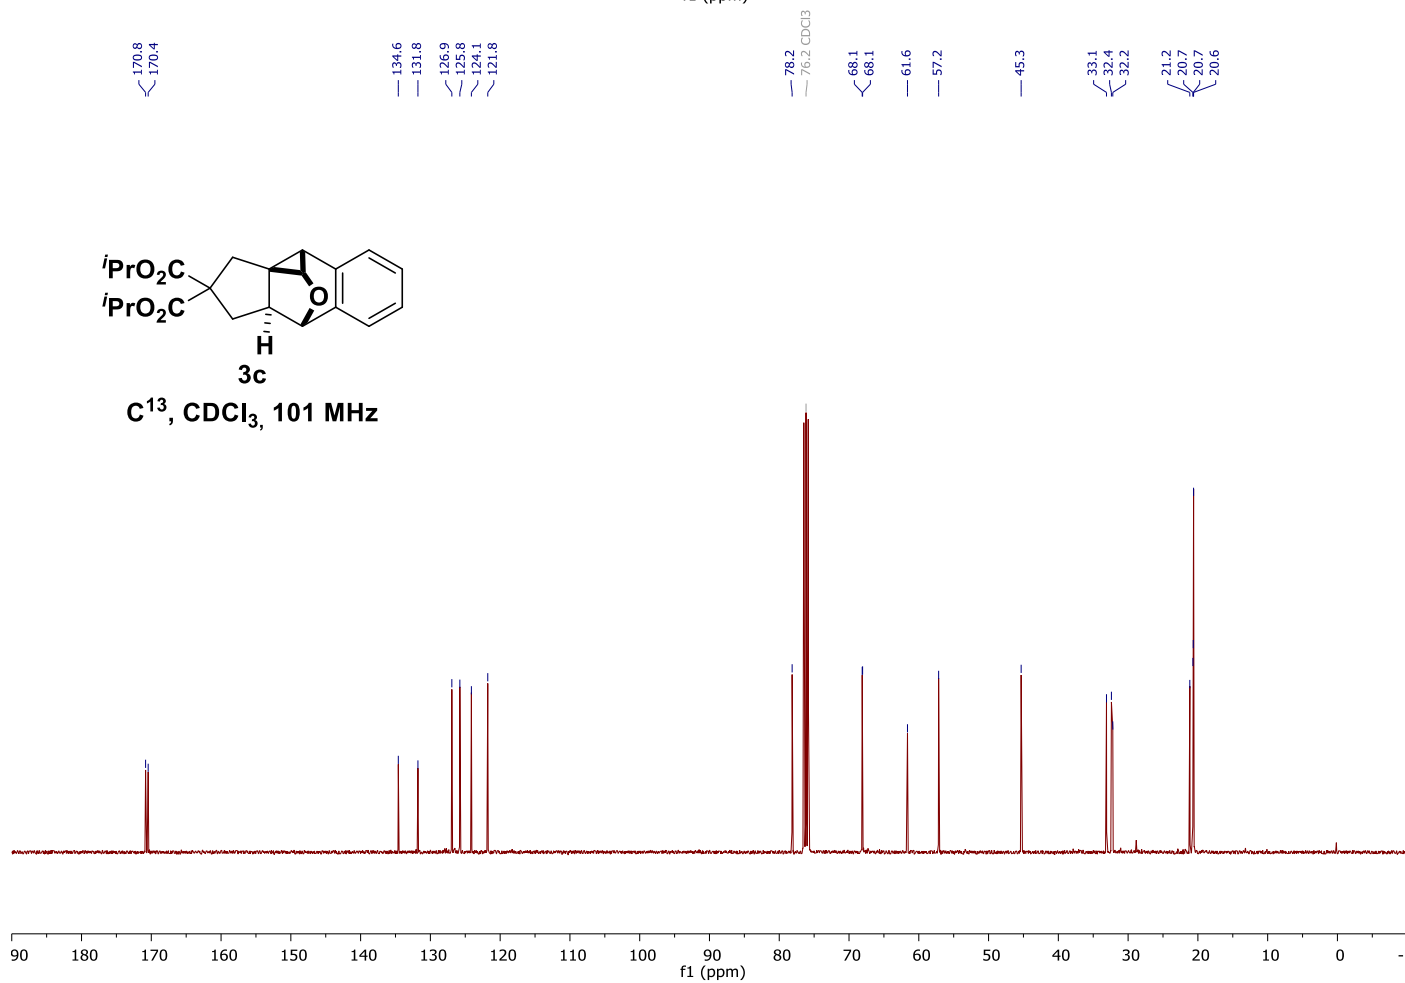

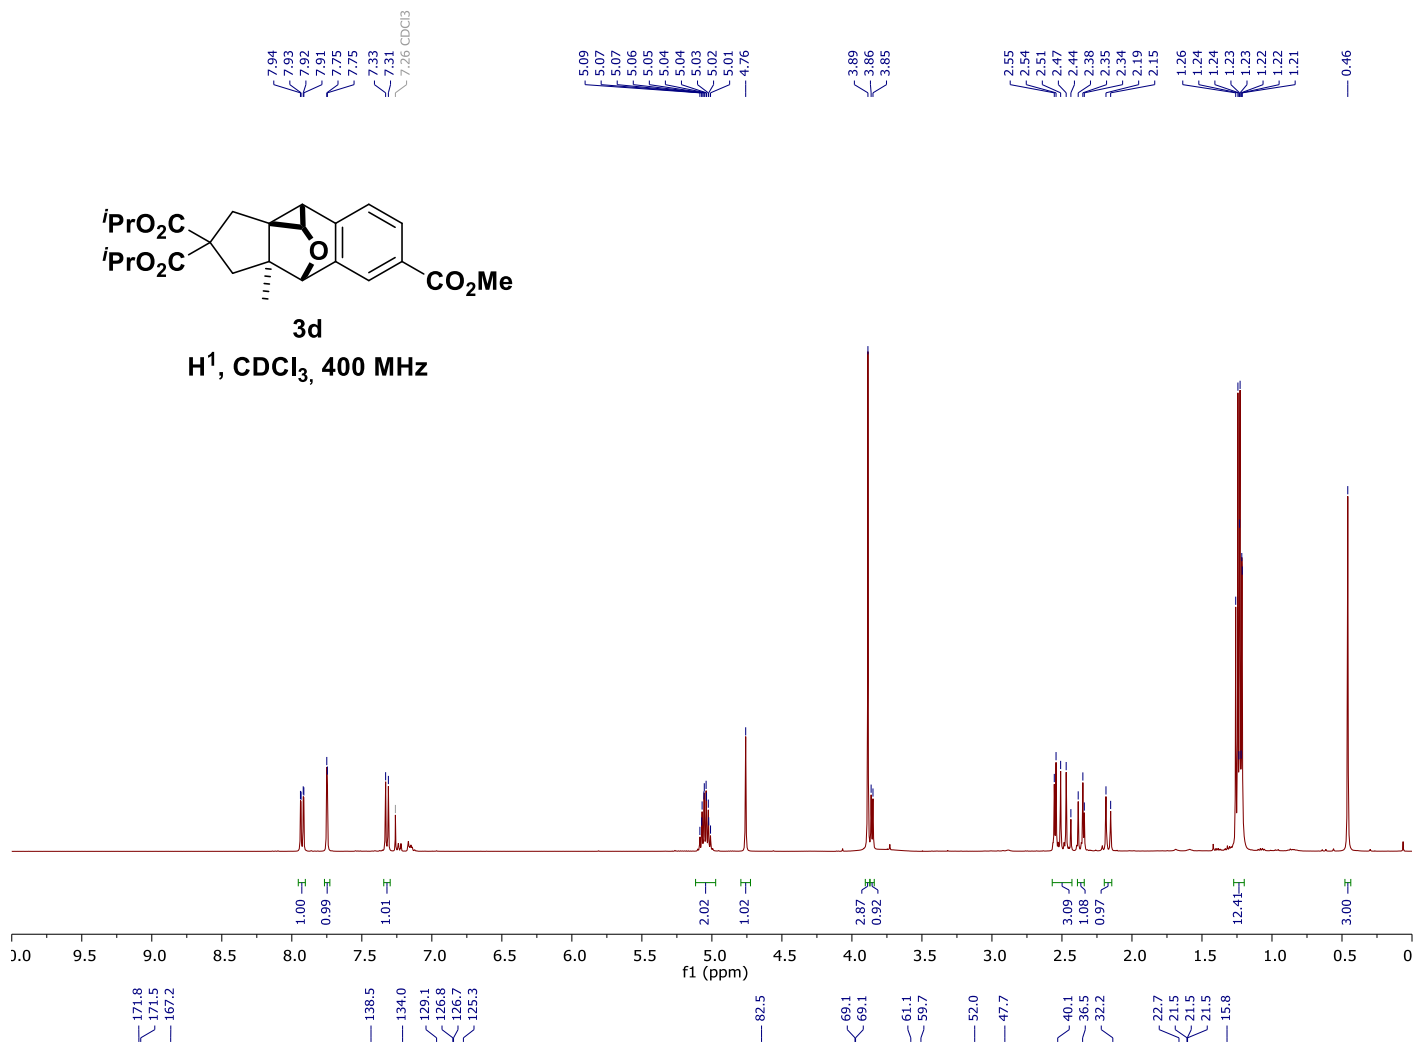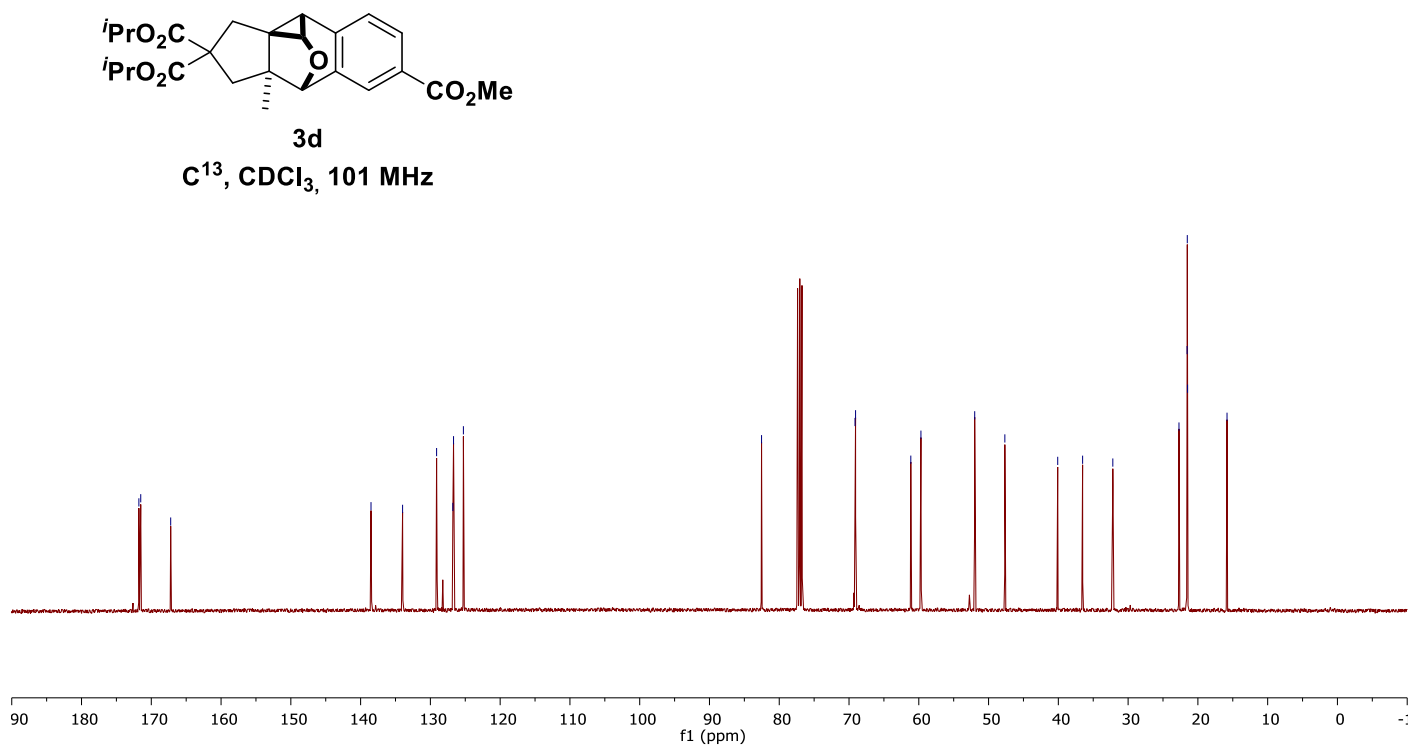

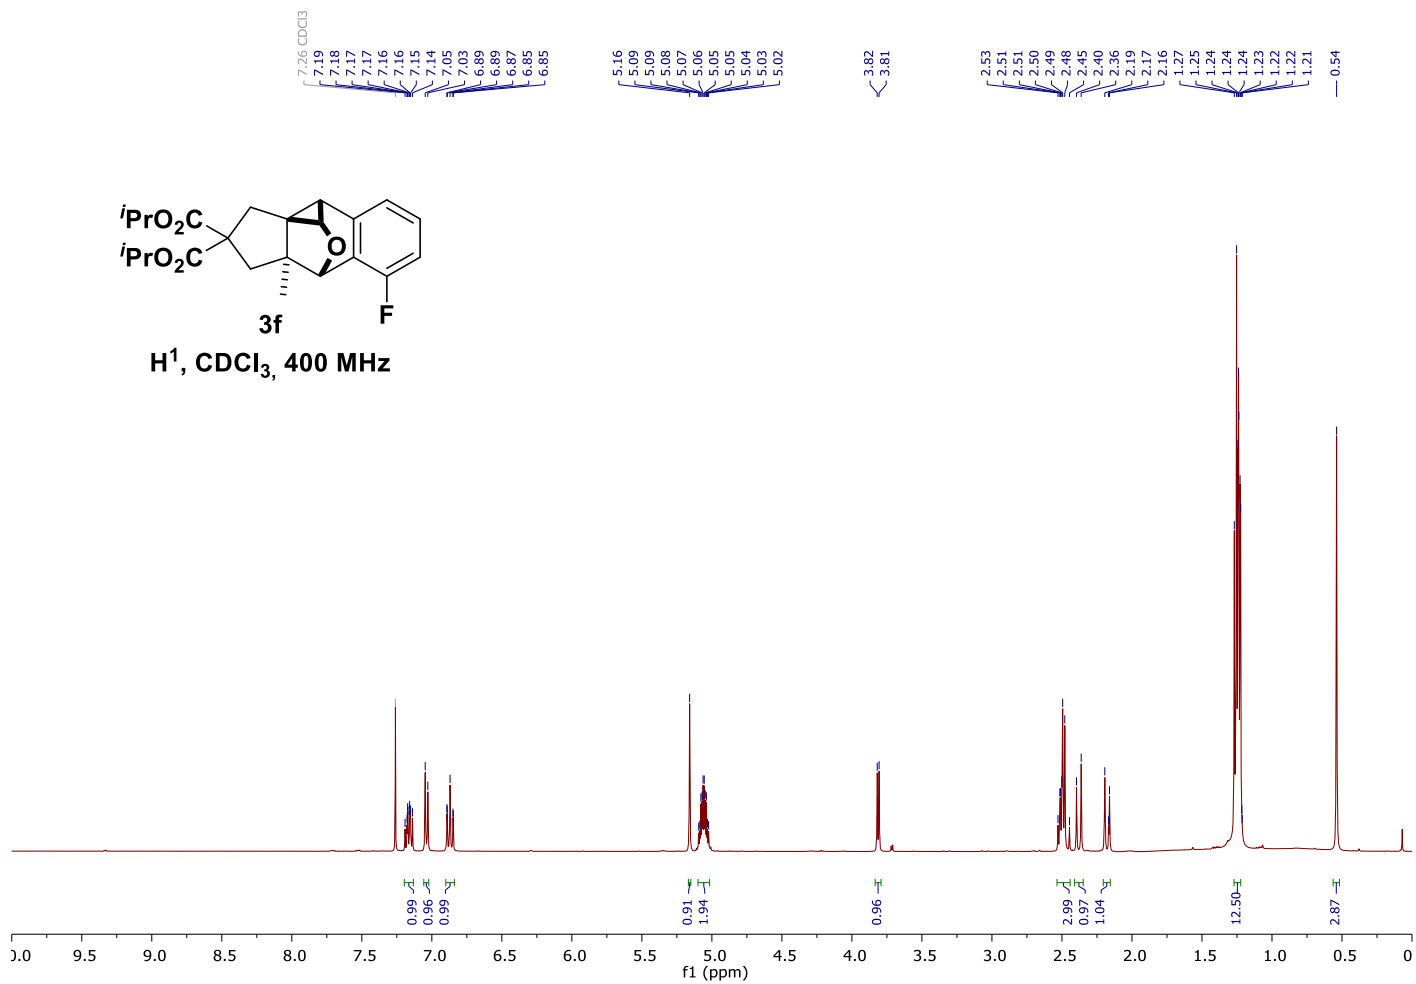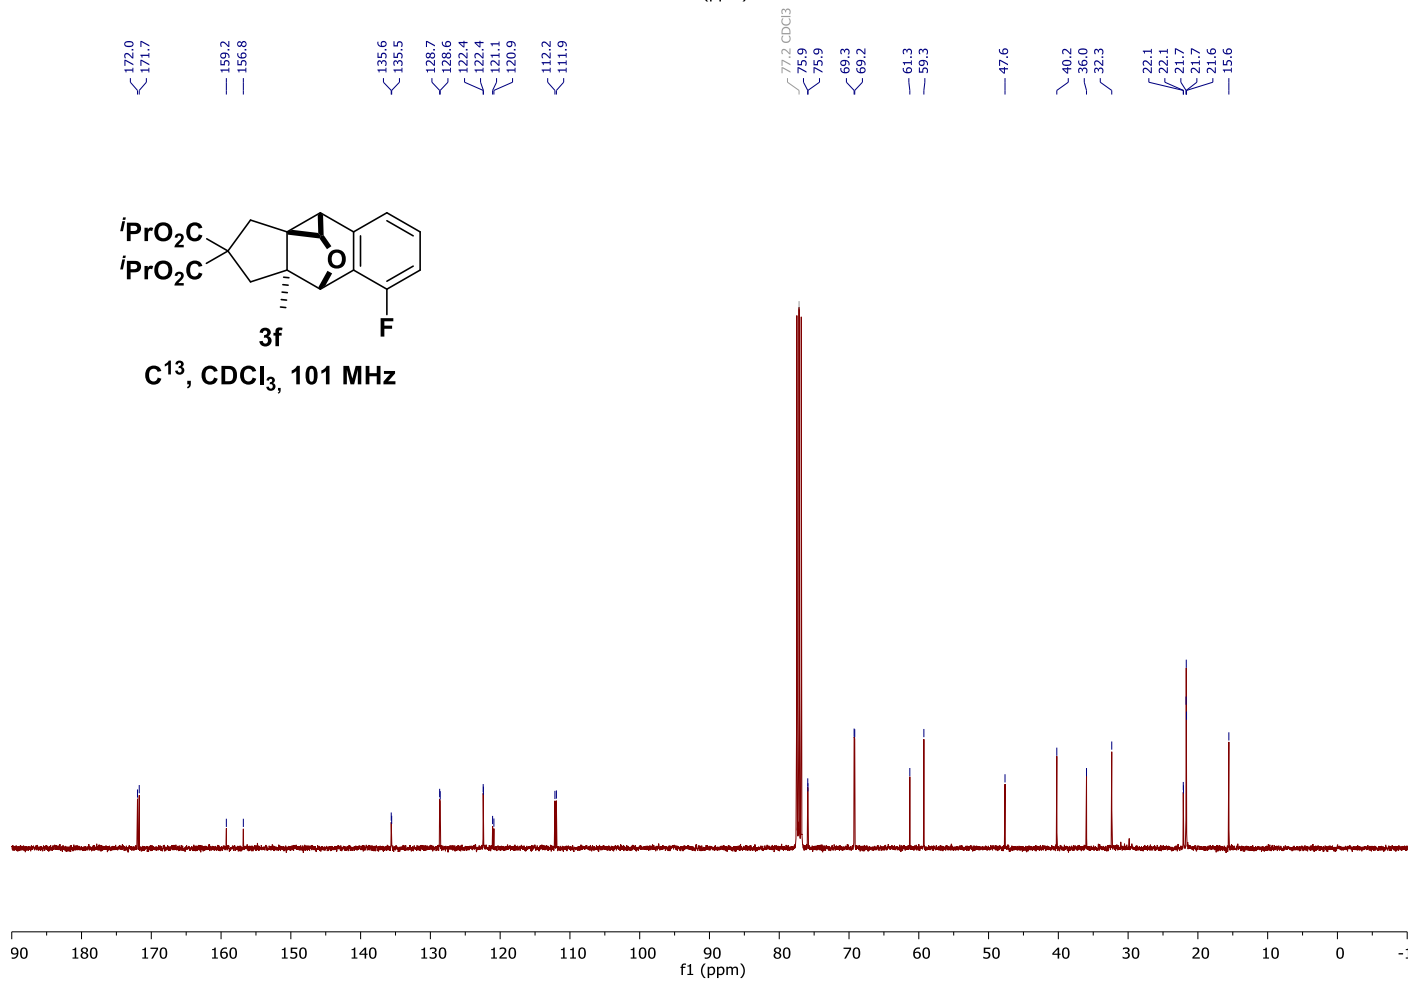



-127.16

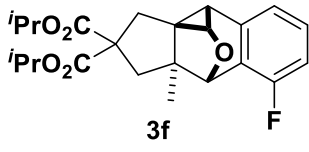

F<sup>19</sup>, CDCl<sub>3</sub>, 376 MHz

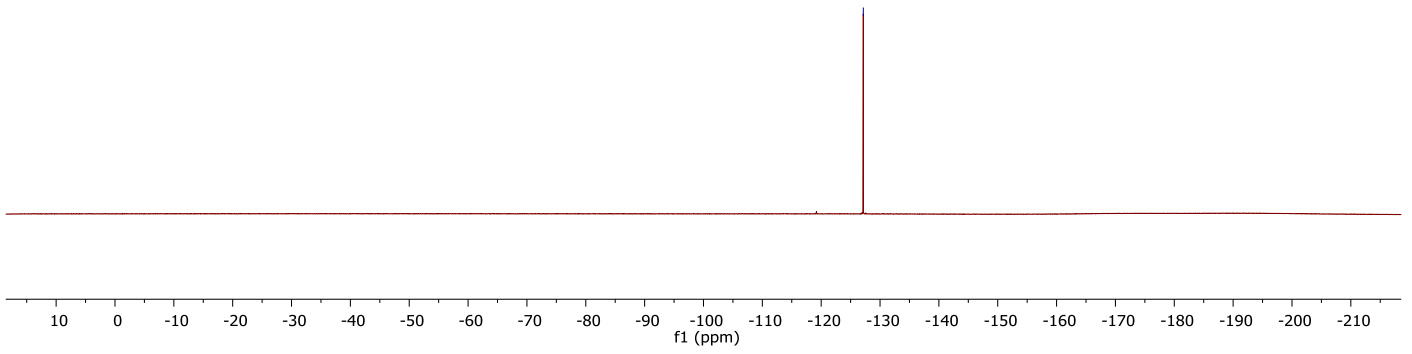

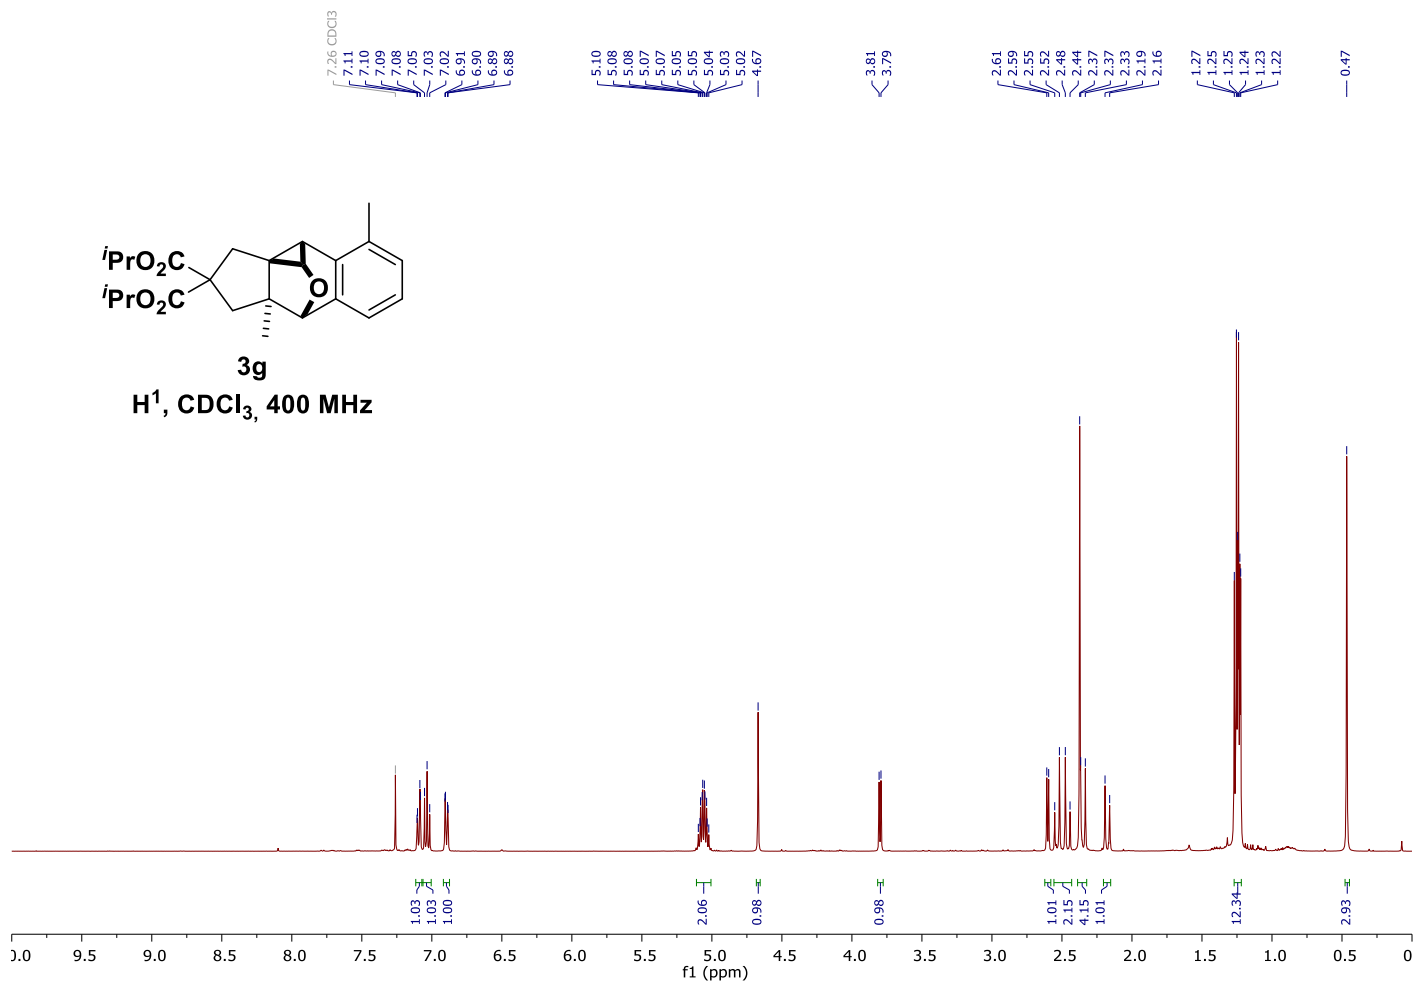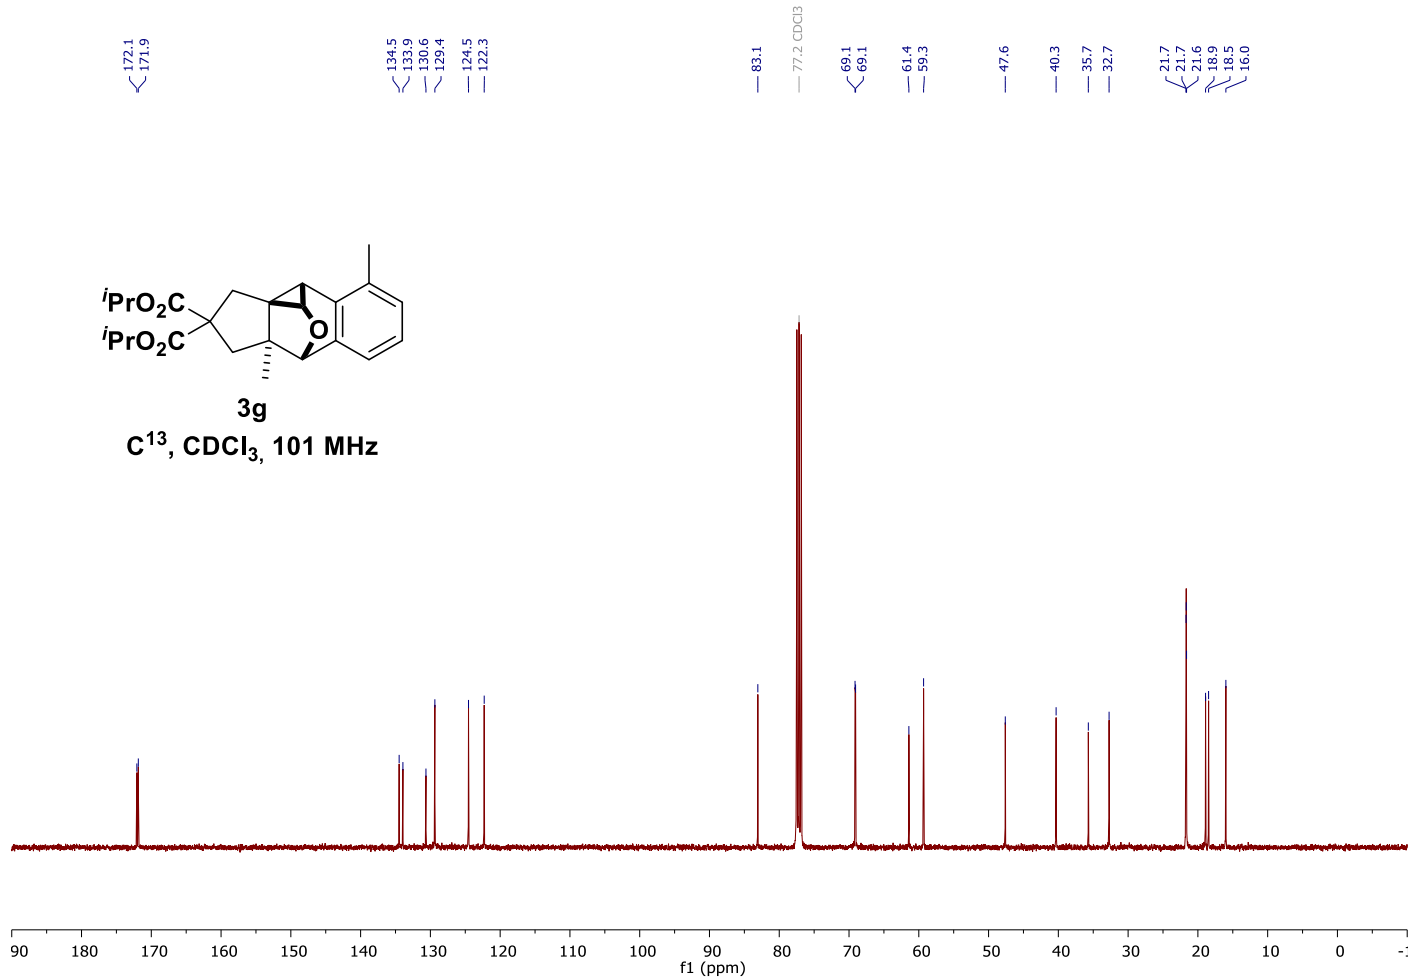

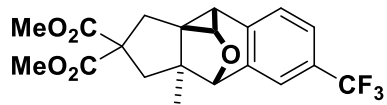

3i

H<sup>1</sup>, CDCl<sub>3</sub>, 400 MHz

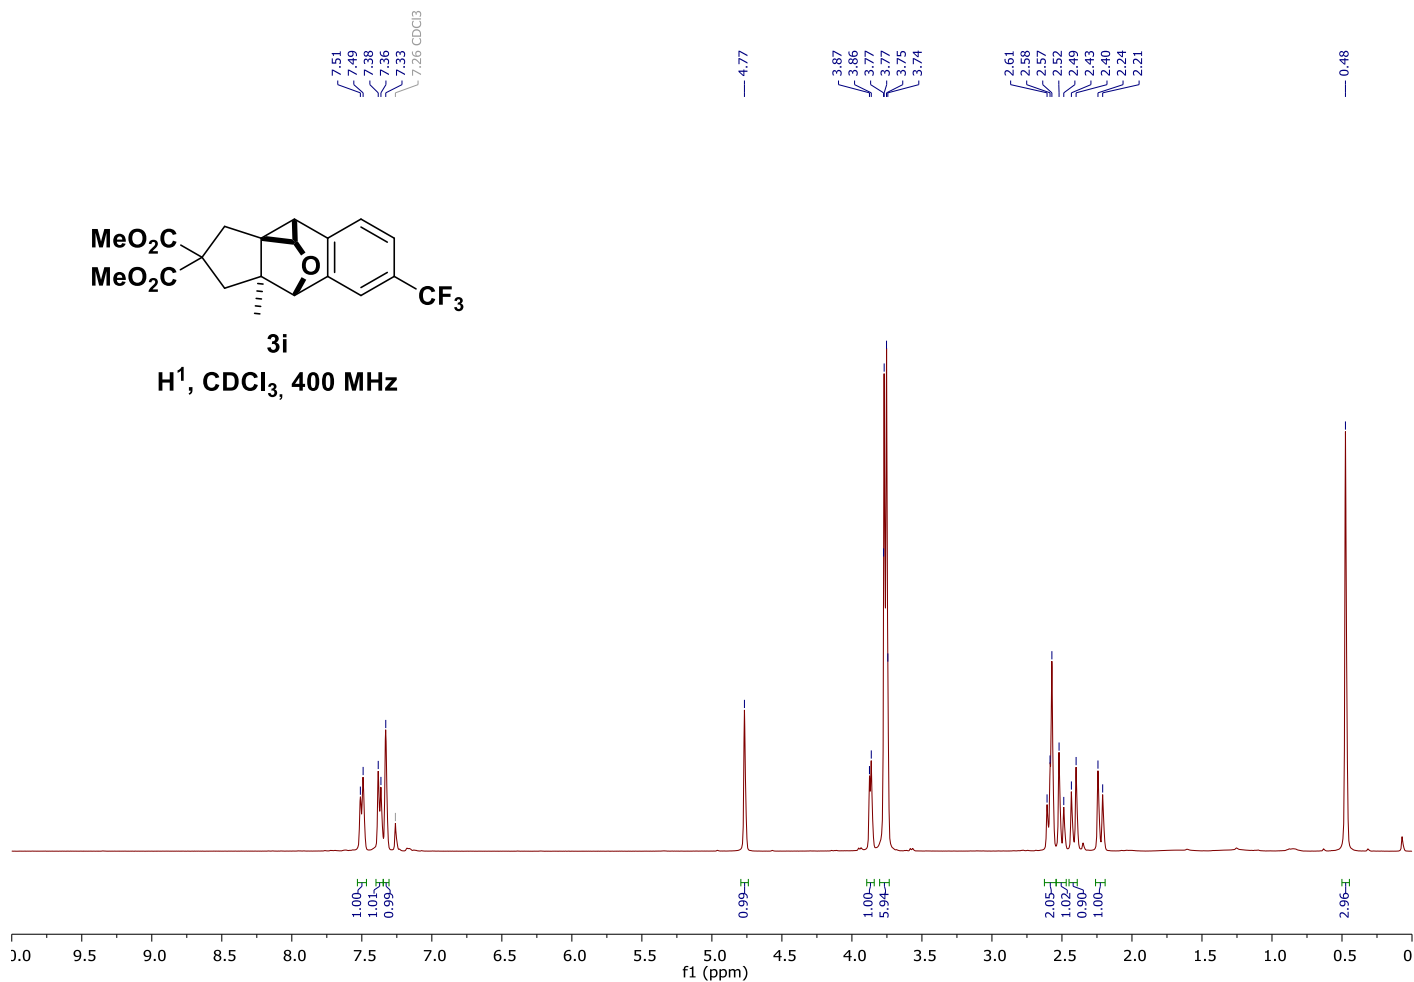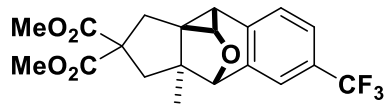

3i

C<sup>13</sup>, CDCl<sub>3</sub>, 101 MHz

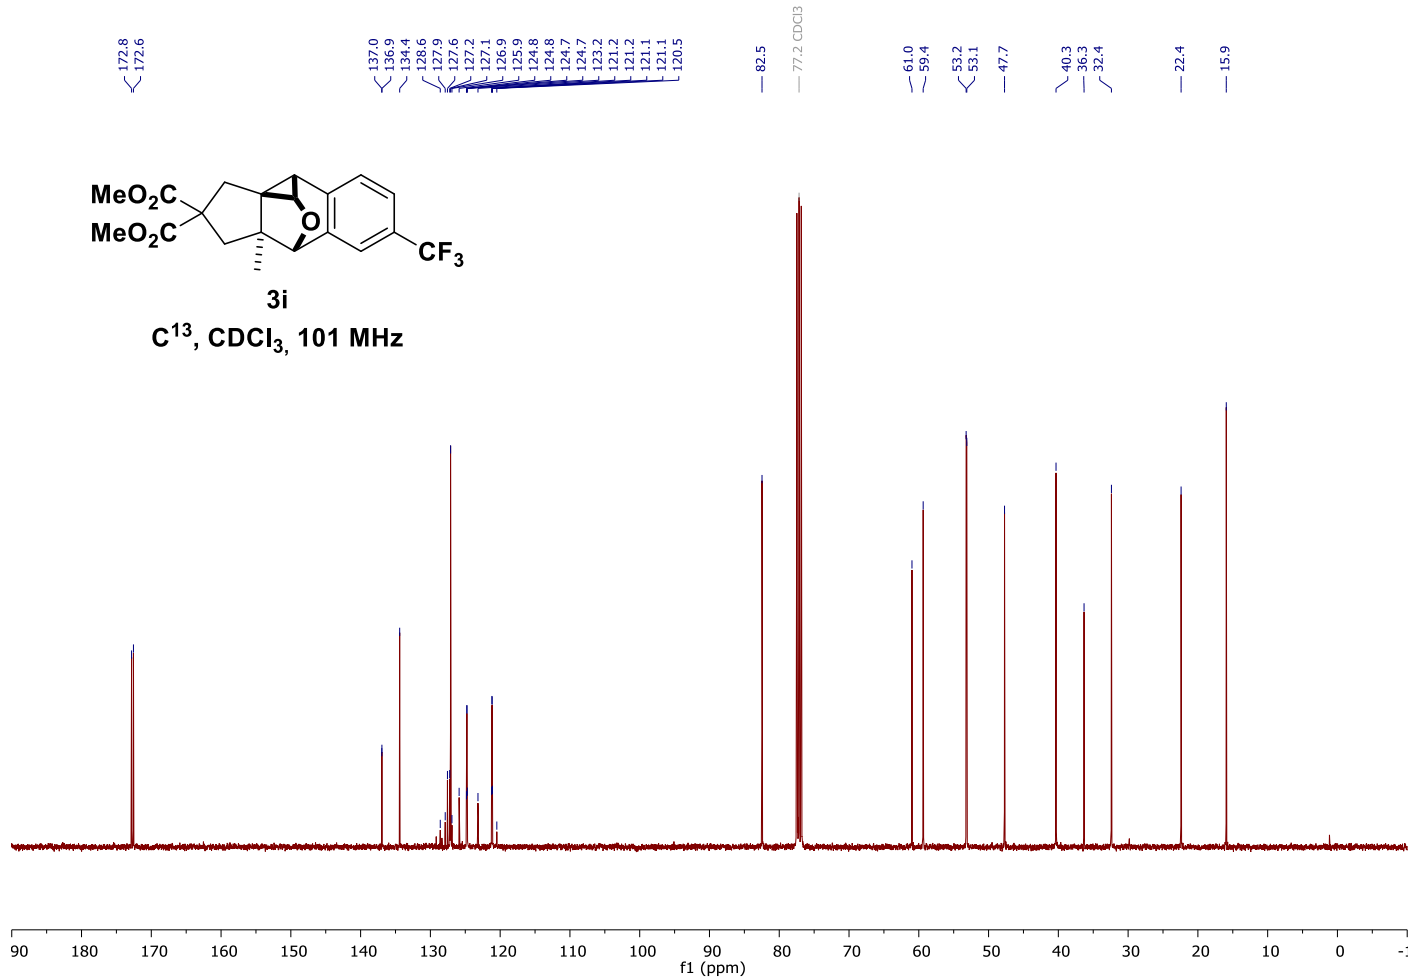

—61.88

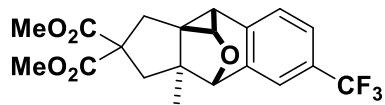

**3i**

**F<sup>19</sup>, CDCl<sub>3</sub>, 376 MHz**

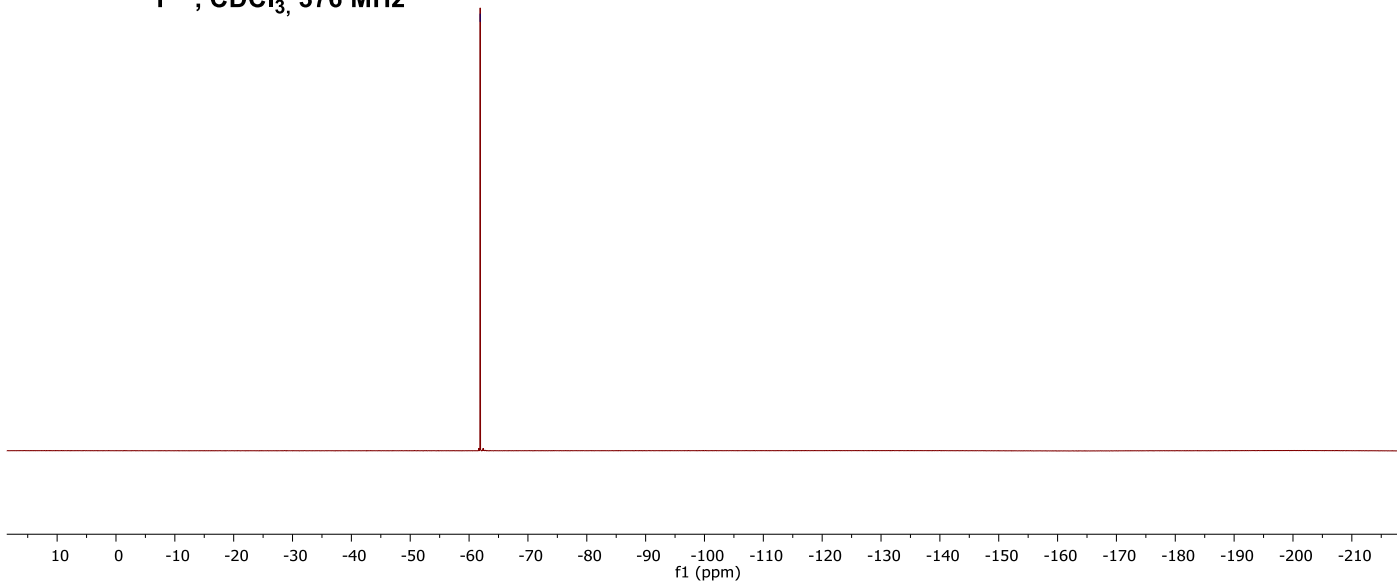

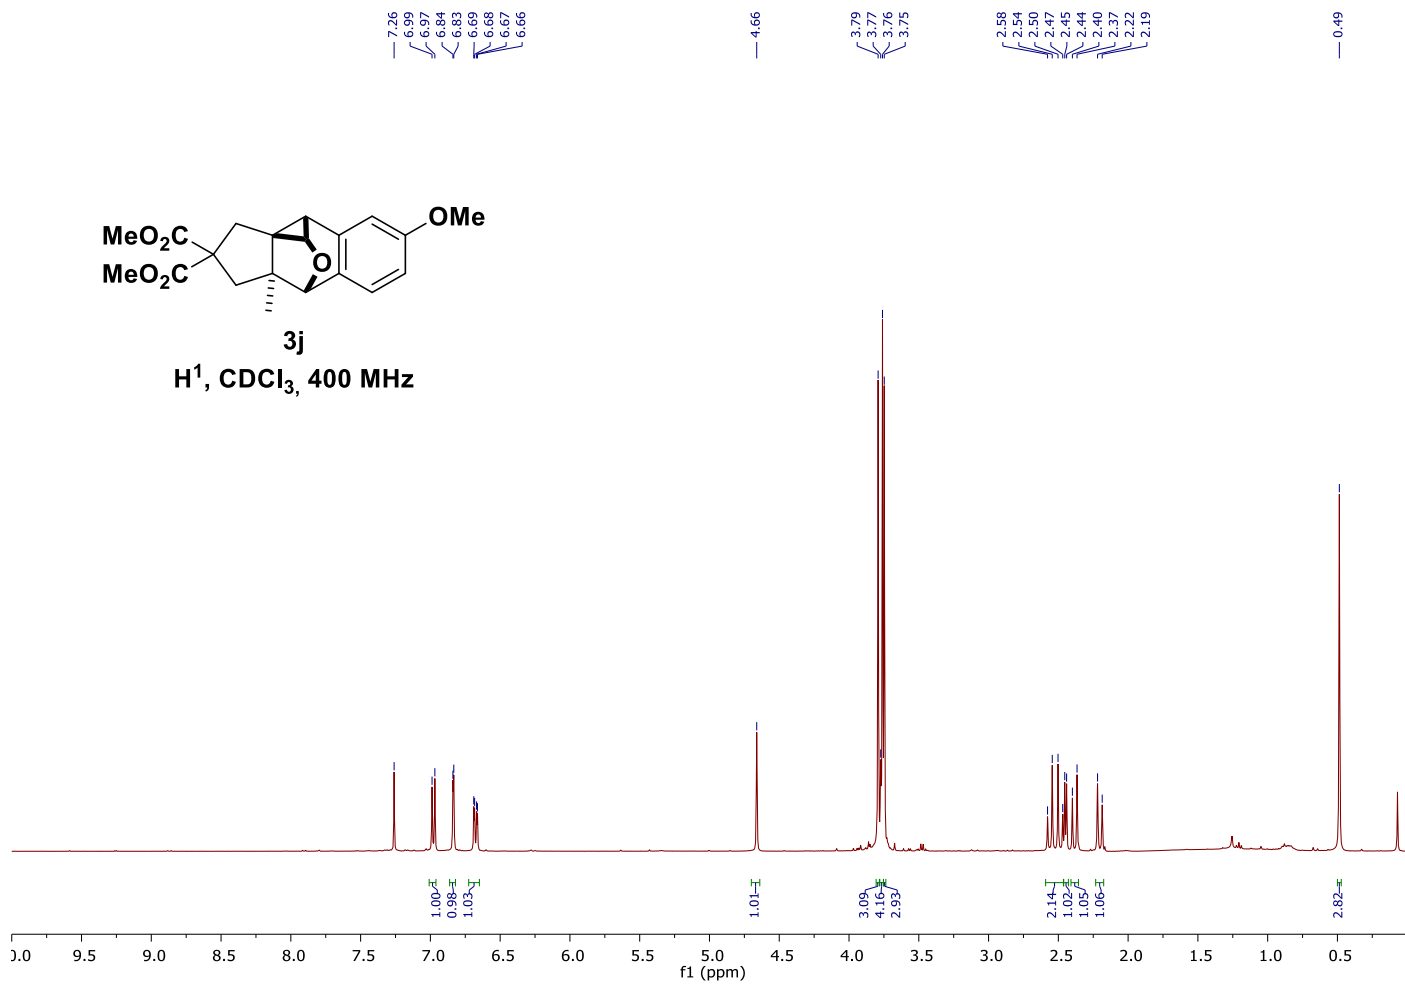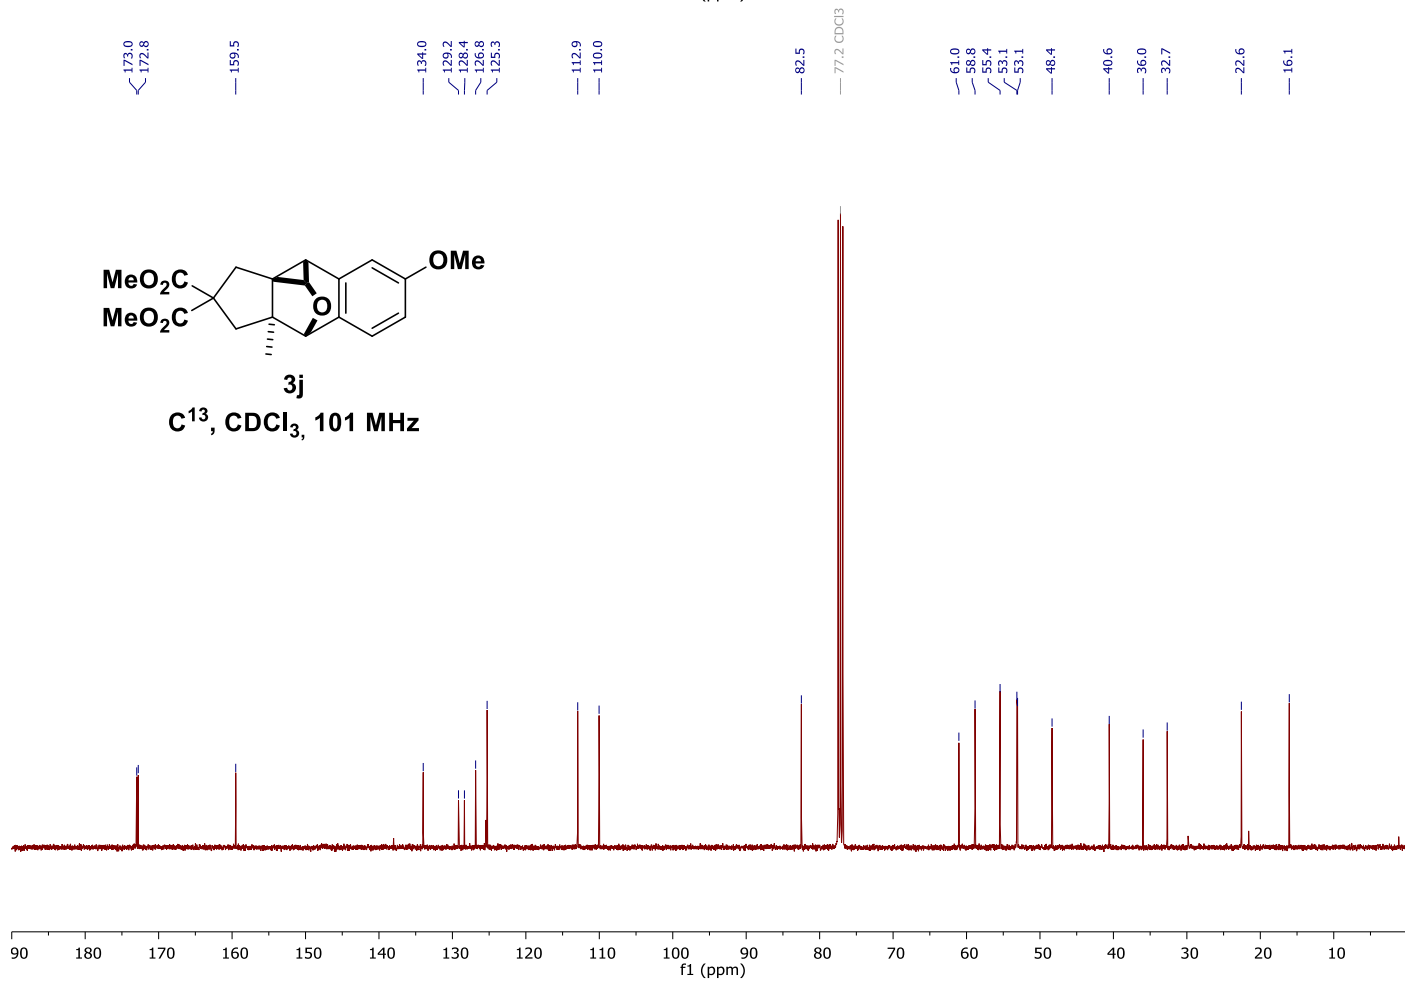

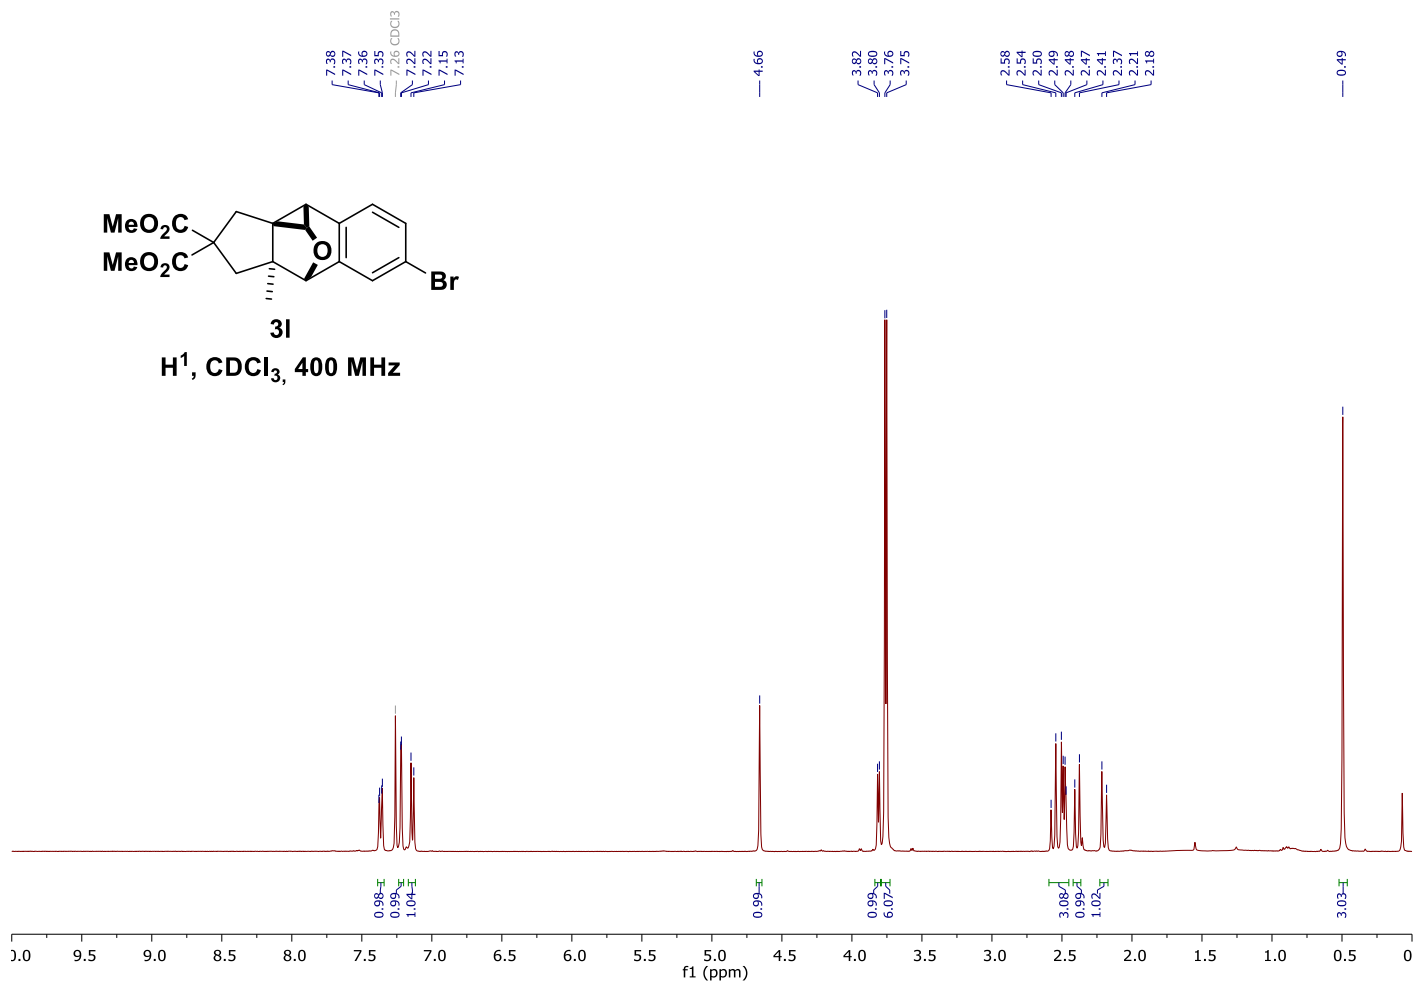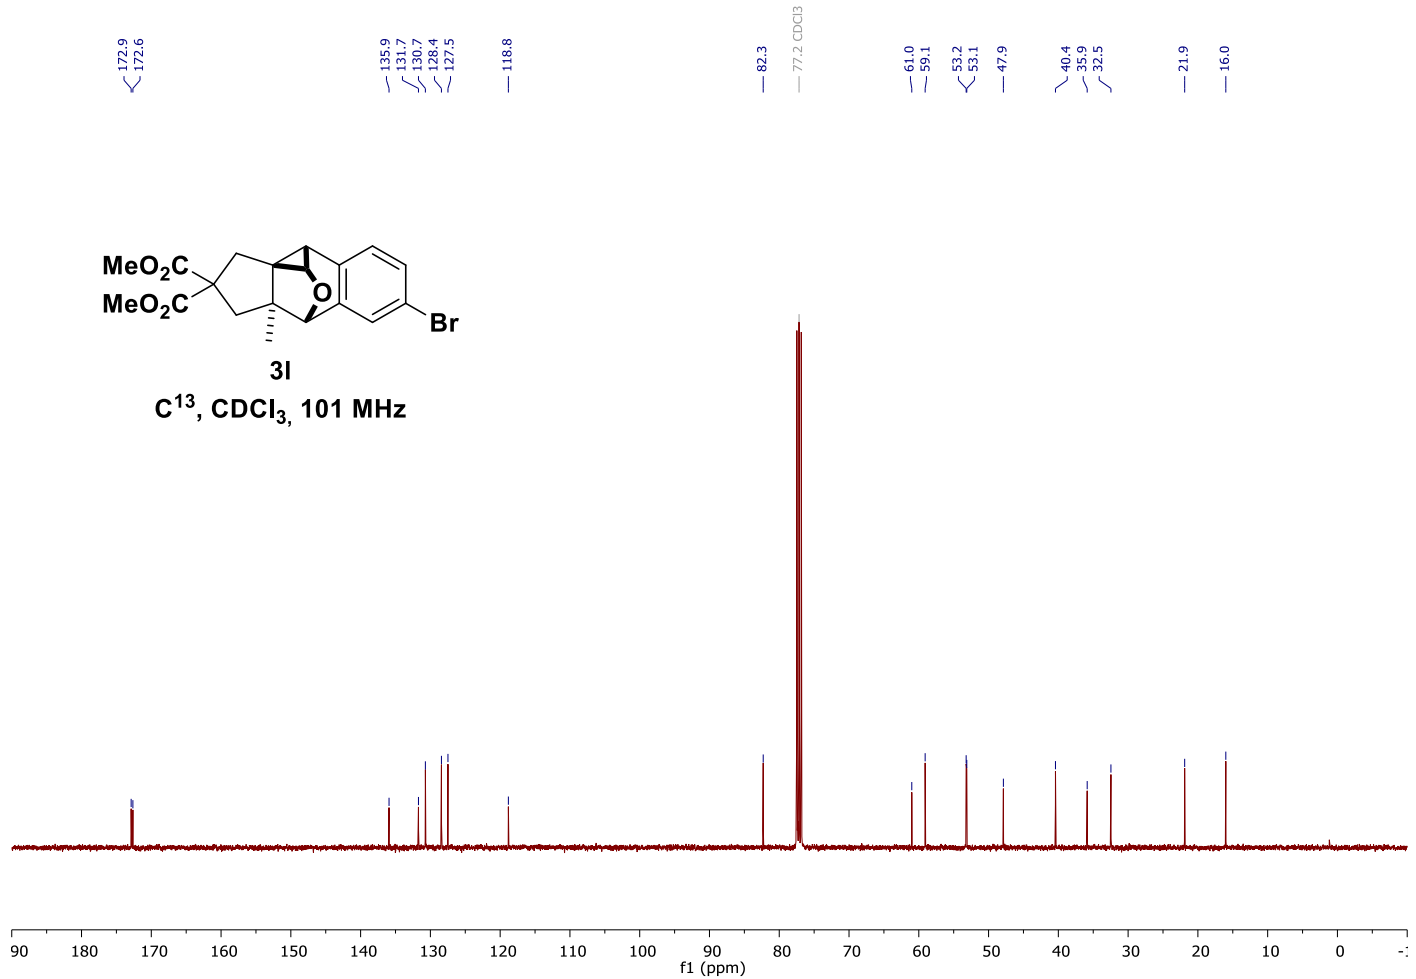

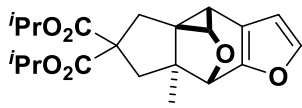

**3n**

**$^1\text{H}$ ,  $\text{CDCl}_3$ , 400 MHz**

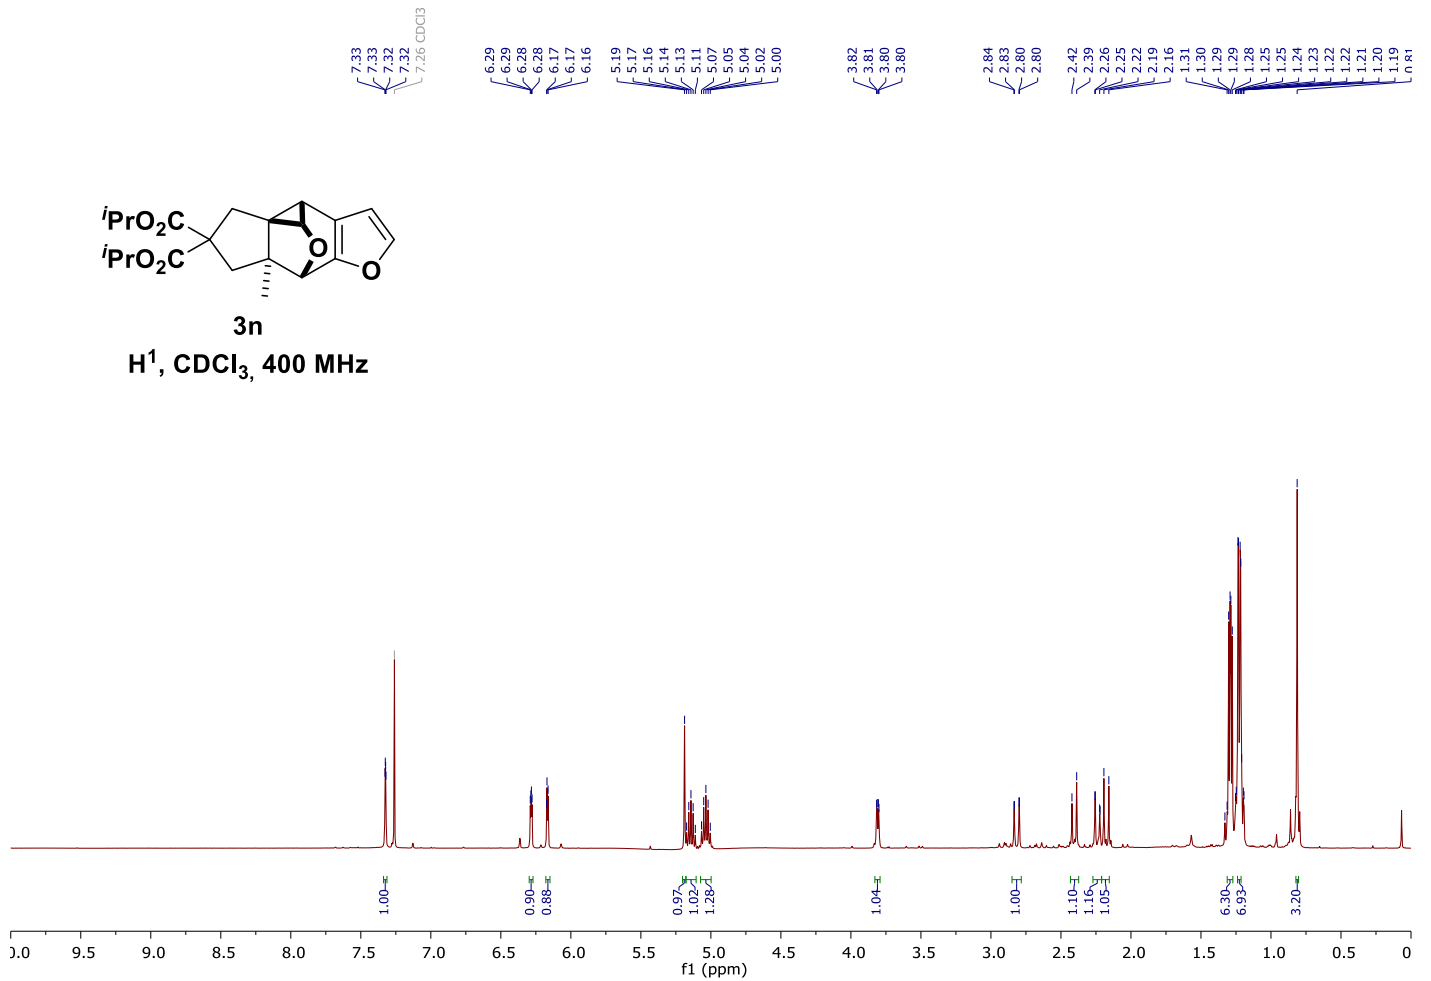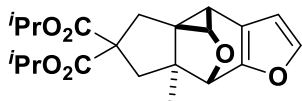

**3n**

**$^{13}\text{C}$ ,  $\text{CDCl}_3$ , 101 MHz**

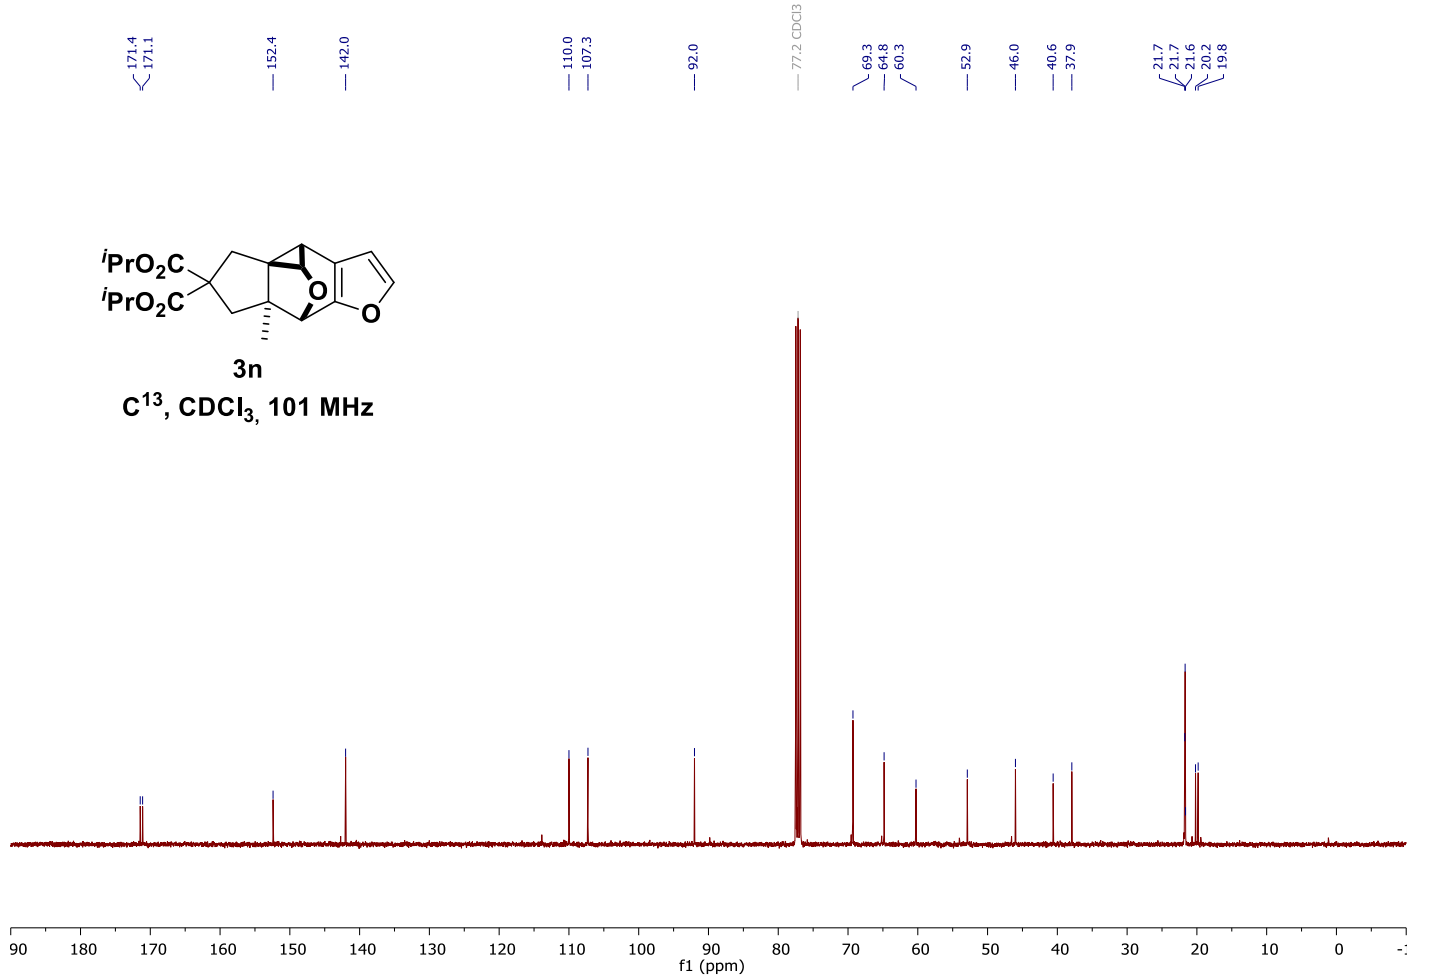

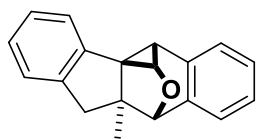

3r

$H^1$ ,  $CDCl_3$ , 400 MHz

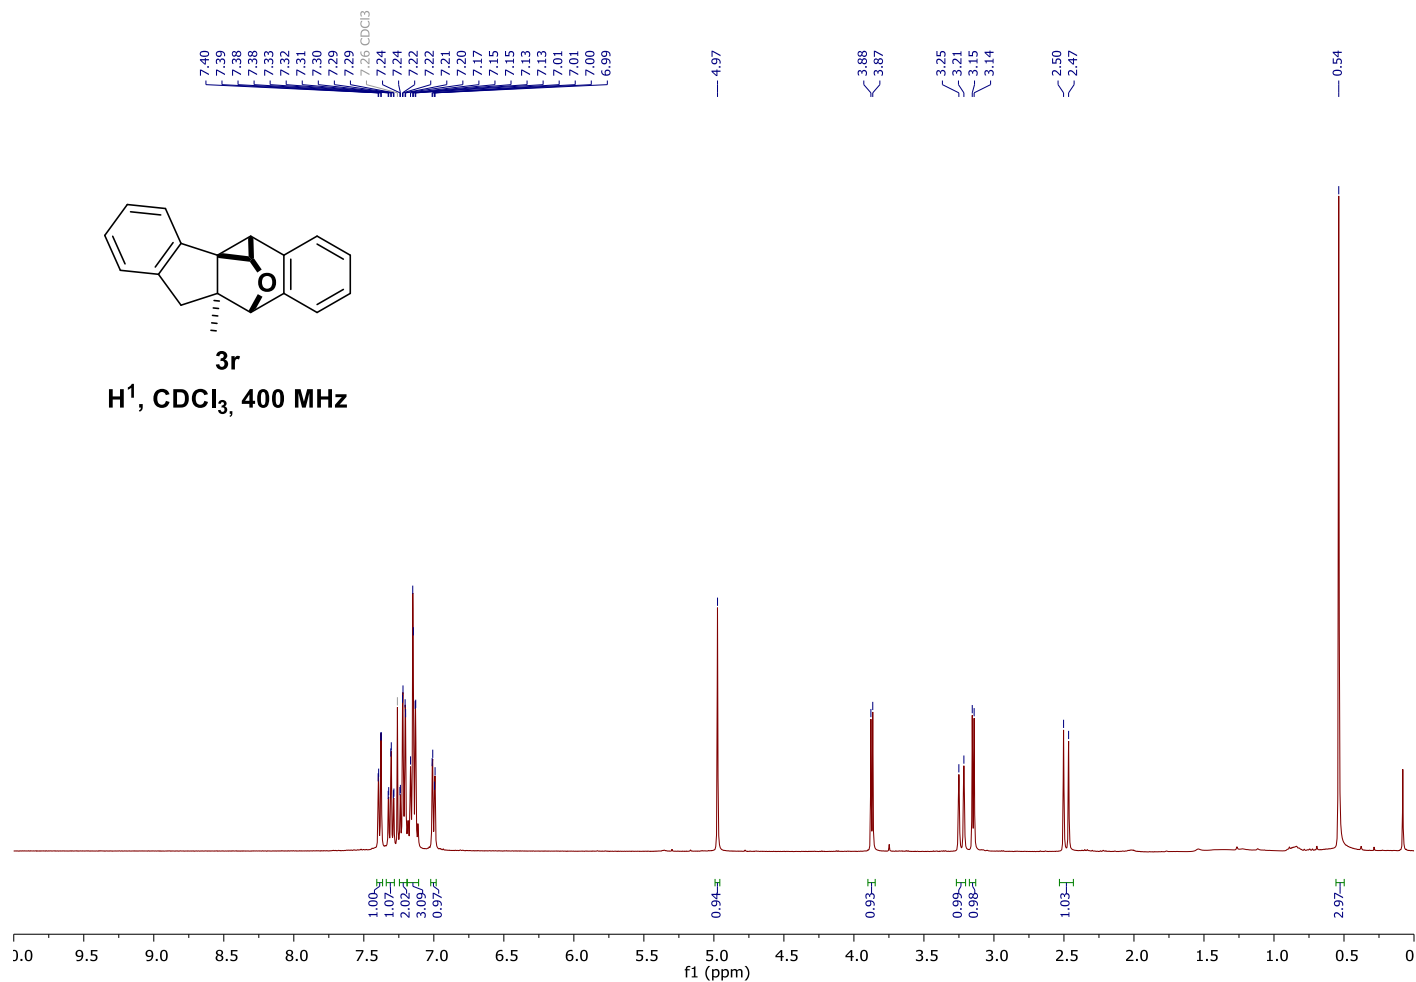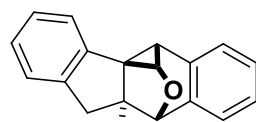

3r

$C^{13}$ ,  $CDCl_3$ , 101 MHz

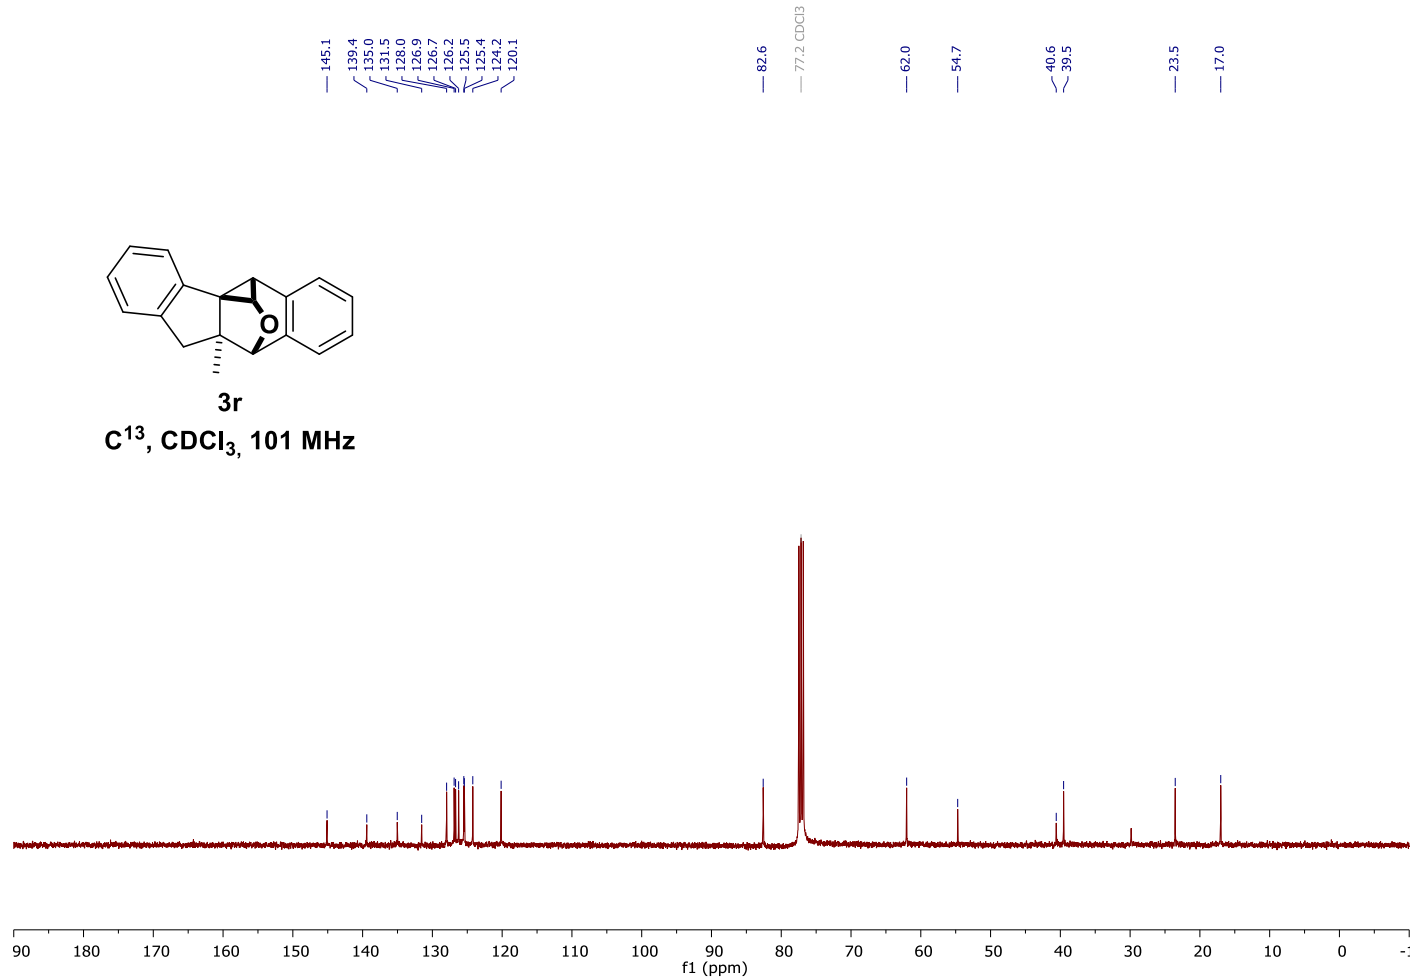



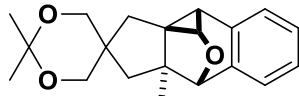

**3s**

**H<sup>1</sup>, CDCl<sub>3</sub>, 400 MHz**

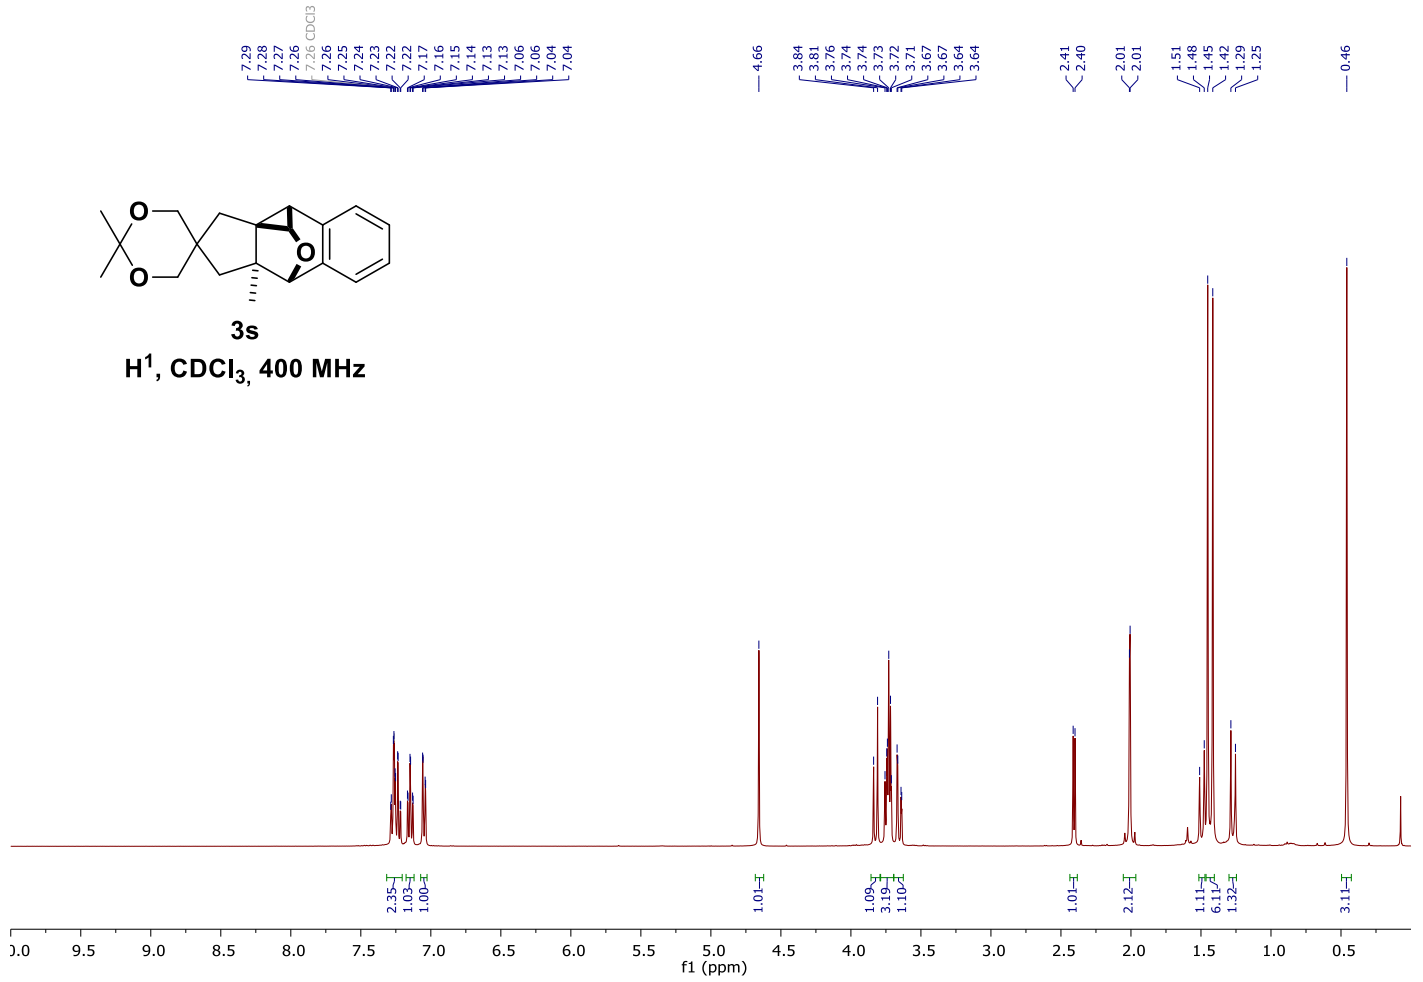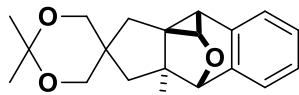

**3s**

**C<sup>13</sup>, CDCl<sub>3</sub>, 101 MHz**

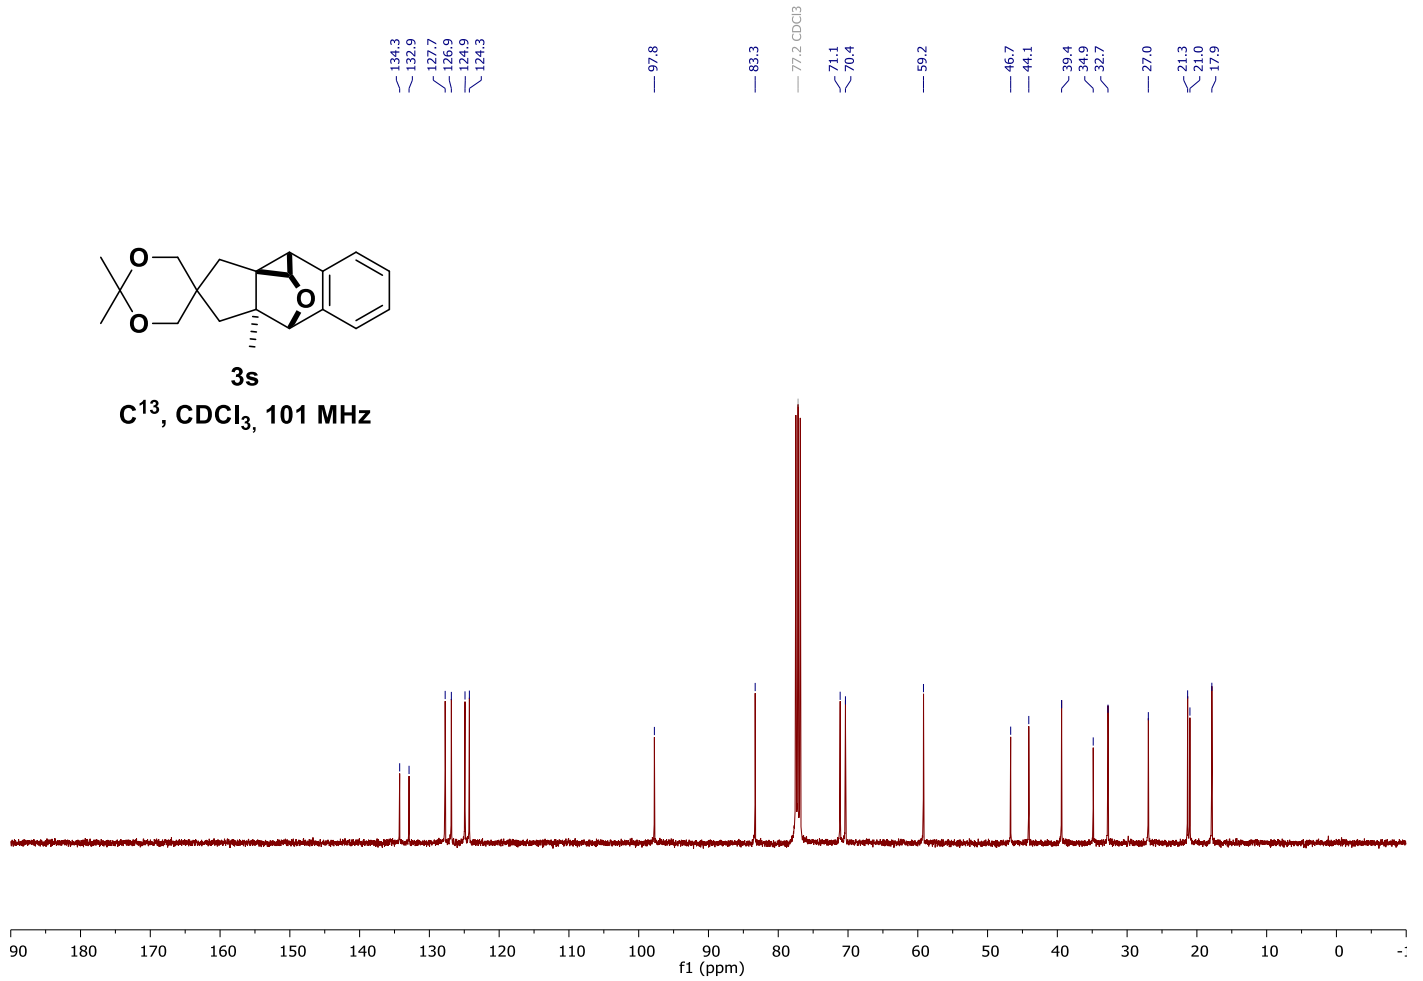

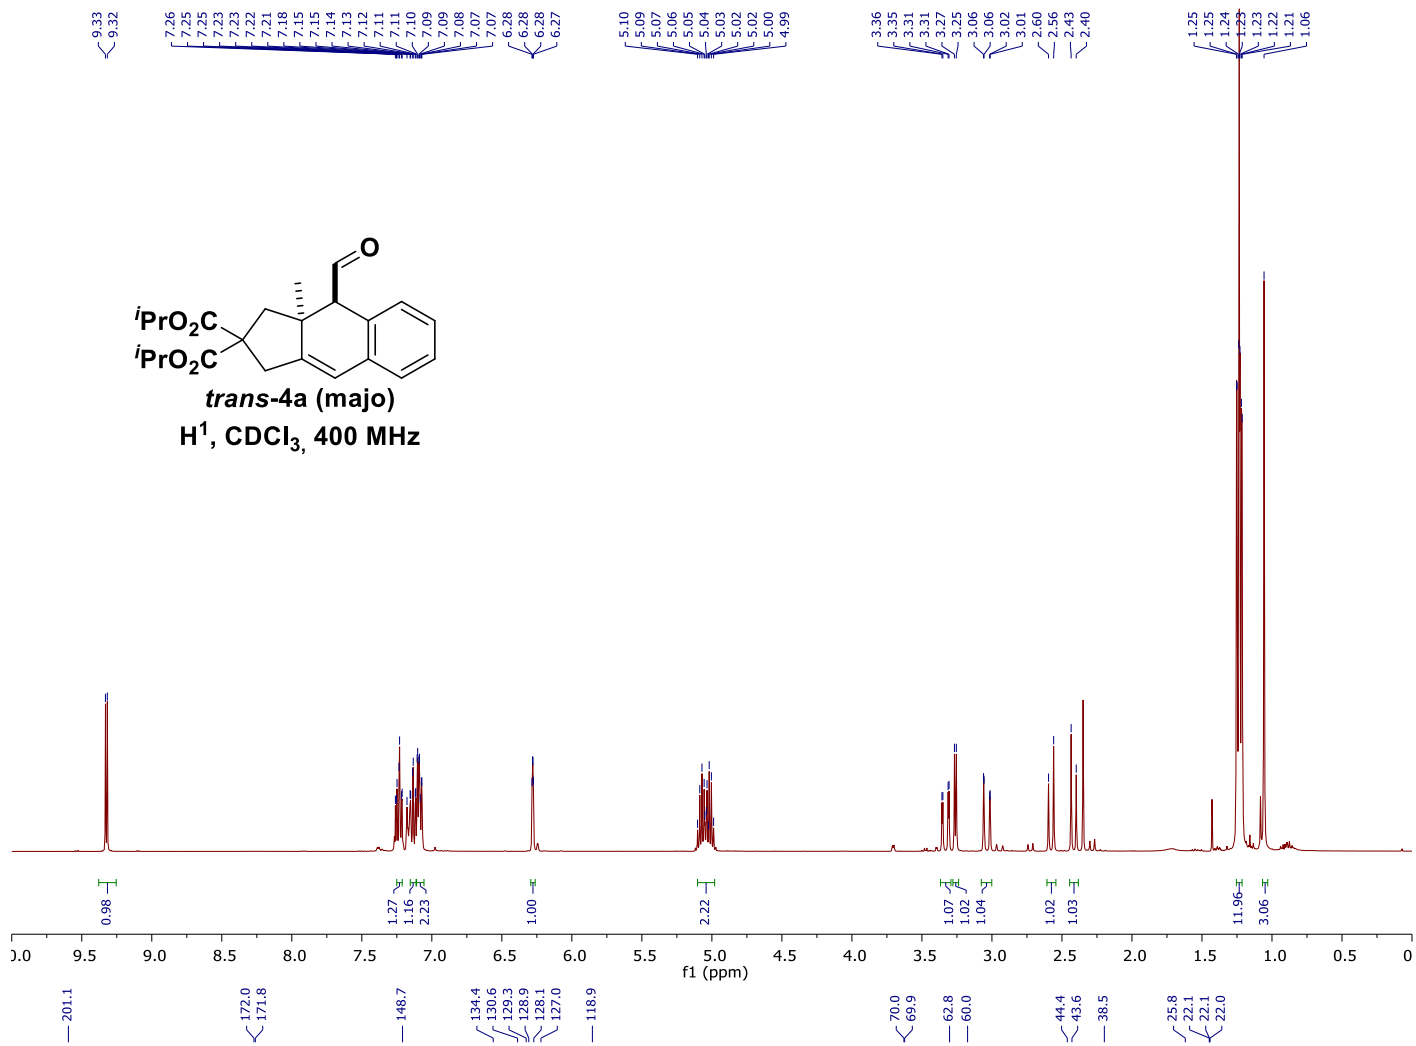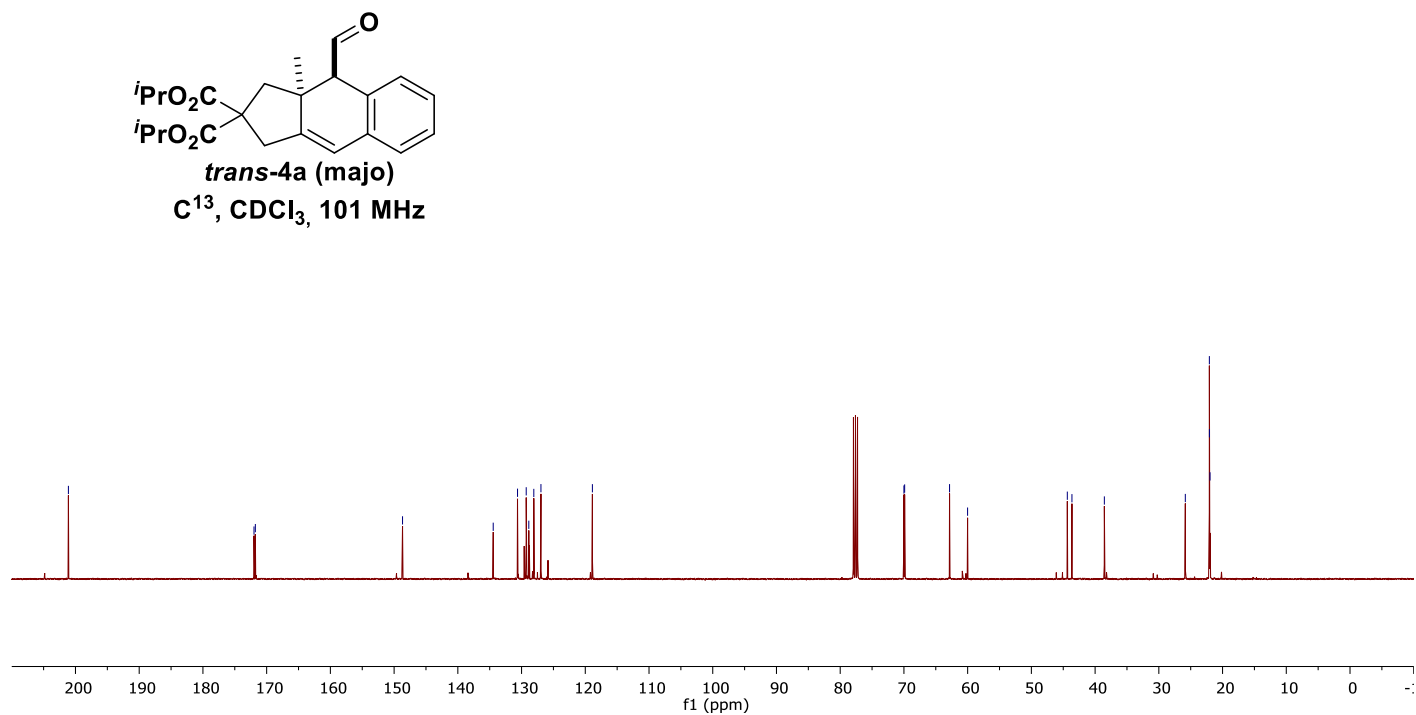

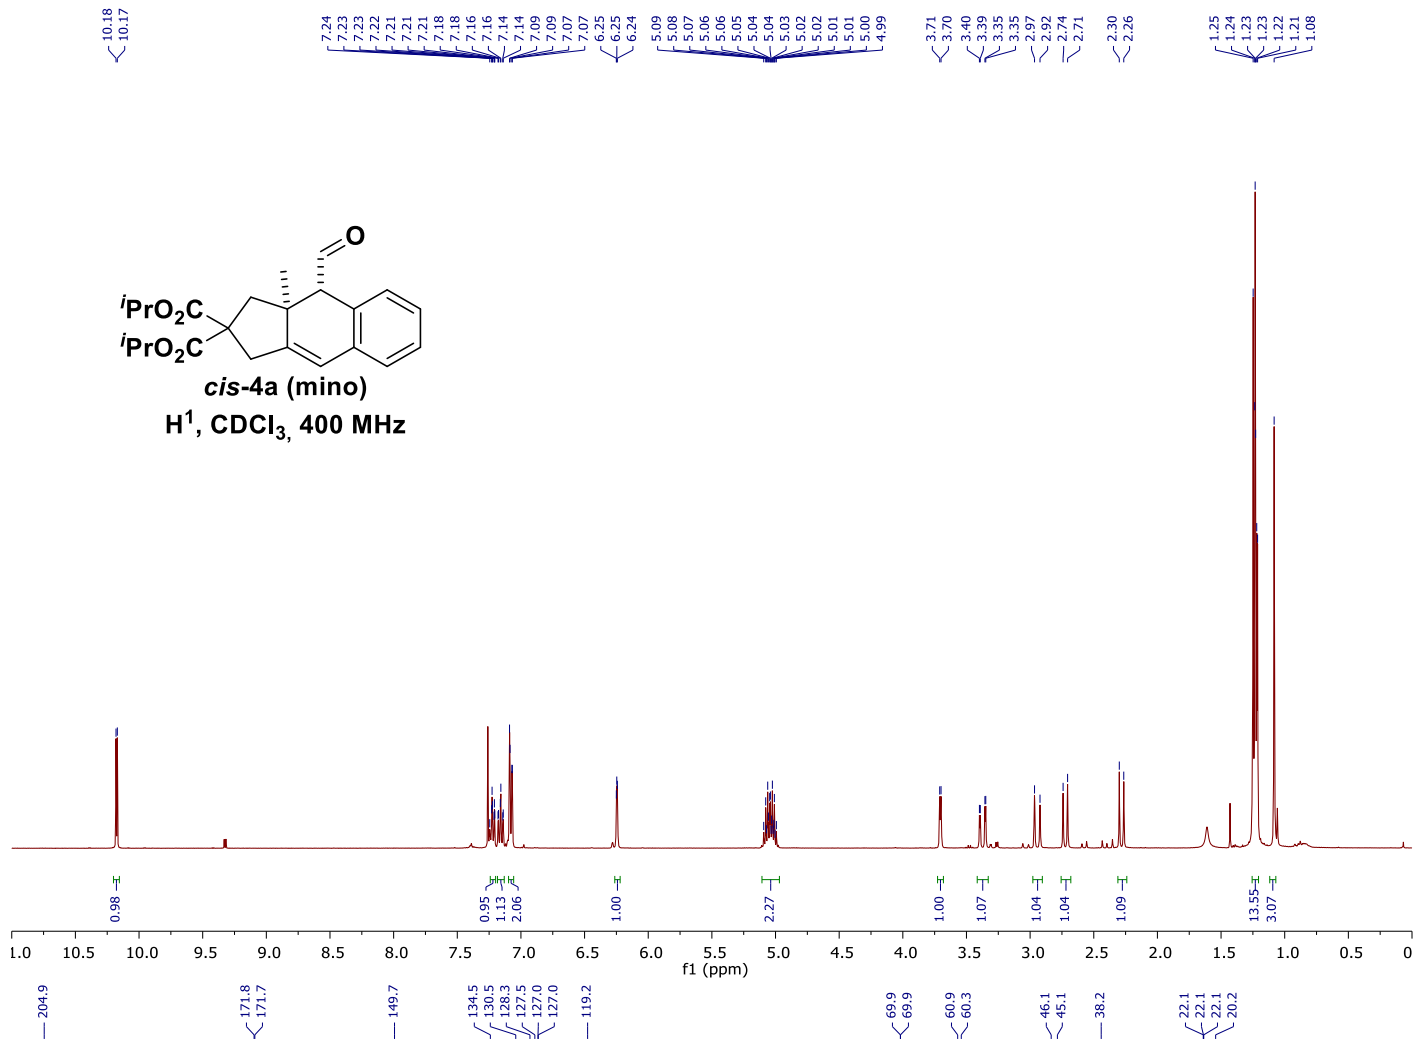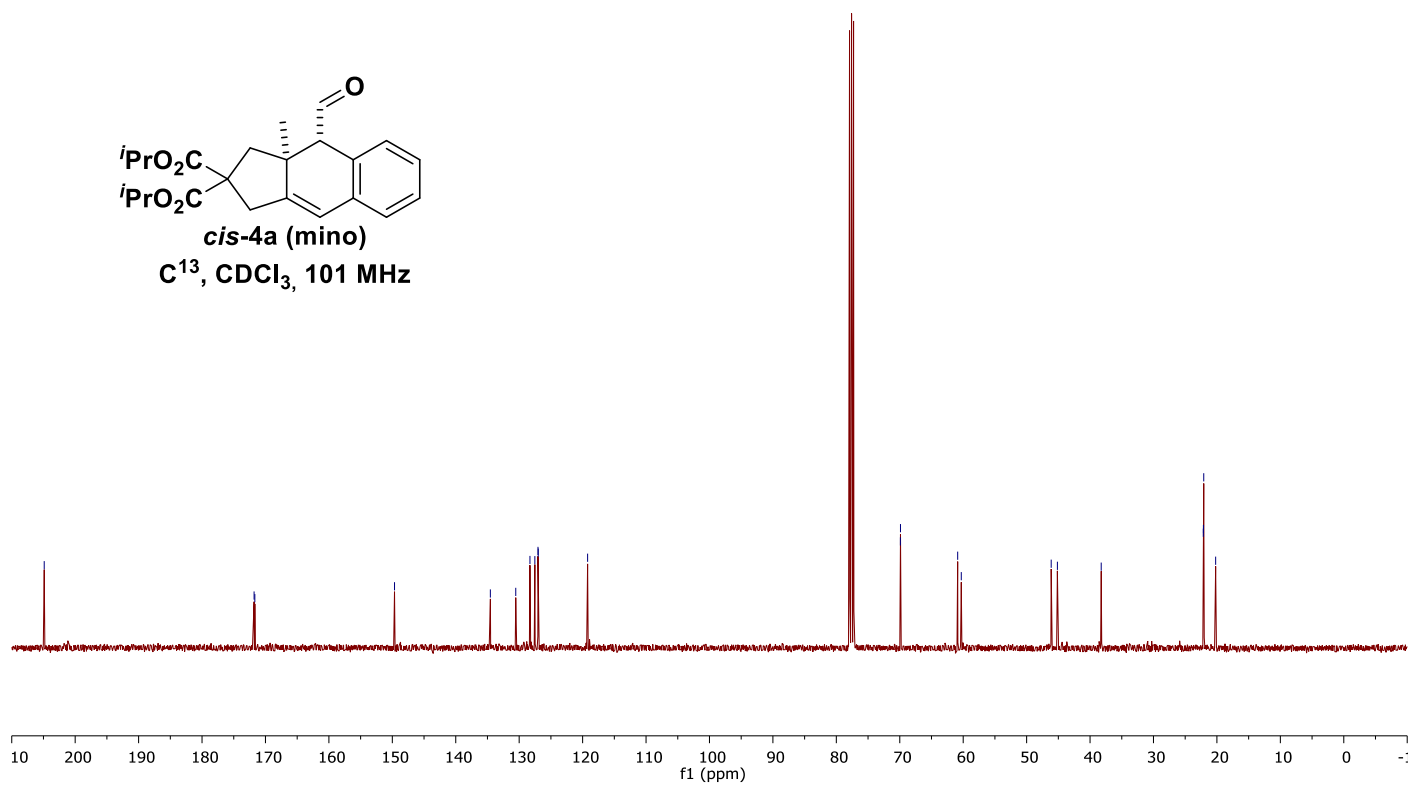

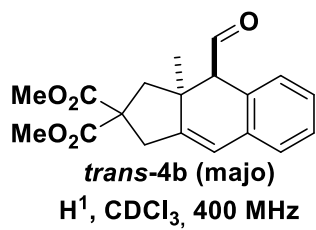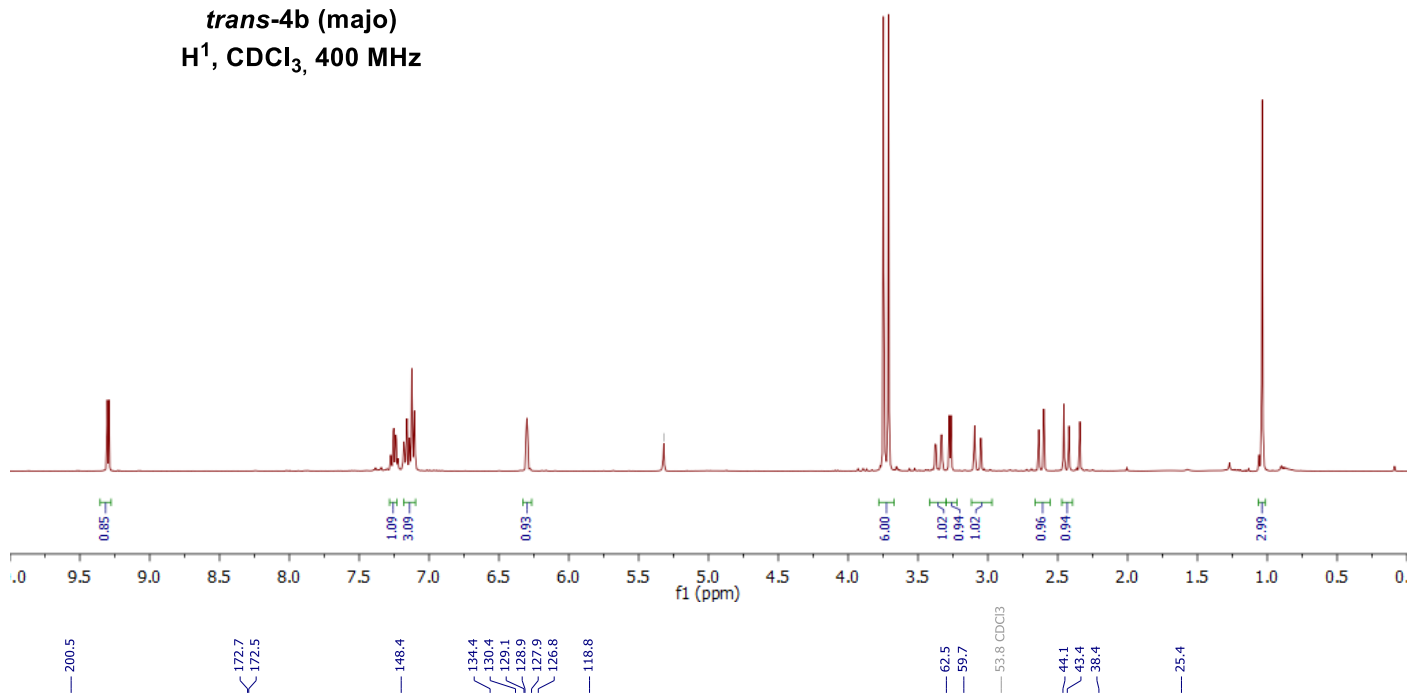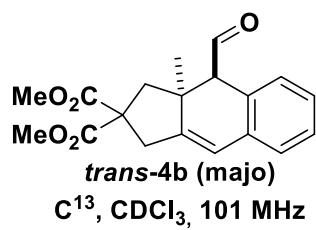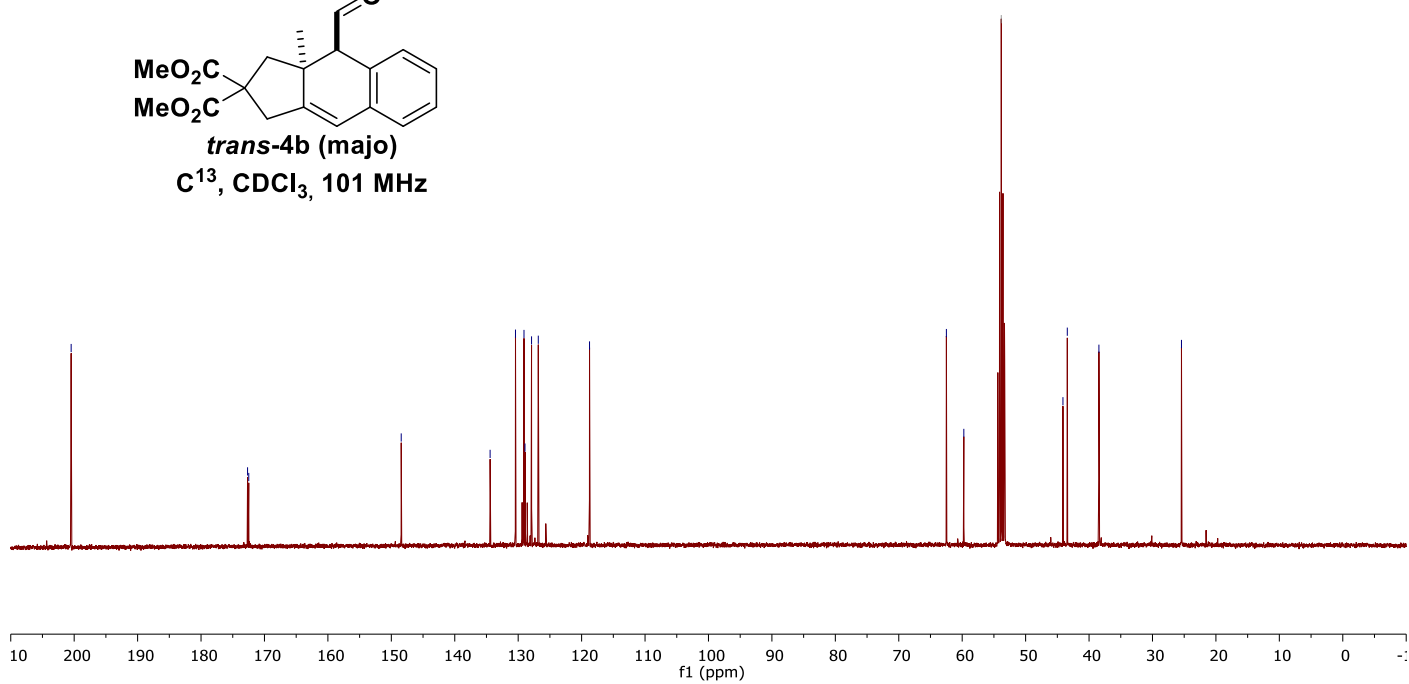

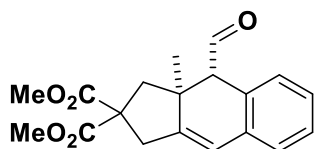

*cis*-4b (mino)  
H<sup>1</sup>, CDCl<sub>3</sub>, 400 MHz

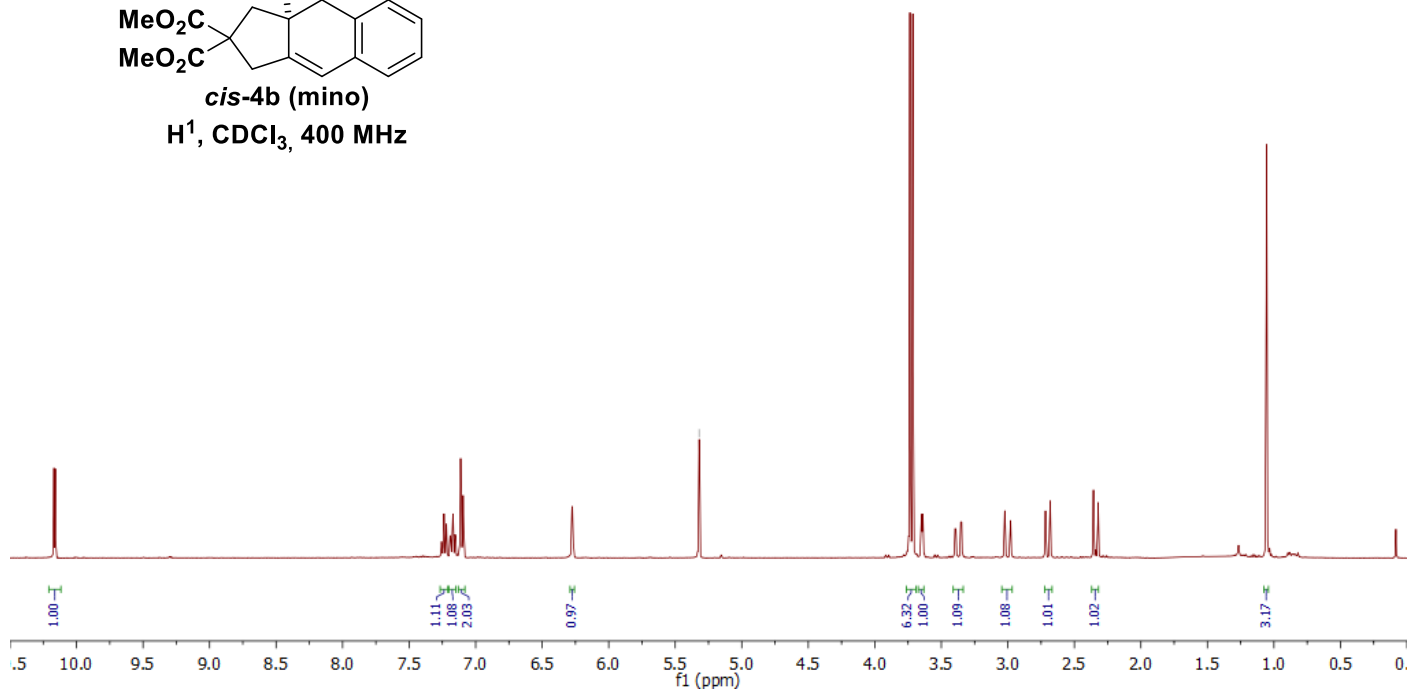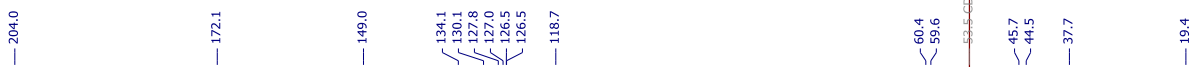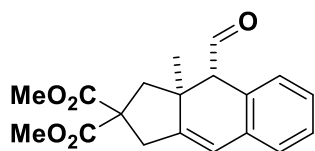

*cis*-4b (mino)  
C<sup>13</sup>, CDCl<sub>3</sub>, 101 MHz

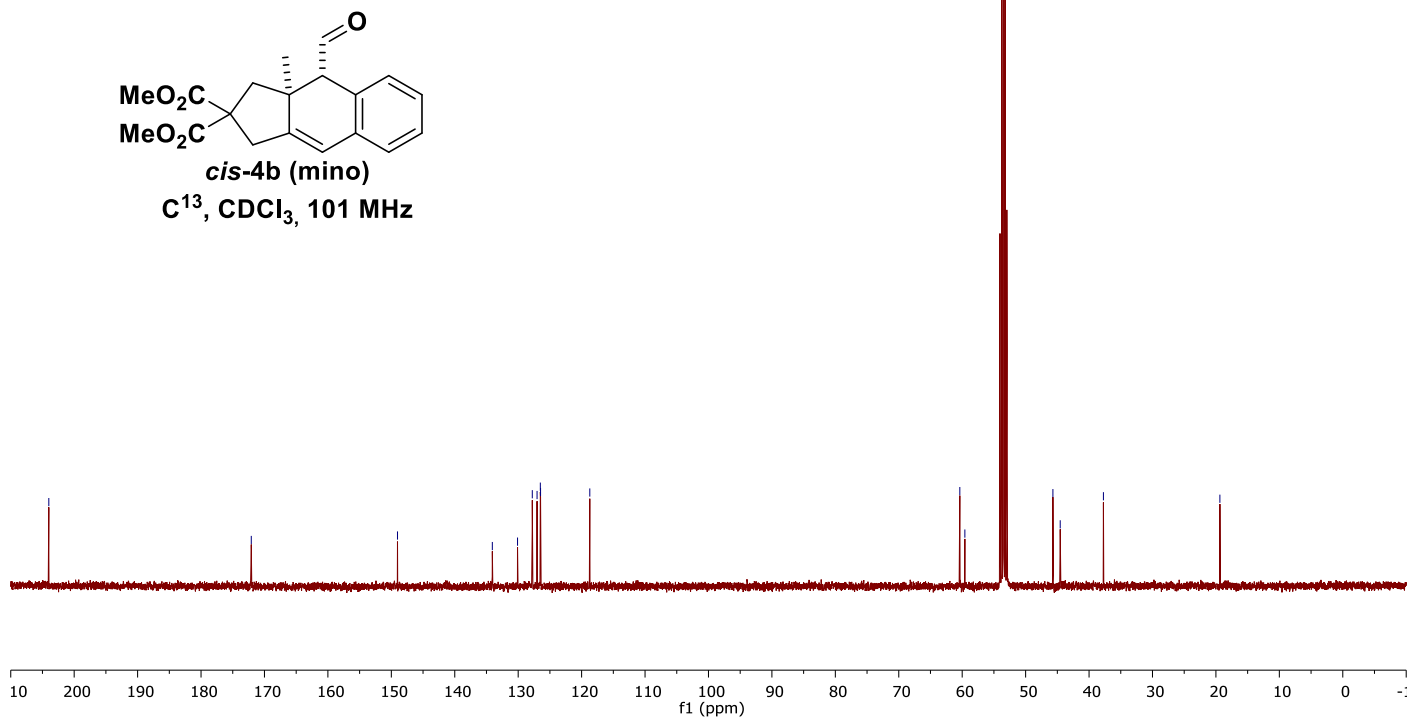

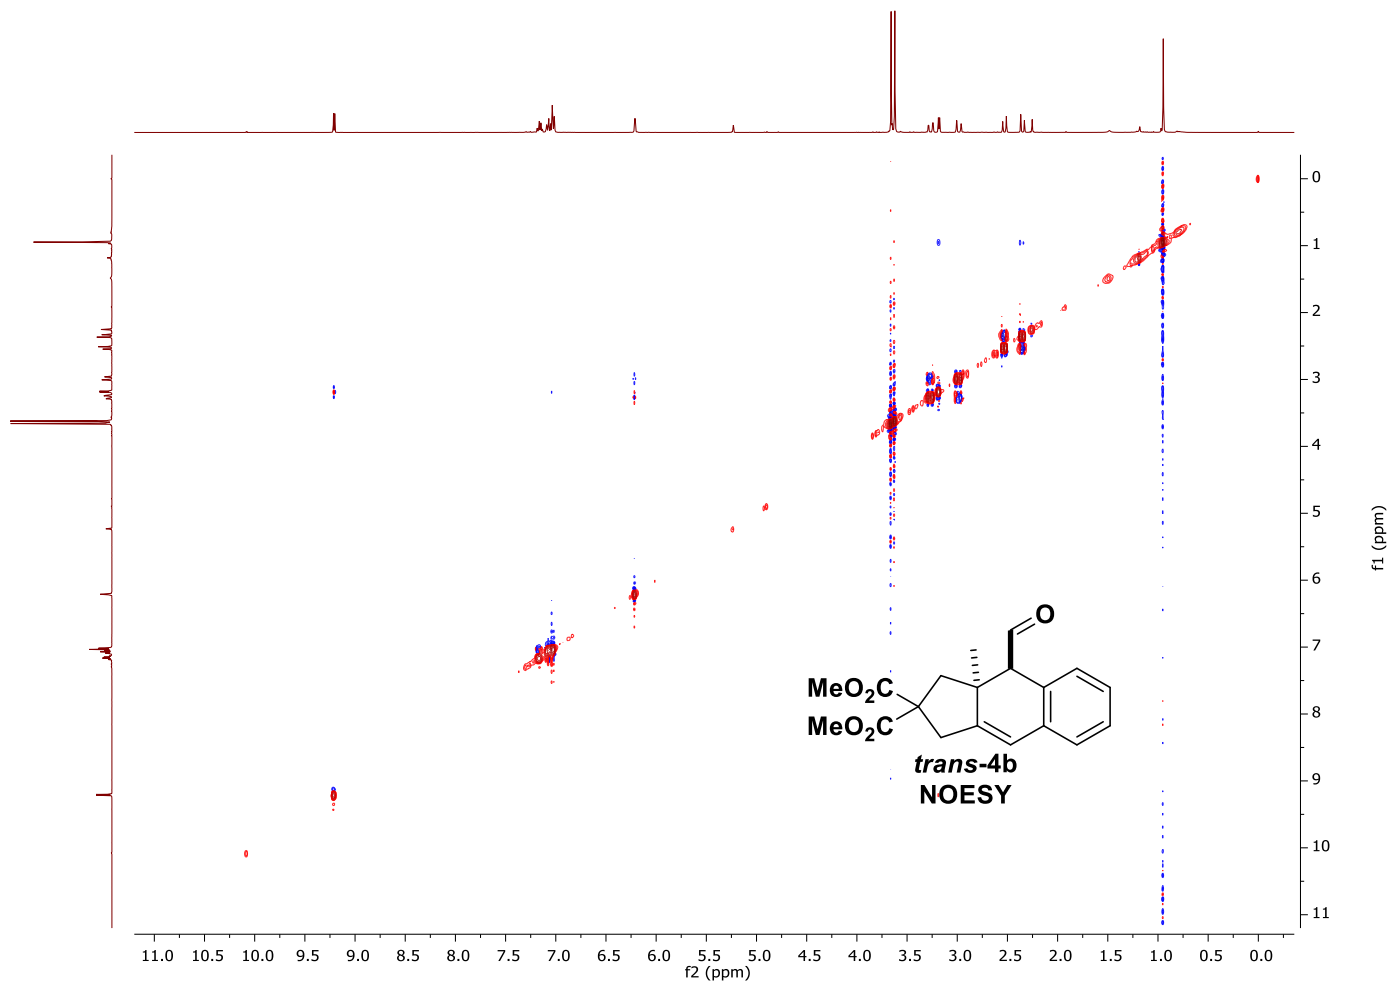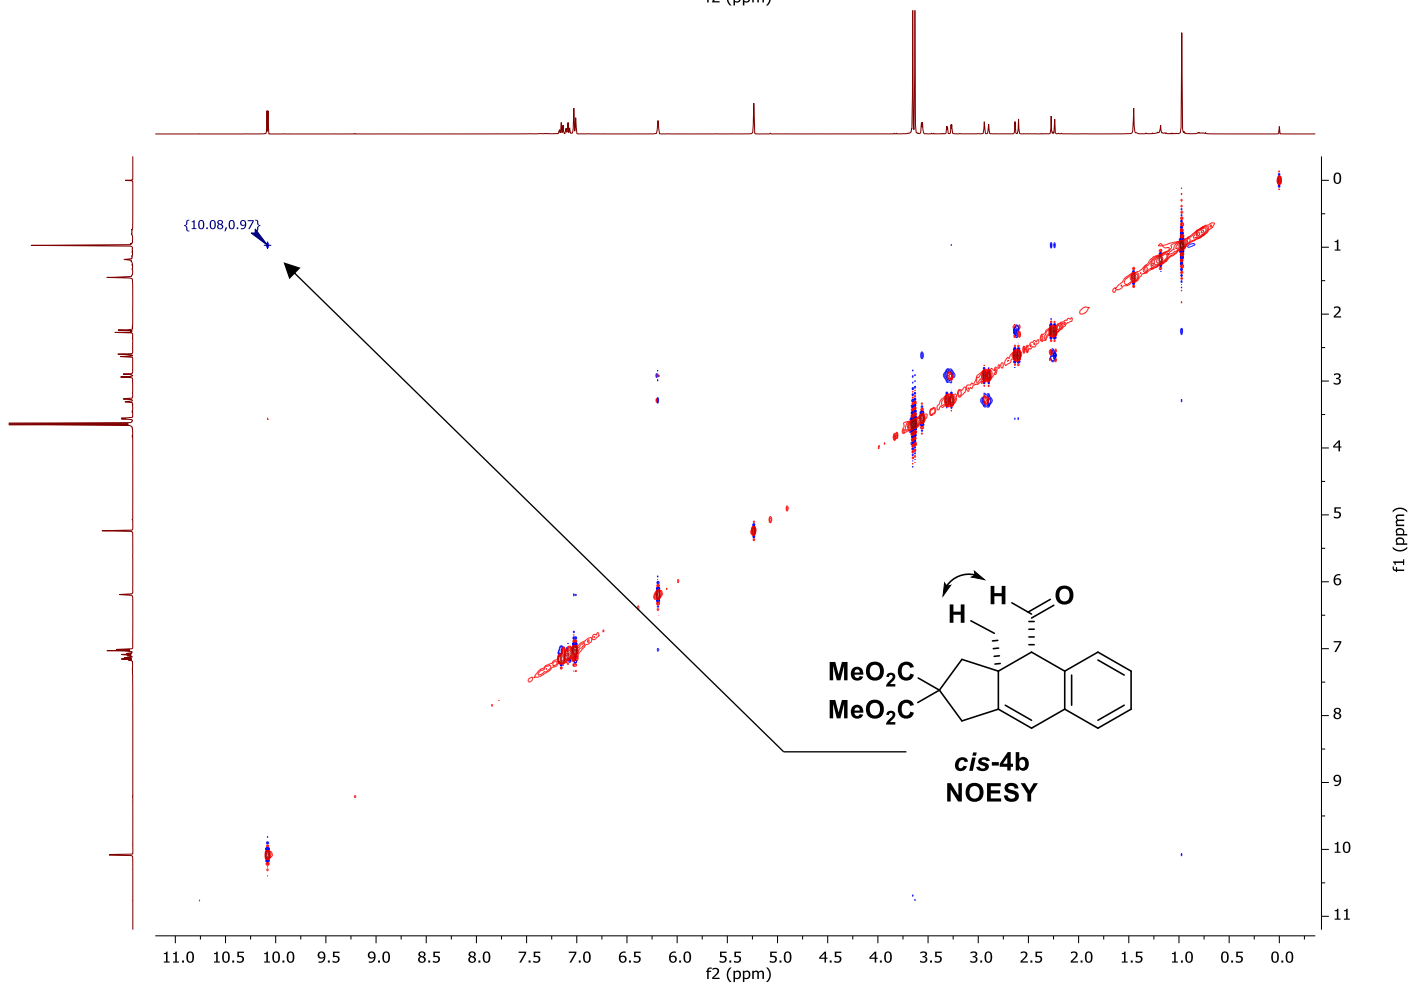

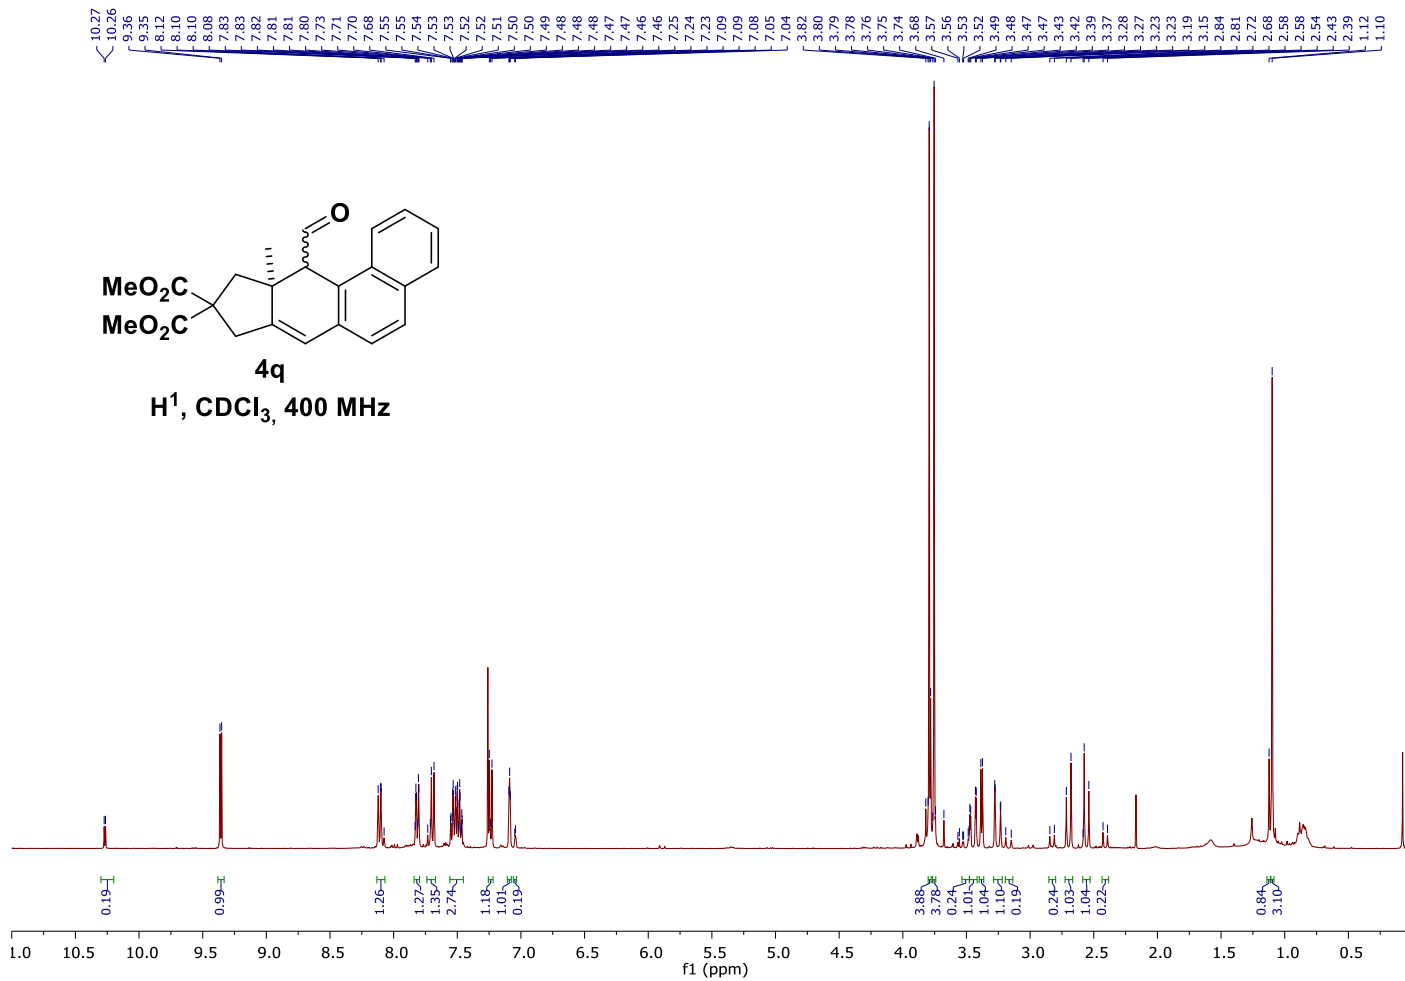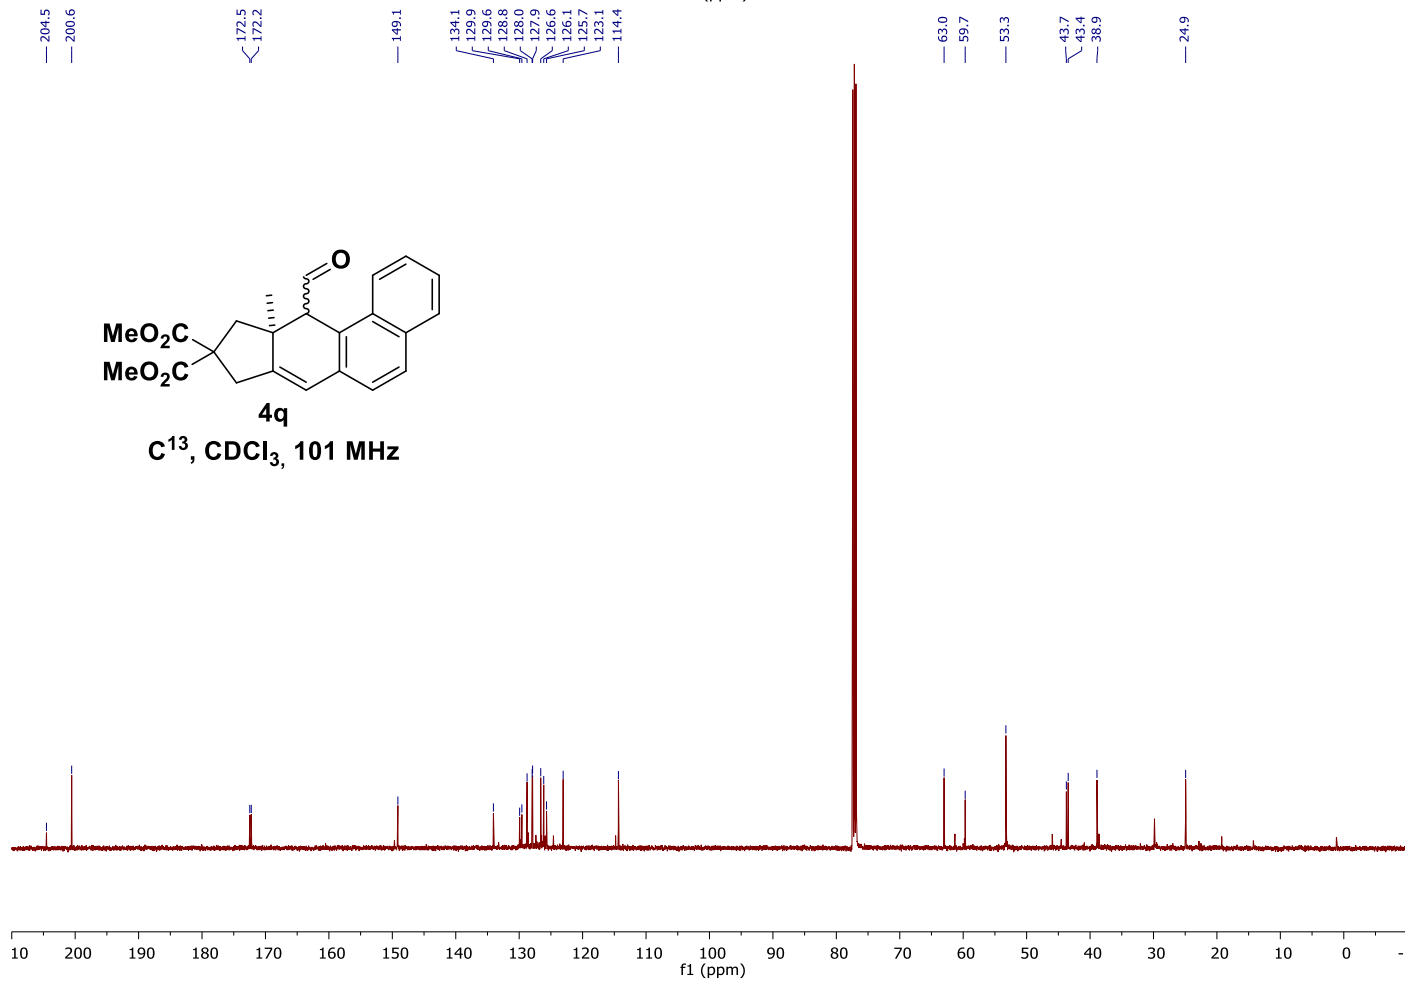

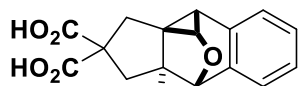

5

$H^1$ ,  $CDCl_3$ , 400 MHz

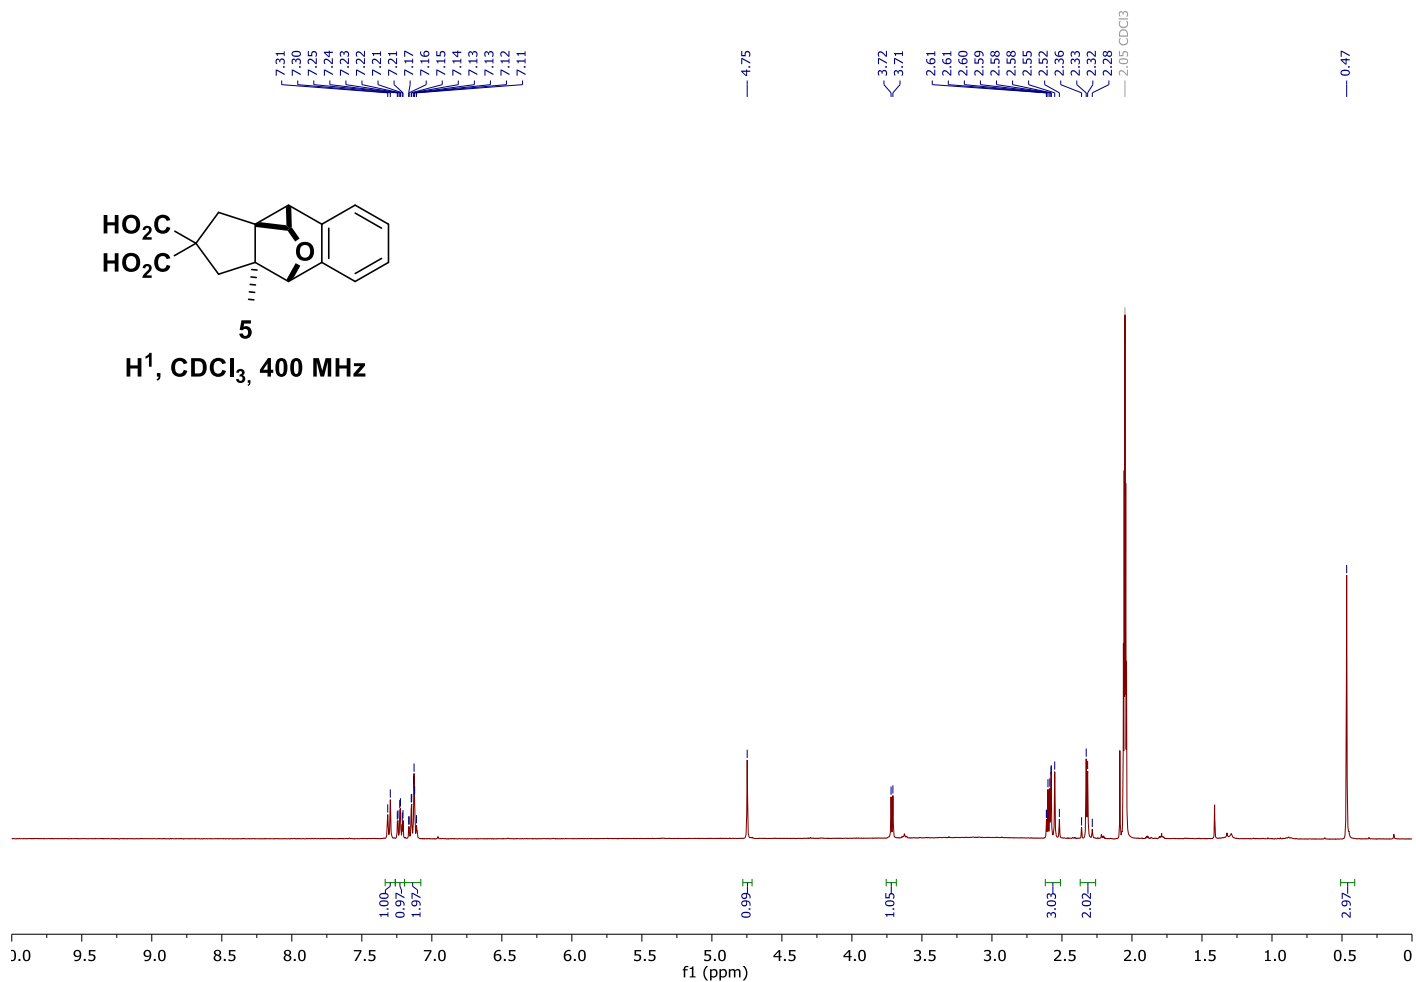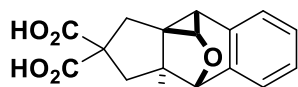

5

$C^{13}$ ,  $CDCl_3$ , 101 MHz

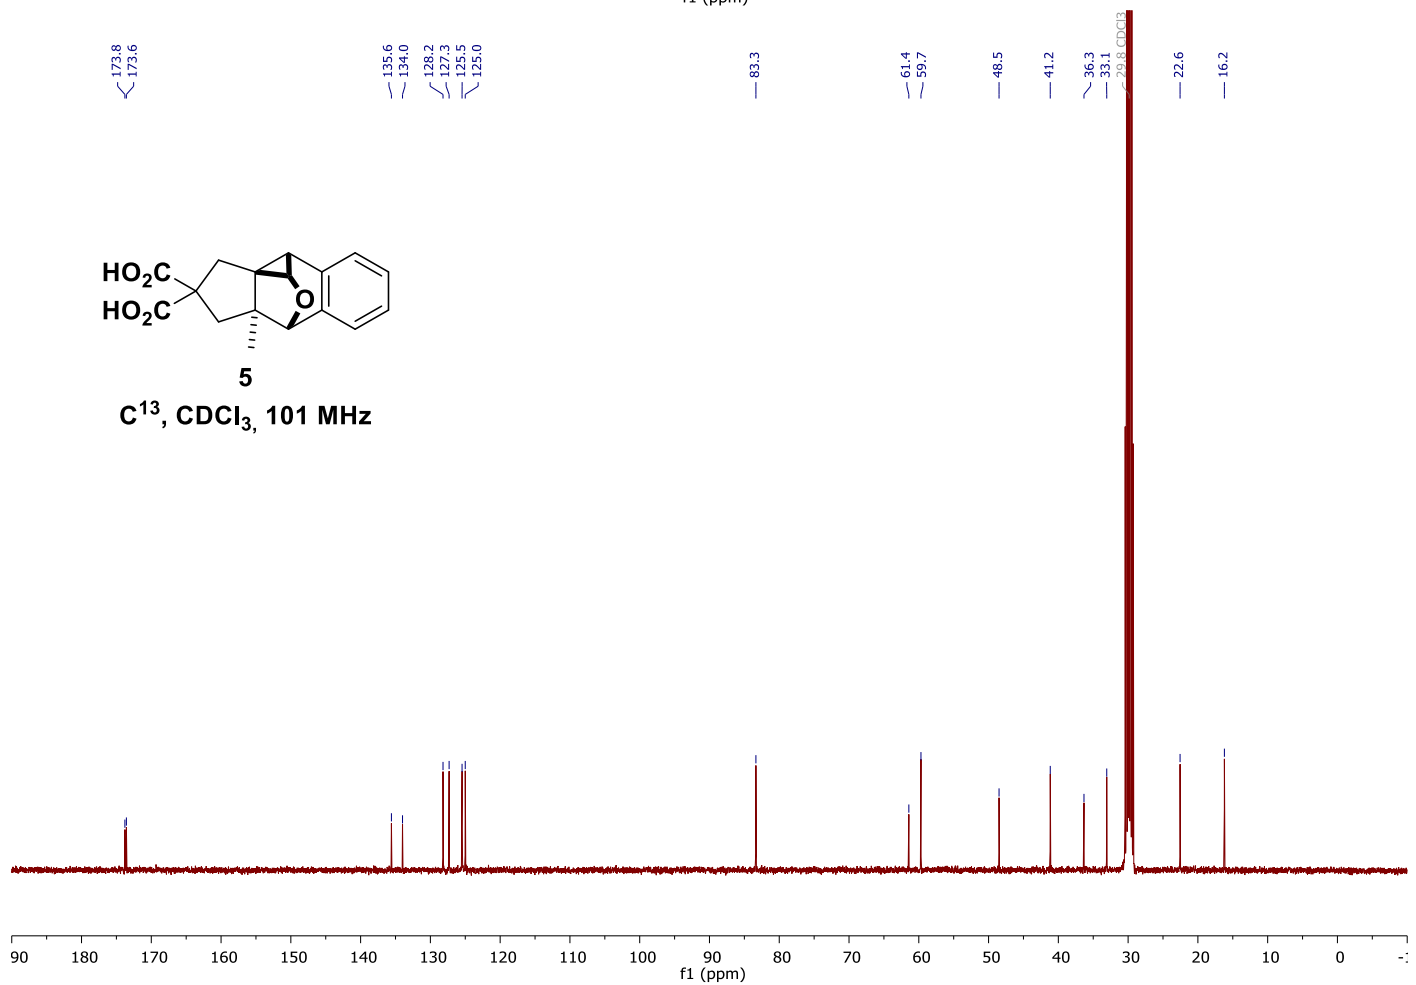



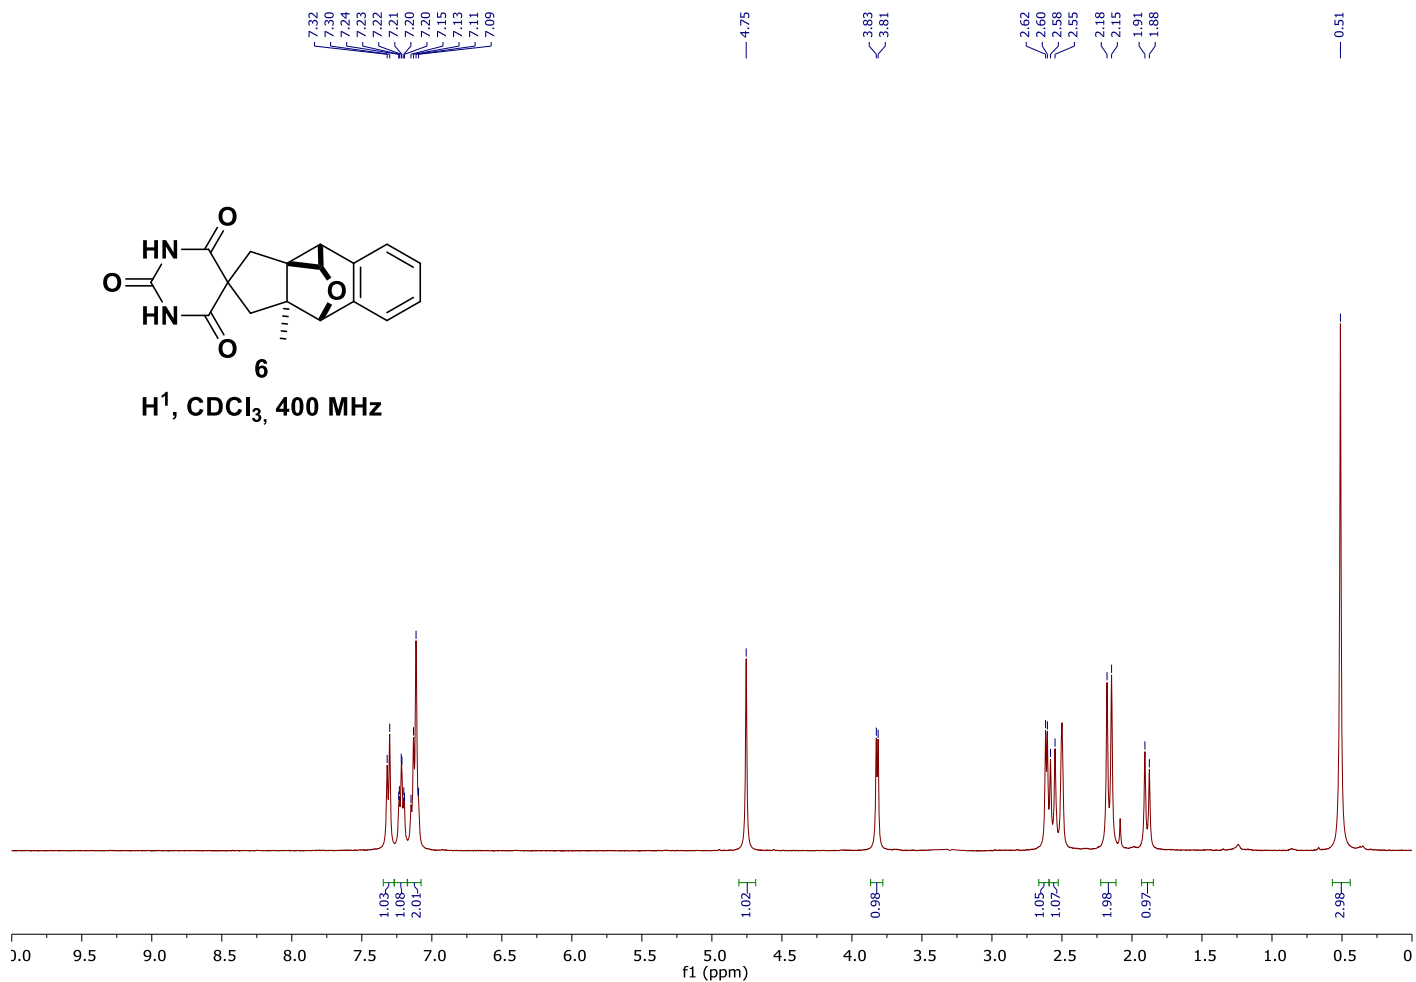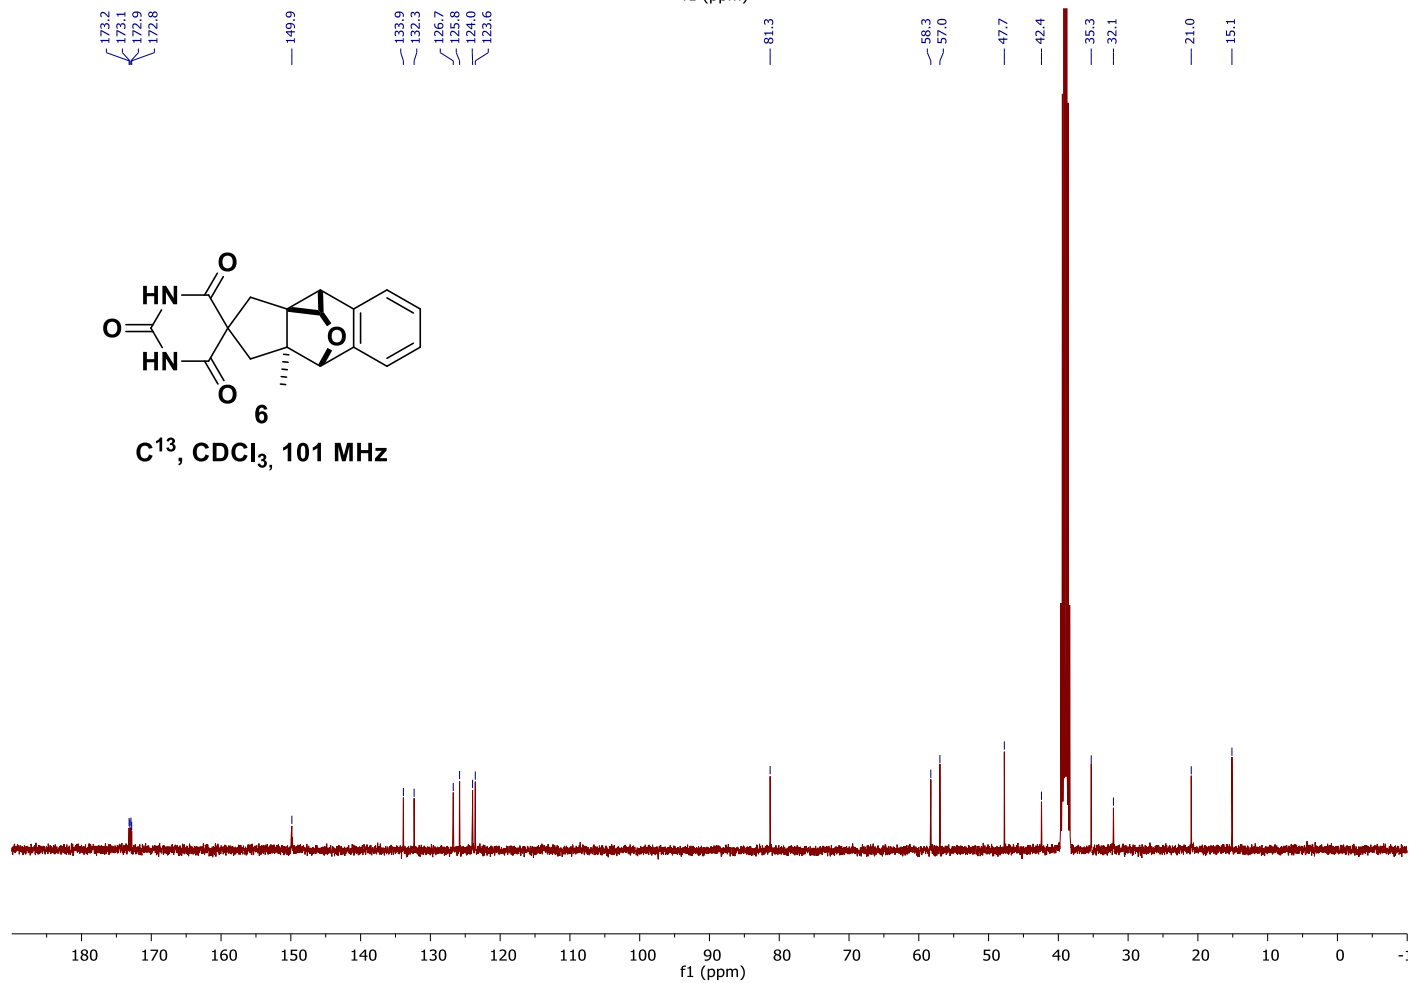

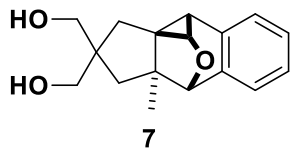

$^1\text{H}$ ,  $\text{CDCl}_3$ , 400 MHz

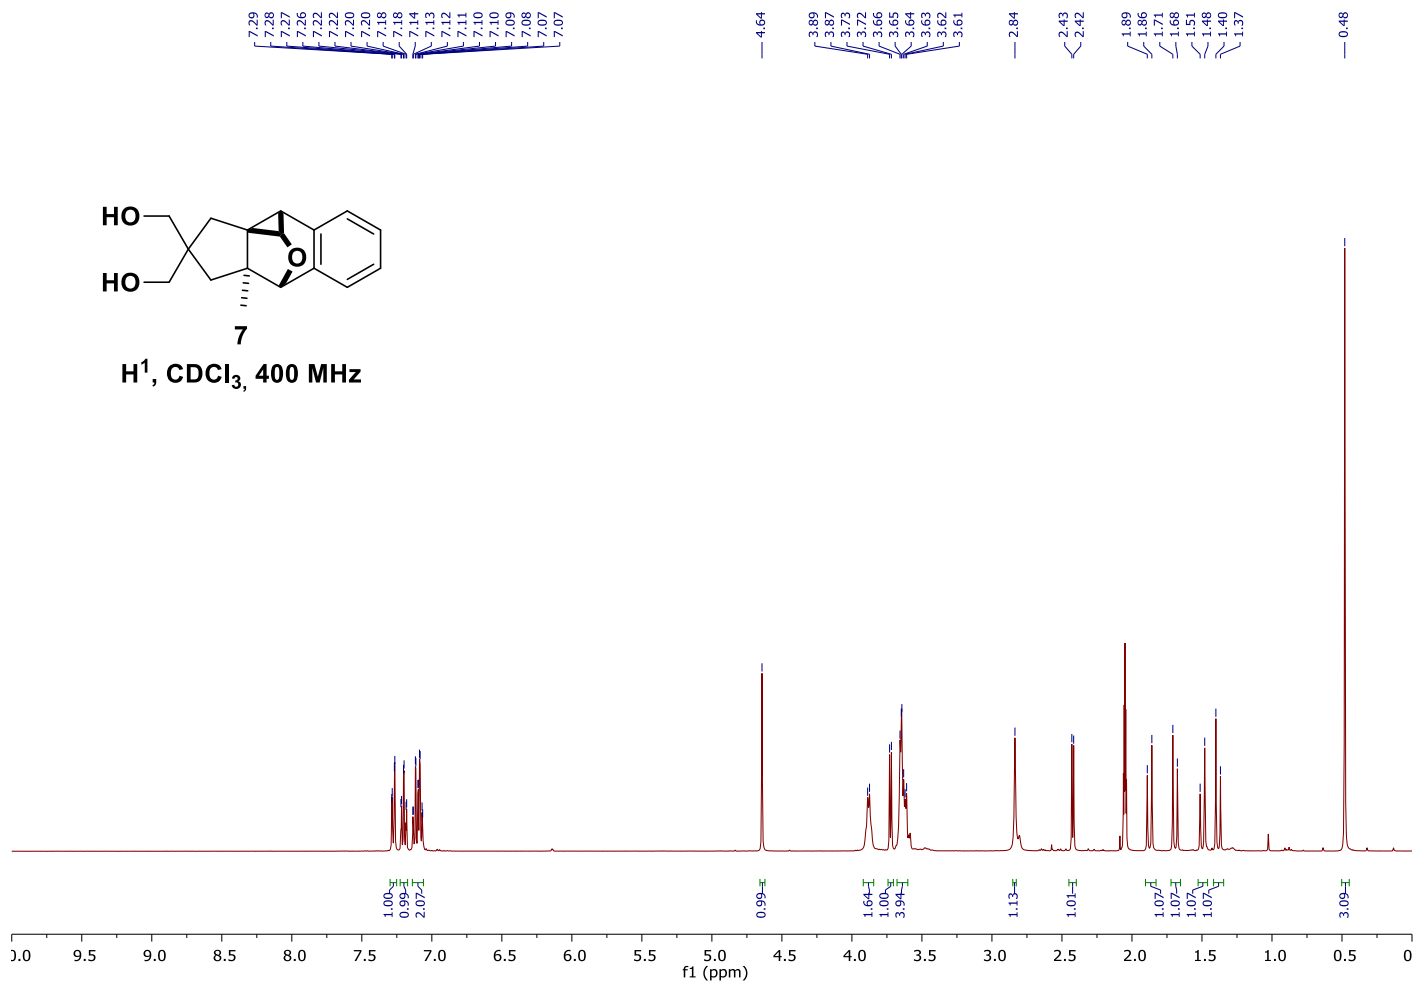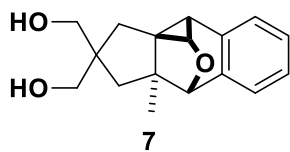

$^{13}\text{C}$ ,  $\text{CDCl}_3$ , 101 MHz

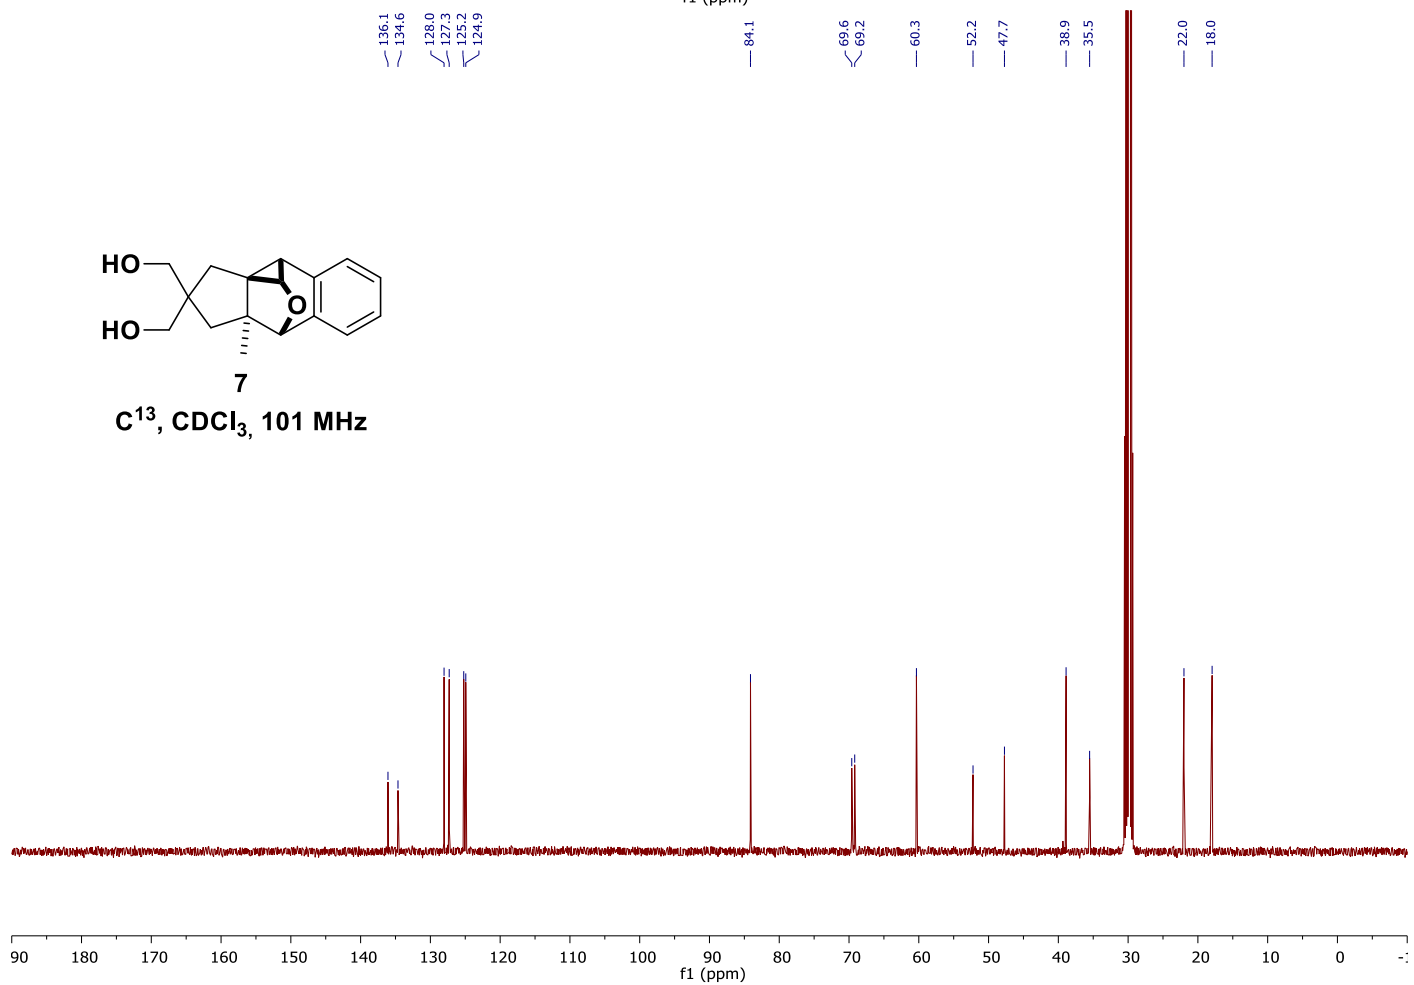

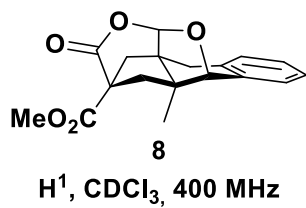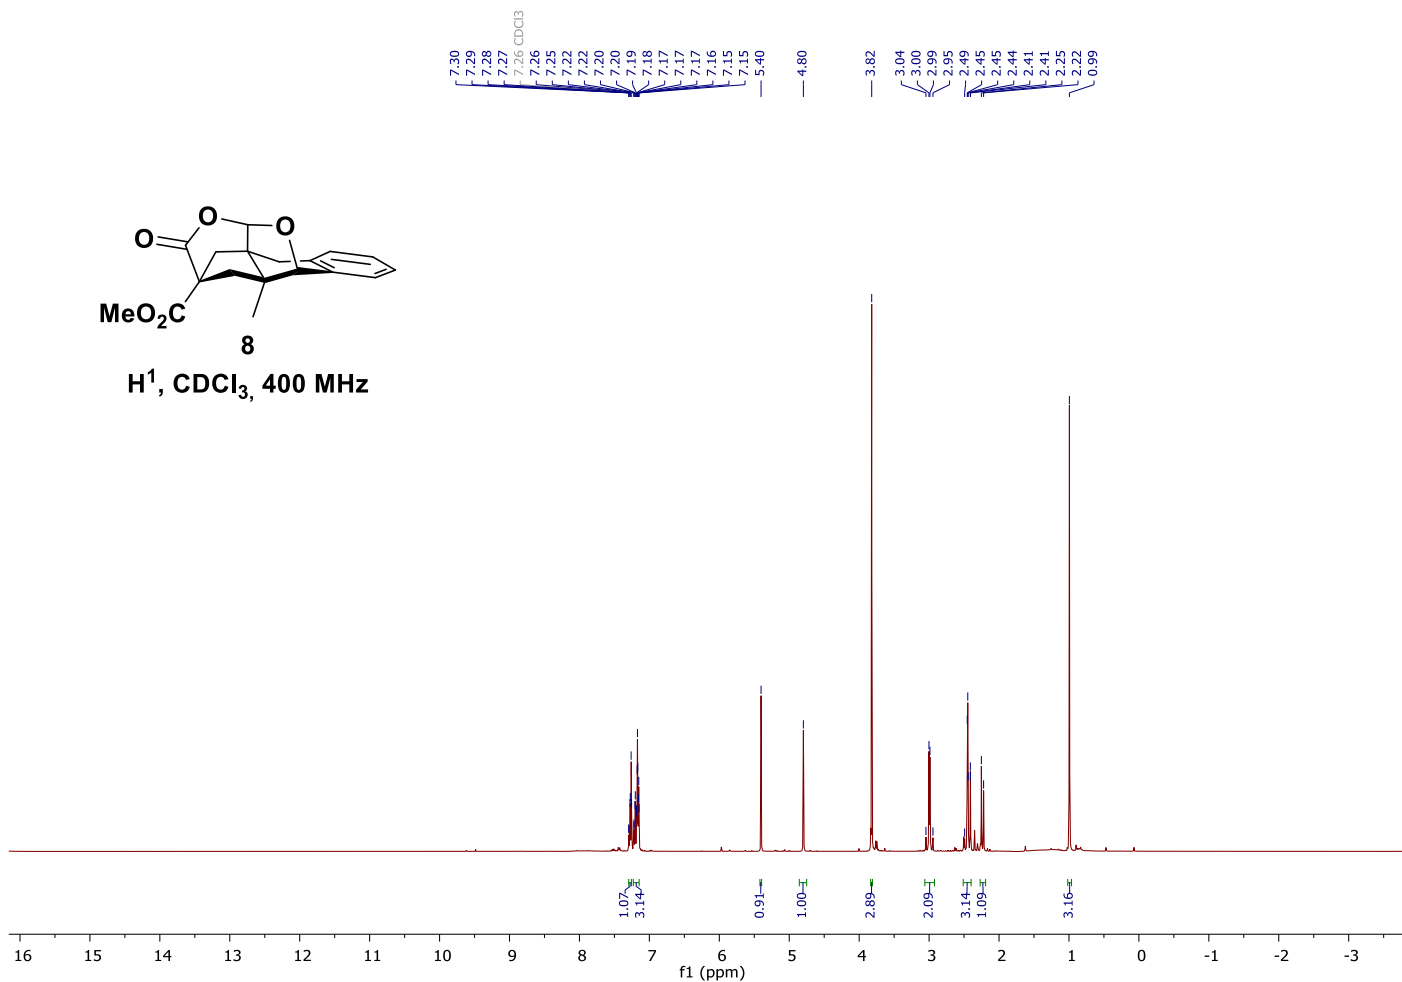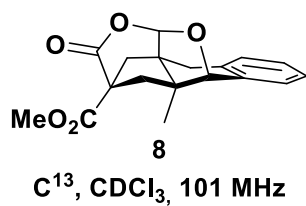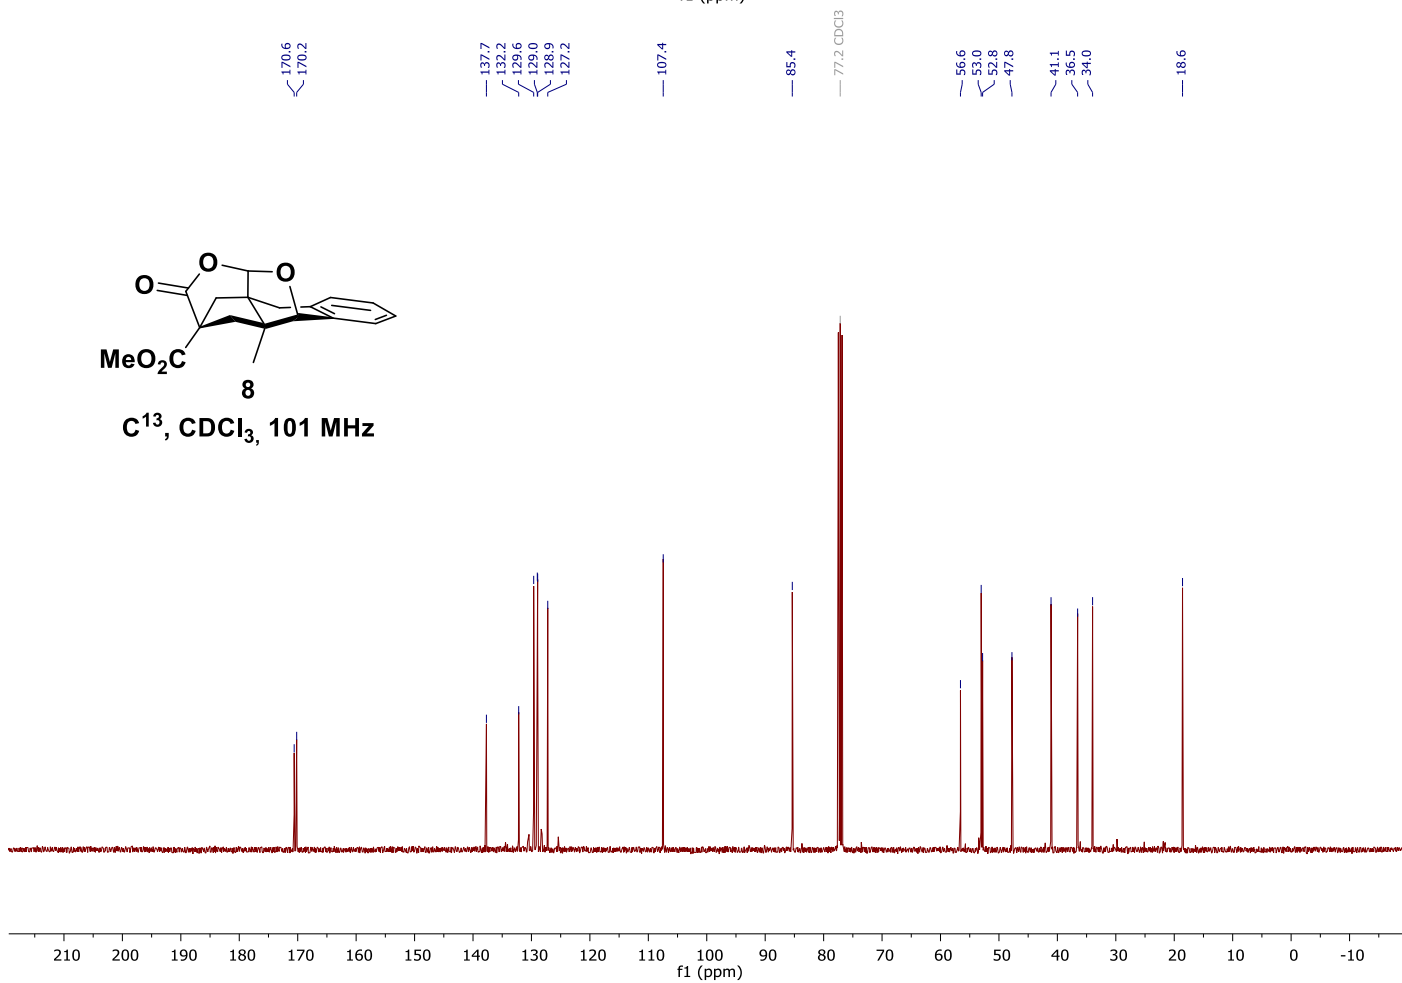

Supplement: d4qo00867g1.pdf [file d4qo00867g1.pdf]
